# Supplementary material for: Regulatory responses of Methanosarcina barkeri to freezing temperatures and perchlorates: Transcriptomic insights into the potential for biological Martian methanogenesis
Source: Research Square preprint supplement (doi:10.21203/rs.3.rs-247246/v1), 2021-02-22
Supplement: Supplementary file 2 [file 5faa98fe9b36c75d2bada988.xlsx]

## Sheet: Sheet1
	Table S2. Average +/- SD transcript fragment counts per million mapped reads (FPM). N = 3 libraries per condition. Open Reading Frame number coincides with same x-axis value in Figs. S1 and S2.
	Open Reading Frame	Product	Protein ID	30˚C Control	SD 30˚C Control	30˚C Ca-perchlorate	SD 30˚C Ca-perchlorate	30˚C Mg-perchlorate	SD 30˚C Mg-perchlorate	30˚C Na-perchlorate	SD 30˚C Na-perchlorate	0˚C Control	SD 0˚C Control	0˚C Ca-perchlorate	SD 0˚C Ca-perchlorate	0˚C Mg-perchlorate	SD 0˚C Mg-perchlorate	0˚C Na-perchlorate	SD 0˚C Na-perchlorate
Origin of replication recognition protein / Cell division control protein 6] [protein_id=AKB53023.1	1	Origin of replication recognition protein / Cell division control protein 6	AKB53023.1	102.585	19.3682	99.2352	8.9829	88.1028	16.213	92.2677	6.61508	101.877	13.5458	91.8703	20.2962	107.574	24.692	111.586	11.9706
Dephospho-CoA kinase archaeal, predicted] [protein_id=AKB53024.1	2	Dephospho-CoA kinase archaeal, predicted	AKB53024.1	31.5115	4.5919	34.8868	9.86039	42.709	4.88424	34.2565	8.02931	49.1558	10.0196	37.4841	6.63772	29.688	4.27466	31.6086	3.90829
DUF54 conserved in archaea] [protein_id=AKB53025.1	3	DUF54 conserved in archaea	AKB53025.1	13.6913	1.25663	25.0335	14.6754	16.6461	6.20107	17.2206	3.24692	15.8675	5.49195	17.4141	7.3994	14.5588	4.73651	19.8891	4.66669
Sugar phosphate isomerase/epimerase] [protein_id=AKB53026.1	4	Sugar phosphate isomerase/epimerase	AKB53026.1	68.0041	6.95218	70.4036	11.7524	60.3772	6.19304	77.5655	17.1533	65.6343	6.82481	63.3171	9.35985	63.5238	11.4608	64.786	2.86893
hypothetical protein] [protein_id=AKB53027.1	5	hypothetical protein	AKB53027.1	24.1587	8.67432	23.3066	7.11414	36.7431	10.5402	22.0728	3.35154	27.7125	10.9314	27.2417	5.55751	28.5271	3.30729	31.5495	6.37557
Translation elongation factor 1 alpha-related protein] [protein_id=AKB53028.1	6	Translation elongation factor 1 alpha-related protein	AKB53028.1	182.619	41.7188	184.027	8.31621	197.367	20.4371	199.491	29.4557	205.183	23.5627	157.154	17.0994	194.633	40.7577	226.774	33.157
RNA ligase, family] [protein_id=AKB53029.1	7	RNA ligase, family	AKB53029.1	54.388	0.431316	54.6523	14.1307	70.0289	8.08669	59.6717	6.36951	46.8571	10.7272	63.7117	12.1981	48.4347	22.8561	51.2193	13.0931
DUF124 domain-containing protein] [protein_id=AKB53030.1	8	DUF124 domain-containing protein	AKB53030.1	192.9	23.0163	185.979	9.48336	113.58	11.4653	116.929	15.3493	160.255	17.7796	184.71	23.0287	175.424	38.4903	150.634	22.4875
hypothetical protein] [protein_id=AKB53005.1	9	hypothetical protein	AKB53005.1	4947.97	696.047	4464.8	646.215	4615.05	116.001	4571.19	612.237	3421.53	247.198	4552.04	380.041	3928.42	387.902	4611.88	650.815
Inosine-5'-monophosphate dehydrogenase] [protein_id=AKB53031.1	10	Inosine-5'-monophosphate dehydrogenase	AKB53031.1	706.391	169.056	673.858	160.861	625.564	41.7375	775.785	85.4456	788.159	21.573	539.419	39.3935	727.724	193.598	649.755	124.244
dolichyl-phosphate beta-D-mannosyltransferase] [protein_id=AKB53006.1	11	dolichyl-phosphate beta-D-mannosyltransferase	AKB53006.1	4.31472	4.13696	4.84854	4.48451	3.84168	1.01252	0.209231	0.3624	3.52577	2.47817	2.23	1.44553	3.22882	1.43116	6.62046	3.31624
Inosine-5'-monophosphate dehydrogenase] [protein_id=AKB53032.1	12	Inosine-5'-monophosphate dehydrogenase	AKB53032.1	669.626	98.9473	911.52	144.759	988.606	39.7598	952.598	17.4469	738.463	66.4238	820.128	44.2202	786.311	5.75677	865.346	68.5775
hypothetical protein] [protein_id=AKB53033.1	13	hypothetical protein	AKB53033.1	256.463	43.6954	233.968	40.3183	282.684	16.0711	291.628	32.9074	274.431	23.6648	190.756	8.34798	285.985	80.7466	307.514	27.9769
hypothetical protein] [protein_id=AKB53034.1	14	hypothetical protein	AKB53034.1	146.784	38.6843	125.227	39.3834	154.179	32.099	156.093	36.1452	137.299	35.0118	101.386	15.3163	125.196	42.6333	106.966	4.88625
hypothetical protein] [protein_id=AKB53035.1	15	hypothetical protein	AKB53035.1	121.864	34.1826	100.574	6.15313	163.819	29.9724	183.158	10.8171	117	16.4886	99.2476	5.33137	130.027	27.6025	132.385	5.8531
Replication factor A (ssDNA-binding protein)] [protein_id=AKB53036.1	16	Replication factor A (ssDNA-binding protein)	AKB53036.1	168.639	25.1314	168.117	27.9149	194.684	27.9874	204.428	45.336	219.955	12.2538	149.351	15.9696	211.181	58.5915	207.937	28.3639
Ribosomal protein S6] [protein_id=AKB53010.1	17	Ribosomal protein S6	AKB53010.1	11.6728	4.03233	15.1038	4.22738	14.0311	4.95534	9.19015	4.20298	9.4671	4.89433	14.9292	4.66919	9.10912	9.56248	5.76317	2.75448
RNA:NAD 2'-phosphotransferase] [protein_id=AKB53037.1	18	RNA:NAD 2'-phosphotransferase	AKB53037.1	148.849	21.1159	123.841	5.59557	143.126	5.26672	137.715	27.4269	113.463	13.4887	151.187	23.4	128.21	41.8754	101.913	3.05175
RNA 3'-terminal phosphate cyclase] [protein_id=AKB53038.1	19	RNA 3'-terminal phosphate cyclase	AKB53038.1	14.7192	5.83685	24.5393	6.30615	30.5259	7.72962	29.7802	8.41205	28.6312	3.55171	32.3534	1.0586	34.7936	5.38746	26.9566	3.55233
Glutamine--fructose-6-phosphate aminotransferase (isomerizing)] [protein_id=AKB53039.1	20	Glutamine--fructose-6-phosphate aminotransferase (isomerizing)	AKB53039.1	35.5153	5.89605	38.3758	7.13715	40.9243	8.16548	35.8465	10.331	35.7682	3.75693	30.5821	0.929843	37.079	6.43311	43.3266	5.0991
Mobile element protein] [protein_id=AKB53014.1	21	Mobile element protein	AKB53014.1	32.1005	6.63117	33.8205	9.82147	23.6719	7.88669	32.4846	8.33394	30.6301	7.71583	36.3524	6.02914	34.1479	6.97184	34.7222	8.72825
DNA primase] [protein_id=AKB53040.1	22	DNA primase	AKB53040.1	405.1	55.9264	662.269	97.9758	629.179	63.726	643.51	85.01	641.092	73.9104	582.613	67.0282	628.736	80.5439	708.209	33.5238
Mobile element protein] [protein_id=AKB53015.1	23	Mobile element protein	AKB53015.1	8.30944	5.89706	7.16288	5.72762	8.80199	5.06225	5.46774	1.67833	9.82119	6.11513	4.18185	1.43994	9.45764	3.29162	7.70662	4.16081
hypothetical protein] [protein_id=AKB53041.1	24	hypothetical protein	AKB53041.1	649.674	272.314	491.301	44.0256	375.081	9.59326	330.845	43.5595	445.614	59.0821	456.558	3.99806	307.954	126.748	269.396	40.4382
Ribosomal-protein-S18p-alanine acetyltransferase] [protein_id=AKB53042.1	25	Ribosomal-protein-S18p-alanine acetyltransferase	AKB53042.1	236.788	66.634	122.553	28.7879	104.387	19.9133	80.6501	5.10456	134.539	14.9834	103.251	9.82649	87.0638	17.5143	77.8312	4.60758
archaeosine tRNA-ribosyltransferase type 2] [protein_id=AKB53043.1	26	archaeosine tRNA-ribosyltransferase type 2	AKB53043.1	108.562	2.37653	167.368	20.7541	127.599	13.4861	104.617	25.8053	169.574	29.1863	143.207	7.15274	154.788	16.4695	198.971	34.4462
FAD/FMN-containing dehydrogenase] [protein_id=AKB53044.1	27	FAD/FMN-containing dehydrogenase	AKB53044.1	172.223	51.5149	154.052	12.6846	157.589	11.7756	158.685	23.2697	184.438	5.50305	165.99	24.2974	221.831	47.0542	202.45	60.7357
Fe-S oxidoreductase] [protein_id=AKB53045.1	28	Fe-S oxidoreductase	AKB53045.1	171.816	32.2093	221.739	17.8199	206.693	9.18851	211.92	42.3501	216.215	26.305	253.968	27.69	207.658	41.3054	226.953	46.5288
Radical SAM domain heme biosynthesis protein] [protein_id=AKB53046.1	29	Radical SAM domain heme biosynthesis protein	AKB53046.1	21.5362	9.50261	23.4974	7.96232	24.5062	5.90042	35.5502	9.84203	22.2793	1.81047	28.4073	7.63866	24.506	4.2925	30.0217	2.58922
hypothetical protein] [protein_id=AKB53047.1	30	hypothetical protein	AKB53047.1	1.15248	1.99615	3.97255	4.19381	2.25065	0.455305	4.95604	3.7328	6.43281	3.88295	2.95466	1.81276	6.21378	1.65592	4.39345	3.61077
hypothetical protein] [protein_id=AKB53048.1	31	hypothetical protein	AKB53048.1	5.68863	3.94522	8.36515	2.61457	8.70787	3.49001	5.65027	3.83211	4.19599	2.30901	5.38667	1.47039	5.20709	1.64365	10.6137	6.29033
hypothetical protein] [protein_id=AKB53049.1	32	hypothetical protein	AKB53049.1	6.64104	3.7566	12.4329	3.62733	15.4244	5.68949	8.65692	3.20479	10.8868	4.81289	14.226	3.69995	8.65842	6.97508	9.63882	2.5553
MDR-type permease] [protein_id=AKB53050.1	33	MDR-type permease	AKB53050.1	17.9542	6.22112	17.9336	2.07136	25.3177	6.49171	22.8127	7.81139	20.2592	0.97011	23.5478	4.22251	25.7108	2.51828	35.4353	12.4462
hypothetical protein] [protein_id=AKB53051.1	34	hypothetical protein	AKB53051.1	2.99609	3.91265	4.00456	3.48711	4.18965	2.75944	3.30765	2.92021	6.16116	3.18365	5.88923	2.73871	3.82054	1.87594	9.27746	6.47986
hypothetical protein] [protein_id=AKB53052.1	35	hypothetical protein	AKB53052.1	76.1187	23.5627	64.5386	7.77264	74.9643	11.5607	80.038	11.9194	62.7592	5.1116	53.3513	13.0008	47.431	16.8491	72.9811	5.80731
hypothetical protein] [protein_id=AKB53053.1	36	hypothetical protein	AKB53053.1	64.0356	11.0808	23.5621	8.31494	19.3837	11.4085	17.644	3.23966	25.6677	10.3302	12.1058	9.3449	20.1507	14.7051	30.9472	16.2566
hypothetical protein] [protein_id=AKB53054.1	37	hypothetical protein	AKB53054.1	93.2806	20.3907	94.4185	9.40619	115.626	20.5466	105.718	11.2488	74.4482	27.891	96.4329	7.18263	82.4491	13.0514	77.6598	9.20632
hypothetical protein] [protein_id=AKB53055.1	38	hypothetical protein	AKB53055.1	45.7621	11.3803	37.9492	9.55979	51.957	17.1339	60.5678	19.6233	39.4417	11.199	49.1546	8.61533	41.5377	15.2094	44.3679	15.4966
hypothetical protein] [protein_id=AKB53056.1	39	hypothetical protein	AKB53056.1	18.2847	15.6818	6.57217	5.98448	10.3452	3.2311	5.38068	1.61606	6.91854	4.61648	10.0642	3.08911	5.03157	5.08708	5.52264	4.05338
Fe-S OXIDOREDUCTASE] [protein_id=AKB53057.1	40	Fe-S OXIDOREDUCTASE	AKB53057.1	84.9051	21.1406	65.2282	11.448	78.5148	10.7883	89.9951	21.1413	92.4818	20.0983	58.4158	10.0543	88.7958	21.3573	86.3078	3.36852
metallo-beta-lactamase] [protein_id=AKB53058.1	41	metallo-beta-lactamase	AKB53058.1	47.7624	5.19151	69.5914	13.4392	87.3361	27.5724	90.7162	7.07721	83.1934	19.8095	70.1249	13.5731	77.2614	2.76569	73.1791	6.06135
Putative deoxyribonuclease YcfH] [protein_id=AKB53059.1	42	Putative deoxyribonuclease YcfH	AKB53059.1	103.383	13.5174	106.356	22.203	155.236	14.5461	143.095	9.08912	112.117	12.8784	110.555	19.4375	113.581	24.6029	152.525	55.2326
2-isopropylmalate synthase] [protein_id=AKB53060.1	43	2-isopropylmalate synthase	AKB53060.1	2598.21	539.277	1929.68	59.9954	2570.87	180.526	2582.87	205.312	2363.47	243.825	1989.97	37.158	2366.04	289.358	2496.47	137.659
Bacterioferritin] [protein_id=AKB53061.1	44	Bacterioferritin	AKB53061.1	5.85087	3.86475	25.8034	18.787	23.0735	12.8704	15.5178	5.80521	29.9884	8.41461	28.5426	16.1272	18.0051	2.82944	34.471	13.4392
hypothetical protein] [protein_id=AKB53062.1	45	hypothetical protein	AKB53062.1	3.10173	3.32298	1.62708	2.81819	1.92208	1.99515	0.823575	0.936999	2.21716	1.50447	0.641644	0.55569	5.42835	4.54307	8.75281	1.11641
hypothetical protein] [protein_id=AKB53063.1	46	hypothetical protein	AKB53063.1	7.15798	0.834354	7.74871	5.99527	9.58254	2.2977	6.72189	1.33252	8.97054	3.99792	6.69459	1.74115	6.90833	3.57553	8.51064	5.29717
Endonuclease III] [protein_id=AKB53064.1	47	Endonuclease III	AKB53064.1	37.8129	9.90822	50.5736	16.5461	48.0556	18.3517	37.2339	8.4544	46.3033	9.69781	64.5977	7.4699	63.602	17.409	56.2968	19.4604
Formaldehyde activating enzyme] [protein_id=AKB53065.1	48	Formaldehyde activating enzyme	AKB53065.1	1043.39	87.8222	1175.08	158.684	1045.98	32.7359	1018.4	16.1748	1181.8	62.6509	1484.26	125.7	1341.8	231.022	1223.25	34.7717
Triosephosphate isomerase] [protein_id=AKB53066.1	49	Triosephosphate isomerase	AKB53066.1	146.351	16.8751	224.781	63.3537	221.285	7.96855	231.541	12.2235	194.703	27.362	262.759	31.2815	246.758	11.8849	256.605	21.3716
hypothetical protein] [protein_id=AKB53067.1	50	hypothetical protein	AKB53067.1	182.027	7.27747	200.863	45.7089	147.626	17.9167	166.167	24.8566	191.712	43.2274	158.17	29.0639	212.927	21.1604	201.611	11.7479
hypothetical protein] [protein_id=AKB53068.1	51	hypothetical protein	AKB53068.1	16.5027	10.2491	18.5863	4.43197	21.5212	9.16065	19.0854	6.10378	21.9531	11.6886	15.8121	2.25234	26.473	7.30862	29.3598	2.42686
Prephenate and/or arogenate dehydrogenase (unknown specificity)] [protein_id=AKB53069.1	52	Prephenate and/or arogenate dehydrogenase (unknown specificity)	AKB53069.1	77.617	19.7382	103.336	26.3948	70.9743	14.9139	93.9462	4.85458	86.5752	21.353	80.1183	5.4555	69.4591	23.1397	81.1358	6.7442
Shikimate 5-dehydrogenase I alpha] [protein_id=AKB53070.1	53	Shikimate 5-dehydrogenase I alpha	AKB53070.1	84.3501	4.23361	92.3045	34.3115	65.7307	6.67522	83.8032	25.4003	87.9074	21.8561	78.7304	20.7652	82.2611	20.1822	75.9702	12.1338
3-dehydroquinate dehydratase I] [protein_id=AKB53071.1	54	3-dehydroquinate dehydratase I	AKB53071.1	102.398	41.2039	160.004	73.5551	81.6241	18.9677	122.193	30.4271	137.046	5.38058	133.1	35.5198	108.87	53.6092	99.9206	28.3681
3,7-dideoxy-D-threo-hepto-2, 6-diulosonate synthase] [protein_id=AKB53072.1	55	3,7-dideoxy-D-threo-hepto-2, 6-diulosonate synthase	AKB53072.1	218.213	66.7806	224.402	91.898	163.621	19.9685	255.071	79.7596	287.877	24.8196	185.407	63.0083	261.667	16.0718	216.054	42.3382
2-amino-3,7-dideoxy-D-threo-hept-6-ulosonate synthase] [protein_id=AKB53073.1	56	2-amino-3,7-dideoxy-D-threo-hept-6-ulosonate synthase	AKB53073.1	160.807	65.3071	142.183	56.0422	100.898	30.1409	145.314	30.363	225.19	9.21984	125.046	45.1384	157.796	35.3695	117.956	13.9599
GMP synthase (glutamine-hydrolyzing), amidotransferase subunit] [protein_id=AKB53074.1	57	GMP synthase (glutamine-hydrolyzing), amidotransferase subunit	AKB53074.1	75.7087	14.6862	60.5369	6.07497	57.7014	9.20698	67.6498	18.0273	77.0744	6.61392	76.6772	9.82774	94.5194	17.1435	77.5338	22.4738
Signal recognition particle, subunit Ffh SRP54] [protein_id=AKB53075.1	58	Signal recognition particle, subunit Ffh SRP54	AKB53075.1	292.306	67.6117	253.23	58.0161	327.266	12.403	336.427	84.9492	370.418	54.7373	230.955	42.0695	455.787	203.897	454.555	61.2652
hypothetical protein] [protein_id=AKB53076.1	59	hypothetical protein	AKB53076.1	17.6202	3.18096	29.9103	2.43767	14.8594	4.13872	27.1144	13.7495	16.9898	4.22565	20.9484	9.28332	17.6553	3.19201	24.2426	6.214
hypothetical protein] [protein_id=AKB53077.1	60	hypothetical protein	AKB53077.1	274.758	76.2928	157.28	44.7728	100.551	9.82575	166.593	4.79048	208.292	47.6527	114.778	9.12218	222.05	102.236	230.187	21.8594
Methionyl-tRNA formyltransferase] [protein_id=AKB53078.1	61	Methionyl-tRNA formyltransferase	AKB53078.1	33.6063	18.3281	25.4162	8.37877	44.554	6.50346	38.9308	15.1084	29.8437	7.08844	29.3795	4.60087	24.8633	3.38983	30.6869	12.1434
Transcriptional regulator, ArsR family] [protein_id=AKB53079.1	62	Transcriptional regulator, ArsR family	AKB53079.1	29.16	12.6476	33.4877	8.70287	38.3252	4.12869	30.8157	6.08148	36.5072	3.58218	34.7908	4.02172	23.5219	13.8038	31.674	20.4778
Xanthine-guanine phosphoribosyltransferase] [protein_id=AKB53080.1	63	Xanthine-guanine phosphoribosyltransferase	AKB53080.1	33.5912	5.20633	27.7649	8.91549	30.3223	9.52794	29.1961	4.36221	26.512	5.27186	20.3775	5.65435	26.409	12.9819	30.2219	8.49816
Zn-ribbon containing protein] [protein_id=AKB53081.1	64	Zn-ribbon containing protein	AKB53081.1	17.7454	4.83294	11.8776	8.89728	8.19811	3.87692	11.6416	4.40028	12.7206	2.23016	6.94356	2.89797	11.3958	9.26776	18.3374	6.37185
hypothetical protein] [protein_id=AKB53082.1	65	hypothetical protein	AKB53082.1	19.7013	11.9418	13.994	5.71407	18.844	3.99515	19.1205	7.75364	16.0619	8.57381	16.7757	3.24849	10.2412	4.62097	22.8648	12.7405
Archaeal heat shock regulator, ArsR family] [protein_id=AKB53083.1	66	Archaeal heat shock regulator, ArsR family	AKB53083.1	417.072	56.4946	324.749	108.014	307.559	51.0468	293.512	26.4737	367.932	49.795	235.975	29.7071	436.038	173.41	611.628	105.348
Cell division protein FtsH] [protein_id=AKB53084.1	67	Cell division protein FtsH	AKB53084.1	878.083	30.6114	1184.76	248.438	872.186	39.4025	745.417	14.0383	1344.88	53.66	934.841	36.5499	1541.07	533.255	1798.12	311.918
putative heat shock protein] [protein_id=AKB53085.1	68	putative heat shock protein	AKB53085.1	273.004	81.3451	405.523	43.8334	345.432	12.5505	358.299	48.2997	392.883	24.9984	392.701	34.221	458.479	55.2873	449.944	88.9527
putative heat shock protein] [protein_id=AKB53086.1	69	putative heat shock protein	AKB53086.1	354.837	30.364	391.754	44.7644	408.107	76.5815	331.525	38.2439	407.94	23.5218	380.043	39.0396	393.796	31.724	465.029	63.1491
Cation transporter] [protein_id=AKB53087.1	70	Cation transporter	AKB53087.1	891.032	154.942	1161.99	265.331	725.003	50.6547	783.748	14.7264	695.088	225.999	1359.43	89.6235	833.17	381.515	733.752	116.152
Cation transporter] [protein_id=AKB53088.1	71	Cation transporter	AKB53088.1	858.766	147.051	1111.3	213.905	709.337	32.3447	759.334	11.6265	678.533	217.063	1251.47	79.9891	809.463	319.037	760.542	124.929
Cation transporter] [protein_id=AKB53089.1	72	Cation transporter	AKB53089.1	238.618	28.6001	323.077	26.5368	281.245	28.2223	283.683	27.014	257.224	52.8107	300.334	20.4444	316.387	45.8033	393.013	81.6148
Ribulose-1,5-bisphosphate carboxylase, Type III] [protein_id=AKB53090.1	73	Ribulose-1,5-bisphosphate carboxylase, Type III	AKB53090.1	147.378	15.5537	149.459	17.5768	119.318	10.9739	135.219	21.0393	192.214	38.0154	154.292	29.5198	174.042	12.0819	151.032	17.5977
tRNA(ANN) t(6)A37 threonylcarbamoyladenosine modification protein] [protein_id=AKB53091.1	74	tRNA(ANN) t(6)A37 threonylcarbamoyladenosine modification protein	AKB53091.1	75.3938	23.0812	100.734	14.579	91.71	4.6793	84.5087	17.8691	103.726	29.5357	96.8111	6.82415	103.083	12.9449	104.082	12.0447
hypothetical protein] [protein_id=AKB53092.1	75	hypothetical protein	AKB53092.1	10.4664	8.48448	8.82191	4.47034	7.78044	2.77975	8.26145	0.944138	6.34289	4.14845	12.5861	4.74162	6.19936	5.51128	4.65577	2.5972
Archaeal DNA polymerase II large subunit] [protein_id=AKB53093.1	76	Archaeal DNA polymerase II large subunit	AKB53093.1	160.883	31.3516	157.98	17.3505	159.985	12.7072	160.484	11.6987	165.242	42.0987	174.822	4.25043	165.801	15.8285	171.846	23.0087
Methyl coenzyme M reductase associated protein / Fe-S oxidoreductase, related to NifB/MoaA family] [protein_id=AKB53094.1	77	Methyl coenzyme M reductase associated protein / Fe-S oxidoreductase, related to NifB/MoaA family	AKB53094.1	210.767	40.4945	233.493	23.5796	253.62	16.256	253.307	35.8528	246.814	19.4741	215.648	38.3801	230.007	43.3193	287.918	25.7564
Methyl coenzyme M reductase beta subunit] [protein_id=AKB53095.1	78	Methyl coenzyme M reductase beta subunit	AKB53095.1	5713.72	604.69	6635.97	1224.73	4301.2	316.099	5150.15	611.632	6990.85	1166.62	6295.53	1014.11	6956.91	259.894	5857.34	1072.11
Methyl coenzyme M reductase operon protein D] [protein_id=AKB53096.1	79	Methyl coenzyme M reductase operon protein D	AKB53096.1	2168.9	244.404	3115.86	140.736	2239.35	290.231	2231.25	59.1227	3023.54	578.127	3154.28	142.04	2573.39	368.737	2316.14	19.2493
Methyl coenzyme M reductase operon protein C] [protein_id=AKB53097.1	80	Methyl coenzyme M reductase operon protein C	AKB53097.1	2032.59	375.751	2679.02	470.222	1980.09	176.29	2035.98	304.405	2851.93	241.638	2499.34	309.593	3116.03	472.056	2560.51	501.961
Methyl coenzyme M reductase gamma subunit] [protein_id=AKB53098.1	81	Methyl coenzyme M reductase gamma subunit	AKB53098.1	3820.6	404.838	4847.61	1128.02	2894.55	284.712	3650.53	583.663	4801.2	749.229	4778.14	1076.94	4829.61	734.194	3691.27	612.827
Methyl coenzyme M reductase alpha subunit] [protein_id=AKB53099.1	82	Methyl coenzyme M reductase alpha subunit	AKB53099.1	7527.56	1595.69	9141.32	1935.52	5589.12	609.102	7417.63	1408.7	10427.7	2490.87	8854.23	1803.47	9144.47	1306.17	7369.18	1188.99
RNA methyltransferase related protein] [protein_id=AKB53100.1	83	RNA methyltransferase related protein	AKB53100.1	25.1593	19.4636	33.0033	1.28874	26.0136	2.82415	22.1685	9.65344	24.3882	6.05413	30.1224	5.55114	19.0018	4.54614	18.1074	3.16634
5-Enolpyruvylshikimate-3-phosphate synthase] [protein_id=AKB53101.1	84	5-Enolpyruvylshikimate-3-phosphate synthase	AKB53101.1	34.4254	6.7756	32.1269	7.80883	30.6921	0.626437	29.6476	15.2786	40.7164	7.8579	30.8042	6.88702	47.8192	12.8937	41.0314	11.8834
Thymidylate synthase] [protein_id=AKB53102.1	85	Thymidylate synthase	AKB53102.1	55.4824	10.9311	74.0184	16.5036	62.3769	5.87236	65.0957	12.2612	68.7507	6.19544	65.543	17.6868	70.2264	15.4242	80.0013	16.0402
Peptidase M48, Ste24p precursor] [protein_id=AKB53103.1	86	Peptidase M48, Ste24p precursor	AKB53103.1	501.812	231.367	342.766	147.867	178.447	14.3446	242.533	34.5933	519.931	11.0322	182.694	8.71672	443.369	220.689	454.559	107.878
Mrr restriction system protein] [protein_id=AKB53104.1	87	Mrr restriction system protein	AKB53104.1	23.1409	4.697	10.2816	8.10844	20.6486	2.25733	14.7679	3.3016	17.5322	4.93591	15.6798	2.91343	13.386	7.8605	11.8744	5.10594
hypothetical protein] [protein_id=AKB53105.1	88	hypothetical protein	AKB53105.1	5.84986	4.47097	5.40202	2.14865	6.3054	0.816405	6.92989	1.67058	7.70454	6.304	5.99002	2.89339	6.03014	4.35351	2.05622	2.46765
Carbon-nitrogen hydrolase] [protein_id=AKB53106.1	89	Carbon-nitrogen hydrolase	AKB53106.1	90.2978	10.6551	107.266	34.4181	168.585	53.6354	182.523	25.7028	77.6836	14.2758	123.732	20.5066	81.999	30.1549	110.454	48.7056
Aspartyl-tRNA(Asn) amidotransferase subunit B / Glutamyl-tRNA(Gln) amidotransferase subunit B] [protein_id=AKB53107.1	90	Aspartyl-tRNA(Asn) amidotransferase subunit B / Glutamyl-tRNA(Gln) amidotransferase subunit B	AKB53107.1	318.342	56.425	364.141	17.4288	348.991	46.3052	483.884	59.9456	357.49	34.7713	379.157	25.4804	412.115	52.741	378.161	3.3227
Aspartyl-tRNA(Asn) amidotransferase subunit A / Glutamyl-tRNA(Gln) amidotransferase subunit A] [protein_id=AKB53108.1	91	Aspartyl-tRNA(Asn) amidotransferase subunit A / Glutamyl-tRNA(Gln) amidotransferase subunit A	AKB53108.1	265.424	25.902	265.165	5.07066	268.404	31.0833	256.512	34.55	249.433	23.9323	295.314	25.2892	322.875	17.0946	317.607	27.652
Aspartyl-tRNA(Asn) amidotransferase subunit C / Glutamyl-tRNA(Gln) amidotransferase subunit C] [protein_id=AKB53109.1	92	Aspartyl-tRNA(Asn) amidotransferase subunit C / Glutamyl-tRNA(Gln) amidotransferase subunit C	AKB53109.1	64.462	31.2208	69.0962	29.0273	71.6483	9.96262	95.651	18.6789	71.4859	4.35893	66.4096	14.317	125.33	52.964	89.57	27.8265
Coenzyme F420 hydrogenase subunit beta] [protein_id=AKB53110.1	93	Coenzyme F420 hydrogenase subunit beta	AKB53110.1	11.5793	7.09234	14.0621	6.16955	22.3247	9.27326	9.50102	1.88752	20.8639	1.99229	12.282	5.12374	23.9688	5.9328	23.0714	4.48887
YHS domain protein] [protein_id=AKB53111.1	94	YHS domain protein	AKB53111.1	0	0	0.749004	1.05398	2.35818	0.563991	1.13445	1.45557	1.11012	1.22727	0.41955	0.495263	1.02173	1.00464	2.25259	0.220714
DNA primase large subunit] [protein_id=AKB53112.1	95	DNA primase large subunit	AKB53112.1	81.8834	24.099	87.0635	2.14826	117.204	29.2702	88.7951	16.3436	99.1576	20.8262	84.2865	8.58579	107.186	15.8179	133.92	19.6962
DNA polymerase sliding clamp protein PCNA] [protein_id=AKB53113.1	96	DNA polymerase sliding clamp protein PCNA	AKB53113.1	435.841	78.1606	574.29	33.968	570.126	30.0365	619.458	50.1478	557.018	93.2481	545.11	63.2399	519.729	40.6837	613.16	63.449
hypothetical protein] [protein_id=AKB53114.1	97	hypothetical protein	AKB53114.1	46.052	22.0973	31.342	9.90179	31.1954	4.67003	23.6353	1.50065	36.0232	7.33636	34.2951	6.14385	34.4143	13.0927	42.8636	6.75824
Transcription factor S] [protein_id=AKB53115.1	98	Transcription factor S	AKB53115.1	167.904	52.2503	155.805	6.5362	165.966	40.4921	169.234	13.304	217.833	37.0406	171.662	13.9548	194.135	38.1952	185.674	25.0313
ADP-ribose pyrophosphatase] [protein_id=AKB53116.1	99	ADP-ribose pyrophosphatase	AKB53116.1	298.671	99.0703	385.975	12.0827	444.375	122.416	567.204	137.988	430.19	39.069	349.508	49.8141	429.253	91.8938	500.608	108.862
archaeosortase A] [protein_id=AKB53117.1	100	archaeosortase A	AKB53117.1	108.253	8.5089	137.24	46.1439	127.698	26.7471	124.879	16.8273	115.744	10.6919	162.423	30.6504	118.692	44.9057	121.46	18.1278
Phosphatidylserine decarboxylase] [protein_id=AKB53118.1	101	Phosphatidylserine decarboxylase	AKB53118.1	48.621	23.6571	36.4174	12.4811	49.2917	12.8478	50.9968	3.79142	43.9478	3.69977	47.0244	7.28763	38.3671	15.6768	36.1804	5.40196
CDP-diacylglycerol--serine O-phosphatidyltransferase] [protein_id=AKB53119.1	102	CDP-diacylglycerol--serine O-phosphatidyltransferase	AKB53119.1	63.9071	22.8084	48.5869	15.0154	58.0673	11.5727	72.0171	26.6367	45.5291	26.9596	61.3439	3.60472	64.2058	14.5084	60.3261	9.02656
Dihydroneopterin aldolase] [protein_id=AKB53120.1	103	Dihydroneopterin aldolase	AKB53120.1	10.0708	7.45154	13.8666	3.92669	9.15891	3.73227	11.8147	6.34578	8.07295	2.68924	11.4643	1.81538	9.79299	2.80737	7.61508	2.29076
Aspartate aminotransferase / Histidinol-phosphate aminotransferase] [protein_id=AKB53121.1	104	Aspartate aminotransferase / Histidinol-phosphate aminotransferase	AKB53121.1	125.95	16.0477	168.135	11.972	145.581	12.9536	134.115	25.1784	154.394	6.47319	185.135	10.422	159.479	32.3259	157.352	28.3597
Acetylornithine aminotransferase] [protein_id=AKB53122.1	105	Acetylornithine aminotransferase	AKB53122.1	307.157	61.0228	383.638	24.6801	382.665	14.645	311.753	31.0478	387.934	25.6215	420.11	18.4417	438.91	22.1329	421.412	21.7525
hypothetical protein] [protein_id=AKB53123.1	106	hypothetical protein	AKB53123.1	120.571	24.5489	98.2957	6.69966	116.404	15.9393	121.709	17.2328	117.041	19.0272	106.298	14.2662	125.756	21.9046	129.287	24.0945
tRNA-guanine(15) transglycosylase] [protein_id=AKB53124.1	107	tRNA-guanine(15) transglycosylase	AKB53124.1	30.8201	19.9104	28.9313	7.83109	36.5157	12.7335	32.7458	1.62652	37.5338	12.8639	40.2405	4.20997	30.4785	9.17637	37.0407	16.5976
hypothetical protein] [protein_id=AKB53125.1	108	hypothetical protein	AKB53125.1	4.71238	4.68487	2.53856	2.36674	7.83321	0.378655	6.18843	2.7964	6.39161	2.29482	3.79923	3.44309	7.50504	3.21893	8.13658	4.25721
hypothetical protein] [protein_id=AKB53126.1	109	hypothetical protein	AKB53126.1	93.0682	24.7362	49.4662	14.1009	42.6463	10.0879	37.8676	13.4133	58.6473	6.86667	62.1521	15.018	67.9636	12.0136	47.9362	19.9196
hypothetical protein] [protein_id=AKB53127.1	110	hypothetical protein	AKB53127.1	7.15551	1.80838	10.3181	3.08515	12.8448	2.18634	8.67251	4.64494	7.55673	2.78497	14.3783	6.70887	14.1526	7.85898	9.98315	6.16593
hypothetical protein] [protein_id=AKB53128.1	111	hypothetical protein	AKB53128.1	55.9706	17.5825	70.5561	16.2771	66.5113	9.09217	74.0383	21.3319	55.4745	11.5713	87.2449	5.80346	67.6125	22.9673	64.9324	16.5196
hypothetical protein] [protein_id=AKB53129.1	112	hypothetical protein	AKB53129.1	36.4659	5.18551	33.914	1.99336	41.437	10.5549	48.5802	9.21346	24.6522	2.07487	40.0357	16.588	32.3646	6.78281	30.8237	2.83534
hypothetical protein] [protein_id=AKB53130.1	113	hypothetical protein	AKB53130.1	1.64949	2.85699	2.31167	2.45334	2.04007	1.41978	5.91167	3.81767	3.89972	1.33643	1.64446	0.591323	20.263	16.2317	14.036	10.9868
hypothetical protein] [protein_id=AKB53131.1	114	hypothetical protein	AKB53131.1	10.3594	5.67227	10.5131	1.33518	12.4614	3.91743	7.63005	2.17309	7.58716	2.03183	11.675	5.70986	65.3176	56.2004	62.6274	56.212
Phosphoribosylformylglycinamidine cyclo-ligase] [protein_id=AKB53132.1	115	Phosphoribosylformylglycinamidine cyclo-ligase	AKB53132.1	202.703	31.3416	253.347	30.9089	198.642	44.6498	199.434	18.1764	301.135	8.10648	241.437	25.0819	292.692	22.0404	291.462	12.3312
Aspartokinase] [protein_id=AKB53133.1	116	Aspartokinase	AKB53133.1	486.509	199.163	539.548	112.228	408.862	50.6571	471.652	73.2694	743.147	124.24	428.709	32.557	775.766	284.887	708.119	124.98
hypothetical protein] [protein_id=AKB53134.1	117	hypothetical protein	AKB53134.1	166.674	27.1682	155.892	23.9082	131.104	9.32447	142.525	7.07874	128.848	11.4285	185.324	15.2987	139.32	31.3531	153.241	35.5617
Small heat shock protein HSP16.5] [protein_id=AKB53135.1	118	Small heat shock protein HSP16.5	AKB53135.1	239.114	88.9898	224.461	58.0416	194.203	26.6164	264.053	52.3911	236.722	11.2222	169.337	10.8134	224.771	40.9893	213.771	17.642
Cobalt-zinc-cadmium resistance protein] [protein_id=AKB53136.1	119	Cobalt-zinc-cadmium resistance protein	AKB53136.1	95.7315	7.65196	66.7626	18.1523	74.2061	3.98626	70.7044	10.5473	74.2138	13.9215	49.0405	3.52519	69.1057	22.776	94.8839	8.68053
hypothetical protein] [protein_id=AKB53137.1	120	hypothetical protein	AKB53137.1	6.1965	5.48676	3.58074	3.42864	4.12245	4.26243	5.77961	4.62582	4.45397	1.02706	3.5279	3.09006	9.14047	3.03751	4.54512	4.8032
Coenzyme F420:L-glutamate ligase] [protein_id=AKB53138.1	121	Coenzyme F420:L-glutamate ligase	AKB53138.1	37.8917	6.55569	50.7137	22.7422	53.9428	13.687	39.2887	8.9958	54.0177	2.77475	53.7673	4.8209	68.1824	11.0875	66.8508	7.44425
Mobile element protein] [protein_id=AKB53139.1	122	Mobile element protein	AKB53139.1	0	0	0.650832	1.12727	0.297198	0.514762	0	0	0	0	0.639368	1.10742	2.313	2.53363	1.67363	2.89881
dCMP deaminase] [protein_id=AKB53140.1	123	dCMP deaminase	AKB53140.1	54.6346	8.53245	41.9543	2.65356	33.7727	15.472	29.3581	9.38775	48.2295	8.51729	43.4542	4.11533	51.9876	7.62859	55.2169	26.4905
Protein-export membrane protein SecF] [protein_id=AKB53141.1	124	Protein-export membrane protein SecF	AKB53141.1	656.475	47.2506	682.555	84.3742	621.928	54.1606	594.566	80.0614	623.335	93.0653	744.875	3.19958	733.923	23.1754	810.533	128.115
Protein-export membrane protein SecD] [protein_id=AKB53142.1	125	Protein-export membrane protein SecD	AKB53142.1	1290.87	45.622	1683.21	273.637	1452.4	19.8433	1487.94	19.2937	1541.54	75.181	1820.18	141.67	1623.53	164.556	1705.85	226.319
Replication factor C small subunit] [protein_id=AKB53143.1	126	Replication factor C small subunit	AKB53143.1	290.261	78.9565	319.543	17.4291	273.01	19.9821	217.755	18.6392	281.517	54.3064	358.545	19.9743	279.142	83.4951	311.939	53.0264
hypothetical protein] [protein_id=AKB53144.1	127	hypothetical protein	AKB53144.1	23.7145	2.64472	27.5306	11.0186	25.0658	3.00097	34.4914	16.9083	16.7395	5.4965	39.8196	4.77836	22.23	19.7862	24.076	12.4094
Monomethylamine permease] [protein_id=AKB53145.1	128	Monomethylamine permease	AKB53145.1	9.67909	4.61026	22.2591	8.61675	26.9739	6.49658	15.5589	4.44291	6.81624	2.15434	24.012	6.64801	15.5241	7.19805	16.4328	2.03313
Monomethylamine permease] [protein_id=AKB53146.1	129	Monomethylamine permease	AKB53146.1	15.8297	2.88085	29.7769	12.7113	33.5242	2.84535	48.2332	12.4173	20.5096	2.52146	35.5703	9.93212	45.8929	1.50046	34.063	10.7651
Monomethylamine permease] [protein_id=AKB53147.1	130	Monomethylamine permease	AKB53147.1	90.6025	30.6289	216.121	72.7096	242.006	33.3546	261.797	28.3062	170.972	31.7547	295.27	2.21771	227.315	59.0959	219.247	34.2876
Monomethylamine:corrinoid methyltransferase] [transl_except=(pos:604..606,aa:Pyl)] [protein_id=AKB53148.1	131	Monomethylamine:corrinoid methyltransferase	AKB53148.1	1049.33	219.748	1522.52	260.349	2074.65	65.9424	2065.47	129.49	1401.46	328.937	1953.95	122.19	2138.46	180.176	1907.91	199.725
Monomethylamine methyltransferase corrinoid protein] [protein_id=AKB53149.1	132	Monomethylamine methyltransferase corrinoid protein	AKB53149.1	413.835	70.7928	488.407	111.978	857.442	99.1668	839.243	20.7234	443.241	106.547	671.434	65.774	683.477	27.6286	632.07	54.3006
Methylcobalamin:coenzyme M methyltransferase, methylamine-specific] [protein_id=AKB53150.1	133	Methylcobalamin:coenzyme M methyltransferase, methylamine-specific	AKB53150.1	776.71	214.631	1189.28	84.6206	1021.22	19.2685	1044.17	68.3897	1303.23	276.214	1444.41	160.252	1753.81	274.459	1511.18	204.766
hypothetical protein] [protein_id=AKB53151.1	134	hypothetical protein	AKB53151.1	88.0253	33.3716	56.6343	11.1036	55.3208	7.08906	68.7087	20.1818	62.6957	15.4102	63.5023	8.11921	53.6343	6.49108	65.3543	23.9303
NADH-plastoquinone oxidoreductase subunit] [protein_id=AKB53152.1	135	NADH-plastoquinone oxidoreductase subunit	AKB53152.1	280.239	16.2961	401.795	29.9583	422.416	19.027	380.882	70.9273	436.854	50.3427	369.575	14.0873	382.601	15.342	359.295	39.4777
Pyrrolysyl-tRNA synthetase] [protein_id=AKB53153.1	136	Pyrrolysyl-tRNA synthetase	AKB53153.1	941.563	144.865	844.6	164.376	1510.27	67.5841	1481.34	70.9645	990.878	9.49992	990.339	35.6938	953.354	40.652	965.383	70.4245
Proline 2-methylase for pyrrolysine biosynthesis] [protein_id=AKB53154.1	137	Proline 2-methylase for pyrrolysine biosynthesis	AKB53154.1	265.924	32.8969	288.13	67.2229	446.428	6.15288	412.444	19.2322	251.265	5.53394	358.211	12.9555	311.199	29.2083	325.641	23.6261
Pyrrolysine synthetase] [protein_id=AKB53155.1	138	Pyrrolysine synthetase	AKB53155.1	100.988	24.7174	109.349	32.2045	137.538	8.05316	144.463	14.9899	112.923	11.3799	156.283	10.3863	139.691	13.6386	123.238	19.859
Proline reductase for pyrrolysine biosynthesis] [protein_id=AKB53156.1	139	Proline reductase for pyrrolysine biosynthesis	AKB53156.1	49.658	12.5193	72.7324	30.3313	98.7049	3.70218	91.7181	20.8613	62.3256	3.66131	119.023	11.4022	81.7357	41.4095	65.9472	18.2806
hypothetical protein] [protein_id=AKB53157.1	140	hypothetical protein	AKB53157.1	6.91139	7.44526	11.3599	2.07991	19.7575	5.48513	9.48767	2.98043	10.0958	3.47512	9.00437	3.92208	7.46432	2.91109	13.5634	6.25773
Transcriptional regulator, TetR family] [protein_id=AKB53158.1	141	Transcriptional regulator, TetR family	AKB53158.1	29.1258	4.86605	14.3194	5.37004	19.2955	1.91886	16.3463	4.41778	21.1832	7.76165	15.1727	4.60855	18.5304	5.83192	24.9184	5.06265
hypothetical protein] [protein_id=AKB53159.1	142	hypothetical protein	AKB53159.1	12.7357	6.1128	16.3413	7.83443	18.1893	4.48255	13.3238	6.16409	16.9761	2.88473	16.1937	6.80342	11.8816	4.50442	17.7536	1.93556
hypothetical protein] [protein_id=AKB53160.1	143	hypothetical protein	AKB53160.1	4947.69	695.583	4464.8	646.215	4614.75	115.552	4570.89	612.678	3421.53	247.198	4551.71	380.128	3928.08	387.695	4611.54	651.219
hypothetical protein] [protein_id=AKB53161.1	144	hypothetical protein	AKB53161.1	6.36367	1.96769	1.4965	1.81348	8.41914	1.47605	7.66764	3.79917	2.77741	1.35713	4.05279	2.43604	5.6026	4.10468	10.0012	0.838412
hypothetical protein] [protein_id=AKB53162.1	145	hypothetical protein	AKB53162.1	7.79172	5.6116	3.90517	1.68896	7.46432	2.26994	2.8966	2.78356	6.28783	2.74834	7.40464	1.41583	6.54101	3.92933	6.57469	4.24549
hypothetical protein] [protein_id=AKB53163.1	146	hypothetical protein	AKB53163.1	67.5731	21.2001	46.7358	11.2783	59.3417	5.83627	62.7086	9.76379	81.7243	12.5033	52.7522	5.96442	71.1492	16.7743	80.9458	6.81248
hypothetical protein] [protein_id=AKB53164.1	147	hypothetical protein	AKB53164.1	37.6898	20.0452	32.9741	10.6013	34.8778	14.3604	50.982	17.7813	45.2521	6.52802	27.4479	8.08559	60.3971	20.772	61.6155	22.8288
hypothetical protein] [protein_id=AKB53165.1	148	hypothetical protein	AKB53165.1	20.5632	19.1195	25.975	11.51	21.6049	1.73073	28.6351	4.2619	18.2205	5.26823	18.9318	5.34413	16.8925	2.60449	12.0899	6.98262
Fe-S oxidoreductase] [protein_id=AKB53166.1	149	Fe-S oxidoreductase	AKB53166.1	59.2554	3.59794	47.6858	12.1392	45.3714	8.93559	50.3982	0.934361	54.1766	4.69023	39.4415	7.52538	51.7443	7.3811	62.2684	2.45883
Ferritin-like protein 2] [protein_id=AKB53167.1	150	Ferritin-like protein 2	AKB53167.1	19.0392	0.293718	20.8967	4.93762	27.2701	2.70722	27.9604	12.7113	21.7513	7.82642	15.8896	5.5705	22.3654	10.399	24.663	6.79897
Universal stress protein] [protein_id=AKB53168.1	151	Universal stress protein	AKB53168.1	19.7331	2.09929	15.8791	9.56076	21.7941	5.30797	18.1001	4.67797	13.692	7.4787	15.4363	5.91763	11.8189	3.61211	14.5979	1.14657
Universal stress protein] [protein_id=AKB53169.1	152	Universal stress protein	AKB53169.1	574.643	171.968	836.814	154.152	551.801	49.6875	758.626	50.7377	590.936	104.144	741.788	74.7076	721.659	82.9889	544.059	92.3288
hypothetical protein] [protein_id=AKB53170.1	153	hypothetical protein	AKB53170.1	29.606	10.0321	24.9321	10.527	19.7924	3.07553	19.672	6.72089	26.3806	5.9585	22.0771	5.94776	31.796	5.12654	33.2051	2.53255
hypothetical protein] [protein_id=AKB53171.1	154	hypothetical protein	AKB53171.1	6.19259	4.91167	3.64412	3.08748	5.01754	1.94464	3.63311	2.67836	2.32404	1.37667	2.34216	4.05675	0.352283	0.610171	2.02269	3.5034
hypothetical protein] [protein_id=AKB53172.1	155	hypothetical protein	AKB53172.1	1.57956	2.06326	0.846013	1.00197	1.10018	0.96201	1.5408	1.9266	0.647471	1.12145	3.08144	2.21115	1.9507	2.5195	0.812589	1.40745
hypothetical protein] [protein_id=AKB53173.1	156	hypothetical protein	AKB53173.1	41.4666	15.4552	50.122	10.7023	53.099	11.7215	50.7952	11.6402	58.1605	7.224	50.5797	7.04539	55.5537	9.5518	63.8143	24.2592
hypothetical protein] [protein_id=AKB53174.1	157	hypothetical protein	AKB53174.1	161.118	33.658	193.635	35.0992	165.329	22.6637	197.083	9.02942	190.918	7.33941	171.032	15.7231	230.435	46.9667	228.292	21.0922
hypothetical protein] [protein_id=AKB53175.1	158	hypothetical protein	AKB53175.1	30.6514	5.79341	20.049	0.892502	29.7961	4.96828	19.3975	3.15266	28.6523	7.32071	16.0095	4.39098	25.2093	10.4054	21.3696	10.7115
hypothetical protein] [protein_id=AKB53176.1	159	hypothetical protein	AKB53176.1	9.87849	4.61457	7.35504	1.81017	4.12395	1.90601	7.25658	5.49187	2.59278	1.54278	6.9773	2.8414	7.37402	5.79221	7.00366	6.13775
Lead, cadmium, zinc and mercury transporting ATPase] [protein_id=AKB53177.1	160	Lead, cadmium, zinc and mercury transporting ATPase	AKB53177.1	253.512	19.5718	287.311	38.1462	295.307	63.464	303.161	30.0786	279.647	53.5736	252.167	28.0628	241.397	37.261	217.686	12.7544
hypothetical protein] [protein_id=AKB53178.1	161	hypothetical protein	AKB53178.1	11.0456	3.33391	9.11288	2.45412	14.046	1.33429	10.9355	3.35665	12.5085	3.79392	13.2131	2.77902	7.79967	3.3424	11.5939	5.99451
hypothetical protein] [protein_id=AKB53179.1	162	hypothetical protein	AKB53179.1	5.25315	2.8133	3.67711	2.95489	1.98729	1.89263	3.2896	2.95957	3.09805	1.86768	2.3545	1.21477	3.1611	1.73532	3.83468	1.30438
hypothetical protein] [protein_id=AKB53180.1	163	hypothetical protein	AKB53180.1	96.4746	27.3288	115.954	28.943	135.937	28.4527	135.483	14.8057	73.6887	10.6616	131.063	25.5438	95.0291	23.1491	80.2577	9.57959
Sensory transduction histidine kinase] [protein_id=AKB53181.1	164	Sensory transduction histidine kinase	AKB53181.1	144.242	3.28787	203.571	34.8776	189.34	36.7022	200.521	19.088	154.025	17.3596	195.09	44.6475	136.459	16.5159	144.217	21.4098
Tetracycline resistance protein] [protein_id=AKB53182.1	165	Tetracycline resistance protein	AKB53182.1	25.0674	9.82238	31.1172	7.95997	51.9117	10.8919	57.4427	11.4356	34.5943	12.7704	29.8643	3.56448	37.8902	18.0551	38.8118	10.0151
hypothetical protein] [protein_id=AKB53183.1	166	hypothetical protein	AKB53183.1	6.61061	3.16717	2.08297	0.224473	2.18344	1.33704	3.28466	2.94464	3.62497	1.70895	0.780721	1.35225	1.03929	1.05728	2.18873	1.12812
hypothetical protein] [protein_id=AKB53184.1	167	hypothetical protein	AKB53184.1	19.0686	7.12907	26.8519	5.54597	30.1824	12.1968	25.7905	14.244	18.8212	8.45881	31.7295	5.24951	22.3854	13.1895	17.248	4.33784
Phenylalanyl-tRNA synthetase alpha chain] [protein_id=AKB53185.1	168	Phenylalanyl-tRNA synthetase alpha chain	AKB53185.1	203.807	49.4146	200.589	8.07428	191.821	11.7192	231.649	34.1079	220.572	8.21369	204.048	13.4892	250.472	38.6335	226.694	19.651
Tryptophanyl-tRNA synthetase] [protein_id=AKB53186.1	169	Tryptophanyl-tRNA synthetase	AKB53186.1	145.292	17.0747	122.893	13.5188	156.058	8.05642	169.322	51.9722	187.482	27.3687	122.748	14.7703	164.396	51.2867	165.654	14.876
moaA/nifB/pqqE family protein] [protein_id=AKB53187.1	170	moaA/nifB/pqqE family protein	AKB53187.1	38.6097	11.5659	45.6043	15.1031	64.8297	7.31534	43.0704	2.88599	64.3521	6.02707	33.2184	6.46623	57.0699	22.8695	71.2107	21.4675
Eukaryotic translation initiation factor 2 beta subunit] [protein_id=AKB53188.1	171	Eukaryotic translation initiation factor 2 beta subunit	AKB53188.1	631.108	49.8382	564.208	41.9072	672.813	43.4457	621.55	80.7545	721.216	134.393	591.593	52.9462	646.416	64.0565	684.849	45.1713
LSU ribosomal protein L10e (L16p)] [protein_id=AKB53189.1	172	LSU ribosomal protein L10e (L16p)	AKB53189.1	891.068	330.053	1027.97	68.1441	929.887	82.2693	896.554	20.2677	1193.69	169.93	1016.32	54.2273	1466.62	355.073	1397.44	227.75
Uncharacterized protein conserved in archaea] [protein_id=AKB53190.1	173	Uncharacterized protein conserved in archaea	AKB53190.1	27.4465	4.30772	39.4469	5.57492	33.8513	0.817636	47.1361	11.0526	33.5891	2.2996	38.0912	2.21342	40.3711	5.0415	37.1941	7.81721
Putative glycogen debranching enzyme, archaeal type, TIGR01561] [protein_id=AKB53191.1	174	Putative glycogen debranching enzyme, archaeal type, TIGR01561	AKB53191.1	46.7628	12.7142	37.3359	12.3141	57.7516	8.98271	39.192	9.22103	37.7121	11.2931	27.9225	4.19298	41.8484	22.0323	60.7236	17.7488
hypothetical protein] [protein_id=AKB53192.1	175	hypothetical protein	AKB53192.1	32.7876	14.4052	17.449	8.58492	17.9698	1.68572	17.1202	3.58738	19.5157	7.26645	17.2491	4.50379	23.468	7.85408	18.5901	2.90518
Molybdenum cofactor biosynthesis protein MoaB] [protein_id=AKB53193.1	176	Molybdenum cofactor biosynthesis protein MoaB	AKB53193.1	53.0926	13.1036	30.7535	10.4185	44.8035	19.7293	36.4358	11.9649	39.5779	6.75853	40.789	4.69882	43.3429	7.86404	35.9186	16.3478
hypothetical protein] [protein_id=AKB53194.1	177	hypothetical protein	AKB53194.1	70.3233	17.7361	107.632	5.74323	102.854	24.7637	105.719	18.2848	66.09	11.5111	83.1609	30.8661	90.5602	15.6008	106.983	12.864
hypothetical protein] [protein_id=AKB53195.1	178	hypothetical protein	AKB53195.1	37.1284	1.74934	29.6796	11.726	34.6638	11.1702	52.2836	9.32694	40.0098	0.786627	32.6024	2.5962	46.7598	11.0631	55.4196	17.9383
hypothetical protein] [protein_id=AKB53196.1	179	hypothetical protein	AKB53196.1	26.159	12.5798	18.7847	12.8084	17.2888	7.48741	16.9681	5.31107	17.1748	0.870906	12.8173	6.43629	14.7243	9.91111	14.6389	2.12097
Cob(I)alamin adenosyltransferase] [protein_id=AKB53197.1	180	Cob(I)alamin adenosyltransferase	AKB53197.1	19.3974	2.8203	21.677	3.61872	28.6332	0.990363	18.7748	2.83821	20.377	6.124	17.2691	4.33922	26.9036	5.53963	29.1975	6.32329
FeoA domain protein] [protein_id=AKB53198.1	181	FeoA domain protein	AKB53198.1	37.1539	2.22458	11.7836	4.14936	15.198	5.51288	14.2179	9.4431	18.7199	4.11899	8.11923	1.37185	14.8183	8.41965	17.7972	6.36282
Ferrous iron transport protein B] [protein_id=AKB53199.1	182	Ferrous iron transport protein B	AKB53199.1	543.893	59.6085	332.411	109.924	254.475	25.8139	279.774	46.4754	373.199	19.963	234.545	26.2954	361.701	106.595	515.407	53.302
Mannose-6-phosphate isomerase] [protein_id=AKB53200.1	183	Mannose-6-phosphate isomerase	AKB53200.1	4.80122	5.8771	8.46274	2.45847	10.0963	3.23265	8.07151	3.9258	6.04802	3.36853	6.76755	1.66818	10.1271	4.16964	12.4635	2.36113
Transcriptional regulator, ArsR family] [protein_id=AKB53201.1	184	Transcriptional regulator, ArsR family	AKB53201.1	15.7178	3.62574	14.1548	8.03097	25.7538	7.26999	20.087	7.82321	11.4166	3.50051	14.6893	4.24383	11.4786	3.99157	9.11891	4.87758
RNA-binding protein YhbY] [protein_id=AKB53202.1	185	RNA-binding protein YhbY	AKB53202.1	72.3073	11.1283	71.3487	17.8356	45.9255	13.2361	46.3734	1.27896	84.5291	9.42063	72.8174	19.8938	76.9624	4.7773	63.2599	16.4655
Alanyl-tRNA synthetase] [protein_id=AKB53203.1	186	Alanyl-tRNA synthetase	AKB53203.1	940.18	52.5146	1232.13	61.0425	879.473	80.7614	957.012	115.338	1202.23	133.587	1424.54	105.662	1352.35	119.396	1216.21	87.0776
hypothetical protein] [protein_id=AKB53204.1	187	hypothetical protein	AKB53204.1	27.7333	4.5303	34.6289	5.35676	31.5748	7.82457	39.6203	14.587	37.3817	5.52131	29.1574	4.8587	38.6712	9.84951	38.3552	12.0573
hypothetical protein] [protein_id=AKB53205.1	188	hypothetical protein	AKB53205.1	13.4216	11.0434	10.8382	2.47478	11.8183	4.3219	10.5991	4.84985	14.6219	3.59056	15.2165	5.31835	18.1762	4.94289	16.3429	6.67396
DUF324 domain-containing protein] [protein_id=AKB53206.1	189	DUF324 domain-containing protein	AKB53206.1	39.4917	19.7687	32.2248	15.5098	35.8008	1.66996	33.0896	10.3282	24.7879	5.88118	35.7836	2.14287	26.9074	7.57471	25.7614	9.63554
hypothetical protein] [protein_id=AKB53207.1	190	hypothetical protein	AKB53207.1	17.6604	8.89484	12.4993	2.72153	14.5194	4.89356	18.0563	2.7232	10.8883	8.34583	13.9861	5.46126	17.2742	6.02833	19.8497	3.23996
DUF324 domain-containing protein] [protein_id=AKB53208.1	191	DUF324 domain-containing protein	AKB53208.1	43.6379	5.26273	30.3007	2.5858	32.9781	6.20048	39.6005	6.80302	32.2243	4.6048	29.0544	2.82276	35.9187	13.4569	42.5821	10.5098
DUF324 domain-containing protein] [protein_id=AKB53209.1	192	DUF324 domain-containing protein	AKB53209.1	15.7828	4.47315	19.1392	4.40646	17.0549	3.11026	12.0563	6.3978	13.1221	4.36053	20.2352	0.889135	17.7964	4.09779	22.2151	4.70734
DUF324 domain-containing protein] [protein_id=AKB53210.1	193	DUF324 domain-containing protein	AKB53210.1	6.08941	5.4432	5.04541	4.37653	2.70966	3.9009	4.66839	3.3927	5.88474	0.50182	4.04955	3.72143	4.28063	3.75671	6.49063	2.20821
CRISPR-associated protein Cas10/Cmr2, subtype III-B] [protein_id=AKB53211.1	194	CRISPR-associated protein Cas10/Cmr2, subtype III-B	AKB53211.1	30.6885	9.39912	18.7484	9.47527	26.3008	4.12409	23.5819	8.91748	24.2462	6.41504	20.8284	3.94028	20.441	2.91929	28.3901	10.0824
hypothetical protein] [protein_id=AKB53212.1	195	hypothetical protein	AKB53212.1	22.4106	7.76719	32.3803	10.5011	27.6469	7.65657	37.2809	14.0972	20.954	4.86195	28.5887	12.0187	20.9494	0.80149	21.8341	10.6292
hypothetical protein] [protein_id=AKB53213.1	196	hypothetical protein	AKB53213.1	4.67636	3.76491	2.31108	0.539357	7.27019	3.03652	10.4468	4.33715	4.40666	3.22589	4.52389	4.38823	5.80385	3.79109	3.46269	4.37507
hypothetical protein] [protein_id=AKB53214.1	197	hypothetical protein	AKB53214.1	4.6673	3.34371	3.0921	1.84823	3.62264	1.62621	4.23287	1.38376	6.38233	3.48833	5.62885	2.61372	4.60346	3.53643	6.23145	3.919
hypothetical protein] [protein_id=AKB53215.1	198	hypothetical protein	AKB53215.1	26.151	8.50764	16.7323	7.69154	18.6215	3.74569	20.1995	8.61025	13.1698	4.02156	13.6673	0.337377	8.94991	3.93734	11.9047	7.20213
hypothetical protein] [protein_id=AKB53216.1	199	hypothetical protein	AKB53216.1	20.8492	1.60873	22.6174	14.0114	17.9748	6.27933	16.1829	5.18107	43.1215	3.70885	22.9988	11.9651	30.6445	5.55805	16.0854	12.1783
Dipeptide-binding ABC transporter, periplasmic substrate-binding component] [protein_id=AKB53217.1	200	Dipeptide-binding ABC transporter, periplasmic substrate-binding component	AKB53217.1	84.5668	35.0274	79.1624	36.6585	46.1062	13.8038	77.9474	24.4388	127.072	9.51179	43.2207	6.59226	91.1231	35.8518	82.3839	35.4662
Dipeptide-binding ABC transporter, periplasmic substrate-binding component] [protein_id=AKB53218.1	201	Dipeptide-binding ABC transporter, periplasmic substrate-binding component	AKB53218.1	242.905	14.3342	324.041	136.363	115.903	4.84681	182.864	13.0547	332.325	40.8031	219.712	44.2423	257.747	6.58709	204.868	45.8911
Dipeptide transport system permease protein DppB] [protein_id=AKB53219.1	202	Dipeptide transport system permease protein DppB	AKB53219.1	72.5959	8.21403	85.5352	6.44789	43.1824	14.8125	55.0122	8.4643	80.1735	7.75135	82.491	8.62739	74.3955	11.2857	55.1942	27.027
Dipeptide transport system permease protein DppC] [protein_id=AKB53220.1	203	Dipeptide transport system permease protein DppC	AKB53220.1	37.5641	14.282	61.9764	15.0335	29.1031	4.90411	34.1103	8.92203	54.6264	25.4939	40.4479	5.4361	28.9684	5.81518	28.047	8.90189
Dipeptide transport ATP-binding protein DppD] [protein_id=AKB53221.1	204	Dipeptide transport ATP-binding protein DppD	AKB53221.1	62.1715	13.9585	65.7206	17.6762	36.7083	4.21627	46.089	11.1032	80.7472	16.4921	57.6322	11.6798	50.9514	7.63004	33.8203	11.2
Dipeptide transport ATP-binding protein DppF] [protein_id=AKB53222.1	205	Dipeptide transport ATP-binding protein DppF	AKB53222.1	12.5867	2.52515	20.475	7.10626	10.8127	3.23614	13.4304	0.872079	16.3535	3.89114	13.5127	5.40259	11.8083	2.7724	13.9647	0.994299
Retron-type RNA-directed DNA polymerase] [protein_id=AKB53223.1	206	Retron-type RNA-directed DNA polymerase	AKB53223.1	48.1888	11.823	50.8049	5.97216	87.0663	9.33296	68.343	11.8669	67.5171	5.66423	46.172	9.99616	51.0386	8.91072	61.0024	14.0276
Chitin binding protein] [protein_id=AKB53224.1	207	Chitin binding protein	AKB53224.1	155.631	19.3016	167.855	29.1285	131.71	6.80474	161.96	8.26159	185.714	26.0138	158.054	21.0863	183.842	32.0785	185.365	30.2618
3-isopropylmalate dehydrogenase] [protein_id=AKB53225.1	208	3-isopropylmalate dehydrogenase	AKB53225.1	449.125	72.9058	373.637	59.5598	318.073	17.7502	366.28	27.7629	537.465	30.8398	359.843	46.0377	501.049	128.9	514.473	63.5653
3-isopropylmalate dehydratase small subunit] [protein_id=AKB53226.1	209	3-isopropylmalate dehydratase small subunit	AKB53226.1	230.344	55.9336	262.459	9.30933	217.792	43.7484	230.806	46.5416	249.902	16.0379	280.488	7.61853	207.898	66.6368	243.888	65.8879
Bipolar DNA helicase] [protein_id=AKB53227.1	210	Bipolar DNA helicase	AKB53227.1	9.2199	7.63984	8.23544	3.97739	5.13752	2.92789	6.18596	4.62728	7.59476	4.37135	5.26764	3.59541	3.95906	2.58751	6.45072	1.50809
azoreductase] [protein_id=AKB53228.1	211	azoreductase	AKB53228.1	7.35558	2.33496	7.22695	3.34216	8.71985	4.91641	7.42206	1.78304	9.47928	5.40548	7.14561	3.28434	7.34646	2.44113	14.3265	10.2306
Phosphoribosylaminoimidazolecarboxamide formyltransferase(alternate form)] [protein_id=AKB53229.1	212	Phosphoribosylaminoimidazolecarboxamide formyltransferase(alternate form)	AKB53229.1	170.372	31.0795	152.243	63.7296	106.819	13.6203	103.592	8.78623	224.932	48.3264	96.1955	15.2773	202.946	86.8928	227.052	21.7057
putative transcriptional regulator] [protein_id=AKB53230.1	213	putative transcriptional regulator	AKB53230.1	76.0053	20.1253	101.159	7.72459	88.7619	18.5168	91.7763	15.975	108.421	17.9569	81.5147	11.0032	104.664	20.6042	118.137	30.2086
tRNA pseudouridine synthase A] [protein_id=AKB53231.1	214	tRNA pseudouridine synthase A	AKB53231.1	131.8	14.0926	110.989	23.9714	153.377	25.5593	125.694	24.7323	154.243	10.8399	104.95	22.4974	133.845	5.81631	137.382	17.8514
tRNA-(G10-N2) methyltransferase] [protein_id=AKB53232.1	215	tRNA-(G10-N2) methyltransferase	AKB53232.1	28.9386	9.07517	27.4999	8.78214	35.1471	15.2375	30.0691	11.2363	39.5015	2.85256	26.5954	1.05862	30.8094	4.76306	37.3984	6.72356
hypothetical protein] [protein_id=AKB53233.1	216	hypothetical protein	AKB53233.1	20.8014	6.15457	19.3325	3.18991	20.5162	4.92364	20.7679	1.66155	22.3116	8.51504	18.5405	9.48059	16.7201	9.39144	22.4508	8.81114
hypothetical protein] [protein_id=AKB53234.1	217	hypothetical protein	AKB53234.1	116.672	17.515	126.517	12.71	140.433	31.9076	159.882	18.8107	101.727	12.9016	126.937	28.6084	93.6186	6.26989	123.618	34.0721
Methionine aminopeptidase] [protein_id=AKB53235.1	218	Methionine aminopeptidase	AKB53235.1	297.588	51.4967	311.418	51.5516	296.258	6.4794	294.9	29.6127	337.384	11.5373	302.022	39.551	377.707	31.8545	313.514	72.1534
Xaa-Pro aminopeptidase] [protein_id=AKB53236.1	219	Xaa-Pro aminopeptidase	AKB53236.1	88.3946	31.7588	90.1571	6.21484	91.5154	5.56068	106.923	27.2199	91.8348	6.54621	92.8403	6.14632	114.912	26.2521	117.567	10.7672
hypothetical protein] [protein_id=AKB53237.1	220	hypothetical protein	AKB53237.1	14.9931	8.37215	9.83081	3.4474	20.9796	6.13688	8.96286	2.91003	11.9772	5.26541	9.08511	3.02354	5.16448	2.88713	10.2045	7.2163
Archaeal S-adenosylmethionine synthetase] [protein_id=AKB53238.1	221	Archaeal S-adenosylmethionine synthetase	AKB53238.1	270.214	34.1254	212.087	31.3334	170.71	28.9227	224.759	9.87812	283.09	36.6462	206.923	32.3504	256.061	27.197	225.569	22.0014
ATP phosphoribosyltransferase] [protein_id=AKB53239.1	222	ATP phosphoribosyltransferase	AKB53239.1	259.751	28.3763	322.532	30.2781	403.915	35.3245	415.291	54.1763	305.267	29.775	297.099	45.6697	360.49	87.3238	418.047	46.5375
Phosphoribosylformimino-5-aminoimidazole carboxamide ribotide isomerase] [protein_id=AKB53240.1	223	Phosphoribosylformimino-5-aminoimidazole carboxamide ribotide isomerase	AKB53240.1	89.316	14.3992	110.248	32.3614	113.873	7.30699	144.302	29.9717	117.553	13.7789	78.2117	7.60944	138.82	55.6754	163.497	14.8658
Imidazoleglycerol-phosphate dehydratase] [protein_id=AKB53241.1	224	Imidazoleglycerol-phosphate dehydratase	AKB53241.1	39.4628	6.50366	26.5562	6.13776	52.4598	5.75848	40.5962	7.04278	37.1085	9.82121	28.8825	6.61112	30.123	2.78495	39.5142	13.8396
Glutathione-regulated potassium-efflux system ancillary protein KefG] [protein_id=AKB53242.1	225	Glutathione-regulated potassium-efflux system ancillary protein KefG	AKB53242.1	27.3447	4.714	18.2241	6.63854	30.5951	2.4868	30.9149	5.78181	20.6819	3.46614	18.696	2.8132	16.6486	3.23996	22.9564	11.0939
Molybdenum ABC transporter, periplasmic molybdenum-binding protein ModA] [protein_id=AKB53243.1	226	Molybdenum ABC transporter, periplasmic molybdenum-binding protein ModA	AKB53243.1	96.3372	10.4809	95.4093	33.853	45.3107	13.492	51.7128	3.24513	81.4443	8.42854	58.3701	2.21627	80.3574	20.7876	85.2898	24.2717
Tungstate ABC transporter, permease protein WtpB] [protein_id=AKB53244.1	227	Tungstate ABC transporter, permease protein WtpB	AKB53244.1	25.0311	6.52325	47.0635	18.0556	31.185	6.12307	38.8789	13.7734	40.5288	10.243	36.5617	14.6687	35.903	14.8259	34.9989	5.36196
Tungstate ABC transporter, ATP-binding protein WtpC] [protein_id=AKB53245.1	228	Tungstate ABC transporter, ATP-binding protein WtpC	AKB53245.1	17.5468	8.73995	23.0437	3.07035	19.0317	3.57118	22.8263	2.37896	25.1237	3.25453	18.9878	6.3617	25.3829	11.6632	27.4866	6.69473
Molybdenum transport system protein ModD] [protein_id=AKB53246.1	229	Molybdenum transport system protein ModD	AKB53246.1	18.595	7.77919	21.9353	4.93587	16.0756	4.96487	22.3376	6.28806	21.846	7.99611	21.3949	5.36732	25.6305	0.455631	26.0897	1.03146
Molybdenum transport ATP-binding protein ModC] [protein_id=AKB53247.1	230	Molybdenum transport ATP-binding protein ModC	AKB53247.1	62.868	22.8204	78.8615	16.3545	57.774	13.4698	84.1252	48.7628	80.3055	7.44373	84.4381	17.5346	95.8432	5.9654	83.3416	7.48466
hypothetical protein] [protein_id=AKB53248.1	231	hypothetical protein	AKB53248.1	35.9168	19.3686	49.4037	9.43789	56.3015	4.99764	51.7998	14.294	61.3712	10.6563	42.2068	8.61867	46.4758	10.7156	55.3281	9.06018
hypothetical protein] [protein_id=AKB53249.1	232	hypothetical protein	AKB53249.1	5.29757	3.53245	1.66025	1.50393	1.22662	1.0638	1.22869	2.12815	3.16831	1.1655	1.00509	1.02526	2.21961	2.04141	4.42695	0.67092
hypothetical protein] [protein_id=AKB53250.1	233	hypothetical protein	AKB53250.1	11.5759	1.97086	14.2853	7.27283	20.9413	6.83175	21.5469	9.29923	9.05466	4.61353	19.9752	7.86165	12.415	0.806718	14.3382	9.35837
hypothetical protein] [protein_id=AKB53251.1	234	hypothetical protein	AKB53251.1	26.4476	4.09241	12.3322	8.35803	20.4386	10.3043	20.8104	8.2225	11.803	4.23188	18.982	5.62515	20.1971	2.45971	17.6104	3.31571
cell surface protein] [protein_id=AKB53252.1	235	cell surface protein	AKB53252.1	180.559	68.5289	195.012	48.5154	96.2292	23.2822	137.13	25.6468	130.835	4.67617	166.228	19.4638	150.629	35.4238	145.857	15.785
Ribosomal protein S6] [protein_id=AKB53253.1	236	Ribosomal protein S6	AKB53253.1	84.8886	15.8586	57.5509	16.4374	46.8434	6.50848	45.8705	31.8151	79.0026	30.0657	46.9515	9.23701	56.7383	11.9685	57.6744	11.0491
Putative serine/threonine protein phosphatase] [protein_id=AKB53254.1	237	Putative serine/threonine protein phosphatase	AKB53254.1	33.8178	10.7672	36.0605	11.7201	41.7592	8.81609	52.6649	13.8524	27.6325	6.96239	40.2582	7.34296	38.6436	15.2017	31.0525	10.4374
Transcriptional regulator, ArsR family] [protein_id=AKB53255.1	238	Transcriptional regulator, ArsR family	AKB53255.1	60.7643	14.4679	41.7589	11.7529	57.783	2.05323	63.0256	5.49249	58.3704	14.394	52.9351	3.329	47.4512	9.76692	56.8995	17.2928
Ribose-1,5-bisphosphate isomerase] [protein_id=AKB53256.1	239	Ribose-1,5-bisphosphate isomerase	AKB53256.1	45.8828	8.31115	52.0426	21.9996	39.7639	12.262	50.1952	19.3194	44.4349	0.645197	35.749	2.06372	45.0642	11.8501	49.7848	9.34683
ABC transporter, ATP-binding protein] [protein_id=AKB53257.1	240	ABC transporter, ATP-binding protein	AKB53257.1	8.42066	4.95113	8.29928	2.12618	6.90578	1.83054	6.92371	5.31744	8.67433	1.65457	7.89259	0.671588	7.86235	0.803033	6.16549	0.749407
ABC transporter, permease protein] [protein_id=AKB53258.1	241	ABC transporter, permease protein	AKB53258.1	28.3493	10.2905	42.119	6.84825	30.1779	1.50604	33.0421	1.04949	24.2656	3.46281	40.6956	8.09777	37.2163	10.9617	22.3918	11.2109
hypothetical protein] [protein_id=AKB53259.1	242	hypothetical protein	AKB53259.1	39.2371	10.4911	21.1547	4.60522	37.0548	5.01037	27.0073	7.60759	28.4117	7.79853	34.1565	13.9182	21.1913	4.44048	22.9186	9.43896
Uridylate kinase] [protein_id=AKB53260.1	243	Uridylate kinase	AKB53260.1	97.8133	5.68728	75.5127	7.23744	84.7679	4.56115	73.6339	22.9556	121.819	9.03312	78.5884	9.74555	105.905	18.6642	115.019	12.7938
Transcriptional regulator, TetR family] [protein_id=AKB53261.1	244	Transcriptional regulator, TetR family	AKB53261.1	37.6659	27.5624	29.1309	10.5206	18.0709	2.08034	16.6038	3.31968	28.4787	5.78546	16.9293	1.86825	33.5493	15.0698	35.8685	7.2447
Ferredoxin] [protein_id=AKB53262.1	245	Ferredoxin	AKB53262.1	47.6991	3.11201	45.7923	8.49502	46.2306	4.29306	41.2059	25.6417	43.0487	7.15648	61.3823	22.5256	56.1284	26.4286	46.6721	8.26251
Alcohol dehydrogenase] [protein_id=AKB53263.1	246	Alcohol dehydrogenase	AKB53263.1	3.20701	1.59681	2.79933	1.59115	4.57498	2.54915	1.23239	1.4137	2.91942	0.869777	1.815	1.75953	2.55433	2.51159	2.5405	2.51098
putative transmembrane efflux protein] [protein_id=AKB53264.1	247	putative transmembrane efflux protein	AKB53264.1	0.810758	0.825099	1.95337	1.69167	3.21344	2.77242	0.616814	1.06835	2.24919	1.43485	1.27874	2.21484	4.55519	1.09273	3.54199	1.6238
Flavodoxin] [protein_id=AKB53265.1	248	Flavodoxin	AKB53265.1	3.40461	3.45864	7.25803	2.15245	8.55804	1.14583	8.56022	3.80534	10.0809	4.57962	8.48268	1.55974	8.77314	1.94111	10.1396	2.50017
Putative membrane protein] [protein_id=AKB53266.1	249	Putative membrane protein	AKB53266.1	20.0364	8.858	8.85119	6.04611	5.14399	1.79481	6.89477	3.28817	5.0785	0.613477	9.43486	6.01343	9.83559	4.7411	11.7807	3.50381
Oxidoreductase, aldo/keto reductase family] [protein_id=AKB53267.1	250	Oxidoreductase, aldo/keto reductase family	AKB53267.1	9.61858	4.84981	5.8259	0.926788	14.7519	4.65365	18.9768	6.09657	10.8458	2.81429	7.69286	2.5181	13.7333	5.95954	15.501	7.67167
Flavodoxin] [protein_id=AKB53268.1	251	Flavodoxin	AKB53268.1	0.230495	0.39923	0.977121	1.69242	2.46571	1.23	2.48902	2.1558	0.213761	0.370245	1.6098	2.78825	1.00418	1.73928	2.60541	0.85295
Transcriptional regulator] [protein_id=AKB53269.1	252	Transcriptional regulator	AKB53269.1	18.4548	9.19745	18.3903	8.0573	11.9975	7.15454	22.8006	7.90305	21.4257	10.2648	16.8879	5.81979	26.3576	6.16191	32.8368	3.44302
Alcohol dehydrogenase] [protein_id=AKB53270.1	253	Alcohol dehydrogenase	AKB53270.1	33.0134	4.03959	24.02	1.40735	28.7781	8.7993	26.037	8.99017	26.9638	4.29638	31.8093	5.89224	36.0171	0.75432	36.4735	6.04039
Flavodoxin] [protein_id=AKB53271.1	254	Flavodoxin	AKB53271.1	12.3552	4.51637	16.468	4.51778	15.418	2.59469	13.9651	4.91384	15.3378	3.12852	12.7812	3.61259	11.597	3.24462	14.5016	1.31142
Fe-S oxidoreductase] [protein_id=AKB53272.1	255	Fe-S oxidoreductase	AKB53272.1	42.3483	11.2531	55.0301	18.1329	62.0613	8.78443	63.502	4.97227	41.7968	9.04509	59.3588	18.9019	42.7092	22.3664	47.9131	12.7541
4-carboxymuconolactone decarboxylase] [protein_id=AKB53273.1	256	4-carboxymuconolactone decarboxylase	AKB53273.1	42.0496	10.3979	32.4143	10.514	37.7189	11.7568	21.8756	2.0938	21.8656	6.73509	34.4095	9.09294	32.1157	4.57471	32.5011	4.92786
nodulation protein L] [protein_id=AKB53274.1	257	nodulation protein L	AKB53274.1	20.4302	1.80022	25.9747	8.64412	32.4594	7.65702	22.9876	14.3657	22.9588	7.33672	19.9146	6.17498	31.6112	14.2119	26.1286	7.01072
hypothetical protein] [protein_id=AKB53275.1	258	hypothetical protein	AKB53275.1	9.14324	4.18336	7.1275	2.40304	8.73229	6.39211	5.76997	3.00367	7.68656	2.49356	6.09991	4.55607	5.62267	2.27775	7.22712	4.48322
Conserved domain protein precursor] [protein_id=AKB53276.1	259	Conserved domain protein precursor	AKB53276.1	9.92951	2.6905	15.3287	5.53386	16.7039	12.0937	9.79484	3.5088	7.25143	2.44857	12.9304	1.23701	14.0184	7.1566	16.6643	5.79351
Membrane protein] [protein_id=AKB53277.1	260	Membrane protein	AKB53277.1	11.5007	5.56791	12.4007	5.7569	16.5724	2.10786	17.159	2.68735	24.1435	8.60606	11.6526	4.96495	21.3467	13.0498	28.6036	8.90476
Aldo/keto reductase] [protein_id=AKB53278.1	261	Aldo/keto reductase	AKB53278.1	39.809	9.84391	27.3381	6.82194	21.3725	7.70202	25.7239	3.86019	25.9132	2.08988	33.8646	7.41796	38.068	18.4093	37.3139	19.096
Circadian phase modifier] [protein_id=AKB53279.1	262	Circadian phase modifier	AKB53279.1	48.9984	26.4334	37.4289	13.8477	37.6128	4.82018	51.9561	19.1448	42.091	6.16788	47.3733	6.89359	59.455	5.8263	51.8655	10.4402
hypothetical protein] [protein_id=AKB53280.1	263	hypothetical protein	AKB53280.1	90.975	5.21936	105.055	33.0732	141.401	15.9623	117.036	27.1135	122.07	17.7519	128.918	11.5859	115.766	5.27525	118.649	6.74292
Aspartate-semialdehyde dehydrogenase] [protein_id=AKB53281.1	264	Aspartate-semialdehyde dehydrogenase	AKB53281.1	458.839	82.8133	409.893	104.629	348.799	13.6012	401.07	50.289	531.338	26.8974	308.732	26.6516	536.891	183.683	508.796	69.6084
hypothetical protein] [protein_id=AKB53282.1	265	hypothetical protein	AKB53282.1	4947.69	695.583	4464.8	646.215	4614.75	115.552	4570.89	612.678	3421.53	247.198	4551.71	380.128	3928.08	387.695	4611.54	651.219
Ferredoxin] [protein_id=AKB53283.1	266	Ferredoxin	AKB53283.1	1610.82	364.582	2606.49	360.352	1667.53	255.779	1657.36	249.177	1373.84	102.974	2500.49	29.4354	2168.71	279.674	1743.68	229.273
hypothetical protein] [protein_id=AKB53284.1	267	hypothetical protein	AKB53284.1	55.0837	16.0531	30.561	8.2457	32.199	0.852511	25.2681	10.5492	27.2265	3.8766	49.5327	12.4852	40.2997	21.7408	25.3005	11.2315
Putative metal chaperone, involved in Zn homeostasis, GTPase of COG0523 family] [protein_id=AKB53285.1	268	Putative metal chaperone, involved in Zn homeostasis, GTPase of COG0523 family	AKB53285.1	144.513	9.81596	147.309	3.85203	126.289	13.5585	121.782	8.10905	130.237	12.2885	142.625	19.125	151.433	6.79375	140.643	11.4616
hypothetical protein] [protein_id=AKB53286.1	269	hypothetical protein	AKB53286.1	5.34198	4.26547	6.21777	3.12371	2.93317	2.72475	4.3684	4.46655	6.55658	2.5964	5.18466	1.43622	5.47913	1.57961	3.60958	2.23139
hypothetical protein] [protein_id=AKB53287.1	270	hypothetical protein	AKB53287.1	9.78125	4.52418	5.17628	3.16366	4.9817	3.29586	6.53318	4.72457	9.19507	1.46011	5.12081	1.50423	6.90079	2.12134	6.98554	3.24002
Biotin synthase-related enzyme] [protein_id=AKB53288.1	271	Biotin synthase-related enzyme	AKB53288.1	188.475	42.2636	192.207	46.6714	209.244	27.4718	184.516	17.2192	194.618	10.9236	219.48	21.4821	190.27	11.4206	195.732	6.05541
2-amino-3,7-dideoxy-D-threo-hept-6-ulosonate synthase] [protein_id=AKB53289.1	272	2-amino-3,7-dideoxy-D-threo-hept-6-ulosonate synthase	AKB53289.1	268.926	36.5864	177.356	31.0597	162.407	20.5216	201.692	38.8256	208.094	24.1915	181.891	32.5322	233.163	38.6173	195.265	83.739
Mobile element protein] [protein_id=AKB53290.1	273	Mobile element protein	AKB53290.1	96.801	2.58907	94.9305	24.3851	141.809	16.3977	133.334	18.7933	118.438	19.9642	91.2258	19.8802	110.712	31.0437	161.536	33.6116
Mobile element protein] [protein_id=AKB53291.1	274	Mobile element protein	AKB53291.1	48.068	15.2186	39.3153	5.58838	41.2067	11.868	23.0173	2.43651	43.197	9.07189	34.1582	10.2817	34.7553	7.93807	43.0126	8.5944
Deoxyuridine 5'-triphosphate nucleotidohydrolase] [protein_id=AKB53292.1	275	Deoxyuridine 5'-triphosphate nucleotidohydrolase	AKB53292.1	34.521	7.06182	53.7323	13.7492	44.2702	0.768415	39.9673	6.09349	51.3228	1.83104	42.9415	7.76748	54.5168	18.0094	52.5643	17.9831
hypothetical protein] [protein_id=AKB53293.1	276	hypothetical protein	AKB53293.1	48.076	15.753	61.3835	3.12779	50.832	6.19661	45.6186	3.69067	60.6192	23.3087	60.7825	10.0984	52.2219	16.9616	44.6639	12.8432
hypothetical protein] [protein_id=AKB53294.1	277	hypothetical protein	AKB53294.1	4.91737	1.58184	1.98567	0.979113	1.35507	0.79758	2.15514	1.92423	3.84015	4.07852	3.24971	1.03959	4.67866	2.06269	3.90812	2.84974
iron-sulfur flavoprotein] [protein_id=AKB53295.1	278	iron-sulfur flavoprotein	AKB53295.1	1.79114	1.66763	2.57185	1.54629	2.67629	0.903745	5.88967	5.2642	4.91205	2.97557	1.2541	0.576711	4.39158	2.55952	3.40258	3.51997
hypothetical protein] [protein_id=AKB53296.1	279	hypothetical protein	AKB53296.1	1.01328	1.2068	0.0975902	0.169031	2.9212	2.70862	4.67927	4.33065	3.20035	1.92314	2.0157	3.24105	2.78125	2.59109	2.35742	3.25251
Peptide methionine sulfoxide reductase MsrB] [protein_id=AKB53297.1	280	Peptide methionine sulfoxide reductase MsrB	AKB53297.1	8.37625	5.14142	7.03003	4.95053	7.32543	1.52327	12.7884	8.18595	9.4653	2.63834	5.66486	2.10832	10.1798	4.06221	8.53995	5.31268
hypothetical protein] [protein_id=AKB53298.1	281	hypothetical protein	AKB53298.1	5.95862	2.09084	0.650832	1.12727	4.79202	2.76038	1.45127	1.30043	0	0	0.32196	0.557651	0	0	0.367182	0.411904
Beta-phosphoglucomutase] [protein_id=AKB53299.1	282	Beta-phosphoglucomutase	AKB53299.1	85.6763	10.4071	70.4655	9.59702	64.4025	17.8512	72.0127	39.8274	62.1951	13.3602	75.5694	8.10643	68.8895	11.9121	60.7332	8.10636
Methanol:corrinoid methyltransferase] [protein_id=AKB53300.1	283	Methanol:corrinoid methyltransferase	AKB53300.1	424.419	126.426	573.956	152.968	473.47	137.952	631.389	149.732	614.038	211.413	444.759	29.2957	351.144	113.004	269.903	14.7649
Methanol methyltransferase corrinoid protein] [protein_id=AKB53301.1	284	Methanol methyltransferase corrinoid protein	AKB53301.1	347.822	106.422	753.591	421.251	158.583	13.0219	243.953	75.6117	682.852	75.1616	443.337	98.9764	282.562	190.531	204.1	49.507
hypothetical protein] [protein_id=AKB53302.1	285	hypothetical protein	AKB53302.1	48.8945	24.1484	27.5963	10.6674	37.7532	9.33904	22.7744	7.51837	34.8794	1.71853	32.1422	7.6442	30.2853	11.6852	38.0678	5.82757
Transcriptional regulator, ArsR family] [protein_id=AKB53303.1	286	Transcriptional regulator, ArsR family	AKB53303.1	23.116	8.12701	17.0231	4.76215	22.8046	3.58993	21.6602	5.18593	24.3683	6.34798	15.8636	4.70119	24.3142	4.24131	26.4473	2.87558
G:T/U mismatch-specific uracil/thymine DNA-glycosylase] [protein_id=AKB53304.1	287	G:T/U mismatch-specific uracil/thymine DNA-glycosylase	AKB53304.1	39.05	11.7527	37.4284	5.95298	35.5294	6.01365	33.1524	9.81278	41.6069	9.89183	39.0301	5.80843	36.6584	4.32706	32.5889	3.45412
Ferredoxin] [protein_id=AKB53305.1	288	Ferredoxin	AKB53305.1	9.21106	6.7862	12.5001	9.26965	10.385	1.92641	11.3161	8.55582	9.38439	4.97625	8.15621	5.22732	17.8791	11.5392	17.3168	13.6883
hypothetical protein] [protein_id=AKB53306.1	289	hypothetical protein	AKB53306.1	47.3508	9.26519	35.4728	10.9598	45.0801	5.66092	54.343	10.7606	46.2274	1.40063	51.8202	12.214	47.0424	16.8147	55.277	3.54052
cysteine protease (papain C1 family)] [protein_id=AKB53307.1	290	cysteine protease (papain C1 family)	AKB53307.1	1.15248	1.99615	0	0	1.16739	1.01195	1.23239	1.4137	0.268748	0.246926	1.60297	1.46649	1.99834	0.941803	0.72	0.628131
Cysteine protease] [protein_id=AKB53308.1	291	Cysteine protease	AKB53308.1	0.796772	0.783161	0.716068	0.62767	0.897578	1.55465	1.53586	2.66019	0.977201	0.720864	0.390361	0.676124	0	0	1.27609	1.73401
Cysteine protease] [protein_id=AKB53309.1	292	Cysteine protease	AKB53309.1	0.230495	0.39923	1.62795	1.49239	2.69569	3.07056	4.23164	2.30437	2.02634	2.46778	0.641644	0.55569	2.22212	1.38241	3.74526	4.57889
integral membrane protein] [protein_id=AKB53310.1	293	integral membrane protein	AKB53310.1	39.9626	17.8236	27.5664	13.5303	34.0773	7.98451	50.0584	12.4081	31.0457	7.36178	39.5459	2.47668	36.224	4.36416	39.2088	7.59615
Type II secretion system protein] [protein_id=AKB53311.1	294	Type II secretion system protein	AKB53311.1	16.3764	2.32537	9.3733	4.30691	20.4136	7.66367	22.0475	7.01674	13.2537	3.51598	10.2571	3.98626	17.4178	5.2783	20.1626	1.01579
Biotin synthesis protein BioC] [protein_id=AKB53312.1	295	Biotin synthesis protein BioC	AKB53312.1	46.23	16.8311	35.4098	9.36232	44.1766	9.93517	38.2771	15.2432	36.0032	6.62606	41.2118	3.91219	35.3884	4.14898	48.7848	11.9036
Cysteine desulfurase] [protein_id=AKB53313.1	296	Cysteine desulfurase	AKB53313.1	96.7957	31.3653	125.707	47.1086	146.64	20.3851	124.44	16.8249	124.657	32.393	77.0648	7.32392	163.616	69.4077	195.546	24.9561
Uncharacterized protein conserved in archaea (DUF531)] [protein_id=AKB53314.1	297	Uncharacterized protein conserved in archaea (DUF531)	AKB53314.1	13.8969	3.16931	18.5526	7.37141	17.4631	7.66234	13.8355	0.895866	16.1396	6.47994	12.8684	7.71733	16.4399	4.48436	23.5103	8.32723
Chitin binding protein] [protein_id=AKB53315.1	298	Chitin binding protein	AKB53315.1	488.704	102.815	729.23	174.479	259.669	26.9512	415.292	11.1646	597.298	123.268	639.266	57.5694	488.929	185.497	475.488	37.9755
cell surface protein] [protein_id=AKB53316.1	299	cell surface protein	AKB53316.1	317.081	58.6683	373.047	65.2641	207.156	6.7227	248.002	18.9018	335.704	25.853	336.637	34.4824	329.395	30.5788	332.739	12.9453
cell surface protein] [protein_id=AKB53317.1	300	cell surface protein	AKB53317.1	53.2412	25.5062	52.24	12.9483	24.566	7.81345	36.5882	4.60816	39.78	13.4955	43.9599	6.80006	45.6064	5.52023	43.7911	6.50083
Chitin binding protein] [protein_id=AKB53318.1	301	Chitin binding protein	AKB53318.1	398.449	29.3676	427.902	14.106	286.008	46.3195	371.957	30.9173	451.418	24.7746	402.781	25.1691	471.488	84.1747	415.431	9.84218
Chitin binding protein] [protein_id=AKB53319.1	302	Chitin binding protein	AKB53319.1	489.082	49.9128	604.447	45.5158	367.529	49.4786	455.85	28.6854	585.791	50.059	571.974	29.5765	591.908	36.6414	533.923	20.9619
GCN5-related N-acetyltransferase] [protein_id=AKB53320.1	303	GCN5-related N-acetyltransferase	AKB53320.1	15.2016	3.58376	8.81988	2.56315	20.4694	2.49939	21.8996	9.60359	20.3936	3.64758	12.5907	5.97389	16.1472	6.38146	17.5349	8.19334
ATP-utilizing enzyme of the PP-loop superfamily] [protein_id=AKB53321.1	304	ATP-utilizing enzyme of the PP-loop superfamily	AKB53321.1	61.1788	25.8648	50.1206	20.0022	51.2078	6.57463	45.1654	9.65066	44.4322	10.1724	65.455	4.92615	49.012	10.1083	48.1553	9.14495
Phosphomannomutase] [protein_id=AKB53322.1	305	Phosphomannomutase	AKB53322.1	225.239	14.553	245.274	50.7435	178.995	8.83493	194.043	15.611	213.056	17.2024	218.045	6.8411	205.196	12.9765	207.8	17.7114
(dimethylallyl)adenosine tRNA methylthiotransferase] [protein_id=AKB53323.1	306	(dimethylallyl)adenosine tRNA methylthiotransferase	AKB53323.1	75.9167	19.4764	74.2109	14.3994	89.2761	12.9065	88.6917	6.60919	89.7755	9.34027	69.217	14.9572	101.913	23.1684	123.723	6.85742
Zinc metalloprotease] [protein_id=AKB53324.1	307	Zinc metalloprotease	AKB53324.1	149.826	26.0745	165.487	46.4989	158.758	23.9975	168.789	8.64751	172.601	41.0859	197.506	17.8842	157.02	25.625	183.351	47.7747
Aconitate hydratase X, predicted] [protein_id=AKB53325.1	308	Aconitate hydratase X, predicted	AKB53325.1	9.94248	5.03916	9.24706	8.37649	14.0584	3.46404	11.1628	2.5283	18.5826	0.737746	7.19488	4.30389	11.5318	3.1565	12.0516	3.58168
hypothetical protein] [protein_id=AKB53326.1	309	hypothetical protein	AKB53326.1	141.612	24.8589	117.169	4.83139	141.792	15.7821	112.159	20.3276	135.721	21.9682	119.858	10.4325	146.107	33.4761	138.358	24.503
3-octaprenyl-4-hydroxybenzoate decarboxylase] [protein_id=AKB53327.1	310	3-octaprenyl-4-hydroxybenzoate decarboxylase	AKB53327.1	91.1088	40.6307	96.9607	9.79071	112.876	12.7243	131.087	7.74893	113.205	5.89645	109.496	9.25612	104.29	14.2869	104.087	19.138
putative aminotransferase, class-II] [protein_id=AKB53328.1	311	putative aminotransferase, class-II	AKB53328.1	22.7809	15.3848	11.1958	2.66174	21.3998	7.11376	16.8627	4.62575	19.8583	14.4761	19.4376	5.01545	18.7554	5.39016	17.5381	1.36743
Glycosyltransferase] [protein_id=AKB53329.1	312	Glycosyltransferase	AKB53329.1	20.8927	8.35817	13.9277	9.85332	14.0137	4.62813	15.3823	4.13332	9.98913	0.862493	19.915	12.3594	16.8129	10.3867	16.0485	5.33306
Citrate synthase (si)] [protein_id=AKB53330.1	313	Citrate synthase (si)	AKB53330.1	373.099	51.3895	418.444	52.1522	390.204	42.6783	411.544	20.1867	366.104	23.6658	397.438	32.3017	366.74	20.2497	414.985	50.116
Aconitate hydratase] [protein_id=AKB53331.1	314	Aconitate hydratase	AKB53331.1	646.86	150.033	706.436	43.5858	587.83	27.0188	698.634	66.9972	692.511	35.6736	795.456	47.8746	845.804	77.1679	870.606	48.6933
hypothetical protein] [protein_id=AKB53332.1	315	hypothetical protein	AKB53332.1	8.02468	3.78248	10.2522	3.19944	16.2777	5.0293	8.15016	1.18034	7.94144	3.50703	8.88306	3.71672	11.1338	4.19629	14.4958	2.87825
Phage T7 exclusion protein] [protein_id=AKB53333.1	316	Phage T7 exclusion protein	AKB53333.1	31.7958	13.195	26.6543	8.23607	27.4827	0.495915	19.6868	8.94909	20.0916	9.91586	26.4508	9.37945	19.9351	4.4776	25.6565	6.44821
hypothetical protein] [protein_id=AKB53334.1	317	hypothetical protein	AKB53334.1	20.1983	8.00179	24.0224	6.54207	28.2463	7.23528	24.2568	5.04161	29.5792	10.7842	18.6468	3.16752	31.7341	18.1866	31.6592	4.98288
hypothetical protein] [protein_id=AKB53335.1	318	hypothetical protein	AKB53335.1	41.6733	11.0963	37.0382	2.91634	52.4364	12.586	39.2451	16.4614	28.4084	3.55837	39.8802	3.7711	36.6546	6.57595	36.6326	2.17965
hypothetical protein] [protein_id=AKB53336.1	319	hypothetical protein	AKB53336.1	53.61	16.6585	41.2976	13.6024	70.6582	7.98555	49.5188	7.01816	48.2411	8.4143	40.322	14.3875	38.1459	4.04631	53.0552	14.6422
MoxR-related protein] [protein_id=AKB53337.1	320	MoxR-related protein	AKB53337.1	84.7765	9.3052	85.9224	18.6021	132.211	9.56871	111.767	18.3061	83.341	7.65891	92.8645	12.6155	109.012	14.8971	103.909	16.1588
Dinucleotide-utilizing enzymes involved in molybdopterin and thiamine biosynthesis family 2] [protein_id=AKB53338.1	321	Dinucleotide-utilizing enzymes involved in molybdopterin and thiamine biosynthesis family 2	AKB53338.1	39.4159	4.53641	15.6902	7.82114	23.9865	4.35916	26.2683	11.9578	25.4837	13.953	14.5839	4.50735	23.7369	12.6961	34.7004	0.978714
hypothetical protein] [protein_id=AKB53339.1	322	hypothetical protein	AKB53339.1	40.2197	7.11888	53.0818	17.687	40.6077	3.18041	57.2556	22.6812	42.6684	3.56077	41.3025	4.63111	45.5074	3.723	51.0007	3.71191
Alkyl hydroperoxide reductase subunit C-like protein] [protein_id=AKB53340.1	323	Alkyl hydroperoxide reductase subunit C-like protein	AKB53340.1	49.3553	26.3401	36.4836	5.75653	66.119	13.1506	90.5609	13.4574	48.254	7.92699	41.007	14.2066	44.7439	17.4203	61.0221	7.69123
hypothetical protein] [protein_id=AKB53341.1	324	hypothetical protein	AKB53341.1	33.3698	8.2531	27.9915	14.2274	34.8962	5.90735	36.0992	7.15837	26.7899	4.51256	27.4514	9.65436	17.2097	1.71448	31.757	15.5341
Molybdenum cofactor sulfurase] [protein_id=AKB53342.1	325	Molybdenum cofactor sulfurase	AKB53342.1	19.1312	15.6016	13.5725	1.61617	19.877	2.76021	31.852	8.66974	18.7015	3.68821	15.0596	4.90605	17.7857	10.7395	25.0366	5.8208
hypothetical protein] [protein_id=AKB53343.1	326	hypothetical protein	AKB53343.1	30.8084	13.8733	28.5389	12.2379	46.9595	16.2515	43.9729	11.4792	23.7622	5.93633	30.2332	6.53629	27.395	5.49208	25.9982	9.20915
hypothetical protein] [protein_id=AKB53344.1	327	hypothetical protein	AKB53344.1	85.7637	38.1141	55.6208	20.9414	51.6375	4.57292	51.6218	14.7485	38.609	17.2586	63.1876	13.4067	43.5561	17.7289	45.5886	18.5178
hypothetical protein] [protein_id=AKB53345.1	328	hypothetical protein	AKB53345.1	13.5024	9.07386	10.3175	1.36777	15.3125	2.53964	10.4614	4.73261	13.1603	3.02085	13.111	1.55923	10.0068	3.73267	8.8225	2.46785
Ribulose-5-phosphate 4-epimerase and related epimerase and aldolase] [protein_id=AKB53346.1	329	Ribulose-5-phosphate 4-epimerase and related epimerase and aldolase	AKB53346.1	80.1127	23.7015	88.5036	16.5097	90.3051	7.53426	92.472	6.67155	89.1636	13.6603	83.0753	7.96339	100.546	17.3362	108.832	14.1844
CDP-diacylglycerol--glycerol-3-phosphate 3-phosphatidyltransferase] [protein_id=AKB53347.1	330	CDP-diacylglycerol--glycerol-3-phosphate 3-phosphatidyltransferase	AKB53347.1	131.974	21.7022	84.1307	20.4136	91.8574	0.803837	87.1412	12.656	90.6696	13.1958	95.6039	10.5424	92.1041	19.3657	105.316	4.47728
Archease] [protein_id=AKB53348.1	331	Archease	AKB53348.1	9.24888	2.5817	15.6211	4.24844	18.9754	9.12915	11.4628	1.41538	16.2724	5.19323	9.70982	7.07651	12.6056	7.59494	15.6585	4.71143
RNA-2',3'-PO4:RNA-5'-OH ligase] [protein_id=AKB53349.1	332	RNA-2',3'-PO4:RNA-5'-OH ligase	AKB53349.1	151.748	11.9076	179.24	4.79362	195.742	21.9114	175.744	36.2645	201.104	21.9079	173.303	15.4436	172.302	14.6468	178.797	33.9526
hypothetical protein] [protein_id=AKB53350.1	333	hypothetical protein	AKB53350.1	53.7035	8.79798	50.5792	3.2374	66.0081	16.4459	62.6022	7.04036	49.445	7.29052	58.7218	15.773	48.0699	24.8228	37.0504	3.38837
N5-methyltetrahydromethanopterin:coenzyme M methyltransferase subunit H] [protein_id=AKB53351.1	334	N5-methyltetrahydromethanopterin:coenzyme M methyltransferase subunit H	AKB53351.1	1877.48	315.578	1911.16	519.258	1392.17	159.403	1681.27	217.537	2222.23	174.658	1650.4	289.593	2253.35	395.689	1886.51	450.229
N5-methyltetrahydromethanopterin:coenzyme M methyltransferase subunit G] [protein_id=AKB53352.1	335	N5-methyltetrahydromethanopterin:coenzyme M methyltransferase subunit G	AKB53352.1	392.051	84.7779	466.935	62.4742	349.546	34.5131	332.112	34.2801	394.317	61.6662	430.102	46.6197	399.723	12.2642	407.63	1.23961
N5-methyltetrahydromethanopterin:coenzyme M methyltransferase subunit F] [protein_id=AKB53353.1	336	N5-methyltetrahydromethanopterin:coenzyme M methyltransferase subunit F	AKB53353.1	224.416	42.2116	300.779	25.4578	222.785	26.9428	241.037	12.009	267.548	14.4849	269.51	11.6548	350.086	80.7508	285.968	100.452
N5-methyltetrahydromethanopterin:coenzyme M methyltransferase subunit A] [protein_id=AKB53354.1	337	N5-methyltetrahydromethanopterin:coenzyme M methyltransferase subunit A	AKB53354.1	1219.91	219.656	1682.24	343.371	1004.15	130.097	1178.95	150.964	1513.07	126.093	1499.18	179.535	1413.84	147.975	1215.44	107.483
N5-methyltetrahydromethanopterin:coenzyme M methyltransferase subunit B] [protein_id=AKB53355.1	338	N5-methyltetrahydromethanopterin:coenzyme M methyltransferase subunit B	AKB53355.1	529.346	23.7025	631.238	57.3803	435.109	53.2671	599.158	92.2719	535.413	116.688	598.218	32.7798	542.378	45.286	521.338	8.4364
N5-methyltetrahydromethanopterin:coenzyme M methyltransferase subunit C] [protein_id=AKB53356.1	339	N5-methyltetrahydromethanopterin:coenzyme M methyltransferase subunit C	AKB53356.1	1450.39	249.842	1970.03	128.592	1323.26	54.6536	1482.69	96.0735	1549.96	423.498	1965.95	110.726	1760.89	237.213	1499.9	34.3383
N5-methyltetrahydromethanopterin:coenzyme M methyltransferase subunit D] [protein_id=AKB53357.1	340	N5-methyltetrahydromethanopterin:coenzyme M methyltransferase subunit D	AKB53357.1	1633.23	78.7783	2334.49	171.429	1609.29	179.06	1786.71	174.134	1697.29	629.264	2299.33	204.339	1910.71	280.61	1794.64	95.9312
N5-methyltetrahydromethanopterin:coenzyme M methyltransferase subunit E] [protein_id=AKB53358.1	341	N5-methyltetrahydromethanopterin:coenzyme M methyltransferase subunit E	AKB53358.1	2254.24	235.413	3884.31	1105.98	2670.28	441.678	3147.44	250.698	2463.12	950.882	4379.22	626.987	3102.37	780.55	2980.8	449.375
Sugar phosphate isomerase/epimerase] [protein_id=AKB53359.1	342	Sugar phosphate isomerase/epimerase	AKB53359.1	94.9207	6.83075	129.986	44.2711	167.221	57.2216	153.179	9.67357	99.9316	11.3053	132.487	39.4873	113.7	10.0039	138.231	31.5826
sodium-solute symporter, putative] [protein_id=AKB53360.1	343	sodium-solute symporter, putative	AKB53360.1	208.369	16.3351	225.152	25.5592	170.788	23.4482	173.653	34.8677	192.666	18.8918	270.214	22.4145	241.248	46.9718	227.801	2.75543
DNA-binding domain of ModE] [protein_id=AKB53361.1	344	DNA-binding domain of ModE	AKB53361.1	33.3499	11.7547	14.0269	5.05831	23.8521	4.14405	21.0859	3.06959	24.8135	13.6884	17.12	3.19264	38.3809	17.6049	35.081	12.4207
hypothetical protein] [protein_id=AKB53362.1	345	hypothetical protein	AKB53362.1	241.297	61.2834	308.941	45.5502	197.745	7.00099	277.097	8.64681	218.946	7.64622	289.087	16.3543	279.607	48.5702	337.924	71.8515
hypothetical protein] [protein_id=AKB53363.1	346	hypothetical protein	AKB53363.1	144.048	21.7257	152.394	18.2274	108.604	11.7164	135.174	14.6987	156.956	19.5622	114.912	19.0615	138.028	41.417	168.635	24.8376
transporter, RND superfamily] [protein_id=AKB53364.1	347	transporter, RND superfamily	AKB53364.1	317.1	82.391	332.061	38.1181	203.622	13.9103	219.861	32.0534	306.9	31.7758	272.789	13.9446	362.997	81.129	397.6	16.4515
Transcriptional regulator, TrmB family] [protein_id=AKB53365.1	348	Transcriptional regulator, TrmB family	AKB53365.1	69.8661	27.7628	40.2583	8.11512	47.9675	9.12997	46.0615	6.5595	44.655	6.01928	39.9275	10.4462	49.0151	21.9235	54.9568	17.462
putative metal dependent hydrolase] [protein_id=AKB53366.1	349	putative metal dependent hydrolase	AKB53366.1	50.3961	7.30195	67.8292	0.933637	86.2464	15.5608	106.868	15.4644	65.9277	6.29296	61.0575	7.08491	75.1966	10.4638	82.6476	5.14312
Ribonuclease P protein component 4] [protein_id=AKB53367.1	350	Ribonuclease P protein component 4	AKB53367.1	11.1813	4.38186	12.0425	0.561866	17.1733	6.77995	16.5689	6.30774	7.8102	0.658207	12.2427	1.02716	11.7336	7.33613	14.7895	2.84917
Signal recognition particle SEC65 subunit] [protein_id=AKB53368.1	351	Signal recognition particle SEC65 subunit	AKB53368.1	31.3083	24.4366	25.7127	2.45925	42.2163	14.5795	39.7519	1.63427	33.6504	4.51675	27.0497	4.19861	43.0859	10.8451	39.9704	13.1749
hypothetical protein] [protein_id=AKB53369.1	352	hypothetical protein	AKB53369.1	5.66167	2.96536	3.74322	1.57036	7.35976	6.10254	3.00542	1.83767	5.13516	3.70215	6.27732	1.70996	3.47078	3.3625	2.72672	3.99567
Type I restriction-modification system, restriction subunit R] [protein_id=AKB53370.1	353	Type I restriction-modification system, restriction subunit R	AKB53370.1	43.6296	13.112	40.191	12.02	32.9687	5.64731	47.2234	9.72026	43.7554	7.45336	40.8296	12.1135	36.4133	13.0316	48.0291	16.943
hypothetical protein] [protein_id=AKB53371.1	354	hypothetical protein	AKB53371.1	0	0	2.24701	3.16194	1.79316	2.3759	0.922751	0.921518	1.54983	1.39558	2.21088	3.09997	2.25283	3.07366	2.35742	3.25251
hypothetical protein] [protein_id=AKB53372.1	355	hypothetical protein	AKB53372.1	26.0407	12.7839	14.6452	6.83152	19.8143	6.50491	15.2905	1.30507	17.465	3.74112	17.3895	6.93103	13.6762	1.88899	14.3835	4.15312
Type I restriction-modification system, specificity subunit S] [protein_id=AKB53373.1	356	Type I restriction-modification system, specificity subunit S	AKB53373.1	31.459	12.8372	24.8963	6.37179	29.3211	7.54419	19.8367	3.8089	26.5988	9.55062	28.5067	5.7041	27.9793	5.68353	25.987	8.54728
Type I restriction-modification system, DNA-methyltransferase subunit M] [protein_id=AKB53374.1	357	Type I restriction-modification system, DNA-methyltransferase subunit M	AKB53374.1	27.0061	9.67032	32.9386	5.69882	29.0483	3.19384	29.1755	6.25332	42.78	7.65629	34.8443	14.8509	40.437	9.52695	28.8345	6.04384
hypothetical protein] [protein_id=AKB53375.1	358	hypothetical protein	AKB53375.1	143.367	35.0656	110.142	21.9805	114.466	3.01569	107.812	8.53707	129.347	17.904	99.231	27.2338	105.904	30.3112	119.321	23.2392
hypothetical protein] [protein_id=AKB53376.1	359	hypothetical protein	AKB53376.1	9.82321	3.24526	8.62319	5.07851	12.2165	2.72464	12.343	6.85672	5.9521	4.00379	8.23367	2.99224	10.9526	7.34287	11.073	7.18108
hypothetical protein] [protein_id=AKB53377.1	360	hypothetical protein	AKB53377.1	63.362	2.83435	27.1073	10.9837	92.0038	13.6106	92.3683	38.741	22.2399	12.723	28.4866	6.28331	24.5938	2.39001	30.2686	10.345
hypothetical protein] [protein_id=AKB53378.1	361	hypothetical protein	AKB53378.1	16.7171	5.62146	15.8528	6.01091	14.1475	4.43276	13.5467	4.57459	24.5899	8.79609	14.0823	1.41275	19.9295	5.06356	12.3432	5.89514
ubiquinone/menaquinone biosynthesis methyltransferase] [protein_id=AKB53379.1	362	ubiquinone/menaquinone biosynthesis methyltransferase	AKB53379.1	53.3569	12.7281	91.5646	28.3378	41.3729	3.20905	47.9097	17.0707	65.4238	3.71029	55.2007	11.3279	54.9418	10.6502	48.5688	10.2369
Oligopeptide transport ATP-binding protein OppF] [protein_id=AKB53380.1	363	Oligopeptide transport ATP-binding protein OppF	AKB53380.1	33.1536	6.36253	42.6373	12.5905	38.9455	12.8833	55.7411	16.2494	62.6616	8.2167	35.4234	6.7291	43.1523	4.04647	37.9322	8.06239
Oligopeptide transport system permease protein OppB] [protein_id=AKB53381.1	364	Oligopeptide transport system permease protein OppB	AKB53381.1	87.3486	7.54673	115.058	7.18088	76.2308	13.8954	74.7827	16.7709	122.402	38.5689	108.493	9.30697	86.8826	20.3426	79.5363	17.9711
Oligopeptide transport system permease protein OppC] [protein_id=AKB53382.1	365	Oligopeptide transport system permease protein OppC	AKB53382.1	165.15	17.9242	221.913	18.6413	148.898	29.3129	184.522	14.7182	232.649	101.3	204.565	6.39648	182.157	26.6309	150.826	10.9994
Dipeptide transport system permease protein DppB] [protein_id=AKB53383.1	366	Dipeptide transport system permease protein DppB	AKB53383.1	252.145	44.0585	362.682	62.4449	190.158	31.3046	334.677	21.768	383.843	187.942	266.395	46.7156	272.366	37.017	263.925	37.5814
Oligopeptide ABC transporter, periplasmic oligopeptide-binding protein OppA] [protein_id=AKB53384.1	367	Oligopeptide ABC transporter, periplasmic oligopeptide-binding protein OppA	AKB53384.1	336.493	59.9909	448.296	152.525	191.705	6.98612	270.438	40.542	497.463	36.2651	269.531	4.44583	363.021	90.5013	313.97	111.609
23S rRNA (uracil(747)-C(5))-methyltransferase] [protein_id=AKB53385.1	368	23S rRNA (uracil(747)-C(5))-methyltransferase	AKB53385.1	254.357	53.1966	284.821	86.1357	140.708	27.2444	207.03	41.573	335.066	66.2063	192.405	8.20101	275.965	78.2313	240.96	56.2294
ABC transporter, solute-binding protein] [protein_id=AKB53386.1	369	ABC transporter, solute-binding protein	AKB53386.1	100.036	47.2096	70.7915	10.602	117.555	18.2913	124.756	28.6705	70.4786	17.4496	71.7378	5.06868	116.309	41.2781	125.804	7.86472
FmdE, Molybdenum formylmethanofuran dehydrogenase operon] [protein_id=AKB53387.1	370	FmdE, Molybdenum formylmethanofuran dehydrogenase operon	AKB53387.1	355.19	58.9804	453.22	51.7571	624.655	31.2635	688.891	51.3063	495.234	55.3773	455.803	50.4463	594.141	164.674	546.574	28.7766
Polyferredoxin protein MvhB] [protein_id=AKB53388.1	371	Polyferredoxin protein MvhB	AKB53388.1	1308.66	314.823	2081.84	395.568	2392.55	225.069	2261.13	113.897	1777.98	133.784	2282.63	201.135	2181.05	251.686	1993.51	45.2308
Formylmethanofuran dehydrogenase subunit A] [protein_id=AKB53389.1	372	Formylmethanofuran dehydrogenase subunit A	AKB53389.1	1313.42	114.605	1695.27	151.522	1919.76	123.71	1837.95	22.1127	1625.54	182.755	1795.29	77.8827	2008.62	259.302	1720.76	337.56
Formylmethanofuran dehydrogenase (molybdenum) subunit C] [protein_id=AKB53390.1	373	Formylmethanofuran dehydrogenase (molybdenum) subunit C	AKB53390.1	475.668	60.5571	646.386	20.7176	767.356	97.381	832.622	190.044	545.006	56.4876	780.09	122.322	735.351	69.1312	641.901	109.921
Formylmethanofuran dehydrogenase (molybdenum) subunit D] [protein_id=AKB53391.1	374	Formylmethanofuran dehydrogenase (molybdenum) subunit D	AKB53391.1	220.321	19.1411	367.652	127.976	390.678	32.7393	352.316	29.7176	233.76	41.4449	455.683	65.9979	302.518	71.1599	298.908	41.7608
Formylmethanofuran dehydrogenase (molybdenum) subunit B] [protein_id=AKB53392.1	375	Formylmethanofuran dehydrogenase (molybdenum) subunit B	AKB53392.1	1093.96	246.755	1571.86	214.09	1897.27	125.713	2103.05	400.255	1429.38	167.013	1778.82	26.1221	1724.79	83.0052	1501.67	112.693
Outer membrane protein] [protein_id=AKB53393.1	376	Outer membrane protein	AKB53393.1	351.56	127.013	325.798	188.967	151.501	20.2607	282.012	41.7712	428.912	77.2547	141.657	25.9929	413.166	210.338	516.643	75.4106
hypothetical protein] [protein_id=AKB53394.1	377	hypothetical protein	AKB53394.1	31.6675	8.38855	24.3461	1.81479	17.2236	2.39405	17.7444	13.0296	15.75	2.28646	18.6468	3.16752	13.6612	2.3976	11.1416	4.03979
Mobile element protein] [protein_id=AKB53395.1	378	Mobile element protein	AKB53395.1	39.5852	7.94558	40.7882	15.4618	32.1767	11.6658	37.9524	7.37764	40.1505	13.5034	40.0171	7.73594	43.6056	3.83736	41.8871	6.8062
hypothetical protein] [protein_id=AKB53396.1	379	hypothetical protein	AKB53396.1	7.91873	4.08707	4.5901	3.43674	10.8361	2.56187	8.77909	1.40267	9.15703	2.17331	4.23016	2.04366	5.20206	5.07389	10.1167	4.23901
hypothetical protein] [protein_id=AKB53397.1	380	hypothetical protein	AKB53397.1	4947.69	695.583	4464.8	646.215	4614.75	115.552	4570.89	612.678	3421.53	247.198	4551.71	380.128	3928.08	387.695	4611.54	651.219
sensory transduction histidine kinase] [protein_id=AKB53404.1	381	sensory transduction histidine kinase	AKB53404.1	1.79361	0.498568	2.14791	1.27954	5.62288	2.87788	5.56074	3.16499	5.29226	0.867328	4.06189	1.53447	4.35898	2.31716	7.43573	2.78577
hypothetical protein] [protein_id=AKB53405.1	382	hypothetical protein	AKB53405.1	4947.69	695.583	4464.8	646.215	4614.75	115.552	4570.89	612.678	3421.53	247.198	4551.71	380.128	3928.08	387.695	4611.54	651.219
Sensory transduction histidine kinase] [protein_id=AKB53406.1	383	Sensory transduction histidine kinase	AKB53406.1	0.796772	0.783161	0.423297	0.501467	0.724831	0.946135	1.84303	3.19222	1.56659	0.519047	1.06119	0.824254	1.20039	1.33749	0.812589	1.40745
cell surface protein] [protein_id=AKB53410.1	384	cell surface protein	AKB53410.1	4.53717	1.25211	5.50048	1.44874	8.82785	0.740713	8.99921	2.04768	6.53821	1.03953	6.41867	1.49106	4.20543	1.96955	5.22623	2.82748
hypothetical protein] [protein_id=AKB53411.1	385	hypothetical protein	AKB53411.1	4947.69	695.583	4464.8	646.215	4614.75	115.552	4570.89	612.678	3421.53	247.198	4551.71	380.128	3928.08	387.695	4611.54	651.219
Signal peptidase, type IV - prepilin/preflagellin] [protein_id=AKB53412.1	386	Signal peptidase, type IV - prepilin/preflagellin	AKB53412.1	1.37457	2.38083	2.11532	1.56889	3.20546	1.09062	1.8722	1.88318	4.85874	1.70292	1.76669	1.93595	4.55519	1.09273	2.80763	1.48094
hypothetical protein] [protein_id=AKB53413.1	387	hypothetical protein	AKB53413.1	15.6654	6.56864	12.9218	4.54503	14.5015	5.30896	13.3647	14.0552	20.7722	4.11748	9.55941	3.459	19.9596	6.04823	19.7667	3.07515
Cobalt-precorrin-6y C5-methyltransferase] [protein_id=AKB53414.1	388	Cobalt-precorrin-6y C5-methyltransferase	AKB53414.1	71.4978	21.0567	96.1811	8.85533	116.791	9.27804	123.185	16.1138	113.625	17.6202	76.9169	8.46985	115.149	43.5619	116.096	4.13249
Cobalt-precorrin-6 synthase, anaerobic] [protein_id=AKB53415.1	389	Cobalt-precorrin-6 synthase, anaerobic	AKB53415.1	219.499	42.4665	224.074	55.11	218.547	42.148	232.288	23.3091	323.78	56.1171	183.982	35.962	334.112	96.5293	357.387	71.6953
DNA mismatch repair protein MutL] [protein_id=AKB53416.1	390	DNA mismatch repair protein MutL	AKB53416.1	50.1468	11.4743	53.3494	16.8498	40.9478	11.3661	55.0031	28.9901	45.5178	11.2943	57.6418	5.1815	54.7274	7.46176	45.7181	4.99822
DNA mismatch repair protein MutS] [protein_id=AKB53417.1	391	DNA mismatch repair protein MutS	AKB53417.1	112.749	1.22131	103.119	22.7778	100.982	12.1752	77.0872	6.42696	95.6297	21.4872	106.133	27.7314	143.629	12.8335	111.321	24.7324
hypothetical protein] [protein_id=AKB53418.1	392	hypothetical protein	AKB53418.1	16.7203	3.76895	11.6512	4.36321	18.6519	5.97064	19.5489	4.29927	12.8353	4.52934	14.4549	3.38212	12.1656	4.17739	12.0298	2.8154
Transcriptional regulator, PadR family] [protein_id=AKB53419.1	393	Transcriptional regulator, PadR family	AKB53419.1	3.69496	4.43322	2.60356	0.56233	5.27889	2.55249	7.29371	6.53847	5.47398	1.37922	5.46741	2.19958	5.17952	1.92995	3.47227	2.11479
cell surface protein] [protein_id=AKB53420.1	394	cell surface protein	AKB53420.1	227.82	55.0388	235.093	23.3512	191.816	53.6736	223.329	19.7811	274.125	71.7488	219.825	18.1786	344.507	112.122	268.217	69.0638
Glutamyl-tRNA synthetase / Glutamyl-tRNA(Gln) synthetase] [protein_id=AKB53421.1	395	Glutamyl-tRNA synthetase / Glutamyl-tRNA(Gln) synthetase	AKB53421.1	84.3207	17.4413	77.2647	17.8223	70.9668	9.61509	68.0057	8.15964	95.2948	20.9093	80.3578	14.2875	110.09	31.8086	113.417	20.1384
hypothetical protein] [protein_id=AKB53422.1	396	hypothetical protein	AKB53422.1	17.6394	10.1994	15.5251	9.4961	18.5518	3.25846	11.8656	8.31436	10.4167	1.28075	13.7996	8.42091	14.2291	6.02715	14.1163	4.2338
Fumarylacetoacetate hydrolase family protein] [protein_id=AKB53423.1	397	Fumarylacetoacetate hydrolase family protein	AKB53423.1	91.4634	21.3633	109.222	20.221	121.081	18.381	103.576	7.15479	99.9396	16.3362	110.161	24.9998	105.002	11.5026	109.694	3.36272
Dihydroorotate dehydrogenase electron transfer subunit] [protein_id=AKB53424.1	398	Dihydroorotate dehydrogenase electron transfer subunit	AKB53424.1	81.5215	8.78686	131.028	48.7759	149.162	5.17591	140.642	23.5497	109.837	11.6288	154.408	26.8404	111.733	15.7654	127.098	23.6821
Dihydroorotate dehydrogenase, catalytic subunit] [protein_id=AKB53425.1	399	Dihydroorotate dehydrogenase, catalytic subunit	AKB53425.1	81.5921	10.3707	126.352	7.15502	122.795	18.7271	127.94	13.5866	121.687	20.236	120.618	10.7306	101.873	16.9182	115.742	29.4773
Porphobilinogen deaminase] [protein_id=AKB53426.1	400	Porphobilinogen deaminase	AKB53426.1	106.828	10.0189	115.513	9.09701	126.099	8.17759	133.462	9.10129	144.875	22.8746	116.653	3.04509	147.786	34.7973	155.529	24.0244
Glutamate-1-semialdehyde aminotransferase] [protein_id=AKB53427.1	401	Glutamate-1-semialdehyde aminotransferase	AKB53427.1	140.853	14.0531	149.231	35.0489	159.032	25.9037	177.661	28.389	188.123	19.6956	135.739	19.7243	212.801	48.2109	194.81	54.7623
Porphobilinogen synthase] [protein_id=AKB53428.1	402	Porphobilinogen synthase	AKB53428.1	215.922	38.7318	213.577	14.3093	188.462	13.1708	177.651	10.649	226.152	13.1467	242.382	21.9746	233.204	7.17501	196.934	28.694
Glutamyl-tRNA reductase] [protein_id=AKB53429.1	403	Glutamyl-tRNA reductase	AKB53429.1	196.831	31.2929	171.437	43.6785	169.77	24.4172	166.402	22.1903	213.074	25.6079	149.333	23.2249	203.436	39.4092	181.926	28.8677
Siroheme synthase] [protein_id=AKB53430.1	404	Siroheme synthase	AKB53430.1	43.4267	8.61765	57.8029	5.99445	68.1332	8.97553	58.3511	12.5066	67.1183	13.0692	57.8958	8.04127	51.9104	2.9323	66.0908	9.72016
Heme biosynthesis protein related to NirL and NirH] [protein_id=AKB53431.1	405	Heme biosynthesis protein related to NirL and NirH	AKB53431.1	93.4359	54.8413	105.184	23.6324	131.25	30.542	140.15	25.7273	98.8045	26.6514	120.531	21.2169	133.406	12.5428	122.053	2.30187
Heme biosynthesis protein related to NirD and NirG] [protein_id=AKB53432.1	406	Heme biosynthesis protein related to NirD and NirG	AKB53432.1	69.7002	27.4797	73.2292	11.489	79.598	5.23364	74.2502	5.23006	68.9759	14.148	62.5323	14.0082	76.3807	9.51163	94.547	14.5798
Radical SAM domain heme biosynthesis protein] [protein_id=AKB53433.1	407	Radical SAM domain heme biosynthesis protein	AKB53433.1	191.078	40.6275	238.01	25.2516	230.614	25.8248	227.578	17.3261	187.614	26.5551	246.437	38.9569	185.911	17.8172	232.808	81.9499
hypothetical protein] [protein_id=AKB53434.1	408	hypothetical protein	AKB53434.1	3.18463	2.22022	0.715777	0.627489	4.00797	3.86838	4.95257	2.96494	2.05529	1.23782	2.6327	1.91106	1.77456	2.62931	0.945093	1.01783
hypothetical protein] [protein_id=AKB53435.1	409	hypothetical protein	AKB53435.1	3.70648	2.62453	3.48129	3.03408	5.00062	2.84533	4.43963	3.26261	4.23422	1.56113	6.34572	0.678588	9.46015	2.5071	6.37517	3.80923
hypothetical protein] [protein_id=AKB53436.1	410	hypothetical protein	AKB53436.1	17.1962	4.72547	18.7795	6.59534	16.4783	7.28257	12.3828	10.1566	21.4094	9.64871	12.8036	1.43462	15.5856	5.77484	10.9368	2.36808
hypothetical protein] [protein_id=AKB53437.1	411	hypothetical protein	AKB53437.1	228.283	37.9698	337.523	47.402	220.435	8.28736	237.993	22.8387	316.498	76.1514	296.483	5.76308	241.091	53.8422	183.974	16.5237
Chorismate synthase] [protein_id=AKB53438.1	412	Chorismate synthase	AKB53438.1	96.0253	15.4813	135.145	30.205	84.0765	22.7601	89.8029	4.44736	123.476	11.7517	106.419	10.7358	119.529	21.6128	129.841	23.8819
Cobalt-zinc-cadmium resistance protein] [protein_id=AKB53439.1	413	Cobalt-zinc-cadmium resistance protein	AKB53439.1	0.782786	1.35583	0.943603	0.977885	2.06744	2.84393	4.2257	2.75348	1.10703	0.304378	0.29277	0.507093	2.51922	3.91471	2.63203	3.83268
3,4-dihydroxy-2-butanone 4-phosphate synthase] [protein_id=AKB53440.1	414	3,4-dihydroxy-2-butanone 4-phosphate synthase	AKB53440.1	173.032	41.3013	190.609	31.7198	186.177	17.2711	217.674	34.3029	251.962	7.73645	209.32	41.3672	253.032	57.0016	282.565	25.8815
DNA-binding HTH domain in riboflavin kinase] [protein_id=AKB53441.1	415	DNA-binding HTH domain in riboflavin kinase	AKB53441.1	87.5064	10.9298	124.564	14.4577	155.819	26.5846	137.195	40.9612	130.573	13.8319	123.646	25.9269	115.786	18.4236	172.877	39.7425
hypothetical protein] [protein_id=AKB53442.1	416	hypothetical protein	AKB53442.1	27.4822	6.06013	22.847	7.02399	26.7738	7.26797	21.45	11.5404	18.2959	7.07197	21.377	7.86712	25.9772	7.75828	32.5202	4.28596
pyridoxamine 5'-phosphate oxidase, FMN-binding family] [protein_id=AKB53443.1	417	pyridoxamine 5'-phosphate oxidase, FMN-binding family	AKB53443.1	124.662	34.6567	101.878	20.6071	89.0287	13.3243	77.178	8.19701	135.842	30.9254	145.631	63.3833	143.032	53.9311	90.017	21.3485
hypothetical protein] [protein_id=AKB53444.1	418	hypothetical protein	AKB53444.1	120.609	55.3534	238.613	30.1626	228.379	29.3414	354.465	139.755	197.231	12.4546	210.422	18.3743	261.602	34.8601	232.47	44.87
Protein-L-isoaspartate O-methyltransferase] [protein_id=AKB53445.1	419	Protein-L-isoaspartate O-methyltransferase	AKB53445.1	35.943	19.0924	61.2232	8.82018	54.7697	11.4884	56.5543	9.30741	43.8442	6.62651	49.6503	11.0569	79.3256	18.5409	69.3796	11.2366
Protein-L-isoaspartate O-methyltransferase] [protein_id=AKB53446.1	420	Protein-L-isoaspartate O-methyltransferase	AKB53446.1	6.46091	3.4561	5.24012	4.02528	4.79204	3.59748	6.27673	3.04327	3.86768	0.652855	5.18146	3.97907	3.85063	0.15936	3.01836	0.86842
hypothetical protein] [protein_id=AKB53447.1	421	hypothetical protein	AKB53447.1	12.4853	6.90605	17.2517	3.70883	22.8992	1.81789	19.0701	11.5394	16.9669	8.36829	16.4359	3.33446	14.2548	1.14065	17.5343	4.3189
Imidazole glycerol phosphate synthase cyclase subunit] [protein_id=AKB53448.1	422	Imidazole glycerol phosphate synthase cyclase subunit	AKB53448.1	153.492	15.7446	132.307	20.312	143.447	19.6038	120.409	16.8411	157.574	12.4496	148.282	32.9326	143.352	10.1155	155.564	20.4999
hypothetical protein] [protein_id=AKB53449.1	423	hypothetical protein	AKB53449.1	202.727	63.7807	232.429	46.5584	205.292	27.5044	258.432	50.8973	207.657	40.513	215.793	30.6426	213.46	31.9337	153.24	33.1402
Protease] [protein_id=AKB53450.1	424	Protease	AKB53450.1	166.012	39.5679	124.23	9.2503	153.026	14.1996	169.538	42.627	161.241	15.2165	153.248	17.9008	164.722	12.6661	162.355	13.6442
deoxynucleoside 5'-monophosphate N-glycosidase] [protein_id=AKB53451.1	425	deoxynucleoside 5'-monophosphate N-glycosidase	AKB53451.1	16.9815	5.58069	18.6157	4.87628	18.6972	6.85279	12.412	7.54618	16.1533	4.02265	19.7089	4.81474	17.6303	6.9727	10.5445	7.05687
hypothetical protein] [protein_id=AKB53452.1	426	hypothetical protein	AKB53452.1	26.7634	1.68959	10.1227	1.98064	6.82811	4.62455	5.56444	1.55741	11.5892	4.03001	7.77036	0.996597	8.45598	2.74928	6.2799	1.21713
LysM protein] [protein_id=AKB53453.1	427	LysM protein	AKB53453.1	33.0764	13.6765	31.6339	6.59665	34.3117	9.09326	23.0803	7.20429	28.277	0.794355	34.8725	9.34267	39.8878	3.27783	39.957	6.93942
Lysyl-tRNA synthetase (class I)] [protein_id=AKB53454.1	428	Lysyl-tRNA synthetase (class I)	AKB53454.1	208.955	32.0085	185.837	50.5128	183.911	32.6712	196.246	7.64089	223.902	17.4064	178.13	22.718	209.757	14.4692	203.003	5.8174
Dimethylamine:corrinoid methyltransferase] [transl_except=(pos:1066..1068,aa:Pyl)] [protein_id=AKB53455.1	429	Dimethylamine:corrinoid methyltransferase	AKB53455.1	1433.54	488.583	4120.41	1403.23	5837.03	970.533	5182.96	393.8	2400.71	259.255	5938.81	416.73	4369.12	1826.81	3094.29	235.211
hypothetical protein] [protein_id=AKB53456.1	430	hypothetical protein	AKB53456.1	11.2251	4.53017	16.1764	2.17845	12.8094	4.88335	32.388	10.489	13.4766	3.44386	26.9639	15.97	15.798	4.07196	22.7052	4.01333
Choline permease LicB] [protein_id=AKB53457.1	431	Choline permease LicB	AKB53457.1	91.0401	15.7407	209.436	31.7469	165.885	46.3945	194.385	23.8514	115.627	34.5716	235.857	24.5955	190.304	28.9146	225.181	17.0497
Trimethylamine methyltransferase corrinoid protein] [protein_id=AKB53458.1	432	Trimethylamine methyltransferase corrinoid protein	AKB53458.1	53.4097	11.4447	65.0015	11.3031	55.6613	6.60409	76.277	4.88153	72.3459	10.3099	61.7421	8.08877	106.666	36.31	102.253	18.8333
Trimethylamine:corrinoid methyltransferase] [transl_except=(pos:1000..1002,aa:Pyl)] [protein_id=AKB53459.1	433	Trimethylamine:corrinoid methyltransferase	AKB53459.1	190.655	24.4717	225.337	29.341	188.978	13.999	234.163	15.262	220.344	13.7742	225.044	11.0305	303.128	73.4901	334.07	16.3089
Dimethylamine methyltransferase corrinoid protein] [protein_id=AKB53460.1	434	Dimethylamine methyltransferase corrinoid protein	AKB53460.1	45.0741	7.74305	66.9536	25.5668	36.9293	11.0016	60.4545	6.36312	49.0337	8.38336	52.3788	10.3547	71.613	9.75726	82.1442	8.44361
hypothetical protein] [protein_id=AKB53461.1	435	hypothetical protein	AKB53461.1	4947.69	695.583	4464.8	646.215	4614.75	115.552	4570.89	612.678	3421.53	247.198	4551.71	380.128	3928.08	387.695	4611.54	651.219
Fe-S oxidoreductase] [protein_id=AKB53462.1	436	Fe-S oxidoreductase	AKB53462.1	69.9579	14.4743	64.4467	7.78371	48.2732	11.6174	56.9245	10.8808	76.5692	22.0673	59.6119	4.06291	55.7918	5.33496	60.4192	1.90169
CDP-diacylglycerol--glycerol-3-phosphate 3-phosphatidyltransferase] [protein_id=AKB53463.1	437	CDP-diacylglycerol--glycerol-3-phosphate 3-phosphatidyltransferase	AKB53463.1	17.4307	5.39269	15.3946	8.75061	20.0064	6.85864	19.3906	11.2887	15.5989	2.3257	23.542	14.1733	30.7875	9.35564	19.4857	7.64615
hypothetical protein] [protein_id=AKB53464.1	438	hypothetical protein	AKB53464.1	188.184	23.1112	200.924	47.408	240.251	17.8076	255.178	42.3676	249.255	52.9663	130.732	17.8478	218.637	93.1092	302.919	54.204
hypothetical protein] [protein_id=AKB53465.1	439	hypothetical protein	AKB53465.1	184.909	21.4397	164.424	17.5175	207.629	7.90448	218.427	35.5064	219.786	39.0266	140.089	25.5103	202.06	80.5044	229.326	18.9166
cell surface protein] [protein_id=AKB53466.1	440	cell surface protein	AKB53466.1	336.739	28.8988	342.668	37.5142	237.783	59.3051	306.215	7.62556	396.018	60.2807	317.864	44.3359	423.101	83.6973	329.902	59.8066
collagen triple helix repeat domain protein] [protein_id=AKB53467.1	441	collagen triple helix repeat domain protein	AKB53467.1	232.063	34.7869	233.894	55.9571	233.816	36.7691	201.951	33.1977	289.175	94.1338	198.36	30.2064	266.058	78.9939	275.832	20.4639
Cell surface protein] [protein_id=AKB53468.1	442	Cell surface protein	AKB53468.1	132.951	17.867	145.247	47.6421	116.868	15.667	109.005	5.35123	154.852	22.5725	110.301	6.20663	146.493	36.6503	133.021	32.5195
Replication factor-A protein 1] [protein_id=AKB53469.1	443	Replication factor-A protein 1	AKB53469.1	192.083	17.8723	241.615	38.1464	202.783	22.1281	205.248	20.5939	222.489	33.0663	212.179	24.902	192.924	2.39262	226.327	31.3264
Glycerol dehydrogenase] [protein_id=AKB53470.1	444	Glycerol dehydrogenase	AKB53470.1	77.0092	12.443	121.204	16.0133	110.757	28.8915	88.5015	7.09266	92.1218	6.86277	115.524	9.22774	86.6262	20.1821	99.1522	26.7914
D-3-phosphoglycerate dehydrogenase] [protein_id=AKB53471.1	445	D-3-phosphoglycerate dehydrogenase	AKB53471.1	2154.95	187.912	3074.39	623.395	2555.12	49.4977	2770.09	132.942	2072.73	235.651	3749.18	95.8095	2542.92	950.195	2440.15	420.404
hypothetical protein] [protein_id=AKB53472.1	446	hypothetical protein	AKB53472.1	15.8297	2.88085	11.587	8.52478	28.6038	1.51253	18.9491	7.20204	16.0034	5.67812	19.863	7.44095	15.274	1.82265	19.3788	2.08517
Pyruvate decarboxylase] [protein_id=AKB53473.1	447	Pyruvate decarboxylase	AKB53473.1	32.3384	5.94674	31.1836	8.1172	33.919	3.94219	33.5714	13.999	31.9785	5.26112	20.5876	7.42938	21.4013	9.0945	36.0195	13.6858
LSU ribosomal protein L18e] [protein_id=AKB53474.1	448	LSU ribosomal protein L18e	AKB53474.1	728.985	214.209	893.574	48.9672	802.595	74.8798	674.63	85.4081	1037.25	80.8326	773.222	153.324	934.773	245.622	892.96	59.3783
LSU ribosomal protein L13Ae (L13p)] [protein_id=AKB53475.1	449	LSU ribosomal protein L13Ae (L13p)	AKB53475.1	732.811	224.762	667.456	142.724	645.12	71.3194	628.195	35.3421	1058.04	140.844	546.913	38.3631	1091.92	459.827	940.271	253.808
SSU ribosomal protein S16e (S9p)] [protein_id=AKB53476.1	450	SSU ribosomal protein S16e (S9p)	AKB53476.1	872.37	105.721	793.006	56.8501	837.077	65.1898	770.689	24.8816	1089.47	79.1027	721.642	60.777	869.683	78.9323	843.51	61.8222
DNA-directed RNA polymerase subunit N] [protein_id=AKB53477.1	451	DNA-directed RNA polymerase subunit N	AKB53477.1	289.082	28.7675	437.817	32.8107	433.442	41.8373	416.797	118.96	586.643	31.4405	504.598	33.307	480.618	107.342	539.294	32.2914
DNA-directed RNA polymerase subunit K] [protein_id=AKB53478.1	452	DNA-directed RNA polymerase subunit K	AKB53478.1	122.995	32.8476	97.8472	36.4473	113.319	21.4462	120.257	47.9645	154.367	21.6956	74.839	23.8059	118.423	21.1214	117.593	10.0583
SSU ribosomal protein SAe (S2p)] [protein_id=AKB53479.1	453	SSU ribosomal protein SAe (S2p)	AKB53479.1	1310.04	165.226	1632.55	157.127	1558.8	44.3093	1571.71	154.954	1837.5	104.699	1484.08	75.3019	1598.33	193.104	1792.79	163.806
hypothetical protein] [protein_id=AKB53480.1	454	hypothetical protein	AKB53480.1	434.412	101.401	423.425	41.8845	504.297	23.4728	435.019	30.4257	594.679	64.3583	447.039	4.30863	373.258	64.639	470.707	145.651
Mevalonate kinase] [protein_id=AKB53481.1	455	Mevalonate kinase	AKB53481.1	176.256	56.6424	192.289	4.9846	239.857	38.3142	207.248	33.0032	234.277	20.4246	179.496	24.536	229.393	37.9116	250.844	13.8519
Isopentenyl phosphate kinase] [protein_id=AKB53482.1	456	Isopentenyl phosphate kinase	AKB53482.1	85.8446	46.2109	125.752	37.7273	159.413	9.02868	178.396	15.5276	156.021	23.0166	128.913	34.9103	139.123	28.1692	158.698	5.29013
Isopentenyl-diphosphate delta-isomerase, FMN-dependent] [protein_id=AKB53483.1	457	Isopentenyl-diphosphate delta-isomerase, FMN-dependent	AKB53483.1	113.826	10.9396	138.383	19.5528	196.598	39.321	195.067	15.8119	152.206	19.1827	148.987	3.83232	175.638	25.2493	188.091	12.8246
Putative Zn-dependent hydrolase in polyisoprenoid biosynthetic cluster] [protein_id=AKB53484.1	458	Putative Zn-dependent hydrolase in polyisoprenoid biosynthetic cluster	AKB53484.1	405.948	76.0009	585.027	62.4823	598.42	80.4942	523.003	32.3517	591.93	68.3795	614.958	34.2556	624.829	31.3402	651.112	33.1131
Geranylfarnesyl diphosphate synthase] [protein_id=AKB53485.1	459	Geranylfarnesyl diphosphate synthase	AKB53485.1	307.413	54.5618	418.799	26.6231	343.616	16.33	338.51	47.4529	368.081	43.9443	422.567	35.9555	442.477	24.5719	420.491	30.3938
Pyruvate,phosphate dikinase] [protein_id=AKB53486.1	460	Pyruvate,phosphate dikinase	AKB53486.1	3679.46	1099.27	4660.77	2292.8	4586.89	766.224	4499.82	132.129	3814.76	27.1925	6614.59	595.032	5181.1	916.576	4343.8	118.622
gar1 - like small nucleolar rnp] [protein_id=AKB53487.1	461	gar1 - like small nucleolar rnp	AKB53487.1	222.97	41.2489	173.351	30.9187	175.399	12.5693	221.633	28.8951	146.629	20.4357	178.812	11.1891	187.8	16.8279	177.241	24.1616
Transcription initiation factor B] [protein_id=AKB53488.1	462	Transcription initiation factor B	AKB53488.1	628.733	38.3093	607.079	131.757	547.154	30.6778	628.145	39.6013	648.12	87.878	519.902	56.3834	623.973	54.4611	601.358	40.8609
Transporter, LysE family] [protein_id=AKB53489.1	463	Transporter, LysE family	AKB53489.1	24.2374	3.27385	21.7757	4.41872	27.8899	4.72979	30.6824	5.73976	21.9007	7.75766	21.8705	4.75345	26.7777	8.66486	28.7068	9.33168
tRNA (Guanine37-N1) -methyltransferase] [protein_id=AKB53490.1	464	tRNA (Guanine37-N1) -methyltransferase	AKB53490.1	40.8618	10.5381	28.5137	8.39591	39.7669	1.80398	26.6714	14.8884	47.9053	12.3144	31.7451	10.5972	42.0422	1.63363	36.9371	10.5601
hypothetical protein] [protein_id=AKB53491.1	465	hypothetical protein	AKB53491.1	13.303	6.79679	14.2535	6.94253	21.9469	4.40729	28.0374	7.37309	23.7368	12.6547	16.393	5.81346	15.4226	2.07323	19.8337	5.89001
hypothetical protein] [protein_id=AKB53492.1	466	hypothetical protein	AKB53492.1	1.74919	0.812221	1.7902	0.282624	7.76152	1.87939	12.1288	9.59101	5.99013	2.99553	2.08865	1.53378	5.73551	1.68044	8.03758	0.967224
hypothetical protein] [protein_id=AKB53493.1	467	hypothetical protein	AKB53493.1	9.713	3.46691	11.8121	8.78649	23.6231	7.00925	13.3976	6.8536	9.95548	5.255	9.46086	3.28317	8.45346	2.45966	13.258	5.41238
hypothetical protein] [protein_id=AKB53494.1	468	hypothetical protein	AKB53494.1	34.1203	16.4158	29.3903	0.156021	37.6332	10.942	37.6623	10.359	33.4589	9.84127	29.1082	1.13743	30.8326	4.61947	33.2812	4.21603
Formate dehydrogenase chain D] [protein_id=AKB53495.1	469	Formate dehydrogenase chain D	AKB53495.1	14.1439	2.78798	3.64476	1.5154	8.69789	6.00398	12.088	1.04369	12.9711	4.24547	3.93056	0.959932	11.6917	10.0725	7.6885	1.62127
iron-sulfur flavoprotein] [protein_id=AKB53496.1	470	iron-sulfur flavoprotein	AKB53496.1	14.4135	9.63086	9.37184	4.30424	8.12395	3.78119	19.7353	15.2391	11.2518	1.68379	11.5381	4.16239	16.7565	3.75658	10.7915	9.05575
hypothetical protein] [protein_id=AKB53497.1	471	hypothetical protein	AKB53497.1	5.75645	5.79432	4.58859	3.03388	7.85013	0.601625	7.81011	6.84373	9.43777	2.22656	6.79993	2.56883	11.4384	2.71832	7.85829	6.80489
hypothetical protein] [protein_id=AKB53498.1	472	hypothetical protein	AKB53498.1	0.824743	1.4285	0.650832	1.12727	4.09458	1.26968	1.85762	0.919927	1.02909	0.928674	0	0	1.39157	1.62038	1.39423	1.62476
hypothetical protein] [protein_id=AKB53499.1	473	hypothetical protein	AKB53499.1	6.50845	3.00897	6.47609	2.75858	7.48325	2.7016	2.19026	3.03081	5.05097	3.53679	8.02256	4.5334	7.09511	3.82452	6.57364	2.81626
Nitroreductase family protein] [protein_id=AKB53500.1	474	Nitroreductase family protein	AKB53500.1	33.8525	3.11669	30.2058	4.32188	30.1271	4.97873	32.1181	0.693262	22.5342	0.846118	28.9513	5.44709	24.9034	4.82564	29.6115	4.18801
iron-sulfur flavoprotein] [protein_id=AKB53501.1	475	iron-sulfur flavoprotein	AKB53501.1	98.7048	35.2046	98.5858	12.4162	79.02	8.79799	94.2185	6.96624	109.527	17.9206	115.938	12.5622	94.4572	32.6861	68.3526	16.8832
Transcriptional regulator, HxlR family] [protein_id=AKB53502.1	476	Transcriptional regulator, HxlR family	AKB53502.1	15.8083	8.12543	13.9281	5.26922	18.8863	7.49019	18.4748	2.40031	14.9485	4.95683	22.8222	8.8059	11.6704	5.21358	20.5547	13.2829
DNA repair helicase] [protein_id=AKB53503.1	477	DNA repair helicase	AKB53503.1	109.595	18.4433	92.2784	15.7081	105.176	3.61677	115.246	12.6443	105.616	17.7695	85.8854	2.74918	121.498	32.582	137.082	20.9061
cell surface protein] [protein_id=AKB53504.1	478	cell surface protein	AKB53504.1	1136.98	157.04	1175.03	166.467	1106.51	176.681	1099.34	176.626	1274.28	338.819	1097.39	78.4801	1469.03	246.244	1287.13	265.554
cell surface protein] [protein_id=AKB53505.1	479	cell surface protein	AKB53505.1	662.127	88.8356	582.628	38.2185	500.258	69.058	424.007	131.913	614.674	155.282	568.505	13.4838	673.779	78.7279	556.231	133.016
hypothetical protein] [protein_id=AKB53506.1	480	hypothetical protein	AKB53506.1	250.386	35.4778	331.401	68.2267	282.334	26.8688	300.428	92.4846	278.988	18.0522	303.195	28.3081	250.836	60.5654	228.053	24.1358
hypothetical protein] [protein_id=AKB53507.1	481	hypothetical protein	AKB53507.1	137.322	5.21247	173.351	10.2855	203.653	18.3631	192.584	13.4935	189.738	34.6086	161.673	3.46127	159.729	17.316	159.936	24.1459
beta-ribofuranosylaminobenzene 5'-phosphate synthase] [protein_id=AKB53508.1	482	beta-ribofuranosylaminobenzene 5'-phosphate synthase	AKB53508.1	81.0952	9.79327	107.832	44.846	73.0238	4.8594	77.0852	10.1118	104.421	8.23791	80.6087	11.297	74.5779	14.6026	84.2377	11.5662
rRNA biogenesis protein Nop5/Nop56] [protein_id=AKB53509.1	483	rRNA biogenesis protein Nop5/Nop56	AKB53509.1	73.4457	12.0168	81.6872	25.4595	63.1136	15.0306	83.2332	26.964	103.009	24.1631	75.1188	4.04356	72.646	6.02338	76.2065	9.44738
Fibrillarin] [protein_id=AKB53510.1	484	Fibrillarin	AKB53510.1	37.1725	9.6287	32.0576	4.13524	22.6946	9.10508	28.9534	10.0108	26.1181	3.03432	29.8146	7.43012	31.0615	9.72033	23.4167	3.84814
Transcriptional regulator, ArsR family] [protein_id=AKB53511.1	485	Transcriptional regulator, ArsR family	AKB53511.1	19.5596	7.83055	18.908	5.76586	21.2076	8.6998	14.3002	8.53916	26.5176	10.1861	29.3199	10.5361	33.0178	7.65022	20.6155	4.8274
hypothetical protein] [protein_id=AKB53512.1	486	hypothetical protein	AKB53512.1	38.1631	8.38942	54.7124	10.5195	32.0507	6.95068	28.6811	8.82219	54.5453	34.7672	62.7737	19.0314	30.7367	45.6418	12.5896	8.03094
putative transporter PduT for various metalloporphyrins] [protein_id=AKB53513.1	487	putative transporter PduT for various metalloporphyrins	AKB53513.1	16.1491	3.91801	39.4822	4.91492	29.3903	5.6483	33.7571	11.1422	44.3915	25.2034	48.0533	11.388	22.2814	30.5442	7.37664	4.45125
hypothetical protein] [protein_id=AKB53514.1	488	hypothetical protein	AKB53514.1	19.2287	6.3135	27.3065	5.95797	21.7418	2.15884	29.2215	2.2631	38.5573	13.9942	25.0956	3.34981	14.8045	12.68	8.73096	4.29601
hypothetical protein] [protein_id=AKB53515.1	489	hypothetical protein	AKB53515.1	30.1304	12.3919	12.8221	4.51722	15.2343	3.86383	9.8386	4.15048	16.4785	0.908449	14.9575	3.0445	11.7657	3.43545	15.3551	7.71185
CobN-like chelatase BtuS for metalloporphyrine salvage] [protein_id=AKB53516.1	490	CobN-like chelatase BtuS for metalloporphyrine salvage	AKB53516.1	89.7073	26.4283	128.658	6.30337	120.174	15.3398	130.065	24.7309	156.11	25.9632	135.697	24.7165	108.338	47.7111	93.8961	18.4035
hypothetical protein] [protein_id=AKB53517.1	491	hypothetical protein	AKB53517.1	90.1913	25.5366	83.7899	30.2244	43.4015	8.97607	56.9428	15.7213	110.275	13.1431	66.4611	10.523	84.2669	11.0083	61.9503	15.9976
FmdE, Molybdenum formylmethanofuran dehydrogenase operon] [protein_id=AKB53518.1	492	FmdE, Molybdenum formylmethanofuran dehydrogenase operon	AKB53518.1	103.537	32.4603	103.828	33.5024	79.25	10.3459	85.9764	22.3256	129.971	24.6707	97.5108	25.3155	109.111	19.2006	81.1843	5.91661
hypothetical protein] [protein_id=AKB53519.1	493	hypothetical protein	AKB53519.1	1257.42	313.757	974.149	431.876	1395.76	88.7239	1458.21	184.478	697.442	55.4563	1513.93	77.4966	1028.28	389.831	1045.68	158.485
hypothetical protein] [protein_id=AKB53520.1	494	hypothetical protein	AKB53520.1	19.575	0.216157	9.46978	4.07734	25.6537	5.74934	23.9464	11.6234	15.292	4.30772	9.0705	2.87378	16.821	9.74177	17.4242	9.53764
Phosphoribosyl transferase domain protein] [protein_id=AKB53521.1	495	Phosphoribosyl transferase domain protein	AKB53521.1	80.1494	11.1192	88.3977	8.58284	87.8479	13.1859	100.735	12.419	80.0956	8.69313	83.7269	11.7842	75.4844	10.9881	67.7512	4.17073
sensory transduction histidine kinase] [protein_id=AKB53522.1	496	sensory transduction histidine kinase	AKB53522.1	77.903	37.3881	65.2244	18.5923	78.2449	22.9679	98.4479	5.57155	52.0996	24.9879	80.3911	2.37171	54.0266	20.5107	45.3035	2.42304
hypothetical protein] [protein_id=AKB53523.1	497	hypothetical protein	AKB53523.1	5.62842	5.90443	2.53856	2.36674	6.30987	4.00781	2.9933	1.45293	4.12424	1.22753	3.80606	0.893727	5.01339	2.63651	3.79744	3.66886
hypothetical protein] [protein_id=AKB53524.1	498	hypothetical protein	AKB53524.1	8.03206	4.22095	11.9096	6.96305	11.2726	4.12688	8.28569	3.28888	4.27844	1.50978	12.7767	2.34502	6.29967	4.27076	1.51823	0.626335
antigen] [protein_id=AKB53525.1	499	antigen	AKB53525.1	24.867	1.76111	26.7875	9.13784	26.727	13.4211	17.7308	7.02948	20.6701	5.38789	18.4594	2.39668	18.0252	2.69528	27.8261	16.2102
Iron-sulfur cluster-binding protein] [protein_id=AKB53526.1	500	Iron-sulfur cluster-binding protein	AKB53526.1	48.3745	6.6667	48.5268	4.38496	51.5124	9.68486	51.939	1.5439	49.2615	6.65285	35.5446	11.5917	47.6957	15.6254	78.2562	19.9453
hypothetical protein] [protein_id=AKB53527.1	501	hypothetical protein	AKB53527.1	22.3869	5.77461	10.2533	5.63055	11.8103	3.28533	11.3211	5.70259	10.8216	6.64478	3.71302	1.56978	9.37677	6.52923	13.8237	4.17566
Heat shock protein 60 family co-chaperone GroES] [protein_id=AKB53528.1	502	Heat shock protein 60 family co-chaperone GroES	AKB53528.1	86.4902	15.6473	123.03	42.9199	91.815	12.1804	145.895	21.5056	109.744	7.54573	85.4061	6.31671	111.645	23.2563	147.253	36.0045
Heat shock protein 60 family chaperone GroEL] [protein_id=AKB53529.1	503	Heat shock protein 60 family chaperone GroEL	AKB53529.1	752.961	76.4201	812.749	233.172	641.367	80.6006	634.261	92.8674	833.21	31.9468	699.671	119.485	1043.03	226.008	1102.5	249.456
hypothetical protein] [protein_id=AKB53530.1	504	hypothetical protein	AKB53530.1	14.1452	16.3399	11.8482	3.16158	13.7359	5.73332	11.7638	3.69144	9.72947	1.04807	9.47775	3.58044	5.47913	1.57961	13.4453	8.52188
2-phospho-L-lactate transferase] [protein_id=AKB53531.1	505	2-phospho-L-lactate transferase	AKB53531.1	179.632	58.1237	126.862	23.8145	112.88	20.6231	114.57	42.278	133.542	23.2508	128.332	22.2691	117.63	4.35745	115.599	7.7235
Putative dNTP triphosphohydrolase, Archaeal subgroup] [protein_id=AKB53532.1	506	Putative dNTP triphosphohydrolase, Archaeal subgroup	AKB53532.1	51.762	13.476	53.247	8.87014	63.7961	14.2745	47.7725	5.40623	66.3809	6.8538	44.067	11.125	64.7349	29.4887	71.6737	7.98566
hypothetical protein] [protein_id=AKB53533.1	507	hypothetical protein	AKB53533.1	9.34511	6.63208	2.57126	2.07157	4.19364	2.76199	2.19149	3.03003	3.15613	0.607755	3.50554	2.99134	3.68953	1.16228	5.05649	3.05176
UbiX family decarboxylase associated with menaquinone via futalosine] [protein_id=AKB53534.1	508	UbiX family decarboxylase associated with menaquinone via futalosine	AKB53534.1	23.1312	7.37181	25.4838	15.2391	27.7391	6.26376	24.3051	9.83224	23.6948	4.73944	20.3857	6.14585	25.6475	5.87251	25.3325	1.71363
hypothetical protein] [protein_id=AKB53535.1	509	hypothetical protein	AKB53535.1	5.2451	1.47417	4.32853	2.17439	12.7437	2.61287	12.7036	0.601717	7.05275	1.49709	4.92791	2.44359	3.53346	1.39853	5.31669	4.69585
hypothetical protein] [protein_id=AKB53536.1	510	hypothetical protein	AKB53536.1	103.298	16.92	82.1803	4.63951	115.967	5.60325	92.8981	9.23388	95.2502	9.21759	89.7657	9.45613	91.8955	8.44979	104.74	10.3062
Chitin binding protein] [protein_id=AKB53537.1	511	Chitin binding protein	AKB53537.1	547.026	57.2622	651.19	133.368	284.332	24.1508	553.256	91.4263	465.714	90.1349	569.275	72.6696	733.709	87.6254	795.721	53.7722
Hexosyltransferase] [protein_id=AKB53538.1	512	Hexosyltransferase	AKB53538.1	80.2532	32.8595	89.7933	29.0262	61.6073	10.1929	107.181	21.5655	71.8187	14.7094	104.152	14.6259	79.5606	12.4938	78.3659	13.1443
Glycosyltransferase] [protein_id=AKB53539.1	513	Glycosyltransferase	AKB53539.1	21.2109	6.28877	16.7274	7.9627	15.4409	2.69605	14.8187	6.87658	12.4705	3.71752	24.3116	1.97847	16.5829	9.14545	10.2731	3.94234
hypothetical protein] [protein_id=AKB53540.1	514	hypothetical protein	AKB53540.1	31.7627	13.9738	26.4305	5.14783	24.9936	3.52808	16.6184	0.90874	20.7283	8.51108	32.5914	8.50929	27.3895	11.7931	27.8675	12.3495
hypothetical protein] [protein_id=AKB53541.1	515	hypothetical protein	AKB53541.1	191.806	25.0096	144.673	29.7394	157.21	20.5317	156.483	14.9475	144.49	13.428	187.64	17.2102	169.287	29.0645	148.818	30.3672
Glycosyltransferase] [protein_id=AKB53542.1	516	Glycosyltransferase	AKB53542.1	50.2429	17.3657	41.8225	6.13062	38.2172	4.3343	34.1486	13.9104	28.2806	11.7195	45.3074	5.18426	37.5579	5.70729	32.6831	8.95804
putative glycosyltransferase] [protein_id=AKB53543.1	517	putative glycosyltransferase	AKB53543.1	53.359	21.1644	36.1587	12.7314	33.5601	2.3487	42.2797	7.35352	30.0056	3.04506	46.423	13.4848	33.9103	21.3025	27.3791	5.59037
hypothetical protein] [protein_id=AKB53544.1	518	hypothetical protein	AKB53544.1	143.066	38.8693	75.9642	25.3295	111.866	12.6936	103.91	10.6717	79.5904	5.43975	98.7574	1.80183	80.6075	15.0082	97.412	26.1793
ABC transporter] [protein_id=AKB53545.1	519	ABC transporter	AKB53545.1	92.3198	25.33	73.7883	22.5781	81.4012	15.7693	66.1265	23.4933	68.1128	13.2368	95.5671	10.1105	88.362	14.1596	74.9959	6.39318
O-antigen export system permease protein RfbD] [protein_id=AKB53546.1	520	O-antigen export system permease protein RfbD	AKB53546.1	56.6393	30.2734	48.296	19.0368	48.3677	6.17017	39.4455	15.871	31.6088	17.069	72.6171	6.95636	57.9807	20.6163	59.7928	6.70948
Mannosyltransferase WbkA] [protein_id=AKB53547.1	521	Mannosyltransferase WbkA	AKB53547.1	82.9307	31.3243	70.5927	10.802	67.8724	5.87463	75.0347	7.64724	55.3795	6.02285	77.9723	7.33014	83.4382	12.1179	85.4548	9.48604
Oligosaccharyl transferase] [protein_id=AKB53548.1	522	Oligosaccharyl transferase	AKB53548.1	245.494	39.956	238.933	31.9977	186.198	15.3302	224.617	30.5341	217.504	22.7167	282.266	19.6561	240.858	44.9029	210.57	24.0262
Kef-type K+ transport systems (NAD-binding component fused to domain related to exopolyphosphatase)] [protein_id=AKB53549.1	523	Kef-type K+ transport systems (NAD-binding component fused to domain related to exopolyphosphatase)	AKB53549.1	318.026	17.1036	260.752	72.8846	247.755	8.88163	207.518	35.1418	360.094	56.4997	223.132	44.0199	344.356	66.1146	369.672	44.9536
hypothetical protein] [protein_id=AKB53550.1	524	hypothetical protein	AKB53550.1	22.9199	9.67981	20.5679	11.9334	36.6007	12.5789	31.737	9.96905	21.2851	7.00466	23.6453	9.10017	19.4017	8.45551	31.45	10.0661
NAD(P)HX epimerase] [protein_id=AKB53551.1	525	NAD(P)HX epimerase	AKB53551.1	178.526	34.406	202.293	25.0516	243.289	36.3288	230.739	16.5396	223.767	27.3666	230.685	42.3248	247.951	14.2676	264.706	27.9083
hypothetical protein] [protein_id=AKB53552.1	526	hypothetical protein	AKB53552.1	10.2628	4.32104	14.0925	15.0269	13.6239	8.7855	11.3453	3.83877	13.5254	2.53548	6.21119	3.24338	6.93842	2.71101	11.1788	10.0936
Molybdenum cofactor biosynthesis enzyme] [protein_id=AKB53553.1	527	Molybdenum cofactor biosynthesis enzyme	AKB53553.1	58.6747	33.5288	77.4357	18.151	70.015	6.23447	73.9255	15.9828	67.1169	5.55138	69.1664	19.0787	90.9156	12.6129	80.3095	20.0552
Ribose-phosphate pyrophosphokinase] [protein_id=AKB53554.1	528	Ribose-phosphate pyrophosphokinase	AKB53554.1	165.412	80.7562	132.798	16.4682	145.96	28.2094	135.145	14.9409	172.633	11.4907	159.61	42.9217	197.819	1.85774	175.826	27.2648
hypothetical protein] [protein_id=AKB53555.1	529	hypothetical protein	AKB53555.1	82.2584	14.5257	61.5195	11.3033	70.473	14.7377	85.4899	29.6112	79.92	8.81145	69.2151	14.3514	102.454	23.8255	90.7742	12.2468
hypothetical protein] [protein_id=AKB53556.1	530	hypothetical protein	AKB53556.1	18.9395	3.62182	23.0115	2.61844	27.4429	7.16373	32.0949	7.86863	22.3188	4.89723	20.5439	6.33637	26.762	10.7197	29.5019	3.14933
Exonuclease SbcC] [protein_id=AKB53557.1	531	Exonuclease SbcC	AKB53557.1	99.5716	3.87191	73.4981	16.7563	65.7412	8.95115	61.7955	7.62747	103.818	15.2132	73.3195	17.2319	97.1251	9.27561	81.7101	18.4741
Exonuclease SbcD] [protein_id=AKB53558.1	532	Exonuclease SbcD	AKB53558.1	69.4981	33.1306	72.1558	4.30272	56.08	17.5349	63.5593	11.9747	75.2111	6.12839	74.0294	4.81187	73.2629	3.83593	72.4336	1.1976
cell surface protein] [protein_id=AKB53559.1	533	cell surface protein	AKB53559.1	8.56087	5.78574	6.18338	2.45536	11.9362	3.74162	10.8217	2.88996	10.7021	4.23077	10.9257	5.80834	17.4335	0.471426	13.0462	3.50236
hypothetical protein] [protein_id=AKB53560.1	534	hypothetical protein	AKB53560.1	1.61347	2.79461	0.780721	1.35225	1.74487	0.967599	1.84674	1.59933	1.52688	1.86777	1.10041	1.17746	1.8874	1.56903	0.97277	0.668665
intracellular protease, ThiJ/PfpI family] [protein_id=AKB53561.1	535	intracellular protease, ThiJ/PfpI family	AKB53561.1	7.08559	2.2274	6.11779	2.76131	8.13639	2.35365	4.96345	1.94871	7.24544	4.47511	5.74784	1.88836	4.36149	0.603615	8.7283	6.51575
hypothetical protein] [protein_id=AKB53562.1	536	hypothetical protein	AKB53562.1	2.39625	2.42056	0.423297	0.501467	1.38644	1.9297	2.59537	2.51505	0	0	1.3786	1.34072	2.68535	0.60437	1.05473	1.00799
Chitin binding protein] [protein_id=AKB53563.1	537	Chitin binding protein	AKB53563.1	591.263	122.13	569.896	94.1696	528.036	86.6348	478.627	25.7172	614.473	112.543	524.734	54.1232	578.671	33.0925	599.902	64.6078
hypothetical protein] [protein_id=AKB53564.1	538	hypothetical protein	AKB53564.1	3.12868	3.42535	2.66886	1.95559	3.54848	3.21963	3.5943	2.60852	5.55642	2.46443	3.27662	1.88202	3.32472	1.39984	4.20291	1.93973
hypothetical protein] [protein_id=AKB53565.1	539	hypothetical protein	AKB53565.1	19.8314	8.61214	13.8653	1.66957	24.2051	4.55416	21.7619	3.82249	22.6242	3.61699	15.0249	8.10966	17.7625	8.38095	29.653	8.09947
GTP-binding protein HflX] [protein_id=AKB53566.1	540	GTP-binding protein HflX	AKB53566.1	30.6287	15.104	25.6467	2.12979	45.0329	3.67521	41.2479	10.2319	43.4638	2.78133	27.0355	9.28369	41.8656	25.4943	45.8346	6.85713
hypothetical protein] [protein_id=AKB53567.1	541	hypothetical protein	AKB53567.1	18.3107	6.65289	15.7537	3.58621	12.117	5.06086	23.06	11.8151	16.6551	9.86494	12.4077	5.89526	6.42755	2.80864	9.56164	4.89665
tRNA-intron endonuclease] [protein_id=AKB53568.1	542	tRNA-intron endonuclease	AKB53568.1	83.0069	22.8192	87.8824	10.9248	101.194	25.7476	76.7306	17.7275	95.0858	19.2067	78.3216	5.89207	103.956	26.1975	109.48	18.4326
Cobyrinic acid A,C-diamide synthase] [protein_id=AKB53569.1	543	Cobyrinic acid A,C-diamide synthase	AKB53569.1	153.237	28.3536	168.048	12.6536	172.031	18.9053	182.171	12.376	186.185	12.0277	156.379	11.9821	175.998	8.57126	167.337	10.5121
nitrogenase reductase-like protein] [protein_id=AKB53570.1	544	nitrogenase reductase-like protein	AKB53570.1	76.2276	28.3222	61.4216	10.7262	71.7852	17.4615	76.6181	33.9507	85.5834	15.5355	61.783	19.3468	64.5004	13.6497	82.7189	23.9118
Nitrogenase-related protein] [protein_id=AKB53571.1	545	Nitrogenase-related protein	AKB53571.1	113.816	34.9657	100.735	23.1175	110.431	18.9444	117.025	27.1367	122.477	22.2552	92.5887	12.5126	151.958	43.1572	135.766	47.7542
UDP-N-acetylmuramoylalanine--D-glutamate ligase] [protein_id=AKB53572.1	546	UDP-N-acetylmuramoylalanine--D-glutamate ligase	AKB53572.1	246.127	17.4415	311.957	72.9387	200.811	28.7657	214.154	27.5204	342.464	47.1376	238.629	22.6391	256.421	28.5464	277.5	15.7479
Sirohydrochlorin cobaltochelatase] [protein_id=AKB53573.1	547	Sirohydrochlorin cobaltochelatase	AKB53573.1	160.545	7.67897	180.425	55.1235	107.039	2.21748	136.314	34.4337	214.188	7.24228	147.565	26.2245	166.035	0.940891	141.155	39.9917
Lead, cadmium, zinc and mercury transporting ATPase] [protein_id=AKB53574.1	548	Lead, cadmium, zinc and mercury transporting ATPase	AKB53574.1	138.714	14.5313	142.761	39.0199	51.8371	7.20322	77.5455	14.4688	158.3	52.1263	127.972	30.8408	112.931	41.7365	86.7686	16.9557
Nitrogen regulatory protein P-II] [protein_id=AKB53575.1	549	Nitrogen regulatory protein P-II	AKB53575.1	6.15868	1.85649	9.50266	3.08408	20.4808	10.065	13.5308	1.43236	8.30038	2.55247	9.42257	3.5463	8.60455	5.17003	10.4306	7.43225
Ammonium transporter] [protein_id=AKB53576.1	550	Ammonium transporter	AKB53576.1	88.4454	21.7457	80.9044	26.8063	206.724	22.7771	180.33	22.306	58.5932	16.0137	101.113	10.1099	131.278	27.3495	178.264	40.9666
hypothetical protein] [protein_id=AKB53577.1	551	hypothetical protein	AKB53577.1	49.1978	13.4666	27.5687	3.87427	36.9323	6.63482	30.6246	8.46128	37.1562	3.01767	23.4219	3.29479	33.1199	5.75173	32.4814	9.86198
hypothetical protein] [protein_id=AKB53578.1	552	hypothetical protein	AKB53578.1	9.65952	1.84106	9.30759	6.35987	7.46185	3.75273	7.06541	5.84037	6.636	1.14927	6.63394	1.90837	9.21881	0.734075	5.89358	3.84899
hypothetical protein] [protein_id=AKB53579.1	553	hypothetical protein	AKB53579.1	33.7503	4.85831	32.1939	10.3941	35.8401	7.62641	29.4053	4.12165	30.8747	8.60113	29.2446	13.118	36.2848	7.32898	33.8187	12.4035
Ribosomal protein S6] [protein_id=AKB53580.1	554	Ribosomal protein S6	AKB53580.1	126.718	48.8711	128.095	39.217	89.2215	13.8715	87.1815	19.1438	88.8812	18.5184	145.35	24.3963	73.2227	52.887	77.5357	29.3003
hypothetical protein] [protein_id=AKB53581.1	555	hypothetical protein	AKB53581.1	5.94709	2.58101	4.84878	1.90139	5.53179	2.96542	2.45861	3.48799	2.09191	1.94575	3.2059	3.09206	4.93756	2.64879	3.45313	3.10769
V-type ATP synthase subunit K] [protein_id=AKB53582.1	556	V-type ATP synthase subunit K	AKB53582.1	981.862	467.536	1034.49	167.181	562.494	72.7582	508.372	30.5231	687.081	116.859	892.404	47.3904	682.565	222.112	515.482	58.4871
Exonuclease SbcC] [protein_id=AKB53583.1	557	Exonuclease SbcC	AKB53583.1	46.3434	5.30222	34.8627	10.3286	37.0364	14.0287	39.534	5.11284	42.5595	9.39106	30.3267	9.73349	33.4114	8.22892	37.962	1.93028
Ribosomal protein S6] [protein_id=AKB53584.1	558	Ribosomal protein S6	AKB53584.1	38.1536	7.58701	26.4621	8.64325	27.2805	7.85032	27.0582	9.35963	17.8103	6.2588	21.3502	3.14906	24.7799	2.05264	24.7604	6.02391
[NiFe] hydrogenase metallocenter assembly protein HypF] [protein_id=AKB53585.1	559	[NiFe] hydrogenase metallocenter assembly protein HypF	AKB53585.1	183.62	4.54681	173.217	10.0822	159.692	13.0497	131.655	15.8145	179.13	30.6879	179.844	12.9222	174.105	14.6523	165.919	27.3965
V-type ATP synthase subunit D] [protein_id=AKB53586.1	560	V-type ATP synthase subunit D	AKB53586.1	956.337	497.073	855.647	127.531	591.837	78.0068	496.935	77.3813	629.424	45.0748	984.806	123.999	591.059	437.758	441.385	30.4396
V-type ATP synthase subunit B] [protein_id=AKB53587.1	561	V-type ATP synthase subunit B	AKB53587.1	2948.78	225.694	4065.64	222.996	2470	251.114	2878.03	402.169	3413.38	984.515	4242.83	365.378	3186.66	1096.24	2438.87	101.234
V-type ATP synthase subunit A] [protein_id=AKB53588.1	562	V-type ATP synthase subunit A	AKB53588.1	3517.23	295.288	5175.29	219.051	3275.5	408.456	3710.19	619.035	4022.23	1371.33	5418.47	424.467	3781.55	1706.62	2899.14	165.678
V-type ATP synthase subunit F] [protein_id=AKB53589.1	563	V-type ATP synthase subunit F	AKB53589.1	519.579	220.554	875.751	64.6437	486.028	156.116	662.751	66.9161	624.148	181.845	766.779	90.3014	807.019	143.97	566.427	84.4951
V-type ATP synthase subunit C] [protein_id=AKB53590.1	564	V-type ATP synthase subunit C	AKB53590.1	1648.43	145.521	2352.99	186.584	1478.79	222.085	1728.1	51.1683	1703.13	420.712	2505.77	63.0732	1797.45	643.903	1419.87	101.346
V-type ATP synthase subunit E] [protein_id=AKB53591.1	565	V-type ATP synthase subunit E	AKB53591.1	682.593	38.3579	949.607	105.977	598.821	3.42316	672.242	39.1338	708.733	216.233	902.665	38.8959	728.338	170.353	579.229	13.3211
V-type ATP synthase subunit K] [protein_id=AKB53592.1	566	V-type ATP synthase subunit K	AKB53592.1	986.405	471.93	1039.31	168.13	563.657	73.5974	510.845	30.067	690.58	118.305	896.524	44.9456	686.43	221.278	518.564	59.2895
V-type ATP synthase subunit I] [protein_id=AKB53593.1	567	V-type ATP synthase subunit I	AKB53593.1	6097.52	381.698	7562.02	409.573	4948.28	668.484	5358.7	313.859	6029	2096.6	7599.12	263.83	5940.61	1427.52	4943.31	235.9
V-type ATP synthase subunit G] [protein_id=AKB53594.1	568	V-type ATP synthase subunit G	AKB53594.1	568.281	65.5865	449.654	152.019	311.432	56.3715	341.219	22.5983	522.516	88.7429	408.491	116.147	528.617	45.0386	396.016	158.952
metallo cofactor biosynthesis protein] [protein_id=AKB53595.1	569	metallo cofactor biosynthesis protein	AKB53595.1	113.706	18.2236	110.802	27.8896	100.543	12.5684	104.698	1.20916	105.057	1.61418	109.604	25.8365	110.404	27.4488	90.1972	18.2654
Geranylfarnesyl diphosphate synthetase] [protein_id=AKB53596.1	570	Geranylfarnesyl diphosphate synthetase	AKB53596.1	88.9009	12.3158	86.182	16.1162	91.593	8.71972	75.7546	8.9544	78.1276	5.04282	92.8257	11.8566	74.5929	19.4653	81.7845	14.0311
Metallo-beta-lactamase family protein] [protein_id=AKB53597.1	571	Metallo-beta-lactamase family protein	AKB53597.1	90.7644	14.6102	68.4164	29.8607	66.8524	13.1276	79.1506	7.99876	65.3097	10.1026	83.9057	9.55048	61.9404	10.0209	58.0714	4.38525
Endonuclease III] [protein_id=AKB53598.1	572	Endonuclease III	AKB53598.1	20.5368	16.4986	18.4848	5.08336	24.435	5.81437	21.403	6.60332	7.84063	3.51805	16.409	6.3863	8.37574	2.03613	15.2274	8.73534
ADP-ribosylglycohydrolase] [protein_id=AKB53599.1	573	ADP-ribosylglycohydrolase	AKB53599.1	54.2232	16.0425	53.9909	15.0504	71.9415	9.68014	49.0482	14.5307	50.8017	7.16778	66.353	13.4234	59.9251	14.6079	56.6697	8.75383
hypothetical protein] [protein_id=AKB53600.1	574	hypothetical protein	AKB53600.1	70.8369	19.291	49.0128	11.3153	63.6543	7.88387	63.9504	20.3151	52.4481	4.62463	56.3083	6.12656	52.894	4.12888	52.8999	14.8113
hypothetical protein] [protein_id=AKB53601.1	575	hypothetical protein	AKB53601.1	41.6327	2.15935	45.9255	12.1898	38.8992	6.54996	44.9149	5.35359	45.6864	18.5491	56.0089	18.8787	41.0004	23.7487	42.4421	16.1554
hypothetical protein] [protein_id=AKB53602.1	576	hypothetical protein	AKB53602.1	33.9357	16.048	16.3718	6.59867	28.1597	5.0675	26.5703	10.5077	21.4362	9.15662	19.4466	2.73152	17.9769	1.62612	22.0853	3.7216
Proteasome-activating AAA-ATPase (PAN), archaeal] [protein_id=AKB53603.1	577	Proteasome-activating AAA-ATPase (PAN), archaeal	AKB53603.1	265.216	5.30477	334.9	42.8529	328.639	42.3199	323.565	64.0722	323.112	45.3847	352.53	14.2073	357.05	3.72968	365.345	45.929
hypothetical protein] [protein_id=AKB53604.1	578	hypothetical protein	AKB53604.1	3.66554	3.08243	7.26012	5.94214	4.03335	1.96188	4.94886	1.0243	3.19146	4.06622	5.26216	2.08809	5.45094	2.81357	7.50064	3.103
Adenylosuccinate synthetase] [protein_id=AKB53605.1	579	Adenylosuccinate synthetase	AKB53605.1	244.325	40.3585	236.566	36.035	167.105	27.4089	189.139	13.2808	254.088	45.957	228.71	50.5787	254.307	44.2918	225.697	45.3686
sensory transduction histidine kinase] [protein_id=AKB53606.1	580	sensory transduction histidine kinase	AKB53606.1	41.1605	13.7364	34.1754	4.88649	43.6375	9.47298	38.1104	10.9299	36.3462	11.3945	32.2143	2.67976	39.288	9.47575	43.0817	10.2599
ABC transporter multidrug efflux pump, fused ATP-binding domains] [protein_id=AKB53607.1	581	ABC transporter multidrug efflux pump, fused ATP-binding domains	AKB53607.1	0.274914	0.476166	0	0	0	0	0	0	0	0	0	0	0	0	0	0
MFS permease] [protein_id=AKB53608.1	582	MFS permease	AKB53608.1	20.9829	6.06273	26.0338	9.8646	33.0458	13.6664	34.5359	7.16459	28.7749	3.90737	28.7123	5.76501	39.6597	15.4112	56.9559	13.0761
hypothetical protein] [protein_id=AKB53609.1	583	hypothetical protein	AKB53609.1	21.9122	13.4721	18.9404	5.41652	19.0168	4.11743	20.2016	9.78475	20.931	3.45552	24.5324	6.20151	18.4765	11.5563	20.1961	9.40447
N5-methyltetrahydromethanopterin:coenzyme M methyltransferase subunit A] [protein_id=AKB53610.1	584	N5-methyltetrahydromethanopterin:coenzyme M methyltransferase subunit A	AKB53610.1	33.3643	19.626	21.3194	6.63182	41.2605	20.1052	35.1597	7.09501	19.566	2.44166	20.1508	7.42731	30.0823	6.08711	23.8606	11.0825
hypothetical protein] [protein_id=AKB53611.1	585	hypothetical protein	AKB53611.1	121.834	37.8009	119.964	30.1038	130.464	6.44625	169.691	6.49383	89.2753	27.346	130.198	20.4133	97.6516	15.909	114.483	20.0609
TPR repeat containing protein] [protein_id=AKB53612.1	586	TPR repeat containing protein	AKB53612.1	64.4511	5.91775	52.8925	7.14623	63.0321	19.4698	50.3013	12.034	68.5237	4.16656	55.2258	8.61552	59.6023	9.69326	61.4548	6.98506
VWFA-related Acidobacterial domain protein] [protein_id=AKB53613.1	587	VWFA-related Acidobacterial domain protein	AKB53613.1	29.7437	12.0965	15.1992	1.86318	22.2307	6.70789	21.058	3.663	21.1403	2.17981	19.552	2.015	22.0946	2.65595	18.1378	6.08405
hypothetical protein] [protein_id=AKB53614.1	588	hypothetical protein	AKB53614.1	31.8175	24.3057	35.7621	17.9971	31.9905	2.07018	47.1025	12.0739	36.1989	7.93438	48.9844	4.7363	31.017	15.3961	23.7807	14.9801
MoxR-like ATPase in aerotolerance operon] [protein_id=AKB53615.1	589	MoxR-like ATPase in aerotolerance operon	AKB53615.1	50.777	8.18079	37.1386	9.64397	40.8069	6.84698	57.1055	1.38751	48.3298	5.0884	56.3714	14.9582	47.7595	15.9501	38.6501	13.8711
Catalase] [protein_id=AKB53616.1	590	Catalase	AKB53616.1	264.644	74.6616	373.987	66.3629	304.854	48.7469	322.975	57.4352	403.666	61.9872	331.762	36.0768	357.667	21.8976	310.508	68.7557
polysaccharide deacetylase] [protein_id=AKB53617.1	591	polysaccharide deacetylase	AKB53617.1	16.7419	11.368	5.79232	4.14046	10.9879	2.18852	10.2012	3.95442	10.1539	2.12873	8.32216	2.38731	14.2397	9.41077	19.6188	5.65196
hypothetical protein] [protein_id=AKB53618.1	592	hypothetical protein	AKB53618.1	2.11888	2.98438	0.651414	1.12828	0.975728	0.140575	2.36438	1.57519	1.02001	0.886379	1.60752	2.01173	0.65441	0.567184	0.605589	0.533132
N-ethylmaleimide reductase] [protein_id=AKB53619.1	593	N-ethylmaleimide reductase	AKB53619.1	10.4961	7.1074	14.3853	1.56956	17.6412	8.90906	12.6346	8.08789	10.7203	3.05893	9.11518	6.10233	10.6781	4.0812	10.2178	3.17511
acetolactate synthase] [protein_id=AKB53620.1	594	acetolactate synthase	AKB53620.1	111.11	24.9914	163.553	37.4019	142.02	30.8483	164.572	16.2885	164.027	33.4768	154.389	27.3675	182.803	14.4843	156.888	17.7635
5-tetrahydromethanopterin:corrinoid iron-sulfur protein methyltransferase] [protein_id=AKB53621.1	595	5-tetrahydromethanopterin:corrinoid iron-sulfur protein methyltransferase	AKB53621.1	1561.37	353.812	2327.97	369.903	2257.19	136.617	1985.49	138.739	1715.19	237.952	2766.07	117.212	1765.95	791.324	1265.65	64.8786
CO dehydrogenase/acetyl-CoA synthase subunit delta, corrinoid iron-sulfur subcomplex small subunit] [protein_id=AKB53622.1	596	CO dehydrogenase/acetyl-CoA synthase subunit delta, corrinoid iron-sulfur subcomplex small subunit	AKB53622.1	1296.79	87.8117	1852.17	167.73	1843.93	193.804	1744.08	292.9	1499.93	147.634	2143.26	144.932	1601.3	503.576	1183.67	148.214
CO dehydrogenase accessory protein CooC (nickel insertion)] [protein_id=AKB53623.1	597	CO dehydrogenase accessory protein CooC (nickel insertion)	AKB53623.1	659.958	127.439	766.012	85.3079	789.968	43.2127	641.367	64.3844	628.681	19.9089	994.321	122.64	666.379	299.535	486.452	50.0762
CO dehydrogenase/acetyl-CoA synthase subunit beta, acetyl-CoA synthase] [protein_id=AKB53624.1	598	CO dehydrogenase/acetyl-CoA synthase subunit beta, acetyl-CoA synthase	AKB53624.1	1623.62	83.8777	2058.35	42.2509	2061.7	227.733	1869.64	401.1	1848.21	133.984	2402.01	335.006	2018.25	494.62	1378.19	287.405
CO dehydrogenase/acetyl-CoA synthase subunit epsilon, CO dehydrogenase subcomplex] [protein_id=AKB53625.1	599	CO dehydrogenase/acetyl-CoA synthase subunit epsilon, CO dehydrogenase subcomplex	AKB53625.1	361.679	26.4617	705.752	40.9708	598.464	33.5873	549.492	116.678	512.343	37.9946	743.101	48.3579	607.371	143.156	414.55	70.2853
CO dehydrogenase/acetyl-CoA synthase subunit alpha, CO dehydrogenase subcomplex] [protein_id=AKB53626.1	600	CO dehydrogenase/acetyl-CoA synthase subunit alpha, CO dehydrogenase subcomplex	AKB53626.1	2779.14	375.153	4179.62	436.438	3884.94	234.372	3942.26	755.571	3539.07	759.794	4969.15	414.204	3605.08	1471.14	2479.97	143.779
Mobile element protein] [protein_id=AKB53627.1	601	Mobile element protein	AKB53627.1	61.5394	7.78215	46.2141	10.6868	50.6487	17.3179	53.5196	23.0233	41.4057	16.1584	53.21	5.30127	59.5308	16.4224	54.9488	25.0896
hypothetical protein] [protein_id=AKB53628.1	602	hypothetical protein	AKB53628.1	5.55639	4.78084	5.33911	4.39789	6.2397	4.53196	5.63837	8.21568	6.41334	5.5859	4.3232	0.819954	3.30465	2.03478	4.8399	0.201176
HTH DNA-binding protein] [protein_id=AKB53629.1	603	HTH DNA-binding protein	AKB53629.1	6.50286	1.6876	6.28242	2.44731	9.595	0.426399	7.16458	5.23203	7.86519	1.02789	3.65009	2.59616	5.6296	3.8417	8.30577	5.40395
hypothetical protein] [protein_id=AKB53630.1	604	hypothetical protein	AKB53630.1	49891.2	2933.53	80506.2	13611.2	53695.1	839.608	67602.1	2333.25	67297.5	9620.86	69905.2	4413.68	68426.8	3398.65	76022.1	10320.9
hypothetical protein] [protein_id=AKB53631.1	605	hypothetical protein	AKB53631.1	1247.13	310.882	1184.64	289.009	1511.86	160.614	1488.4	265.27	985.101	72.7191	1447.11	66.1489	1184.09	163.872	1167.46	86.7044
Protein of unknown function DUF81] [protein_id=AKB53632.1	606	Protein of unknown function DUF81	AKB53632.1	26.5871	12.2218	16.4379	7.66786	20.1343	1.8982	19.5004	2.26724	13.2536	4.88299	13.7234	4.6251	15.1073	6.63725	18.3916	7.63955
Phosphinothricin N-acetyltransferase] [protein_id=AKB53633.1	607	Phosphinothricin N-acetyltransferase	AKB53633.1	15.5328	3.98555	12.0741	7.37338	28.4689	1.82558	28.8938	14.2565	6.33063	1.59525	14.5693	6.18293	13.7784	6.49838	16.553	3.05463
Molybdenum transport ATP-binding protein ModC] [protein_id=AKB53634.1	608	Molybdenum transport ATP-binding protein ModC	AKB53634.1	37.4194	9.67694	24.8628	13.6787	33.691	2.07798	22.1391	9.35044	26.0443	7.0446	33.0228	8.8707	32.1389	4.43177	24.3996	4.24957
Molybdenum transport system permease protein ModB] [protein_id=AKB53635.1	609	Molybdenum transport system permease protein ModB	AKB53635.1	50.207	14.5263	52.2955	23.2425	72.6598	36.9807	66.0236	8.70585	45.4759	14.7651	67.0018	10.5113	54.503	3.53701	68.6903	17.602
Molybdate-binding domain of ModE] [protein_id=AKB53636.1	610	Molybdate-binding domain of ModE	AKB53636.1	1241.77	190.525	1208.61	148.422	1074.61	292.533	766.917	312.456	938.784	219.874	1030.01	36.9899	1012.02	37.152	886.684	82.5874
Polyferredoxin protein MvhB] [protein_id=AKB53637.1	611	Polyferredoxin protein MvhB	AKB53637.1	1303.26	315.908	2075.92	393.507	2386.08	228.036	2254.12	112.806	1773.29	132.972	2277.4	199.877	2178.47	253.16	1990.79	44.6842
Formylmethanofuran dehydrogenase subunit A] [protein_id=AKB53638.1	612	Formylmethanofuran dehydrogenase subunit A	AKB53638.1	1313.42	114.605	1695.17	151.433	1919.46	123.541	1837.95	22.1127	1625.54	182.755	1794.87	78.3515	2008.3	259.833	1720.67	337.694
Formylmethanofuran dehydrogenase (molybdenum) subunit C] [protein_id=AKB53639.1	613	Formylmethanofuran dehydrogenase (molybdenum) subunit C	AKB53639.1	475.668	60.5571	646.386	20.7176	767.42	97.2717	832.622	190.044	545.006	56.4876	780.09	122.322	735.351	69.1312	641.901	109.921
Formylmethanofuran dehydrogenase (molybdenum) subunit D] [protein_id=AKB53640.1	614	Formylmethanofuran dehydrogenase (molybdenum) subunit D	AKB53640.1	220.321	19.1411	367.652	127.976	390.678	32.7393	352.316	29.7176	233.76	41.4449	455.683	65.9979	302.518	71.1599	298.908	41.7608
Formylmethanofuran dehydrogenase (molybdenum) subunit B] [protein_id=AKB53641.1	615	Formylmethanofuran dehydrogenase (molybdenum) subunit B	AKB53641.1	695.599	112.015	1102.68	169.769	1336.82	46.8846	1402.41	304.815	909.811	97.9874	1278.73	32.0719	1105.56	122.439	1011.87	12.5102
Hemerythrin HHE cation binding domain protein] [protein_id=AKB53642.1	616	Hemerythrin HHE cation binding domain protein	AKB53642.1	343.653	60.8959	389.929	101.716	372.784	25.6738	363.523	48.5049	379.06	48.1804	293.61	6.83092	354.658	65.7309	311.479	91.1761
hypothetical protein] [protein_id=AKB53643.1	617	hypothetical protein	AKB53643.1	11.5724	3.28763	13.2477	4.02632	21.2863	4.89205	23.5446	3.73606	23.1999	3.35381	15.6899	1.16548	21.7642	4.93122	29.3688	8.47047
Formylmethanofuran dehydrogenase (tungsten) subunit D] [protein_id=AKB53644.1	618	Formylmethanofuran dehydrogenase (tungsten) subunit D	AKB53644.1	59.5257	11.3744	31.2496	14.4582	35.0521	12.276	29.7585	6.55114	35.049	2.46079	30.221	13.5582	51.174	12.9503	39.9139	8.12633
Formylmethanofuran dehydrogenase subunit B] [protein_id=AKB53645.1	619	Formylmethanofuran dehydrogenase subunit B	AKB53645.1	507.136	59.246	400.685	64.7437	318.713	26.9399	371.7	45.2199	463.894	36.5414	409.338	64.1661	582.882	149.85	556.154	64.9183
Formylmethanofuran dehydrogenase subunit A] [protein_id=AKB53646.1	620	Formylmethanofuran dehydrogenase subunit A	AKB53646.1	638.399	104.652	496.615	15.3445	398.486	31.3656	418.78	26.9561	582.417	48.1902	490.752	8.60733	653.428	198.84	548.85	37.604
Formylmethanofuran dehydrogenase subunit C] [protein_id=AKB53647.1	621	Formylmethanofuran dehydrogenase subunit C	AKB53647.1	220.493	17.9948	167.592	53.8051	125.148	12.0975	126.046	12.6453	159.862	12.7937	157.379	36.6673	204.979	44.0282	172.386	17.1705
ABC transporter, permease protein] [protein_id=AKB53648.1	622	ABC transporter, permease protein	AKB53648.1	17.8762	3.31678	21.9032	2.89423	11.1353	3.76431	13.4596	5.53916	12.5345	4.20855	25.2337	2.4083	16.5534	6.54256	12.6199	1.35169
ABC transporter, ATP-binding protein] [protein_id=AKB53649.1	623	ABC transporter, ATP-binding protein	AKB53649.1	17.0381	6.20892	22.7828	3.9423	18.7176	8.42758	19.9406	2.21389	19.4391	2.73095	19.646	7.66671	25.2632	1.42548	20.3617	6.37442
Transmembrane component of general energizing module of ECF transporters] [protein_id=AKB53650.1	624	Transmembrane component of general energizing module of ECF transporters	AKB53650.1	27.357	6.11753	21.8374	5.88237	22.8126	6.21755	22.3255	5.05661	23.6779	1.71417	27.0789	4.5528	25.329	5.57885	20.7538	1.12265
ATPase component of general energizing module of ECF transporters] [protein_id=AKB53651.1	625	ATPase component of general energizing module of ECF transporters	AKB53651.1	58.9224	8.77809	34.9563	22.2899	42.4631	10.7614	29.3764	7.86918	47.4089	22.682	51.3918	5.98837	33.8032	10.5753	33.6467	8.96952
hypothetical protein] [protein_id=AKB53652.1	626	hypothetical protein	AKB53652.1	57.7255	9.62565	50.9355	3.14529	42.7643	7.77189	41.1549	12.5887	57.6666	10.5051	53.0295	2.77171	45.0548	7.72007	40.8175	4.32577
CobN component of cobalt chelatase involved in B12 biosynthesis] [protein_id=AKB53653.1	627	CobN component of cobalt chelatase involved in B12 biosynthesis	AKB53653.1	186.486	10.8484	177.326	43.5435	103.624	27.2329	120.909	16.9217	202.805	20.9374	154.548	22.3546	146.375	11.5029	127.83	23.9793
PQQ enzyme repeat domain protein] [protein_id=AKB53654.1	628	PQQ enzyme repeat domain protein	AKB53654.1	69.8961	15.8499	59.4653	6.57283	44.2732	9.54153	52.331	9.97984	69.2772	20.7556	66.8684	12.7969	50.3778	23.3518	37.0531	4.61209
PQQ enzyme repeat domain protein] [protein_id=AKB53655.1	629	PQQ enzyme repeat domain protein	AKB53655.1	92.2689	22.3781	102.593	20.6971	56.3155	5.15114	76.9772	7.41365	142.818	9.59805	80.9188	16.5658	95.2127	17.7347	61.8635	12.9824
hypothetical protein] [protein_id=AKB53656.1	630	hypothetical protein	AKB53656.1	81.1339	26.4476	89.3807	12.5749	74.457	8.96787	36.5555	14.8904	98.5773	9.68227	82.413	19.6939	55.9629	7.64248	40.4136	8.07851
hypothetical protein] [protein_id=AKB53657.1	631	hypothetical protein	AKB53657.1	251.32	81.8844	234.242	7.71375	147.544	22.9807	185.66	13.7473	255.387	58.6047	268.488	37.1994	219.057	78.164	135.368	27.2902
ChlI component of cobalt chelatase involved in B12 biosynthesis] [protein_id=AKB53658.1	632	ChlI component of cobalt chelatase involved in B12 biosynthesis	AKB53658.1	404.614	25.0234	414.62	72.5983	215.115	25.3142	247.141	40.2059	382.967	81.9469	409.2	65.9821	315.192	141.877	219.245	38.5594
Type II secretory pathway, ATPase PulE/Tfp pilus assembly pathway, ATPase PilB] [protein_id=AKB53659.1	633	Type II secretory pathway, ATPase PulE/Tfp pilus assembly pathway, ATPase PilB	AKB53659.1	59.8262	8.4726	47.8119	21.076	56.3872	4.90785	52.4181	8.55009	30.7232	5.6748	54.1508	11.4033	38.2687	14.3496	38.6298	5.9714
photosystem I assembly protein Ycf3] [protein_id=AKB53660.1	634	photosystem I assembly protein Ycf3	AKB53660.1	72.9714	13.5523	64.9939	9.41886	100.121	11.5371	96.015	24.1756	57.9151	19.6755	65.361	9.96062	51.2686	6.13736	65.3101	18.3437
Archaeal DNA polymerase I] [protein_id=AKB53661.1	635	Archaeal DNA polymerase I	AKB53661.1	161.74	25.275	162.539	11.3062	178.973	7.80286	133.671	34.8523	173.239	23.21	157.41	6.71746	178.5	23.0512	197.644	11.0418
Phosphate ABC transporter, periplasmic phosphate-binding protein PstS] [protein_id=AKB53662.1	636	Phosphate ABC transporter, periplasmic phosphate-binding protein PstS	AKB53662.1	867.41	148.858	1055.26	133.95	689.265	49.1542	827.705	33.5653	931.622	117.762	1143.61	14.1732	1006.15	108.812	997.509	67.5667
Phosphate transport system permease protein PstC] [protein_id=AKB53663.1	637	Phosphate transport system permease protein PstC	AKB53663.1	159.135	59.6099	147.988	12.4656	86.4565	2.60205	112.034	23.3898	111.317	34.0015	162.309	10.5785	104.598	60.1826	86.9569	13.4242
Phosphate transport system permease protein PstA] [protein_id=AKB53664.1	638	Phosphate transport system permease protein PstA	AKB53664.1	86.7191	23.7026	82.5073	3.79713	57.9388	5.83833	77.4382	5.11357	67.1855	30.8685	93.2099	19.0271	79.8822	30.5035	61.798	3.60249
Phosphate transport ATP-binding protein PstB] [protein_id=AKB53665.1	639	Phosphate transport ATP-binding protein PstB	AKB53665.1	60.4033	13.6383	47.2579	9.86469	36.4514	5.08003	46.6637	6.11068	51.7848	15.0572	63.2105	5.95923	52.2283	11.5732	39.1018	7.6507
Phosphate transport system regulatory protein PhoU] [protein_id=AKB53666.1	640	Phosphate transport system regulatory protein PhoU	AKB53666.1	47.1188	1.9354	46.9018	2.59306	31.4707	7.11711	31.2787	1.65415	36.1552	13.1413	60.2367	12.362	47.1277	17.4383	35.6131	1.7647
Dihydroorotase] [protein_id=AKB53667.1	641	Dihydroorotase	AKB53667.1	50.2803	14.1346	51.9801	9.74383	49.1613	6.3647	70.7658	27.9775	64.0063	12.0164	56.2993	1.13074	62.4269	10.5261	66.1515	16.8282
putative RNA-processing protein] [protein_id=AKB53668.1	642	putative RNA-processing protein	AKB53668.1	123.618	18.3385	142.525	8.71443	152.998	11.2065	172.483	26.1736	169.965	23.6361	157.821	23.0527	164.532	12.3566	162.883	13.8043
Serine/threonine protein kinase] [protein_id=AKB53669.1	643	Serine/threonine protein kinase	AKB53669.1	127.767	51.6579	131.034	17.5687	113.708	13.0432	103.866	3.84687	140.321	11.3397	116.898	7.40295	122.511	12.6192	122.392	3.90712
Translation initiation factor 1A] [protein_id=AKB53670.1	644	Translation initiation factor 1A	AKB53670.1	17.3065	0.704297	26.4313	12.0908	22.3964	10.751	23.0744	15.4494	21.9984	2.74688	17.7935	11.4762	15.017	4.88929	20.0418	9.57907
Cell division protein FtsH] [protein_id=AKB53671.1	645	Cell division protein FtsH	AKB53671.1	315.93	54.7953	261.756	60.7149	241.603	48.619	234.006	36.1089	227.668	10.5593	258.643	30.6127	222.49	35.9066	206.109	17.3564
hypothetical protein] [protein_id=AKB53672.1	646	hypothetical protein	AKB53672.1	28.6925	12.729	15.035	5.89188	24.1328	7.56525	29.8396	0.496818	18.5749	2.38198	19.0527	5.92777	33.1174	7.1379	34.445	10.3139
Ribonuclease Z] [protein_id=AKB53673.1	647	Ribonuclease Z	AKB53673.1	60.6167	14.2177	89.2766	8.09623	79.1076	17.5826	93.8085	9.11018	75.5797	10.4005	87.4027	11.3969	91.4304	21.2511	82.803	15.4827
1,4-alpha-glucan branching enzyme] [protein_id=AKB53674.1	648	1,4-alpha-glucan branching enzyme	AKB53674.1	20.5898	9.51771	22.9438	5.12982	24.549	3.23633	33.2815	6.08386	27.069	2.84082	23.3963	5.48058	26.4705	8.54372	30.324	4.65448
Uroporphyrinogen-III methyltransferase] [protein_id=AKB53675.1	649	Uroporphyrinogen-III methyltransferase	AKB53675.1	40.7798	19.1003	43.588	16.186	34.4417	12.3787	40.4412	5.22378	46.5848	2.41652	30.9246	8.31861	48.8929	22.4646	46.5392	12.8876
Uroporphyrinogen-III synthase] [protein_id=AKB53676.1	650	Uroporphyrinogen-III synthase	AKB53676.1	62.8958	16.1213	66.6261	4.70872	63.6285	3.3707	73.5886	9.14655	72.9147	8.37561	68.8393	6.62911	78.675	9.66455	59.7339	13.9116
radical SAM domain protein] [protein_id=AKB53677.1	651	radical SAM domain protein	AKB53677.1	222.259	19.1721	199.328	37.8881	189.78	5.42708	184.36	22.1518	197.969	21.631	215.819	51.1401	212.878	34.9388	216.199	14.618
Phosphotransferase enzyme family protein] [protein_id=AKB53678.1	652	Phosphotransferase enzyme family protein	AKB53678.1	12.8466	4.6459	7.84206	5.21709	12.8567	5.8004	9.38503	3.89832	11.5634	3.19313	12.6084	1.12669	12.6263	2.34796	9.20194	1.86672
IAA acetyltransferase] [protein_id=AKB53679.1	653	IAA acetyltransferase	AKB53679.1	3.87365	2.54187	4.23274	3.94863	4.86172	0.475253	3.82653	1.72381	5.39914	1.02128	2.88626	2.54262	5.57944	2.06943	3.32541	1.48098
hypothetical protein] [protein_id=AKB53680.1	654	hypothetical protein	AKB53680.1	155.649	10.9658	141.346	27.5505	199.608	31.1259	175.521	26.4737	147.522	29.643	153.285	17.2695	159.328	16.6047	182.512	23.1349
haloacid dehalogenase-like hydrolase] [protein_id=AKB53681.1	655	haloacid dehalogenase-like hydrolase	AKB53681.1	240.327	60.1836	237.329	17.9912	273.132	15.7835	282.128	27.2325	210.629	7.25397	234.688	23.7483	220.792	27.727	251.476	46.0997
hypothetical protein] [protein_id=AKB53682.1	656	hypothetical protein	AKB53682.1	105.497	15.3226	157.018	38.2081	80.0141	20.1395	120.793	17.1691	134.007	7.43062	147.897	29.9414	114.502	47.5411	80.2525	12.4764
Ribosomal RNA adenine dimethylase] [protein_id=AKB53683.1	657	Ribosomal RNA adenine dimethylase	AKB53683.1	133.917	34.7053	127.324	11.491	71.1818	20.236	91.1154	19.6013	128.845	42.0195	110.661	9.13356	96.467	14.0046	77.2809	26.7628
Oligopeptide transport system permease protein OppB] [protein_id=AKB53684.1	658	Oligopeptide transport system permease protein OppB	AKB53684.1	95.5314	29.3819	112.557	25.044	65.4494	17.5112	82.039	12.9732	150.065	3.07361	88.2367	6.44719	77.4583	8.60716	65.2112	3.28032
Oligopeptide transport ATP-binding protein OppF] [protein_id=AKB53685.1	659	Oligopeptide transport ATP-binding protein OppF	AKB53685.1	62.3308	10.91	67.8986	11.4595	57.2708	8.57202	46.3187	6.69209	96.1646	17.8076	58.5256	8.99962	53.1291	13.757	50.4376	14.6351
Oligopeptide ABC transporter, periplasmic oligopeptide-binding protein OppA] [protein_id=AKB53686.1	660	Oligopeptide ABC transporter, periplasmic oligopeptide-binding protein OppA	AKB53686.1	112.376	7.23365	126.447	28.254	98.3887	10.4505	108.274	7.62139	151.498	4.91627	93.3174	18.0804	102.011	2.26559	100.057	8.57504
Oligopeptide transport system permease protein OppB] [protein_id=AKB53687.1	661	Oligopeptide transport system permease protein OppB	AKB53687.1	42.939	11.1101	36.2268	4.46572	31.9318	14.3875	22.607	14.3606	31.7277	3.15218	30.4252	5.86035	22.9301	0.959264	24.0383	4.23412
Oligopeptide transport system permease protein OppC] [protein_id=AKB53688.1	662	Oligopeptide transport system permease protein OppC	AKB53688.1	14.9242	3.19485	18.227	1.13915	16.0084	6.29876	8.66657	0.982449	13.0493	6.12082	13.2446	5.75392	6.53598	0.449303	15.137	7.91559
Valyl-tRNA synthetase] [protein_id=AKB53689.1	663	Valyl-tRNA synthetase	AKB53689.1	637.715	207.047	859.487	68.2052	594.321	43.3958	683.692	140.566	938.729	117.884	873.271	69.6286	932.422	16.4138	869.193	60.9523
hypothetical protein] [protein_id=AKB53690.1	664	hypothetical protein	AKB53690.1	115.023	28.4929	67.3081	13.053	63.6931	10.4742	51.062	12.4879	86.8693	13.9839	84.9788	7.61987	94.0555	3.31096	63.459	24.5309
Hydroxymethylglutaryl-CoA reductase] [protein_id=AKB53691.1	665	Hydroxymethylglutaryl-CoA reductase	AKB53691.1	219.029	45.0649	225.261	3.92185	278.219	43.4205	296.692	27.8767	227.859	50.5956	242.639	19.0719	324.835	69.9676	349.739	37.838
Flagellin FlaB1] [protein_id=AKB53692.1	666	Flagellin FlaB1	AKB53692.1	1.27175	0.443926	5.92587	6.07292	11.2109	3.7025	9.70308	2.02843	2.34989	0.77857	4.89644	0.852757	3.32472	1.39984	6.91792	6.1889
hypothetical protein] [protein_id=AKB53693.1	667	hypothetical protein	AKB53693.1	4.60397	3.79835	2.44068	1.75885	4.72481	1.98578	3.30171	1.97662	4.33491	1.89344	2.10777	2.20106	2.41331	2.17647	3.76708	1.67637
hypothetical protein] [protein_id=AKB53694.1	668	hypothetical protein	AKB53694.1	2.59038	1.26947	1.52914	1.36753	4.90203	1.94181	2.56867	3.41996	1.53765	0.794172	1.84191	0.841546	2.9618	4.32609	2.97364	2.60848
hypothetical protein] [protein_id=AKB53695.1	669	hypothetical protein	AKB53695.1	3.84009	3.80371	5.50083	1.54596	5.52931	4.0781	9.30144	4.06326	2.59568	1.4212	1.91032	1.64173	2.25724	3.1162	2.10677	2.50427
Flagella-related protein FlaH] [protein_id=AKB53696.1	670	Flagella-related protein FlaH	AKB53696.1	18.0524	10.9595	29.7432	12.0869	24.8208	2.18193	25.8256	1.78152	23.1359	5.25196	35.909	7.67707	19.6098	17.9027	21.6552	11.7794
Flagella-related protein FlaI] [protein_id=AKB53697.1	671	Flagella-related protein FlaI	AKB53697.1	14.9658	12.6604	22.2615	6.0838	21.2445	6.95825	27.5308	10.3786	18.7463	8.06543	25.2921	4.53709	19.2908	2.8943	16.9915	3.72693
Flagella-related protein FlaJ] [protein_id=AKB53698.1	672	Flagella-related protein FlaJ	AKB53698.1	20.1319	10.4679	19.1681	6.99633	17.7917	9.18182	13.4267	2.88026	14.6571	3.44445	15.1613	11.2994	16.648	2.90793	17.8212	4.32999
hypothetical protein] [protein_id=AKB53699.1	673	hypothetical protein	AKB53699.1	22.7276	10.8536	17.0554	2.77463	15.4284	5.10716	12.1642	3.07489	18.7444	6.88666	15.9097	2.12152	10.7596	7.12993	8.46595	4.49298
hypothetical protein] [protein_id=AKB53700.1	674	hypothetical protein	AKB53700.1	51.2149	21.5271	39.1863	7.02132	40.8541	5.68517	53.6406	8.88801	31.0227	6.46598	45.9371	17.0075	27.4352	1.20791	30.0819	2.73677
hypothetical protein] [protein_id=AKB53701.1	675	hypothetical protein	AKB53701.1	34.621	5.43305	69.0948	20.7588	69.3663	7.74753	69.1052	21.9147	33.9068	2.79527	63.3963	23.9592	52.4514	5.05624	49.0424	8.83272
Coenzyme B synthesis from 2-oxoglutarate: steps 4, 7, 8, 11, and 12 (large subunit)] [protein_id=AKB53702.1	676	Coenzyme B synthesis from 2-oxoglutarate: steps 4, 7, 8, 11, and 12 (large subunit)	AKB53702.1	78.8224	7.35667	81.1377	7.65597	71.0599	4.11355	64.6303	15.2048	68.9406	6.49293	79.4106	5.06673	106.709	27.3974	104.122	10.8928
sensory transduction histidine kinase] [protein_id=AKB53703.1	677	sensory transduction histidine kinase	AKB53703.1	76.6093	24.799	63.6953	3.24534	59.0649	10.6538	71.2713	4.99491	69.0743	12.0867	68.4946	12.1145	69.9469	12.7079	68.9922	13.7755
Nitroreductase family protein] [protein_id=AKB53704.1	678	Nitroreductase family protein	AKB53704.1	28.6487	6.31044	23.4346	6.40303	27.763	6.18992	37.7372	7.43942	40.482	7.23514	20.9329	2.94307	23.2618	8.32408	16.4158	3.42887
hypothetical protein] [protein_id=AKB53705.1	679	hypothetical protein	AKB53705.1	4.27276	3.75457	5.27149	2.87444	5.64977	1.39264	1.45127	1.30043	3.62497	1.70895	7.47304	1.01197	4.09259	4.0152	3.94641	2.76873
hypothetical protein] [protein_id=AKB53706.1	680	hypothetical protein	AKB53706.1	62.3093	26.6472	56.1771	24.9391	53.4147	6.99614	48.965	12.7017	57.875	8.78982	44.9268	12.7361	57.6585	4.80092	41.0139	15.2133
hypothetical protein] [protein_id=AKB53707.1	681	hypothetical protein	AKB53707.1	16.8843	3.19479	24.639	15.0404	13.6224	0.921952	14.4657	1.42591	15.97	1.06925	15.3397	7.49006	17.9449	5.22502	17.4811	6.06073
hypothetical protein] [protein_id=AKB53708.1	682	hypothetical protein	AKB53708.1	53.8753	17.9786	47.0328	13.6985	40.0198	2.01743	29.1657	9.97063	43.9599	9.49617	58.1626	4.34306	39.9674	15.2575	36.0403	6.53424
CoB--CoM heterodisulfide reductase subunit B] [protein_id=AKB53709.1	683	CoB--CoM heterodisulfide reductase subunit B	AKB53709.1	78.1659	34.5479	64.5168	27.0369	22.507	3.47642	20.2443	4.65961	80.1201	5.04273	24.9195	7.33476	68.2991	45.3318	59.579	14.9894
CoB--CoM heterodisulfide reductase subunit C] [protein_id=AKB53710.1	684	CoB--CoM heterodisulfide reductase subunit C	AKB53710.1	83.5201	46.6539	52.3833	36.7384	19.7844	4.07412	21.2514	6.60423	70.5134	12.7799	17.0156	6.87457	67.2716	36.9967	67.2282	25.4852
CoB--CoM heterodisulfide reductase subunit A] [protein_id=AKB53711.1	685	CoB--CoM heterodisulfide reductase subunit A	AKB53711.1	517.893	250.945	294.745	200.018	69.0303	9.34905	102.815	26.7102	449.501	85.9117	70.0214	9.17411	369.674	254.772	412.373	141.047
hypothetical protein] [protein_id=AKB53712.1	686	hypothetical protein	AKB53712.1	82.4545	28.692	66.2046	7.72297	67.2496	5.0042	63.3618	22.1231	70.8863	14.4995	60.0547	5.3887	93.3485	23.7928	91.7895	19.6776
hypothetical protein] [protein_id=AKB53713.1	687	hypothetical protein	AKB53713.1	155.552	11.2786	98.6837	1.61982	84.0221	16.9986	98.4373	17.6127	130.63	25.3548	101.265	6.83952	88.6052	7.24114	107.432	31.4525
Cytosine deaminase] [protein_id=AKB53714.1	688	Cytosine deaminase	AKB53714.1	27.0198	7.14394	20.2752	5.53481	45.8428	4.31954	22.0596	8.63362	26.9849	5.72877	20.7682	8.88254	23.4228	15.1835	27.1562	16.2524
hypothetical protein] [protein_id=AKB53715.1	689	hypothetical protein	AKB53715.1	22.9199	9.67981	20.5679	11.9334	36.6007	12.5789	31.737	9.96905	21.2851	7.00466	23.6453	9.10017	19.4017	8.45551	31.45	10.0661
collagen triple helix repeat domain protein] [protein_id=AKB53716.1	690	collagen triple helix repeat domain protein	AKB53716.1	164.348	6.34013	196.886	18.8185	247.491	15.003	214.937	75.0957	174.137	8.21578	184.965	13.9123	157.974	53.6525	142.791	40.1882
sensory transduction histidine kinase] [protein_id=AKB53717.1	691	sensory transduction histidine kinase	AKB53717.1	7.69628	2.87544	3.84087	2.05127	9.24502	3.14714	6.21637	2.77047	2.13613	0.632137	1.54914	0.518483	2.02843	1.02939	2.76186	0.65109
sensory transduction histidine kinase] [protein_id=AKB53718.1	692	sensory transduction histidine kinase	AKB53718.1	5.53892	3.06822	3.54711	2.92771	2.84057	2.54975	3.73106	1.90329	5.15953	1.4297	4.48919	1.99967	3.33976	0.437136	1.1005	1.66216
hypothetical protein] [protein_id=AKB53719.1	693	hypothetical protein	AKB53719.1	3.22904	2.94691	2.86427	2.51068	2.13066	2.95213	7.95428	1.41209	2.52394	1.72309	4.13257	1.99661	2.52425	0.556652	4.48336	3.17393
FKBP-type peptidyl-prolyl cis-trans isomerase SlyD] [protein_id=AKB53720.1	694	FKBP-type peptidyl-prolyl cis-trans isomerase SlyD	AKB53720.1	41.2525	3.68646	39.0888	1.69636	45.4754	3.42993	50.9508	12.1944	39.6453	8.98385	45.7808	6.05485	46.6802	4.52182	38.525	13.9646
FKBP-type peptidyl-prolyl cis-trans isomerase SlyD] [protein_id=AKB53721.1	695	FKBP-type peptidyl-prolyl cis-trans isomerase SlyD	AKB53721.1	47.3476	11.2699	70.628	7.58325	97.6265	14.426	115.904	25.0531	70.5992	17.5738	69.6045	6.77709	90.4262	24.9653	96.9433	8.4249
Peptidyl-prolyl cis-trans isomerase] [protein_id=AKB53722.1	696	Peptidyl-prolyl cis-trans isomerase	AKB53722.1	24.4613	5.63316	38.5643	19.095	44.7197	8.8874	54.3517	9.03667	29.9257	10.8289	51.12	8.02498	40.719	7.51622	39.775	5.61214
OB-fold nucleic acid binding domain protein] [protein_id=AKB53723.1	697	OB-fold nucleic acid binding domain protein	AKB53723.1	12.8805	1.87415	19.8894	7.38647	22.6693	5.6709	25.6688	21.095	18.6895	0.693115	12.9563	7.0763	25.5559	18.4703	22.8155	15.4847
Mannose-1-phosphate guanylyltransferase] [protein_id=AKB53724.1	698	Mannose-1-phosphate guanylyltransferase	AKB53724.1	157.419	15.6518	166.969	20.4605	159.636	2.46669	183.841	43.4524	143.141	6.25	164.931	14.6559	154.445	21.6223	152.101	6.6713
phytol kinase] [protein_id=AKB53725.1	699	phytol kinase	AKB53725.1	4.29022	2.3627	3.90453	4.25318	4.33502	1.98698	3.49512	2.14427	4.41446	3.40491	4.21099	3.95958	5.44842	3.0629	5.67804	3.57425
hypothetical protein] [protein_id=AKB53726.1	700	hypothetical protein	AKB53726.1	57.9454	28.2648	51.9137	7.78977	35.8874	3.70951	46.3066	14.5126	38.0862	6.97452	48.2283	7.83948	34.43	7.62843	40.8882	8.46038
hypothetical protein] [protein_id=AKB53727.1	701	hypothetical protein	AKB53727.1	89.0893	12.9815	86.5435	20.6748	110.486	8.02982	102.522	15.946	121.415	15.7245	97.9721	4.66793	120.66	27.4366	106.003	19.4827
hypothetical protein] [protein_id=AKB53728.1	702	hypothetical protein	AKB53728.1	97.9502	19.3772	90.0569	5.83077	110.672	5.17876	90.1793	17.6327	126.173	11.6505	102.312	15.5206	130.575	13.1919	135.827	16.0778
hypothetical protein] [protein_id=AKB53729.1	703	hypothetical protein	AKB53729.1	96.0868	25.1943	118.798	16.1118	111.88	9.62636	141.554	29.1978	129.743	9.7256	103.763	10.3194	158.83	39.9863	164.329	18.4729
MoxR-like ATPase] [protein_id=AKB53730.1	704	MoxR-like ATPase	AKB53730.1	135.237	3.5751	128.762	21.7938	144.334	15.2556	111.602	16.0638	144.113	19.1265	133.01	8.39655	156.482	38.4602	178.185	20.5295
hypothetical protein] [protein_id=AKB53731.1	705	hypothetical protein	AKB53731.1	129.221	25.3569	113.592	47.6025	143.926	9.59688	149.171	22.0574	130.47	15.4028	138.313	9.63631	140.691	12.0955	152.647	16.0395
Prephenate dehydratase] [protein_id=AKB53732.1	706	Prephenate dehydratase	AKB53732.1	201.977	16.339	172.439	10.4835	176.153	28.242	191.939	16.6907	162.396	17.3752	177.548	17.2017	179.415	15.737	217.453	26.2393
Glycosyltransferase] [protein_id=AKB53733.1	707	Glycosyltransferase	AKB53733.1	41.1119	9.5525	35.443	9.22048	49.7288	4.03796	40.7132	8.09193	36.3026	4.09192	48.3173	9.3515	43.5874	2.48639	56.5531	9.29207
hypothetical protein] [protein_id=AKB53734.1	708	hypothetical protein	AKB53734.1	119.741	44.3017	60.8664	9.65547	33.9444	7.54026	54.8962	8.9785	65.2101	3.0194	51.8807	1.83672	71.7311	38.6964	59.2734	14.951
Cell surface protein] [protein_id=AKB53735.1	709	Cell surface protein	AKB53735.1	20.2273	11.176	17.2173	2.84454	16.2583	4.76367	21.0338	5.08168	13.8096	6.22699	9.98802	5.00846	12.1706	6.17635	16.2402	2.35777
hypothetical protein] [protein_id=AKB53736.1	710	hypothetical protein	AKB53736.1	67.9568	14.6236	64.8584	24.4054	54.3367	9.89613	52.9419	10.7456	60.1918	17.0874	63.9724	13.9465	47.5169	12.957	60.2942	1.80993
DNA polymerase, beta-like region] [protein_id=AKB53737.1	711	DNA polymerase, beta-like region	AKB53737.1	71.1986	12.8456	60.6709	23.7475	57.4949	18.1732	62.7862	18.6532	63.1428	5.45617	55.1301	19.919	71.4644	17.137	68.4207	23.2607
putative amidohydrolase] [protein_id=AKB53738.1	712	putative amidohydrolase	AKB53738.1	76.3381	15.8583	112.702	25.7193	103.865	2.10827	107.891	12.52	95.0984	22.7324	121.582	6.39659	121.649	13.1901	98.9272	9.86245
Histone acetyltransferase HPA2] [protein_id=AKB53739.1	713	Histone acetyltransferase HPA2	AKB53739.1	19.6772	5.2056	22.5535	7.95162	14.2108	6.60799	27.1342	3.68054	21.444	1.43973	22.3261	1.59769	26.8942	9.157	24.2496	12.5042
hypothetical protein] [protein_id=AKB53740.1	714	hypothetical protein	AKB53740.1	100.145	12.8401	79.055	6.69051	116.213	18.4297	97.8323	21.4166	80.3957	19.6988	79.6253	14.9768	73.9093	28.5193	60.9636	12.6093
putative glycosyltransferase] [protein_id=AKB53741.1	715	putative glycosyltransferase	AKB53741.1	43.1364	5.71812	32.488	15.622	36.555	1.76705	29.1078	4.61822	37.8204	4.0343	31.2028	8.26311	33.6784	7.86212	44.7814	12.7877
hypothetical protein] [protein_id=AKB53742.1	716	hypothetical protein	AKB53742.1	114.331	19.6603	154.815	35.1403	120.488	19.8356	109.617	22.0935	111.369	7.00565	144.064	19.982	102.491	32.4116	124.296	24.532
hypothetical protein] [protein_id=AKB53743.1	717	hypothetical protein	AKB53743.1	152.014	3.60844	157.564	37.2434	106.812	7.00259	99.4639	17.1617	152.789	8.59954	113.528	10.2567	132.927	19.7827	141.361	18.5469
hypothetical protein] [protein_id=AKB53744.1	718	hypothetical protein	AKB53744.1	29.3216	8.91859	20.4393	4.77965	16.2439	2.11289	21.2865	8.05885	13.7563	6.35859	25.0869	4.90171	13.4424	6.15536	12.3512	3.853
CRISPR-associated protein, Cas2] [protein_id=AKB53745.1	719	CRISPR-associated protein, Cas2	AKB53745.1	0.824743	1.4285	2.3105	1.4813	3.84217	3.62213	2.05473	1.53938	5.84342	3.31694	1.64446	0.591323	3.79235	4.06356	2.82092	3.31399
CRISPR-associated protein Cas1] [protein_id=AKB53746.1	720	CRISPR-associated protein Cas1	AKB53746.1	15.5625	8.64081	16.6924	10.4176	37.6338	5.52629	21.2319	12.3697	18.1632	9.15986	23.9468	5.71205	24.7554	8.33429	28.164	5.62955
CRISPR-associated protein, Cse3 family] [protein_id=AKB53747.1	721	CRISPR-associated protein, Cse3 family	AKB53747.1	7.36152	5.43532	9.47036	2.27858	12.5117	3.22836	12.6044	1.37751	9.76769	2.20955	10.3492	0.665229	12.9735	2.95663	15.1157	1.32903
hypothetical protein] [protein_id=AKB53748.1	722	hypothetical protein	AKB53748.1	1.47181	1.39151	1.82313	1.17825	2.41941	0.994599	2.35943	3.55693	2.71185	1.79844	4.37155	4.08011	4.00921	0.937223	4.53285	1.46172
CRISPR-associated protein, Cas5e family] [protein_id=AKB53749.1	723	CRISPR-associated protein, Cas5e family	AKB53749.1	16.8339	3.72855	16.3703	3.85655	26.4149	8.37439	24.2727	2.59187	24.1619	8.91773	22.6526	2.22348	25.9376	8.00771	22.1231	11.3715
CRISPR-associated protein, Cse4 family] [protein_id=AKB53750.1	724	CRISPR-associated protein, Cse4 family	AKB53750.1	41.6187	21.7969	27.0492	8.87919	37.2818	2.81713	22.7247	0.977629	27.0399	5.34474	38.9819	9.1666	40.4068	4.145	38.5245	5.22692
CRISPR-associated protein, Cse1 family] [protein_id=AKB53751.1	725	CRISPR-associated protein, Cse1 family	AKB53751.1	8.60776	4.64227	9.07838	8.12614	6.8515	2.70885	4.96939	3.54387	6.63142	1.90203	11.9298	6.35191	8.20652	6.76222	7.18028	3.7846
CRISPR-associated helicase Cas3, protein] [protein_id=AKB53752.1	726	CRISPR-associated helicase Cas3, protein	AKB53752.1	27.1636	0.524371	14.3209	0.565985	24.6122	2.53245	16.8484	6.14732	25.5514	6.78848	14.8193	2.35846	17.839	5.99404	21.7282	8.60225
Transcriptional regulator] [protein_id=AKB53753.1	727	Transcriptional regulator	AKB53753.1	23.4602	5.43114	26.8829	7.26439	21.2704	8.79519	33.2743	3.25655	20.8056	3.75419	31.0925	7.17923	30.0509	8.34861	28.7744	4.55731
Glucoamylase] [protein_id=AKB53754.1	728	Glucoamylase	AKB53754.1	55.3841	13.1228	39.3145	6.99382	40.1313	0.64273	48.1442	8.59411	44.8819	11.4775	42.807	2.55863	43.3912	5.03877	46.0235	5.82732
cell surface protein] [protein_id=AKB53755.1	729	cell surface protein	AKB53755.1	4479.98	98.1349	4750.35	660.075	3460.48	430.483	4251.26	144.998	3967.68	77.1032	5574.4	468.467	5532.36	168.491	5825.09	341.584
Flavoprotein wrbA] [protein_id=AKB53756.1	730	Flavoprotein wrbA	AKB53756.1	156.543	5.81904	208.487	31.7558	213.433	10.9242	169.001	10.5639	160.366	7.29685	250.934	12.7159	189.096	49.2012	187.16	11.6846
dolichol-P-glucose synthetase, putative] [protein_id=AKB53757.1	731	dolichol-P-glucose synthetase, putative	AKB53757.1	130.589	20.6737	119.116	31.9749	97.8661	15.6535	103.145	2.4506	119.013	9.78035	120.51	5.4819	131.22	10.0151	126.032	17.3017
LPS biosynthesis RfbU related protein] [protein_id=AKB53758.1	732	LPS biosynthesis RfbU related protein	AKB53758.1	38.6636	3.80583	33.4247	6.46755	40.9951	12.7149	30.7295	8.5024	36.8538	12.7055	43.0738	3.42034	47.9539	1.49122	49.1887	1.73654
hypothetical protein] [protein_id=AKB53759.1	733	hypothetical protein	AKB53759.1	316.454	196.987	154.853	21.1027	417.688	19.4161	357.079	28.3597	221.807	35.1218	151.461	10.209	405.755	223.86	348.824	140.692
Glycosyltransferase] [protein_id=AKB53760.1	734	Glycosyltransferase	AKB53760.1	45.7229	3.75819	25.6149	8.01239	40.1517	6.23705	39.5983	7.36824	30.091	3.57386	30.8548	2.67523	29.2303	17.3007	43.8194	3.28742
hypothetical protein] [protein_id=AKB53761.1	735	hypothetical protein	AKB53761.1	190.026	47.6593	169.435	21.1126	137.031	12.5184	142.958	19.7186	145.951	14.6562	187.453	11.7818	161.078	29.7926	147.642	14.7384
hypothetical protein] [protein_id=AKB53762.1	736	hypothetical protein	AKB53762.1	23.9373	10.4123	14.0952	5.67535	17.4133	2.13658	22.1103	1.79141	19.743	3.27009	15.222	4.32636	16.6486	3.23996	14.8124	2.27279
UDP-glucose dehydrogenase] [protein_id=AKB53763.1	737	UDP-glucose dehydrogenase	AKB53763.1	150.438	13.5087	156.135	28.3368	77.7601	17.8442	91.5475	25.8577	114.141	36.5629	145.847	23.0692	116.206	22.7771	86.4425	21.6846
UDP-glucose 4-epimerase] [protein_id=AKB53764.1	738	UDP-glucose 4-epimerase	AKB53764.1	91.9393	9.7477	107.768	7.61589	56.5713	18.0655	49.0689	9.66525	61.1147	16.9187	108.968	15.274	73.9894	21.5992	59.6284	3.76538
UDP-N-acetylglucosamine 1-carboxyvinyltransferase] [protein_id=AKB53765.1	739	UDP-N-acetylglucosamine 1-carboxyvinyltransferase	AKB53765.1	59.8593	10.3971	67.1377	21.1662	49.8234	7.31663	51.5641	5.79384	35.5072	6.70053	71.4089	17.2192	48.6885	17.5997	51.1034	6.73613
UDP-N-acetylenolpyruvoylglucosamine reductase] [protein_id=AKB53766.1	740	UDP-N-acetylenolpyruvoylglucosamine reductase	AKB53766.1	32.3481	12.724	25.124	7.29306	25.1026	8.21497	23.7429	2.75868	19.6622	3.85985	31.973	2.59693	23.7312	8.54982	14.4825	3.3095
Serine acetyltransferase] [protein_id=AKB53767.1	741	Serine acetyltransferase	AKB53767.1	6.78582	2.94885	1.98596	1.95501	4.20011	0.530191	7.14282	3.04271	2.1438	2.25126	2.93457	2.53671	0.848108	0.798438	1.73959	2.09343
polysaccharide biosynthesis protein] [protein_id=AKB53768.1	742	polysaccharide biosynthesis protein	AKB53768.1	44.4736	15.4108	15.4587	9.05255	21.2868	4.96643	18.73	7.3362	12.7943	5.69195	26.574	3.58332	25.9784	4.77769	22.7707	4.96555
hypothetical protein] [protein_id=AKB53769.1	743	hypothetical protein	AKB53769.1	32.1803	6.97357	24.149	3.07559	19.9357	5.76706	21.5403	11.9967	20.8547	7.7407	24.8858	3.99966	19.1685	8.18097	23.844	5.42723
hypothetical protein] [protein_id=AKB53770.1	744	hypothetical protein	AKB53770.1	74.1606	44.5812	39.5072	24.4366	46.5955	7.78543	49.1891	8.30554	30.8411	11.8286	64.5945	2.52564	44.1107	19.4354	31.4719	8.70731
Glycosyl transferase, group 1 family protein] [protein_id=AKB53771.1	745	Glycosyl transferase, group 1 family protein	AKB53771.1	17.9238	6.52359	17.2184	7.30271	15.2831	2.23528	24.9357	8.23041	12.3223	0.982013	22.1856	7.17295	15.3536	12.7798	15.0412	8.80835
hypothetical protein] [protein_id=AKB53772.1	746	hypothetical protein	AKB53772.1	34.8259	6.57036	30.0365	12.7376	27.3099	6.2547	38.1869	2.63043	22.0225	8.91186	34.9604	9.65996	29.9613	4.55563	41.9371	9.72715
nodulation protein L] [protein_id=AKB53773.1	747	nodulation protein L	AKB53773.1	29.053	11.0292	22.911	10.3704	20.2971	5.75673	16.8048	10.0833	15.2096	0.410737	28.5067	7.37805	19.3728	12.2645	23.5168	2.1531
hypothetical protein] [protein_id=AKB53774.1	748	hypothetical protein	AKB53774.1	60.6467	12.445	49.865	18.6886	45.2609	9.3688	42.2579	17.2413	42.2635	5.81047	50.4058	11.608	48.1927	12.7478	55.317	7.84195
glycosyltransferase (family 2)] [protein_id=AKB53775.1	749	glycosyltransferase (family 2)	AKB53775.1	94.6003	9.93903	75.7669	11.9805	68.7654	7.06673	88.7142	12.2797	76.8954	4.19199	74.7504	17.1185	71.1177	24.8928	86.7426	6.38288
hypothetical protein] [protein_id=AKB53776.1	750	hypothetical protein	AKB53776.1	4947.69	695.583	4464.8	646.215	4614.75	115.552	4570.89	612.678	3421.53	247.198	4551.71	380.128	3928.08	387.695	4611.54	651.219
hypothetical protein] [protein_id=AKB53780.1	751	hypothetical protein	AKB53780.1	0	0	0	0	0.0632229	0.109505	0	0	0	0	0	0	0	0	0	0
hypothetical protein] [protein_id=AKB53796.1	752	hypothetical protein	AKB53796.1	4947.69	695.583	4464.8	646.215	4614.75	115.552	4570.89	612.678	3421.53	247.198	4552.04	380.041	3928.08	387.695	4611.54	651.219
glycosyltransferase (family 2)] [protein_id=AKB53800.1	753	glycosyltransferase (family 2)	AKB53800.1	17.0077	6.75238	18.3543	5.85822	13.5188	1.67421	20.9541	1.92834	20.2927	2.78341	16.5996	5.74996	14.6171	3.29721	22.1997	4.26032
hypothetical protein] [protein_id=AKB53801.1	754	hypothetical protein	AKB53801.1	10.1625	0.688525	11.423	7.87701	19.0093	3.9781	17.9851	2.3635	15.376	4.32372	14.5625	4.62167	11.5143	4.15509	17.7621	5.01539
CAAX amino terminal protease family protein] [protein_id=AKB53802.1	755	CAAX amino terminal protease family protein	AKB53802.1	5.1972	3.77573	0	0	4.04229	2.73627	3.40683	2.32288	0.806245	0.740777	2.24462	1.99974	2.96992	1.65923	2.94013	1.21345
hypothetical protein] [protein_id=AKB53803.1	756	hypothetical protein	AKB53803.1	66.8228	13.6807	80.8395	20.0937	55.5613	8.73944	57.7357	1.73936	49.8718	6.61869	80.4084	17.1865	52.0978	31.9624	39.824	14.5765
Indolepyruvate oxidoreductase subunit IorB] [protein_id=AKB53804.1	757	Indolepyruvate oxidoreductase subunit IorB	AKB53804.1	68.1093	13.2134	77.5647	36.4716	46.6851	15.095	41.8959	19.0434	78.6058	7.76625	52.6149	18.0307	64.7311	18.9584	62.625	11.0608
Indolepyruvate oxidoreductase subunit IorA] [protein_id=AKB53805.1	758	Indolepyruvate oxidoreductase subunit IorA	AKB53805.1	312.337	22.8497	388.908	80.9786	241.124	19.4195	247.119	40.4636	457.567	71.9665	288.73	19.1888	355.926	49.2963	391.599	19.0682
Nickel insertion protein] [protein_id=AKB53806.1	759	Nickel insertion protein	AKB53806.1	41.8625	6.3138	46.348	4.6323	42.824	5.53514	64.6767	9.03731	44.6377	6.93436	53.615	4.38437	46.2288	11.6861	50.4169	1.73508
Orotidine 5'-phosphate decarboxylase] [protein_id=AKB53807.1	760	Orotidine 5'-phosphate decarboxylase	AKB53807.1	188.509	27.7953	212.215	24.8099	243.92	21.072	224.116	19.6349	210.761	11.7892	221.074	3.9948	217.105	6.35836	238.733	24.0131
Deoxyhypusine synthase] [protein_id=AKB53808.1	761	Deoxyhypusine synthase	AKB53808.1	243.32	73.7566	264.995	15.8253	281.834	15.9268	237.842	28.8224	330.648	32.7118	256.778	29.5186	276.225	57.0725	333.211	10.7724
Methionine ABC transporter ATP-binding protein] [protein_id=AKB53809.1	762	Methionine ABC transporter ATP-binding protein	AKB53809.1	15.0074	0.584361	15.4285	8.29434	17.9126	4.48703	14.3727	5.37672	15.3823	2.48882	14.0139	5.12388	14.8283	2.90567	15.8299	5.96384
YbbM seven transmembrane helix protein] [protein_id=AKB53810.1	763	YbbM seven transmembrane helix protein	AKB53810.1	18.4201	2.63681	6.70479	3.36092	14.1784	4.97903	7.45593	4.32273	9.8076	4.1807	11.4665	2.07715	14.7575	6.9365	9.57763	3.67946
Thioredoxin] [protein_id=AKB53811.1	764	Thioredoxin	AKB53811.1	30.4485	20.2514	21.0592	5.67137	30.6334	2.98091	19.763	6.24309	20.3385	3.42632	21.4879	7.28506	15.3304	11.2357	14.5713	8.14701
hypothetical protein] [protein_id=AKB53812.1	765	hypothetical protein	AKB53812.1	626.305	74.5491	823.025	213.468	867.139	318.561	764.916	95.2308	614.29	333.74	900.341	148.53	552.22	273.425	432.021	160.737
hypothetical protein] [protein_id=AKB53813.1	766	hypothetical protein	AKB53813.1	93.926	9.36626	111.319	31.7092	84.5858	15.5695	89.4497	7.8026	85.5259	3.5262	75.4262	2.27213	67.9309	18.402	78.5874	6.25117
Archaeal S-adenosylmethionine synthetase] [protein_id=AKB53814.1	767	Archaeal S-adenosylmethionine synthetase	AKB53814.1	46.804	10.6941	51.6203	5.94331	61.8383	9.3563	72.3802	18.6148	55.723	11.1363	51.7763	4.44194	65.3003	14.6367	56.2844	12.8615
(S)-2,3-di-O-geranylgeranylglyceryl phosphate synthase] [protein_id=AKB53815.1	768	(S)-2,3-di-O-geranylgeranylglyceryl phosphate synthase	AKB53815.1	51.5392	1.10453	59.6279	8.69769	66.1305	5.43069	60.2243	12.3184	57.0645	11.4245	52.9059	3.18784	55.6438	17.1465	64.3955	12.1705
hypothetical protein] [protein_id=AKB53816.1	769	hypothetical protein	AKB53816.1	1226.72	55.9538	1773.61	380.234	2026.43	161.719	2065.41	227.123	1180.52	341.276	1928.67	214.942	1495.86	296.773	1687.82	439.135
Quinolinate synthetase] [protein_id=AKB53817.1	770	Quinolinate synthetase	AKB53817.1	76.7301	10.0421	75.571	10.5336	76.6753	17.9637	62.7172	11.2735	90.7078	5.80481	94.4206	13.2515	83.8043	20.2933	78.1371	13.6405
L-Aspartate dehydrogenase] [protein_id=AKB53818.1	771	L-Aspartate dehydrogenase	AKB53818.1	149.971	37.5028	151.447	8.46899	119.383	9.47917	117.083	20.9192	180.258	19.233	152.816	10.5145	168.132	28.2368	169.332	25.7681
Quinolinate phosphoribosyltransferase (decarboxylating)] [protein_id=AKB53819.1	772	Quinolinate phosphoribosyltransferase (decarboxylating)	AKB53819.1	19.7083	2.49334	26.4943	3.31153	12.6317	0.768242	21.454	16.8791	28.0663	0.543734	25.5894	5.45648	26.7124	4.54028	22.626	10.0344
Iron(III) dicitrate-binding protein] [protein_id=AKB53820.1	773	Iron(III) dicitrate-binding protein	AKB53820.1	235.148	72.0176	286.781	116.646	122.256	19.9873	134.155	37.6045	396.381	136.499	156.264	13.8401	212.17	39.2081	215.986	7.75508
Iron(III) dicitrate-binding protein] [protein_id=AKB53821.1	774	Iron(III) dicitrate-binding protein	AKB53821.1	227.584	67.9383	272.618	108.053	118.132	20.8688	129.511	35.5946	384.412	134.834	151.599	11.0136	203.623	39.0246	208.04	10.9053
Iron(III) dicitrate-binding protein] [protein_id=AKB53822.1	775	Iron(III) dicitrate-binding protein	AKB53822.1	461.452	102.259	476.847	130.004	290.273	42.3952	347.602	16.4074	550.271	73.5605	346.357	25.7208	380.106	54.9405	305.08	27.5905
Iron(III) dicitrate transport system permease protein] [protein_id=AKB53823.1	776	Iron(III) dicitrate transport system permease protein	AKB53823.1	306.184	20.9603	356.796	74.799	224.034	28.843	229.784	10.3755	313.023	120.749	303.547	21.5054	244.97	65.8233	205.4	25.0206
Iron(III) dicitrate transport ATP-binding protein] [protein_id=AKB53824.1	777	Iron(III) dicitrate transport ATP-binding protein	AKB53824.1	112.689	27.6447	144.72	37.5322	81.6097	5.80909	77.5589	6.32715	103.988	2.95521	112.635	8.40977	71.6939	38.9922	63.9276	10.1395
Methyltransferase] [protein_id=AKB53825.1	778	Methyltransferase	AKB53825.1	160.042	42.3946	225.993	57.4311	280.158	21.2924	274.894	45.3391	182.888	16.7954	241.753	43.8618	188.805	30.8133	221.309	43.9283
SSU ribosomal protein S13e (S15p)] [protein_id=AKB53826.1	779	SSU ribosomal protein S13e (S15p)	AKB53826.1	361.988	20.9782	483.368	27.5819	567.153	13.2331	567.898	39.8683	534.915	56.9712	478.238	25.6422	457.383	24.8746	576.894	97.0105
hypothetical protein] [protein_id=AKB53827.1	780	hypothetical protein	AKB53827.1	9.1268	4.39091	8.33396	4.69476	7.09394	4.76944	7.705	5.22311	6.95515	2.13682	9.53158	3.62547	6.77039	3.58095	8.68309	3.64326
hypothetical protein] [protein_id=AKB53828.1	781	hypothetical protein	AKB53828.1	7.70468	4.57457	10.157	7.33182	9.19426	2.74519	12.7122	6.0406	12.6229	6.86229	6.2066	3.28329	6.08779	1.95862	9.90382	5.44307
hypothetical protein] [protein_id=AKB53829.1	782	hypothetical protein	AKB53829.1	2.37633	2.81113	6.01991	3.59656	7.40709	4.68611	6.53689	4.15038	3.62027	3.8422	3.07912	3.79524	4.44425	2.76482	2.18768	1.64959
hypothetical protein] [protein_id=AKB53830.1	783	hypothetical protein	AKB53830.1	1.61347	2.79461	0.423297	0.501467	0.912505	0.0311813	1.25539	2.1744	3.15304	1.48472	0.417274	0.491499	0.65441	0.567184	1.89977	1.19021
Mobile element protein] [protein_id=AKB53831.1	784	Mobile element protein	AKB53831.1	96.801	2.58907	94.9305	24.3851	141.809	16.3977	133.334	18.7933	118.438	19.9642	91.2258	19.8802	110.712	31.0437	161.536	33.6116
Mobile element protein] [protein_id=AKB53832.1	785	Mobile element protein	AKB53832.1	48.068	15.2186	39.3153	5.58838	41.2067	11.868	23.0173	2.43651	43.197	9.07189	34.1582	10.2817	34.7553	7.93807	43.0126	8.5944
Rhodanese-like domain protein] [protein_id=AKB53833.1	786	Rhodanese-like domain protein	AKB53833.1	86.5687	20.7805	95.8181	15.0927	53.796	6.01201	68.2381	2.98117	91.482	4.96365	81.3611	7.85529	55.8238	24.9744	36.3879	13.3413
hypothetical protein] [protein_id=AKB53834.1	787	hypothetical protein	AKB53834.1	1.0577	1.19139	2.92991	2.58357	2.0799	1.02927	1.77179	2.31705	1.94222	0.566812	0.32196	0.557651	0.704565	1.22034	1.81782	2.66378
putative membrane protein] [protein_id=AKB53835.1	788	putative membrane protein	AKB53835.1	15.0015	4.62054	6.80122	2.87661	10.9685	4.50648	7.02906	0.979532	6.61163	4.34522	7.70516	3.32715	6.43818	2.96743	5.77063	1.59576
hypothetical protein] [protein_id=AKB53836.1	789	hypothetical protein	AKB53836.1	6.43918	6.68657	5.53347	2.45774	14.3596	2.64852	5.79543	2.75132	6.7412	3.03391	9.32182	5.87722	10.0694	1.84346	11.4423	2.95573
Histidyl-tRNA synthetase] [protein_id=AKB53837.1	790	Histidyl-tRNA synthetase	AKB53837.1	161.052	13.2299	153.037	2.39553	144.411	13.3845	167.032	8.85229	178.466	11.1453	160.189	12.441	174.376	10.4796	189.649	6.21552
L-threonine 3-O-phosphate decarboxylase] [protein_id=AKB53838.1	791	L-threonine 3-O-phosphate decarboxylase	AKB53838.1	203.294	13.0755	248.028	44.0391	177.125	21.2051	149.01	27.4931	255.092	69.5418	313.972	51.6565	240.783	112.179	186.728	44.6032
Adenosylcobinamide-phosphate synthase] [protein_id=AKB53839.1	792	Adenosylcobinamide-phosphate synthase	AKB53839.1	56.6976	18.7997	59.3949	9.99912	49.7646	3.45556	50.9674	20.0117	61.2627	10.5362	71.6954	6.82218	53.7941	14.7519	52.2129	10.4054
putative alpha-ribazole-5'-phosphate phosphatase CobZ] [protein_id=AKB53840.1	793	putative alpha-ribazole-5'-phosphate phosphatase CobZ	AKB53840.1	93.3171	27.952	89.0834	2.40087	88.7932	16.2145	93.7539	14.4841	94.3302	13.4425	108.401	20.0625	96.3685	28.0217	81.313	17.6741
Cobalamin synthase] [protein_id=AKB53841.1	794	Cobalamin synthase	AKB53841.1	145.745	13.7972	174.74	32.9424	169.827	16.1231	178.239	26.9868	134.705	39.295	206.586	4.46441	177.377	27.459	160.004	15.7336
putative adenosylcobinamide-phosphate guanylyltransferase CobY] [protein_id=AKB53842.1	795	putative adenosylcobinamide-phosphate guanylyltransferase CobY	AKB53842.1	75.5356	7.78055	82.2478	3.58032	76.2761	6.56214	72.377	27.1929	77.8925	9.31409	73.7425	5.97293	88.4892	18.5782	75.3515	19.4998
Iron-sulfur cluster assembly ATPase protein SufC] [protein_id=AKB53843.1	796	Iron-sulfur cluster assembly ATPase protein SufC	AKB53843.1	237.373	28.3417	281.683	34.9022	279.602	28.5234	291.017	29.2448	303.874	12.8417	339.343	35.8367	316.507	54.405	284.457	14.1239
Iron-sulfur cluster assembly protein SufB] [protein_id=AKB53844.1	797	Iron-sulfur cluster assembly protein SufB	AKB53844.1	307.612	67.1617	273.563	10.6805	248.168	20.8581	253.999	10.6838	303.466	38.363	297.526	36.6121	301.34	30.6131	252.728	20.2987
hypothetical protein] [protein_id=AKB53845.1	798	hypothetical protein	AKB53845.1	19.3575	6.70326	15.49	6.74807	17.5771	6.55674	19.5536	7.76152	19.2547	5.83271	18.5774	6.33332	23.058	12.7114	28.1561	7.84518
archaeosine tRNA-ribosyltransferase type 2 short] [protein_id=AKB53846.1	799	archaeosine tRNA-ribosyltransferase type 2 short	AKB53846.1	70.0565	1.02891	61.9595	25.3969	59.7157	17.7179	50.3631	13.1971	51.1256	6.52313	73.3261	7.02035	57.8108	10.673	48.837	10.9179
Aspartate aminotransferase] [protein_id=AKB53847.1	800	Aspartate aminotransferase	AKB53847.1	359.671	75.8449	375.284	35.9994	362.619	17.6639	359.244	27.9812	455.419	50.5957	325.203	16.4993	410.839	109.402	409.178	53.9863
Leucine responsive regulatory protein] [protein_id=AKB53848.1	801	Leucine responsive regulatory protein	AKB53848.1	474.798	72.1608	528.42	58.3847	456.116	16.9833	416.283	24.8413	549.55	29.7347	437.022	25.1436	520.942	98.761	533.793	5.12209
SSU ribosomal protein S8e] [protein_id=AKB53849.1	802	SSU ribosomal protein S8e	AKB53849.1	313.635	93.8559	256.403	90.5393	226.406	56.8882	217.687	25.6427	378.751	93.9382	209.457	49.8222	314.238	70.7136	303.585	99.6546
hypothetical protein] [protein_id=AKB53850.1	803	hypothetical protein	AKB53850.1	14.0596	10.4358	16.6029	10.8851	4.3181	2.62488	7.24323	3.94041	7.79641	5.09347	8.40741	5.41608	4.66614	0.948259	5.3779	3.1119
hypothetical protein] [protein_id=AKB53851.1	804	hypothetical protein	AKB53851.1	388.093	76.8689	431.539	65.9024	319.986	77.8147	321.051	17.779	405.698	20.8832	394.881	33.0312	434.686	44.422	334.682	80.1489
Iron-sulfur flavoprotein] [protein_id=AKB53852.1	805	Iron-sulfur flavoprotein	AKB53852.1	7.33811	3.99791	8.00674	1.88335	10.4293	4.49206	10.4638	4.55315	14.6155	4.30915	15.3118	5.22463	12.506	8.44467	6.81895	4.23212
Endoribonuclease Nob1] [protein_id=AKB53853.1	806	Endoribonuclease Nob1	AKB53853.1	89.8283	21.6861	77.7861	29.4092	68.3618	19.6996	70.492	16.1157	83.3617	18.2488	99.2968	5.29423	86.4001	14.025	84.0658	12.1633
Orotate phosphoribosyltransferase related protein] [protein_id=AKB53854.1	807	Orotate phosphoribosyltransferase related protein	AKB53854.1	400.275	65.4656	406.363	37.6261	308.425	9.60761	318.853	29.8915	377.93	55.2893	377.806	16.3721	363.955	42.8448	320.67	4.722
hypothetical protein] [protein_id=AKB53855.1	808	hypothetical protein	AKB53855.1	392.759	24.0891	455.378	15.5118	441.694	5.58682	496.337	27.6351	484.193	46.8499	440.88	24.4249	488.279	49.2202	428.422	24.0482
FtsH protease regulator HflK] [protein_id=AKB53856.1	809	FtsH protease regulator HflK	AKB53856.1	91.7794	10.8686	103.9	42.5638	76.8107	1.46134	77.2141	19.2585	111.781	11.3479	72.842	14.801	97.7437	20.1945	96.8407	16.7057
signal peptide peptidase SppA, 36K type] [protein_id=AKB53857.1	810	signal peptide peptidase SppA, 36K type	AKB53857.1	112.231	9.94033	126.189	6.57629	106.809	11.8124	109.111	19.0473	116.683	14.1173	114.656	5.90626	106.098	23.9894	113.309	12.4758
Hydrogenase expression/formation protein] [protein_id=AKB53858.1	811	Hydrogenase expression/formation protein	AKB53858.1	244.456	59.5051	331.168	22.6413	352.883	15.29	366.901	53.0156	329.305	37.9133	333.011	14.4017	370.371	68.4041	326.696	11.0302
Imidazole glycerol phosphate synthase amidotransferase subunit] [protein_id=AKB53859.1	812	Imidazole glycerol phosphate synthase amidotransferase subunit	AKB53859.1	430.955	111.855	426.823	78.1575	504.941	53.3734	449.199	56.3774	391.815	16.2786	472.144	31.7838	471.66	46.7824	528.379	67.6532
hypothetical protein] [protein_id=AKB53860.1	813	hypothetical protein	AKB53860.1	1.27421	1.6449	3.35344	3.42186	1.93453	0.694998	5.16056	1.97294	2.02325	1.62334	4.92108	1.74825	3.98164	2.86252	3.05559	1.9613
hypothetical protein] [protein_id=AKB53861.1	814	hypothetical protein	AKB53861.1	3.44309	2.77449	3.31934	1.18618	0.956811	0.798408	2.69578	1.47059	1.16202	0.688333	1.36626	2.36644	2.07858	2.11457	2.28877	1.63454
hypothetical protein] [protein_id=AKB53862.1	815	hypothetical protein	AKB53862.1	77.6016	8.42011	56.5988	14.4044	58.0583	7.31456	67.1677	7.76616	76.7281	19.7955	56.3171	9.29102	75.258	13.1809	85.0471	12.7426
Transcriptional regulator, PadR family] [protein_id=AKB53863.1	816	Transcriptional regulator, PadR family	AKB53863.1	8.58537	0.971599	12.6299	4.37371	9.25844	5.07324	11.1422	1.77034	14.97	2.76978	8.31441	1.16466	13.6549	8.39414	14.7783	4.38256
hypothetical protein] [protein_id=AKB53864.1	817	hypothetical protein	AKB53864.1	4.21189	2.45431	6.76892	2.54583	3.86109	2.8658	1.64839	0.980619	3.59274	1.85576	3.49867	3.59395	3.1937	1.62327	3.41322	2.01278
Acetyltransferase (GNAT) family protein] [protein_id=AKB53865.1	818	Acetyltransferase (GNAT) family protein	AKB53865.1	16.369	6.10593	18.9446	4.76502	7.68137	1.28848	11.0853	6.98038	9.75403	4.56632	17.4474	5.88348	14.6334	8.66203	14.1089	5.75152
hypothetical protein] [protein_id=AKB53866.1	819	hypothetical protein	AKB53866.1	192.388	18.8027	221.293	30.3492	194.823	13.619	172.514	35.7276	206.127	15.5408	182.739	8.66884	220.412	36.0105	225.576	26.9326
hypothetical protein] [protein_id=AKB53867.1	820	hypothetical protein	AKB53867.1	10.1156	2.66119	15.7897	9.70707	12.0836	5.1709	19.926	3.19497	14.0264	9.57546	9.17588	1.66842	9.80551	3.67771	11.545	5.26699
Cobalt-zinc-cadmium resistance protein] [protein_id=AKB53868.1	821	Cobalt-zinc-cadmium resistance protein	AKB53868.1	22.7372	15.9176	24.4397	8.02033	32.2339	9.42247	21.6007	15.6629	27.5501	4.01824	25.5287	6.09135	20.169	2.7255	28.1108	8.69309
Nascent polypeptide-associated complex protein] [protein_id=AKB53869.1	822	Nascent polypeptide-associated complex protein	AKB53869.1	301.796	60.2747	299.287	35.4939	278.223	65.6528	245.178	22.3334	315.443	73.1973	295.477	41.3588	301.571	40.3072	292.735	14.4459
putative iron binding protein from the HesB_IscA_SufA family] [protein_id=AKB53870.1	823	putative iron binding protein from the HesB_IscA_SufA family	AKB53870.1	559.194	128.701	683.844	220.006	450.112	47.6796	665.742	126.26	705.449	47.8876	549.825	107.739	905.081	240.661	717.847	204.985
hypothetical protein] [protein_id=AKB53871.1	824	hypothetical protein	AKB53871.1	293.208	51.516	283.794	29.7559	301.483	50.3804	267.428	49.6399	316.325	66.4922	225.461	36.645	377.498	166.082	417.636	67.2789
Putative glycogen debranching enzyme, archaeal type, TIGR01561] [protein_id=AKB53872.1	825	Putative glycogen debranching enzyme, archaeal type, TIGR01561	AKB53872.1	108.32	35.8629	108.871	21.9502	95.6603	10.6639	100.215	7.44033	83.5438	18.4122	99.6869	14.1849	77.8061	33.1209	74.0629	13.951
Phosphoribosyl-AMP cyclohydrolase] [protein_id=AKB53873.1	826	Phosphoribosyl-AMP cyclohydrolase	AKB53873.1	15.3393	8.55207	10.9021	4.53033	14.4736	0.281686	14.023	3.0561	13.0551	2.46974	14.6633	3.54539	21.8897	10.9072	15.0636	7.23891
hypothetical protein] [protein_id=AKB53874.1	827	hypothetical protein	AKB53874.1	8.50458	1.99155	8.52612	3.80333	13.367	3.18108	8.37892	6.08422	10.3905	5.97974	12.9573	0.531339	8.11936	3.87754	7.56077	2.30977
ThiJ/PfpI family protein] [protein_id=AKB53875.1	828	ThiJ/PfpI family protein	AKB53875.1	1.07169	0.929055	1.49772	1.25685	5.83793	4.21388	6.30937	4.6677	5.2724	0.980791	2.12239	1.64851	3.75724	2.30361	1.64222	1.36187
hypothetical protein] [protein_id=AKB53876.1	829	hypothetical protein	AKB53876.1	10.854	1.53095	9.79758	1.91056	17.6646	3.64125	14.0374	6.44509	17.9335	4.14177	10.9809	3.31281	17.063	5.69282	21.2354	1.81169
hypothetical protein] [protein_id=AKB53877.1	830	hypothetical protein	AKB53877.1	38.6761	5.40131	35.513	9.35092	40.6471	9.96971	31.9658	8.49868	51.1929	7.87168	27.1162	7.92779	40.6764	17.8304	48.8753	14.8374
hypothetical protein] [protein_id=AKB53878.1	831	hypothetical protein	AKB53878.1	700.736	55.6725	765.606	314.044	360.804	14.4364	488.578	75.4188	680.435	103.458	499.324	68.7113	657.996	173.481	610.65	82.4759
Protease] [protein_id=AKB53879.1	832	Protease	AKB53879.1	112.935	6.34563	124.148	29.7613	120.925	2.70515	125.103	15.0515	135.061	13.9409	114.468	20.6234	137.593	18.8644	147.875	9.64699
Multi antimicrobial extrusion protein (Na(+)/drug antiporter), MATE family of MDR efflux pumps] [protein_id=AKB53880.1	833	Multi antimicrobial extrusion protein (Na(+)/drug antiporter), MATE family of MDR efflux pumps	AKB53880.1	0.274914	0.476166	0.325416	0.563637	1.52582	0.547023	0	0	1.02909	0.928674	0	0	2.09614	2.80626	1.39423	1.62476
Multi antimicrobial extrusion protein (Na(+)/drug antiporter), MATE family of MDR efflux pumps] [protein_id=AKB53881.1	834	Multi antimicrobial extrusion protein (Na(+)/drug antiporter), MATE family of MDR efflux pumps	AKB53881.1	8.42168	3.54335	9.01593	0.670612	10.3512	3.51923	4.85463	3.26644	9.50823	4.64608	7.00194	1.38382	10.3032	4.20859	10.0374	4.30833
DNA-directed RNA polymerase subunit H] [protein_id=AKB53882.1	835	DNA-directed RNA polymerase subunit H	AKB53882.1	602.972	267.977	644.611	123.778	930.093	197.196	1095.86	42.2463	584.095	30.3255	780.485	5.26769	740.92	58.1422	725.247	46.9347
DNA-directed RNA polymerase subunit B''] [protein_id=AKB53883.1	836	DNA-directed RNA polymerase subunit B''	AKB53883.1	1316.17	151	1629.94	254.711	2005.23	57.1379	1845.32	42.6541	1447.55	103.399	1786.01	141.512	1572.57	242.866	1685.58	67.3808
DNA-directed RNA polymerase subunit B'] [protein_id=AKB53884.1	837	DNA-directed RNA polymerase subunit B'	AKB53884.1	1015.96	282.386	1027.29	82.6469	1134.35	93.8168	1179.37	143.399	1267.41	62.2302	1020.96	80.8754	1320.39	219.273	1134.54	198.252
DNA-directed RNA polymerase subunit A'] [protein_id=AKB53885.1	838	DNA-directed RNA polymerase subunit A'	AKB53885.1	1387.06	215.118	1748.95	173.763	1528.91	167.211	1645.63	76.3003	1648.15	182.352	1932.98	63.1622	1794.46	196.981	1515.87	99.2805
DNA-directed RNA polymerase subunit A''] [protein_id=AKB53886.1	839	DNA-directed RNA polymerase subunit A''	AKB53886.1	430.143	61.7476	523.875	56.3371	503.09	61.5651	510.842	56.436	567.577	15.5847	567.525	90.0888	635	24.3272	541.565	97.7995
LSU ribosomal protein L30e] [protein_id=AKB53887.1	840	LSU ribosomal protein L30e	AKB53887.1	343.64	59.7593	374.467	19.8292	347.885	42.7042	338.948	22.9087	436.901	36.9198	360.48	1.94723	427.741	59.8007	442.718	38.1933
transcription elongation factor NusA-like protein] [protein_id=AKB53888.1	841	transcription elongation factor NusA-like protein	AKB53888.1	357.034	79.62	350.266	58.8498	374.018	82.0012	326.321	84.1594	411.267	15.9403	368.489	89.4691	464.468	94.1042	470.903	44.7984
SSU ribosomal protein S23e (S12p)] [protein_id=AKB53889.1	842	SSU ribosomal protein S23e (S12p)	AKB53889.1	542.857	78.6598	424.68	125.769	325.578	98.4944	427.964	74.8266	615.235	78.3358	387.414	94.223	602.377	135.214	466.566	168.446
SSU ribosomal protein S5e (S7p)] [protein_id=AKB53890.1	843	SSU ribosomal protein S5e (S7p)	AKB53890.1	616.429	157.951	626.35	34.6359	633.901	20.8766	732.063	141.673	895.389	46.0251	666.213	73.5011	986.347	239.953	795.024	215.099
Translation elongation factor 2] [protein_id=AKB53891.1	844	Translation elongation factor 2	AKB53891.1	2757.44	180.969	3263.25	275.044	2511.34	310.06	2464.72	112.293	3551.84	220.394	3305.01	296.305	3706.47	170.717	3438.88	528.077
Translation elongation factor 1 alpha subunit] [protein_id=AKB53892.1	845	Translation elongation factor 1 alpha subunit	AKB53892.1	3703.66	106.859	3501.96	773.977	2465.24	425.328	2635.55	184.838	3853.75	57.7482	3355.25	654.619	3882.89	30.5072	3204.48	758.309
SSU ribosomal protein S20e (S10p)] [protein_id=AKB53893.1	846	SSU ribosomal protein S20e (S10p)	AKB53893.1	214.381	67.2395	204.658	28.6641	167.642	24.9558	126.794	1.92676	247.767	35.0222	210.017	36.1375	194.199	35.4989	200.897	28.3725
hypothetical protein] [protein_id=AKB53894.1	847	hypothetical protein	AKB53894.1	0	0	0.585541	1.01419	0.252892	0.438021	0.516403	0.47073	1.54074	1.63556	1.22946	1.06834	0.863149	0.80199	0.876452	0.820083
hypothetical protein] [protein_id=AKB53895.1	848	hypothetical protein	AKB53895.1	6.1636	2.82554	5.07898	4.13784	6.36016	3.72485	2.38614	2.22124	5.2724	0.980791	1.81273	1.4727	1.51756	0.527917	3.54677	1.44504
Fosmidomycin resistance protein] [protein_id=AKB53896.1	849	Fosmidomycin resistance protein	AKB53896.1	1.33015	1.73975	0.19518	0.338062	0.299193	0.518217	0.922751	0.921518	1.52379	1.86916	1.7936	2.61595	1.59842	2.76855	0.270863	0.469148
bifunctional 3-demethylubiquinone-9 3-methyltransferase/ 2-octaprenyl-6-hydroxy phenol methylase] [protein_id=AKB53897.1	850	bifunctional 3-demethylubiquinone-9 3-methyltransferase/ 2-octaprenyl-6-hydroxy phenol methylase	AKB53897.1	363.269	33.9396	314.486	67.0785	167.158	14.1079	191.807	6.80713	375.352	10.8541	279.628	33.8079	306.318	6.42068	200.933	99.3914
Oligopeptide ABC transporter, periplasmic oligopeptide-binding protein OppA] [protein_id=AKB53898.1	851	Oligopeptide ABC transporter, periplasmic oligopeptide-binding protein OppA	AKB53898.1	192.802	52.2864	225.205	84.5287	146.519	14.5284	171.897	8.31026	277.079	11.5629	179.657	34.5576	227.948	33.8181	193.213	45.8959
Oligopeptide ABC transporter, periplasmic oligopeptide-binding protein OppA] [protein_id=AKB53899.1	852	Oligopeptide ABC transporter, periplasmic oligopeptide-binding protein OppA	AKB53899.1	123.092	6.52948	177.054	26.8508	126.475	9.86803	153.008	17.3512	159.417	51.438	169.806	9.10973	143.247	32.6149	152.577	21.1847
ubiquinone/menaquinone biosynthesis methyltransferase] [protein_id=AKB53900.1	853	ubiquinone/menaquinone biosynthesis methyltransferase	AKB53900.1	28.3856	9.05041	26.0391	7.39959	18.3093	5.16318	18.8715	3.32343	33.9843	6.46918	28.0607	6.44005	17.426	6.39492	17.0958	6.46955
Dipeptide transport system permease protein DppB] [protein_id=AKB53901.1	854	Dipeptide transport system permease protein DppB	AKB53901.1	40.7856	2.60376	36.0632	8.43577	26.6289	3.05231	35.685	17.9782	32.3762	24.2081	35.6761	6.55738	36.0071	5.10746	24.3863	4.98807
Oligopeptide transport system permease protein OppC] [protein_id=AKB53902.1	855	Oligopeptide transport system permease protein OppC	AKB53902.1	14.4017	4.44618	20.3412	4.53031	19.3861	3.09976	28.7257	12.2832	11.6732	4.0957	21.4118	4.72486	25.8443	4.3409	16.1066	5.05526
Oligopeptide transport system permease protein OppB] [protein_id=AKB53903.1	856	Oligopeptide transport system permease protein OppB	AKB53903.1	14.8049	1.46932	26.7514	20.8236	23.0795	9.47309	27.1101	7.51149	26.2647	3.54431	20.9822	5.55499	21.106	5.31052	16.6749	2.97192
Oligopeptide transport ATP-binding protein OppF] [protein_id=AKB53904.1	857	Oligopeptide transport ATP-binding protein OppF	AKB53904.1	30.8929	14.9247	26.6918	9.29522	33.5974	8.25177	46.8401	5.29513	34.2013	11.0583	27.0734	1.66366	38.4367	12.6836	35.0942	2.66528
Protein-disulfide reductase] [protein_id=AKB53905.1	858	Protein-disulfide reductase	AKB53905.1	129.244	54.8527	160.173	62.8633	228.052	47.3208	238.561	17.4607	126.206	27.8568	186.845	34.8952	132.092	35.2678	145.075	40.0377
Transcriptional regulator, TrmB family] [protein_id=AKB53906.1	859	Transcriptional regulator, TrmB family	AKB53906.1	16.7769	11.202	18.8098	8.06514	31.4279	1.69794	26.574	9.09279	21.1694	4.41653	18.9865	8.39153	11.7964	5.15258	17.5965	9.27326
iron-sulfur cluster-binding protein] [protein_id=AKB53907.1	860	iron-sulfur cluster-binding protein	AKB53907.1	5.67464	4.58415	5.56612	3.3782	7.12282	3.5279	9.10085	3.10076	6.06646	1.4473	4.21786	3.06709	5.29236	3.24675	8.58622	6.67933
hypothetical protein] [protein_id=AKB53908.1	861	hypothetical protein	AKB53908.1	78.5614	14.8739	54.7446	1.62749	55.1914	4.7477	79.3561	9.58274	51.8984	1.18688	50.0615	10.3356	21.7536	14.5828	33.3705	19.4674
hypothetical protein] [protein_id=AKB53909.1	862	hypothetical protein	AKB53909.1	156.108	102.79	395.292	7.32678	330.862	161.304	363.792	14.3857	271.155	81.3116	350.88	57.2553	267.606	103.531	200.495	43.0766
hypothetical protein] [protein_id=AKB53910.1	863	hypothetical protein	AKB53910.1	74.6889	10.6739	163.004	39.3286	156.125	21.6482	164.934	39.9924	121.185	6.95851	140.016	21.684	123.577	43.0398	101.606	20.627
Dissimilatory sulfite reductase (desulfoviridin), alpha and beta subunits] [protein_id=AKB53911.1	864	Dissimilatory sulfite reductase (desulfoviridin), alpha and beta subunits	AKB53911.1	635.765	14.8359	1190.99	507.355	405.184	71.4788	633.12	39.7143	833.285	217.332	808.212	245.336	673.036	354.436	425.903	61.7511
Transcriptional regulator, HxlR family] [protein_id=AKB53912.1	865	Transcriptional regulator, HxlR family	AKB53912.1	34.7839	14.5005	47.1291	4.50265	33.1708	2.21816	37.2547	12.6858	28.5518	7.23471	40.551	2.60666	35.4135	5.57644	37.3947	6.61314
Acetyl-CoA synthetase (ADP-forming) alpha chain] [protein_id=AKB53913.1	866	Acetyl-CoA synthetase (ADP-forming) alpha chain	AKB53913.1	40.2581	2.27162	57.8412	20.7553	72.7521	14.2404	75.373	25.6797	46.7646	9.92503	42.7477	9.38827	50.5603	9.55993	53.2581	1.7308
Glutamate dehydrogenase 2] [protein_id=AKB53914.1	867	Glutamate dehydrogenase 2	AKB53914.1	23.2934	5.58464	13.1502	4.39735	20.426	9.0462	27.7923	6.12857	19.4699	3.34937	18.1343	8.66856	28.3685	7.84677	30.0521	6.44946
hypothetical protein] [protein_id=AKB53915.1	868	hypothetical protein	AKB53915.1	17.1997	9.39575	19.3347	3.577	16.9767	4.73093	16.7601	5.77187	19.5871	5.06436	13.9925	4.60203	15.0879	2.64813	13.6539	2.9553
hypothetical protein] [protein_id=AKB53916.1	869	hypothetical protein	AKB53916.1	180.415	39.0524	161.466	23.4708	110.477	15.9106	148.255	21.1794	180.119	19.0848	162.359	20.441	166.266	18.0927	136.333	25.1443
RNA-binding proteins (RRM domain)] [protein_id=AKB53917.1	870	RNA-binding proteins (RRM domain)	AKB53917.1	48.3909	6.33724	66.1011	14.9117	69.0178	3.58699	64.7319	5.90312	64.3475	8.84987	66.0958	8.84948	63.1783	11.3429	67.7166	7.46446
Kup system potassium uptake protein] [protein_id=AKB53918.1	871	Kup system potassium uptake protein	AKB53918.1	101.361	26.6062	77.7531	15.7061	96.7864	21.9447	61.8645	5.51394	82.1942	6.15279	105.886	29.2102	110.441	36.197	116.346	6.5233
hypothetical protein] [protein_id=AKB53919.1	872	hypothetical protein	AKB53919.1	0.824743	1.4285	0.0975902	0.169031	2.80921	2.14858	3.52059	1.29989	1.45971	0.434888	0.74151	1.04113	0.528424	0.915257	1.29418	1.22584
hypothetical protein] [protein_id=AKB53920.1	873	hypothetical protein	AKB53920.1	17.3372	7.49897	15.8522	4.11296	20.4251	2.96276	20.4088	8.97221	15.8127	2.69501	12.1519	2.06932	10.3515	1.80584	11.2523	2.81367
Dimethylamine permease] [protein_id=AKB53921.1	874	Dimethylamine permease	AKB53921.1	41.8786	5.57832	40.7519	8.97438	49.6526	18.6053	43.3022	15.2211	60.8358	8.00742	29.7298	4.47862	42.2572	15.177	53.8461	10.2929
hypothetical protein] [protein_id=AKB53922.1	875	hypothetical protein	AKB53922.1	4947.69	695.583	4464.8	646.215	4614.75	115.552	4570.89	612.678	3421.53	247.198	4552.04	380.041	3928.08	387.695	4611.54	651.219
Dimethylamine permease] [protein_id=AKB53923.1	876	Dimethylamine permease	AKB53923.1	24.1297	6.62334	59.9132	16.8538	102.547	13.3929	85.4015	25.4226	35.5101	9.90355	83.4689	7.51465	70.1657	21.4477	61.849	11.0833
Dimethylamine:corrinoid methyltransferase] [transl_except=(pos:1066..1068,aa:Pyl)] [protein_id=AKB53924.1	877	Dimethylamine:corrinoid methyltransferase	AKB53924.1	1519.19	565.122	4670.22	1806.6	6724.91	1178.73	6265.04	371.541	2660.4	306.801	7018.72	572.61	5005.36	2363.71	3475.92	386.04
Dimethylamine methyltransferase corrinoid protein] [protein_id=AKB53925.1	878	Dimethylamine methyltransferase corrinoid protein	AKB53925.1	463.462	102.424	830.583	126.726	1140.46	21.5543	1192.91	108.782	430.116	20.534	1245.8	240.162	744.776	520.387	576.274	127.048
hypothetical protein] [protein_id=AKB53926.1	879	hypothetical protein	AKB53926.1	47.1121	15.5025	31.3447	6.88622	35.9964	1.07753	43.5213	8.86188	31.6897	2.87898	25.8708	1.86996	26.5664	6.34424	25.1143	4.64943
anaerobic ribonucleoside-triphosphate reductase activating protein] [protein_id=AKB53927.1	880	anaerobic ribonucleoside-triphosphate reductase activating protein	AKB53927.1	21.8286	6.61301	34.1404	13.1461	49.5177	1.23457	36.2531	1.28082	20.334	1.45593	45.7379	2.82881	34.8305	11.0639	34.3981	2.04767
Quaternary ammonium compound-resistance protein SugE] [protein_id=AKB53928.1	881	Quaternary ammonium compound-resistance protein SugE	AKB53928.1	13.7287	9.34024	11.815	0.995412	8.52866	0.827302	21.935	6.07432	6.79316	6.08591	8.49498	3.19463	8.41835	2.646	11.1581	3.41378
hypothetical protein] [protein_id=AKB53929.1	882	hypothetical protein	AKB53929.1	5.9142	1.3449	7.94174	4.39386	11.2881	7.26032	8.39574	4.17165	8.71874	3.12367	7.8757	3.15286	5.62267	2.27775	4.05499	1.71564
Methyltransferase type 11] [protein_id=AKB53930.1	883	Methyltransferase type 11	AKB53930.1	2.94014	2.56231	2.24527	3.15895	6.57521	1.03102	4.85586	4.18452	1.17878	1.2951	4.46004	3.41208	5.85149	2.49117	7.1079	4.18454
hypothetical protein] [protein_id=AKB53931.1	884	hypothetical protein	AKB53931.1	39.0553	3.32554	36.9358	13.3902	42.0589	7.73584	26.3054	10.6817	43.4049	14.8245	40.1119	16.8578	48.9757	11.2336	38.4276	4.74305
UvsW helicase] [protein_id=AKB53932.1	885	UvsW helicase	AKB53932.1	65.9048	9.2206	45.4386	5.54145	65.1288	14.7603	65.3537	1.70096	73.3865	10.1573	53.0186	13.3014	80.3913	30.5492	65.4715	13.3972
hypothetical protein] [protein_id=AKB53933.1	886	hypothetical protein	AKB53933.1	0	0	0	0	0	0	0	0	0	0	0	0	0.176141	0.305086	0	0
hypothetical protein] [protein_id=AKB53934.1	887	hypothetical protein	AKB53934.1	6.70257	5.84736	2.53978	3.0088	5.31075	1.86048	8.63638	9.9117	1.08718	0.957456	1.54687	0.509589	1.83724	0.222831	3.31209	1.89844
5-methylcytosine-specific restriction enzyme A] [protein_id=AKB53935.1	888	5-methylcytosine-specific restriction enzyme A	AKB53935.1	9.77567	6.19995	9.98939	6.76323	8.89802	4.68983	11.4786	4.42922	10.5462	5.73211	13.4666	5.09974	7.01425	0.665794	10.1321	6.75123
hypothetical protein] [protein_id=AKB53936.1	889	hypothetical protein	AKB53936.1	8.51016	6.38605	8.62273	9.13157	13.5188	1.67421	11.7613	5.53066	5.67117	3.92524	12.7575	5.51095	7.81472	2.4058	15.7931	8.47134
ABC transporter, ATP-binding protein] [protein_id=AKB53937.1	890	ABC transporter, ATP-binding protein	AKB53937.1	5.39727	2.80274	5.7936	1.07637	3.88599	0.521595	4.92093	5.07476	6.81005	0.403139	3.16214	1.94872	4.20291	0.487259	9.50151	5.36437
ABC transporter, permease protein] [protein_id=AKB53938.1	891	ABC transporter, permease protein	AKB53938.1	7.88236	2.72492	6.80336	2.642	11.0621	3.64889	12.7956	4.15135	9.69124	2.29885	8.00252	3.89744	11.4109	1.32291	7.53685	2.18008
putative carboxyl-terminal-processing protease, deltaproteobacterial] [protein_id=AKB53939.1	892	putative carboxyl-terminal-processing protease, deltaproteobacterial	AKB53939.1	11.5962	10.2955	22.914	6.16518	29.4381	1.56814	30.0345	7.67838	21.9237	7.97099	16.8879	0.429098	22.7183	5.00987	36.8481	10.326
Sodium/glycine symporter GlyP] [protein_id=AKB53940.1	893	Sodium/glycine symporter GlyP	AKB53940.1	27.7477	11.9033	12.7903	3.47986	15.2114	6.26768	19.1062	0.585481	23.2535	0.631933	14.9	4.54644	13.6894	6.64299	13.0292	2.2925
hypothetical protein] [protein_id=AKB53941.1	894	hypothetical protein	AKB53941.1	0.921982	1.59692	0.618477	0.537891	0.0632229	0.109505	4.13123	3.76584	0.161868	0.280363	0.61473	0.534169	0.334726	0.579762	0.605589	0.533132
hypothetical protein] [protein_id=AKB53942.1	895	hypothetical protein	AKB53942.1	5.36683	2.13135	2.47338	2.93726	2.6703	1.78024	2.76578	4.01594	4.36237	1.76451	0.19518	0.338062	1.55016	1.37937	4.44982	3.21371
hypothetical protein] [protein_id=AKB53943.1	896	hypothetical protein	AKB53943.1	9.34577	3.31595	5.95578	3.07463	20.6103	0.964987	21.1923	5.69486	8.24539	2.6189	7.84104	1.81727	13.2098	6.80263	12.1267	7.10661
hypothetical protein] [protein_id=AKB53944.1	897	hypothetical protein	AKB53944.1	13.8934	7.24165	8.29742	5.13912	15.4489	4.52962	16.472	6.65488	7.52469	2.35556	8.88306	3.71672	9.81243	2.991	8.13871	3.04791
hypothetical protein] [protein_id=AKB53945.1	898	hypothetical protein	AKB53945.1	15.2484	5.06088	10.4148	4.40001	23.5359	5.02475	18.6803	5.05745	9.78614	3.06791	17.0821	5.31651	16.4543	3.36893	16.8798	6.18419
hypothetical protein] [protein_id=AKB53946.1	899	hypothetical protein	AKB53946.1	0.274914	0.476166	0	0	0.189669	0.328516	0.921516	1.59611	0	0	0.319684	0.553709	1.20039	1.33749	1.37241	1.68312
MuT/NUDIX protein] [protein_id=AKB53947.1	900	MuT/NUDIX protein	AKB53947.1	1.09966	1.90466	0.487951	0.845156	1.19278	1.033	0.615579	0.53311	1.12998	1.2227	4.66888	5.16287	4.4618	3.50105	1.37136	1.44521
cell surface protein] [protein_id=AKB53948.1	901	cell surface protein	AKB53948.1	228.199	24.956	270.64	102.276	176.254	41.7597	188.81	15.6457	383.75	57.898	173.471	11.5744	270.619	85.8368	310.351	31.2721
Chitin binding protein] [protein_id=AKB53949.1	902	Chitin binding protein	AKB53949.1	37.806	21.0676	31.017	14.6792	32.5734	7.41888	28.5105	18.3663	46.2612	7.93802	26.2101	14.3664	25.4431	9.78255	39.2822	11.4145
hypothetical protein] [protein_id=AKB53950.1	903	hypothetical protein	AKB53950.1	6885.76	2175.86	7633.24	2237.03	4738.33	241.397	6271.48	676.499	9456.43	1466.67	5222.46	37.7716	7188.26	1697.61	7883.88	1132.85
hypothetical protein] [protein_id=AKB53951.1	904	hypothetical protein	AKB53951.1	19.7692	3.39475	18.4863	1.62715	18.9431	3.03863	20.6675	2.38469	23.345	4.3906	20.2556	8.29378	18.3543	5.81755	20.789	4.67655
hypothetical protein] [protein_id=AKB53952.1	905	hypothetical protein	AKB53952.1	38.2719	6.23039	38.1137	4.28719	39.636	2.85494	52.1107	12.636	40.2953	0.926243	45.1255	4.88622	43.6281	6.36124	37.4383	3.46023
hypothetical protein] [protein_id=AKB53953.1	906	hypothetical protein	AKB53953.1	25.9601	7.42802	28.3786	10.2693	34.828	13.1238	27.8657	3.86187	18.0286	7.35399	26.4933	2.03722	25.1428	5.79439	29.0596	5.91267
Dimethylamine methyltransferase corrinoid protein] [protein_id=AKB53954.1	907	Dimethylamine methyltransferase corrinoid protein	AKB53954.1	688.85	118.769	1190.43	156.561	1662.16	17.4109	1753.09	126.928	638.328	12.1742	1766.98	348.923	1122.01	679.697	863.337	158.097
Dimethylamine:corrinoid methyltransferase] [transl_except=(pos:1066..1068,aa:Pyl)] [protein_id=AKB53955.1	908	Dimethylamine:corrinoid methyltransferase	AKB53955.1	1856.71	652.952	5462.91	1978.28	7837.68	1336.36	7351.8	431.507	3222.38	390.402	8208.77	706.392	5932.71	2737.38	4117.83	471.56
Dimethylamine permease] [protein_id=AKB53956.1	909	Dimethylamine permease	AKB53956.1	289.312	77.5635	914.818	504.382	1571.22	387.341	1709.43	94.9908	503.348	120.576	1685.21	193.384	1038.39	732.962	646.937	60.2193
Transcriptional regulator, ArsR family] [protein_id=AKB53957.1	910	Transcriptional regulator, ArsR family	AKB53957.1	241.829	66.8707	185.713	16.0836	189.261	28.8833	179.979	1.98414	204.339	21.097	167.521	10.1091	209.252	47.3391	190.419	19.4074
Sensory transduction histidine kinase] [protein_id=AKB53958.1	911	Sensory transduction histidine kinase	AKB53958.1	244.336	22.2083	283.213	51.1563	256.467	16.5808	237.488	23.3712	272.931	18.039	261.219	18.2595	272.81	23.9427	251.607	19.3206
response regulator receiver] [protein_id=AKB53959.1	912	response regulator receiver	AKB53959.1	63.2108	18.2078	89.4132	14.3313	67.5308	9.65038	57.4864	4.1951	50.1261	8.31914	86.5909	1.83461	70.4202	15.4442	59.3267	12.6139
response regulator receiver] [protein_id=AKB53960.1	913	response regulator receiver	AKB53960.1	76.1428	1.21149	97.0892	0.554644	196.101	13.2464	240.42	21.8986	69.6972	23.6017	136.829	42.9186	117.48	56.3639	91.0566	15.6954
Transcriptional regulator, TrmB family] [protein_id=AKB53961.1	914	Transcriptional regulator, TrmB family	AKB53961.1	18.622	6.47963	26.5263	16.4534	16.676	1.30524	20.1706	6.33154	24.8581	2.69821	7.91719	4.77088	42.1358	39.3852	46.2017	12.9114
Transcriptional regulator, MarR family] [protein_id=AKB53962.1	915	Transcriptional regulator, MarR family	AKB53962.1	42.299	11.7034	15.4619	7.11788	8.4699	4.22246	13.9093	4.12013	15.6383	11.4671	9.18043	2.18792	16.6524	7.41271	47.632	25.7284
MoxR-related protein] [protein_id=AKB53963.1	916	MoxR-related protein	AKB53963.1	66.3762	19.8873	52.756	14.8073	67.5532	4.08423	79.7857	12.6363	73.1714	0.859482	50.7355	17.5581	56.7096	23.5243	64.7445	10.6759
hypothetical protein] [protein_id=AKB53964.1	917	hypothetical protein	AKB53964.1	20.4033	5.09061	17.8977	8.29385	13.8962	3.82192	17.7615	7.52822	18.3978	0.50219	20.0016	6.96165	14.2203	6.09097	17.6508	5.76388
Multi antimicrobial extrusion protein (Na(+)/drug antiporter), MATE family of MDR efflux pumps] [protein_id=AKB53965.1	918	Multi antimicrobial extrusion protein (Na(+)/drug antiporter), MATE family of MDR efflux pumps	AKB53965.1	138.308	25.0052	172.85	23.2831	134.878	10.501	128.923	21.9117	113.843	34.3033	191.57	26.7961	111.119	44.5823	117.922	38.7508
Transcriptional regulator, MarR family] [protein_id=AKB53966.1	919	Transcriptional regulator, MarR family	AKB53966.1	46.066	22.4524	52.432	17.1233	45.7905	7.10647	54.1001	2.73812	43.9033	2.12928	60.9881	7.36582	49.9152	5.38976	49.0216	4.2407
Cell division protein FtsX] [protein_id=AKB53967.1	920	Cell division protein FtsX	AKB53967.1	110.378	16.4008	132.044	2.02499	185.792	13.433	172.197	57.9256	112.336	26.527	127.906	10.2862	144.64	25.6677	173.863	7.12597
hypothetical protein] [protein_id=AKB53968.1	921	hypothetical protein	AKB53968.1	140.949	43.6536	182.668	26.8872	220.204	18.2856	198.819	46.9052	166.075	21.4328	137.475	19.1962	234.908	101.393	246.875	49.6746
ABC transporter, ATP-binding protein] [protein_id=AKB53969.1	922	ABC transporter, ATP-binding protein	AKB53969.1	100.559	54.9886	115.714	25.4185	184.097	27.3374	135.141	12.7675	140.21	48.8712	91.3778	13.103	175.847	87.8138	142.086	42.9748
Cell division protein FtsX] [protein_id=AKB53970.1	923	Cell division protein FtsX	AKB53970.1	78.5489	17.4039	71.3819	17.1389	95.6149	16.4745	86.8395	16.1864	72.4791	12.8722	75.4992	5.32203	68.4111	8.99432	78.8294	13.4161
hypothetical protein] [protein_id=AKB53971.1	924	hypothetical protein	AKB53971.1	93.1396	10.0604	77.5361	24.6063	109.051	7.27085	89.6639	5.61234	116.004	12.5996	76.4618	9.59187	104.381	31.4424	107.452	21.7954
ABC transporter, ATP-binding protein] [protein_id=AKB53972.1	925	ABC transporter, ATP-binding protein	AKB53972.1	111.095	67.2865	114.146	14.3545	131.38	31.3321	131.683	18.2701	113.604	17.0941	89.2531	14.2881	142.55	60.3299	133.804	38.0498
Multi antimicrobial extrusion protein (Na(+)/drug antiporter), MATE family of MDR efflux pumps] [protein_id=AKB53973.1	926	Multi antimicrobial extrusion protein (Na(+)/drug antiporter), MATE family of MDR efflux pumps	AKB53973.1	124.616	21.566	139.269	28.61	110.132	17.2726	109.722	12.0247	128.675	38.9317	137.094	25.6855	95.2923	22.5584	122.255	52.5618
Transcriptional regulator, MarR family] [protein_id=AKB53974.1	927	Transcriptional regulator, MarR family	AKB53974.1	46.0579	18.3356	42.7678	12.6975	36.5998	3.96025	49.1995	7.85433	47.1248	8.28441	51.6979	0.467467	46.9453	4.2469	39.9113	4.88673
putative flavin-nucleotide-binding protein] [protein_id=AKB53975.1	928	putative flavin-nucleotide-binding protein	AKB53975.1	5.64175	1.93498	4.62251	3.0282	4.91649	3.14329	6.29972	2.35538	5.29245	2.9867	1.67137	1.04927	3.88323	0.946414	5.64291	1.60407
membrane protein, putative] [protein_id=AKB53976.1	929	membrane protein, putative	AKB53976.1	54.2515	14.5477	40.1949	4.51829	52.8278	5.56182	64.5533	8.0022	58.64	5.97043	39.8218	5.80043	60.5312	18.4288	77.5502	4.04824
hypothetical protein] [protein_id=AKB53977.1	930	hypothetical protein	AKB53977.1	9.59517	5.03667	5.85674	4.25379	3.70877	3.38709	6.20178	2.16732	6.24071	3.87875	9.34642	1.10959	5.83644	3.43028	2.58358	2.06531
Amino acid permease] [protein_id=AKB53978.1	931	Amino acid permease	AKB53978.1	41.9677	14.6496	20.4049	5.70049	20.7701	3.85282	27.0666	6.53481	36.9572	15.7755	25.0418	2.48007	18.0057	8.05524	27.3993	10.0549
hypothetical protein] [protein_id=AKB53979.1	932	hypothetical protein	AKB53979.1	5.51407	2.98477	3.61269	1.53384	5.57857	2.25214	6.47855	7.29789	2.75904	4.02271	2.94687	2.6121	1.37402	1.1911	5.26241	3.06347
photosystem I assembly protein Ycf3] [protein_id=AKB53980.1	933	photosystem I assembly protein Ycf3	AKB53980.1	101.88	50.3844	67.3755	31.4253	54.4853	27.8085	42.8177	5.22199	59.4731	28.1718	47.6529	8.40221	86.5861	29.6981	89.2044	34.3032
hypothetical protein] [protein_id=AKB53981.1	934	hypothetical protein	AKB53981.1	9.01737	6.4438	8.5594	1.52824	8.32007	0.519063	13.4341	2.92782	7.94912	0.99692	7.83194	2.61298	12.709	5.01572	12.9185	3.88461
hypothetical protein] [protein_id=AKB53982.1	935	hypothetical protein	AKB53982.1	58.6845	12.7003	35.6057	2.91656	33.8379	10.6413	25.851	4.79253	56.0254	14.5625	39.7557	3.00252	56.8925	12.4048	60.6321	14.5724
Thioredoxin] [protein_id=AKB53983.1	936	Thioredoxin	AKB53983.1	5.27799	2.68583	5.10896	2.95412	4.38332	2.52551	6.48102	5.58207	7.4162	1.9079	3.13523	2.30922	7.14212	3.70117	6.21499	2.89623
hypothetical protein] [protein_id=AKB53984.1	937	hypothetical protein	AKB53984.1	4.2787	0.851504	3.67886	2.95855	5.05585	3.5971	3.60518	1.67142	3.7577	0.802876	3.00525	2.90363	2.25472	2.38746	5.66578	4.10993
Peptidyl-prolyl cis-trans isomerase] [protein_id=AKB53985.1	938	Peptidyl-prolyl cis-trans isomerase	AKB53985.1	124.031	20.2913	115.387	14.9982	86.4332	15.5196	77.8599	13.4223	100.835	4.72258	110.956	15.2499	96.3535	28.9697	82.6641	11.5231
Ribonucleotide reductase of class II (coenzyme B12-dependent)] [protein_id=AKB53986.1	939	Ribonucleotide reductase of class II (coenzyme B12-dependent)	AKB53986.1	29.7239	8.33548	15.199	3.01503	32.6685	3.76809	34.3979	2.65994	23.1635	3.72334	12.8013	1.40758	11.6428	3.89838	16.759	1.49364
Isoleucyl-tRNA synthetase] [protein_id=AKB53987.1	940	Isoleucyl-tRNA synthetase	AKB53987.1	1096.89	176.078	1354.89	11.6226	1063.63	64.2111	1163.44	134.694	1333.49	103.261	1410.5	83.5306	1459.3	104.824	1326.79	39.0384
6-hydroxymethyl-7,8-dihydropterin pyrophosphokinase] [protein_id=AKB53988.1	941	6-hydroxymethyl-7,8-dihydropterin pyrophosphokinase	AKB53988.1	33.5045	11.9483	59.4326	2.83647	47.2885	9.0268	44.6574	8.45936	61.8478	2.38942	48.8991	6.66758	47.5916	6.64338	52.529	9.22548
hypothetical protein] [protein_id=AKB53989.1	942	hypothetical protein	AKB53989.1	0.782786	1.35583	0.976539	0.976249	1.12109	1.24795	0.823575	0.936999	0.161868	0.280363	0.639368	1.10742	1.50252	0.46255	2.49577	1.52143
Inorganic pyrophosphatase] [protein_id=AKB53990.1	943	Inorganic pyrophosphatase	AKB53990.1	48.9068	3.07748	37.784	24.9718	96.1271	14.6522	92.9997	22.7767	29.6074	9.76536	47.8064	13.6323	42.4717	11.2451	51.2209	20.4379
sensory transduction histidine kinase] [protein_id=AKB53991.1	944	sensory transduction histidine kinase	AKB53991.1	133.446	17.1214	134.519	5.25334	153.891	33.4548	143.006	14.9717	125.061	33.4926	120.969	13.5893	132.202	4.75786	128.301	10.4271
Multiple antibiotic resistance protein] [protein_id=AKB53992.1	945	Multiple antibiotic resistance protein	AKB53992.1	47.0537	12.2359	20.3719	8.27621	43.0919	6.25537	30.5375	10.7584	24.313	4.56895	26.6438	4.07775	22.0795	2.01015	29.9446	5.07435
Flagella-related protein FlaI] [protein_id=AKB53993.1	946	Flagella-related protein FlaI	AKB53993.1	15.4271	4.50638	9.63139	6.22072	15.6938	3.20139	18.8898	4.51957	22.5142	4.17276	10.1987	5.79244	11.0761	1.86039	15.6414	6.12191
hypothetical protein] [protein_id=AKB53994.1	947	hypothetical protein	AKB53994.1	26.3997	1.72232	24.7697	4.56657	32.565	6.0762	26.4619	6.17905	39.0949	6.76124	25.4545	7.24813	32.2217	5.56385	28.652	9.06796
Mobile element protein] [protein_id=AKB53995.1	948	Mobile element protein	AKB53995.1	6.46403	2.28121	3.87282	2.8789	9.23211	4.64457	6.7726	5.94069	8.57337	8.99988	8.03302	5.91355	8.11119	5.62468	10.0555	3.85974
cell surface protein] [protein_id=AKB53996.1	949	cell surface protein	AKB53996.1	43.2527	45.6096	51.7535	11.2845	54.2839	12.2916	64.8185	21.8182	29.7095	7.23071	43.2274	8.39505	31.5178	8.59714	37.0019	12.1622
hypothetical protein] [protein_id=AKB53997.1	950	hypothetical protein	AKB53997.1	18.2309	2.37186	15.7531	1.81561	25.4735	6.72997	17.7845	6.79585	28.5974	4.80817	14.3213	2.34386	21.175	7.33298	19.7045	10.5887
hypothetical protein] [protein_id=AKB53998.1	951	hypothetical protein	AKB53998.1	17.5111	8.6382	12.4983	5.86734	13.0783	2.28633	17.0307	5.04476	9.01334	2.42868	12.7229	4.1771	6.87574	3.35025	11.1533	8.0316
hypothetical protein] [protein_id=AKB53999.1	952	hypothetical protein	AKB53999.1	26.1688	13.5878	23.5336	5.01278	37.6093	8.96911	45.6406	4.80049	43.0906	13.3361	17.4912	4.76155	34.6569	10.9393	38.5564	8.67934
hypothetical protein] [protein_id=AKB54000.1	953	hypothetical protein	AKB54000.1	83.3797	38.6518	88.6266	17.3149	108.887	23.39	96.618	7.23276	79.4958	1.56056	91.9862	11.3332	102.757	21.9398	83.9834	3.955
hypothetical protein] [protein_id=AKB54001.1	954	hypothetical protein	AKB54001.1	6.54134	3.27463	4.6554	2.74188	5.90962	5.98973	4.88603	4.48949	3.7608	0.820072	4.28854	3.04819	4.93756	2.64879	4.7835	3.51845
metal-dependent phosphohydrolase] [protein_id=AKB54002.1	955	metal-dependent phosphohydrolase	AKB54002.1	30.9459	23.1506	30.1715	5.98079	42.0654	4.83679	30.121	11.2286	27.8191	12.1569	31.8261	2.67539	23.7738	5.64848	35.6481	19.9547
Methylenetetrahydrofolate dehydrogenase (NADP+)] [protein_id=AKB54003.1	956	Methylenetetrahydrofolate dehydrogenase (NADP+)	AKB54003.1	327.816	56.8693	368.865	20.8645	361.057	42.7194	371.863	32.2566	419.699	7.58607	427.491	50.7758	511.548	87.5508	466.566	46.5788
Serine hydroxymethyltransferase / L-threonine aldolase / L-allo-threonine aldolase] [protein_id=AKB54004.1	957	Serine hydroxymethyltransferase / L-threonine aldolase / L-allo-threonine aldolase	AKB54004.1	537.955	126.217	560.936	47.838	475.854	26.0217	465.289	49.8691	608.042	44.3096	634.37	25.7607	723.705	89.2067	687.08	38.8471
Phosphoribosylglycinamide formyltransferase] [protein_id=AKB54005.1	958	Phosphoribosylglycinamide formyltransferase	AKB54005.1	126.465	60.2759	120.523	3.94713	125.812	10.3879	141.456	15.0069	173.751	23.1045	116.777	2.39955	183.954	63.4231	195.441	37.621
HTH DNA-binding protein] [protein_id=AKB54006.1	959	HTH DNA-binding protein	AKB54006.1	242.209	22.5036	155.467	35.1449	270.045	4.2791	292.095	34.835	172.772	18.1885	202.239	17.0341	213.785	7.37553	210.37	4.42133
OB-fold nucleic acid binding domain protein] [protein_id=AKB54007.1	960	OB-fold nucleic acid binding domain protein	AKB54007.1	96.8226	16.0623	115.611	24.0362	142.07	13.7515	113.034	12.53	133.891	7.94461	129.95	0.502891	118.555	11.0968	122.999	25.7814
NAD synthetase] [protein_id=AKB54008.1	961	NAD synthetase	AKB54008.1	164.845	34.7674	158.274	10.413	156.378	4.53894	154.895	13.2583	188.62	40.4417	183.752	12.3487	225.739	52.3886	178.243	23.2697
Cell division protein FtsH] [protein_id=AKB54009.1	962	Cell division protein FtsH	AKB54009.1	861.187	88.0595	1132.35	65.4846	935.91	46.0758	1091.82	155.14	895.657	69.4976	1133.74	35.5742	1065.28	92.5167	941.069	53.7698
hypothetical protein] [protein_id=AKB54010.1	963	hypothetical protein	AKB54010.1	38.3361	16.5131	32.3173	13.9166	30.9675	6.73251	40.526	6.29653	33.2774	13.9852	36.5598	9.44254	25.2112	7.85932	21.4031	6.6633
Cell surface protein] [protein_id=AKB54011.1	964	Cell surface protein	AKB54011.1	81.7456	17.7118	77.1358	6.37474	113.458	6.75233	112.215	17.5468	81.1919	14.1381	78.2806	11.8972	86.0884	5.7657	100.428	14.1079
hypothetical protein] [protein_id=AKB54012.1	965	hypothetical protein	AKB54012.1	43.8672	19.7453	35.9359	8.27085	34.1605	4.17215	34.3059	3.88279	31.6239	2.0231	33.3206	7.94856	31.2401	2.52559	39.999	10.9952
Phosphoesterase] [protein_id=AKB54013.1	966	Phosphoesterase	AKB54013.1	28.1524	4.99256	21.7424	6.14866	24.7098	4.32145	20.925	5.06438	25.7121	6.79316	22.5021	3.64424	25.8543	1.76466	22.295	3.3844
GTP-binding protein EngB] [protein_id=AKB54014.1	967	GTP-binding protein EngB	AKB54014.1	19.8682	9.56325	23.6924	15.0523	34.1336	6.7363	39.515	9.9201	23.1972	6.70543	23.1114	5.8448	30.6865	6.5567	31.4043	6.18983
transcriptional regulator, ArsR family] [protein_id=AKB54015.1	968	transcriptional regulator, ArsR family	AKB54015.1	2.05207	1.25824	1.33425	0.619329	3.44789	2.49319	7.13788	2.40323	1.15892	0.386298	1.64446	0.591323	2.36567	0.698502	2.50536	1.37803
hypothetical protein] [protein_id=AKB54016.1	969	hypothetical protein	AKB54016.1	1.96324	1.36465	7.45361	3.99005	4.20809	3.15859	4.84969	0.599733	5.22528	3.46905	2.86937	1.64854	3.86818	0.872082	5.64503	5.70305
ATP-dependent DNA ligase] [protein_id=AKB54017.1	970	ATP-dependent DNA ligase	AKB54017.1	210.395	35.2824	254.814	35.6787	241.607	17.8408	223.389	6.6337	266.741	20.6901	257.655	27.2965	253.234	19.8966	294.875	46.0807
Homoserine dehydrogenase] [protein_id=AKB54018.1	971	Homoserine dehydrogenase	AKB54018.1	145.543	65.6618	147.704	25.5116	128.705	15.0738	158.959	11.0595	177.517	9.8631	131.398	9.16705	192.369	54.8535	173.698	32.1041
ACT-domain-containing protein, predicted allosteric regulator of homoserine dehydrogenase] [protein_id=AKB54019.1	972	ACT-domain-containing protein, predicted allosteric regulator of homoserine dehydrogenase	AKB54019.1	42.6365	12.4051	28.3195	7.82977	35.5289	9.71816	35.0476	10.5094	36.4812	5.12619	30.2752	13.2822	47.964	22.434	30.4391	16.3398
hypothetical protein] [protein_id=AKB54020.1	973	hypothetical protein	AKB54020.1	101.934	18.648	103.431	13.3984	148.548	10.008	145.381	14.9683	105.771	26.6873	111.851	20.0922	109.072	24.589	114.151	22.632
hypothetical protein] [protein_id=AKB54021.1	974	hypothetical protein	AKB54021.1	4947.69	695.583	4464.8	646.215	4614.75	115.552	4570.89	612.678	3421.53	247.198	4552.04	380.041	3928.08	387.695	4611.54	651.219
hypothetical protein] [protein_id=AKB54022.1	975	hypothetical protein	AKB54022.1	320.519	71.1282	250.765	37.2225	438.761	82.6678	339.505	96.8078	275.564	30.5988	246.534	34.8382	324.126	101.305	328.621	46.6093
hypothetical protein] [protein_id=AKB54023.1	976	hypothetical protein	AKB54023.1	115.356	42.8793	91.6114	22.8047	110.103	13.1736	122.913	23.1665	78.207	22.1886	112.613	13.0755	75.683	43.2634	77.9651	25.2668
hypothetical protein] [protein_id=AKB54024.1	977	hypothetical protein	AKB54024.1	32.2206	12.4166	46.7427	10.9665	33.7826	7.93992	35.4137	2.24863	45.9728	11.499	47.1759	13.0491	48.9449	15.036	48.8971	12.3527
putative small heat shock protein] [protein_id=AKB54025.1	978	putative small heat shock protein	AKB54025.1	131.485	57.7885	145.355	27.3347	110.269	4.41253	106.541	40.7459	94.6254	29.4741	125.564	3.49676	98.521	26.6238	106.853	22.3627
Rubrerythrin] [protein_id=AKB54026.1	979	Rubrerythrin	AKB54026.1	243.453	32.9898	190.215	31.2283	210.408	28.7081	202.296	34.7184	205.937	3.73883	167.348	11.245	179.229	10.556	157.679	15.2206
hypothetical protein] [protein_id=AKB54027.1	980	hypothetical protein	AKB54027.1	12.6192	6.9324	12.7904	6.67925	12.2837	3.57687	13.0107	0.909546	7.10484	1.85748	11.3735	3.54324	5.59259	3.48807	4.21622	0.585624
Lead, cadmium, zinc and mercury transporting ATPase] [protein_id=AKB54028.1	981	Lead, cadmium, zinc and mercury transporting ATPase	AKB54028.1	365.51	30.1265	516.482	79.8158	369.841	49.6973	371.442	21.62	438.387	82.1162	443.219	52.927	375.505	117.938	290.335	56.044
hypothetical protein] [protein_id=AKB54029.1	982	hypothetical protein	AKB54029.1	58.1057	10.7525	79.8391	10.9982	67.4483	10.7869	68.5297	9.15118	68.7557	5.73048	73.6458	12.5595	61.7299	23.3514	43.9896	8.87849
Lead, cadmium, zinc and mercury transporting ATPase] [protein_id=AKB54030.1	983	Lead, cadmium, zinc and mercury transporting ATPase	AKB54030.1	59.5416	17.1303	75.2877	31.8654	66.3446	13.6292	59.6332	7.14642	65.3638	14.1467	57.0814	14.4241	50.9144	8.75574	35.082	11.2397
dTDP-4-dehydrorhamnose 3,5-epimerase] [protein_id=AKB54031.1	984	dTDP-4-dehydrorhamnose 3,5-epimerase	AKB54031.1	324.774	134.739	551.626	33.4812	197.652	33.8922	275.675	39.0251	360.634	74.0691	457.567	50.439	197.301	191.192	86.6037	15.7173
Fmn-binding protein] [protein_id=AKB54032.1	985	Fmn-binding protein	AKB54032.1	656.402	151.806	1048.86	332.974	429.216	58.2748	446.837	38.4837	769.33	163.032	686.5	16.3556	365.182	288.411	188.464	31.6896
Nickel insertion protein] [protein_id=AKB54033.1	986	Nickel insertion protein	AKB54033.1	2700.6	832.644	5263.55	740.551	1747.01	289.495	2619.78	139.001	3024.92	1240.97	4014.22	371.759	1777.49	1885.94	647.223	36.6353
Transcriptional regulator, HxlR family] [protein_id=AKB54034.1	987	Transcriptional regulator, HxlR family	AKB54034.1	3.94604	4.64979	2.37638	1.86897	2.48462	0.345026	1.84303	3.19222	1.92546	1.12085	3.6346	4.45537	0.974094	0.959406	3.07954	2.98519
heavy-metal-associated protein] [protein_id=AKB54035.1	988	heavy-metal-associated protein	AKB54035.1	26.3948	2.52837	22.2945	2.29844	33.5078	4.8641	32.4396	8.09123	22.9363	9.24581	29.8118	10.1935	19.0344	3.97732	16.6627	1.44626
Copper(I) chaperone CopZ] [protein_id=AKB54036.1	989	Copper(I) chaperone CopZ	AKB54036.1	35.7864	9.31384	49.903	22.814	46.2182	13.0198	34.7026	0.934336	51.6312	9.23145	38.0621	12.4265	40.8675	5.72549	29.7127	13.6469
hypothetical protein] [protein_id=AKB54037.1	990	hypothetical protein	AKB54037.1	22.0695	9.76967	21.224	7.80033	23.7465	2.69283	21.5952	2.74126	18.526	4.54245	14.8822	1.81382	9.0433	5.57442	12.2517	10.9637
hypothetical protein] [protein_id=AKB54038.1	991	hypothetical protein	AKB54038.1	67.8241	18.481	94.8162	12.8713	87.9818	1.93483	90.8738	16.0215	77.3729	23.5696	86.1171	12.2309	60.6015	33.1489	50.1822	18.472
hypothetical protein] [protein_id=AKB54039.1	992	hypothetical protein	AKB54039.1	8.20415	4.42116	11.1963	3.91102	14.9062	4.54856	10.079	5.6366	10.0059	2.04746	8.827	0.70609	10.2782	2.65621	7.1803	3.08703
ABC1 family protein] [protein_id=AKB54040.1	993	ABC1 family protein	AKB54040.1	46.6596	8.45387	35.2792	13.0004	68.1955	0.795449	54.5574	12.466	35.426	1.87737	43.9904	4.95312	39.7242	0.838941	32.6357	6.89263
Phosphatidylethanolamine N-methyltransferase] [protein_id=AKB54041.1	994	Phosphatidylethanolamine N-methyltransferase	AKB54041.1	9.60177	4.54156	6.24826	3.24667	10.5538	1.19402	9.82649	2.95245	10.0183	3.10106	11.6708	5.07914	5.46409	2.02346	7.39208	3.47115
hypothetical protein] [protein_id=AKB54042.1	995	hypothetical protein	AKB54042.1	0.780324	0.828324	0.487951	0.845156	2.40448	1.34156	2.69578	1.47059	1.84752	1.52587	1.13187	1.00776	0.669451	1.15952	5.65354	3.89113
hypothetical protein] [protein_id=AKB54043.1	996	hypothetical protein	AKB54043.1	9.00159	6.04924	6.21655	2.07147	6.65089	1.71964	5.81002	3.66597	7.03599	1.74245	5.21061	4.5134	5.33748	4.72451	5.94891	3.11481
Argininosuccinate lyase] [protein_id=AKB54044.1	997	Argininosuccinate lyase	AKB54044.1	213.437	53.9284	273.903	38.5696	232.838	29.077	305.547	65.9936	274.97	39.705	260.456	24.5104	296.886	20.607	321.416	13.674
Glutamyl-tRNA(Gln) amidotransferase asparaginase subunit] [protein_id=AKB54045.1	998	Glutamyl-tRNA(Gln) amidotransferase asparaginase subunit	AKB54045.1	296.91	12.8728	308.309	34.2831	253.223	0.832557	255.783	14.7274	274.111	29.4323	310.926	32.2762	315.408	11.269	264.972	55.4439
Sodium/proline symporter] [protein_id=AKB54046.1	999	Sodium/proline symporter	AKB54046.1	197.613	28.9933	157.079	31.2852	118.938	5.88348	167.894	13.2997	152.373	21.5616	157.855	53.6018	186.301	30.9236	152.735	25.4082
Transcriptional regulator] [protein_id=AKB54047.1	1000	Transcriptional regulator	AKB54047.1	67.4371	6.01003	80.0029	10.8491	97.7227	14.7907	89.3058	16.9118	75.5473	0.576715	88.4903	17.5727	82.4285	18.337	66.1127	4.34766
Transcriptional regulator] [protein_id=AKB54048.1	1001	Transcriptional regulator	AKB54048.1	184.935	23.0178	189.401	16.8541	194.631	30.3208	184.262	18.2333	203.301	21.7305	200.039	30.0826	190.616	7.27203	203.516	6.7402
Transcriptional regulator] [protein_id=AKB54049.1	1002	Transcriptional regulator	AKB54049.1	350.745	73.3626	286.042	42.445	312.585	53.6602	284.846	38.8731	334.538	17.1715	328.769	48.0726	343.64	20.4844	324.973	32.5539
acetyl-CoA decarbonylase/synthase complex subunit alpha] [protein_id=AKB54050.1	1003	acetyl-CoA decarbonylase/synthase complex subunit alpha	AKB54050.1	112.402	23.1764	111.77	11.5506	129.911	22.8087	138.008	12.2475	129.791	21.1314	138.296	18.8634	142.685	8.02969	131.899	10.9019
hypothetical protein] [protein_id=AKB54051.1	1004	hypothetical protein	AKB54051.1	4.50079	3.02462	8.56359	8.66849	7.02376	2.23375	6.72189	1.33252	8.61354	3.89546	7.17025	3.45895	6.73471	5.05641	5.72218	4.17488
hypothetical protein] [protein_id=AKB54052.1	1005	hypothetical protein	AKB54052.1	65.2412	22.5539	65.43	23.7457	53.1289	6.84851	49.4075	8.07833	64.0219	4.76504	61.5063	9.15324	74.1605	3.69351	66.2585	8.22995
hypothetical protein] [protein_id=AKB54053.1	1006	hypothetical protein	AKB54053.1	7.51122	3.29152	5.04494	4.26444	4.10703	2.66386	8.28198	3.65006	5.68935	2.70585	3.05225	1.67108	2.30299	2.40323	2.47395	2.91541
hypothetical protein] [protein_id=AKB54054.1	1007	hypothetical protein	AKB54054.1	14.5642	13.8181	12.2368	2.76362	17.3316	2.69342	19.3057	2.53498	16.6995	7.81556	15.3387	0.913266	16.0569	1.1575	22.4854	14.5904
hypothetical protein] [protein_id=AKB54055.1	1008	hypothetical protein	AKB54055.1	4.17654	4.57864	3.83999	4.30127	3.37422	2.4871	3.61729	1.53387	4.2036	2.20107	2.51502	2.04359	2.43338	3.41798	3.25674	4.9538
sensory transduction histidine kinase] [protein_id=AKB54056.1	1009	sensory transduction histidine kinase	AKB54056.1	0.549829	0.952331	1.36661	1.47413	0.299193	0.518217	0	0	0.624522	0.541946	1.02973	0.966834	1.64354	1.52492	1.00418	1.73928
hypothetical protein] [protein_id=AKB54058.1	1010	hypothetical protein	AKB54058.1	2.01012	1.15455	0.520596	0.491354	2.47169	2.52641	2.37896	2.31587	1.34684	1.80611	0.834549	0.982998	1.83724	0.222831	1.13295	0.767147
hypothetical protein] [protein_id=AKB54059.1	1011	hypothetical protein	AKB54059.1	1.51623	1.32822	0.487951	0.845156	1.19278	1.033	4.63551	4.21279	1.73155	0.735779	2.41743	2.10401	3.42	2.22348	1.62786	2.11372
hypothetical protein] [protein_id=AKB54060.1	1012	hypothetical protein	AKB54060.1	5.60081	4.13309	8.39989	6.45876	6.284	2.39347	6.20055	2.99036	6.22543	3.76587	3.79604	2.01963	4.90748	1.70157	6.24477	2.49371
cell surface protein] [protein_id=AKB54061.1	1013	cell surface protein	AKB54061.1	108.368	46.3116	116.569	61.8343	63.8599	15.8738	87.4202	7.35572	158.736	60.5517	56.7293	13.2129	95.637	37.918	92.3584	14.9877
hypothetical protein] [protein_id=AKB54062.1	1014	hypothetical protein	AKB54062.1	42.7398	22.8721	29.2944	8.68788	28.2255	10.5474	22.6795	15.8094	45.3497	11.2802	27.429	6.41297	23.9243	8.02148	26.3899	6.43797
hypothetical protein] [protein_id=AKB54063.1	1015	hypothetical protein	AKB54063.1	30.5262	3.53592	34.5939	12.7021	36.2812	3.24009	31.8003	13.1039	23.9514	5.12146	28.4934	6.09446	20.8691	2.70125	17.6706	1.95453
hypothetical protein] [protein_id=AKB54064.1	1016	hypothetical protein	AKB54064.1	45.4206	8.48986	43.3572	9.70707	27.5797	2.41829	29.7968	14.676	56.1718	13.8188	35.1699	7.25872	44.0506	1.86309	37.2245	9.29801
ABC transporter, permease protein] [protein_id=AKB54065.1	1017	ABC transporter, permease protein	AKB54065.1	62.092	11.8828	78.0531	24.7596	41.6994	11.097	47.7665	6.21383	104.185	40.848	41.8484	15.3523	52.6125	4.02877	64.322	9.2286
Cell surface protein] [protein_id=AKB54066.1	1018	Cell surface protein	AKB54066.1	38.9763	10.3456	38.3435	11.767	40.9587	6.06237	51.229	5.10731	60.7365	9.62174	27.9504	5.71786	36.7518	2.05435	39.22	1.82796
hypothetical protein] [protein_id=AKB54067.1	1019	hypothetical protein	AKB54067.1	58.7129	9.4136	82.998	22.5246	76.8859	4.37432	94.9914	20.6941	94.4849	14.2059	51.6125	8.55288	81.619	40.7511	109.6	16.2173
cell surface glycoprotein] [protein_id=AKB54068.1	1020	cell surface glycoprotein	AKB54068.1	38.6628	9.59485	43.2596	9.85789	28.5276	11.8718	28.5273	7.1927	70.6039	17.7842	33.814	3.54675	35.8604	5.5624	34.4807	16.2429
Retron-type RNA-directed DNA polymerase] [protein_id=AKB54069.1	1021	Retron-type RNA-directed DNA polymerase	AKB54069.1	0	0	4.33062	4.26661	3.26869	1.03011	4.65381	0.981887	7.04237	5.67362	3.30581	2.60942	1.59842	2.76855	1.9865	2.18964
cell surface protein] [protein_id=AKB54070.1	1022	cell surface protein	AKB54070.1	900.522	139.874	1251.32	418.392	673.931	26.8204	838.89	54.1738	1635.76	90.6832	809.48	35.8766	1067.19	231.184	1041.14	69.6778
Corrinoid methyltransferase protein] [protein_id=AKB54071.1	1023	Corrinoid methyltransferase protein	AKB54071.1	12.8945	1.19634	12.7268	3.53888	12.7014	2.6654	14.8562	2.32345	21.7218	2.43535	15.4879	3.20061	22.0193	10.006	22.453	9.40304
surface layer protein B] [protein_id=AKB54072.1	1024	surface layer protein B	AKB54072.1	19.9671	6.06299	16.0124	3.41572	25.5058	1.65165	15.2359	6.67484	21.5329	5.48507	20.3724	10.9257	18.3894	5.18168	18.5066	11.4547
CobN-like chelatase BtuS for metalloporphyrine salvage] [protein_id=AKB54073.1	1025	CobN-like chelatase BtuS for metalloporphyrine salvage	AKB54073.1	5.41125	2.22167	2.56999	3.63879	2.64491	1.7326	5.36856	0.981617	3.77756	0.959119	2.88394	3.4692	0.81551	0.990755	1.75768	1.6413
Substrate-specific component CbiM of cobalt ECF transporter] [protein_id=AKB54074.1	1026	Substrate-specific component CbiM of cobalt ECF transporter	AKB54074.1	61.3064	16.4669	65.4828	8.76136	48.1198	8.3365	69.7371	19.6918	58.8425	12.1524	60.6808	4.29873	72.5734	16.9139	97.6243	25.51
Additional substrate-specific component CbiN of cobalt ECF transporter] [protein_id=AKB54075.1	1027	Additional substrate-specific component CbiN of cobalt ECF transporter	AKB54075.1	30.1121	2.51994	20.4755	8.97381	21.0697	7.11272	17.0381	0.502091	32.8024	7.462	21.8559	5.9893	30.2534	4.08825	30.4491	3.12819
Cobalt-zinc-cadmium resistance protein] [protein_id=AKB54076.1	1028	Cobalt-zinc-cadmium resistance protein	AKB54076.1	13.6395	5.03325	20.2449	6.56658	22.8166	2.01771	13.5138	2.66221	18.2318	8.29331	18.7949	6.66784	12.2038	2.58245	21.8096	7.60537
Transmembrane component CbiQ of energizing module of cobalt ECF transporter] [protein_id=AKB54077.1	1029	Transmembrane component CbiQ of energizing module of cobalt ECF transporter	AKB54077.1	85.2832	27.3541	62.3911	9.22211	56.4857	7.96382	60.89	12.9715	66.8515	18.4646	69.2196	3.85236	72.6473	8.84754	70.3901	20.8712
ATPase component CbiO of energizing module of cobalt ECF transporter] [protein_id=AKB54078.1	1030	ATPase component CbiO of energizing module of cobalt ECF transporter	AKB54078.1	63.7775	17.2378	48.3694	9.50995	34.955	4.76741	30.4636	3.27036	56.7115	6.20368	41.4407	3.52176	49.9271	15.9045	51.7692	16.2344
hypothetical protein] [protein_id=AKB54079.1	1031	hypothetical protein	AKB54079.1	483.406	219.361	428.054	63.2738	178.33	44.2163	387.683	85.8733	366.53	99.1602	313.473	39.2764	284.558	88.3542	257.777	62.9088
hypothetical protein] [protein_id=AKB54080.1	1032	hypothetical protein	AKB54080.1	49.6915	25.8444	28.9044	6.88468	32.7521	9.48626	30.7163	10.2804	44.783	3.24765	40.7978	11.9327	49.4113	3.66718	34.2168	9.74094
Mobile element protein] [protein_id=AKB54081.1	1033	Mobile element protein	AKB54081.1	39.6961	13.5726	41.1054	11.0156	34.505	12.2762	30.0814	5.86832	31.0701	8.71173	41.7403	11.6489	23.3864	7.35522	28.4136	9.38892
Mobile element protein] [protein_id=AKB54082.1	1034	Mobile element protein	AKB54082.1	99.9955	6.3465	96.0114	10.705	94.9055	6.83133	94.6357	42.2698	75.7098	20.989	92.8882	13.5333	98.4802	19.9427	96.2676	28.7266
CO dehydrogenase/acetyl-CoA synthase subunit delta, corrinoid iron-sulfur subcomplex small subunit] [protein_id=AKB54083.1	1035	CO dehydrogenase/acetyl-CoA synthase subunit delta, corrinoid iron-sulfur subcomplex small subunit	AKB54083.1	5.97507	2.18849	1.62737	2.03208	4.37334	4.70819	3.61482	3.29511	3.82945	1.52341	0.959052	1.66113	2.15693	0.658633	1.99982	1.18299
Mobile element protein] [protein_id=AKB54084.1	1036	Mobile element protein	AKB54084.1	11.1425	8.21095	2.47362	1.329	3.30253	2.08328	5.45439	2.59322	1.96208	1.38338	3.73993	0.995665	1.99834	0.941803	1.82154	0.737658
Cobyrinic acid A,C-diamide synthase] [protein_id=AKB54085.1	1037	Cobyrinic acid A,C-diamide synthase	AKB54085.1	39.5527	1.46512	28.9667	1.47683	38.5841	7.85875	37.2663	6.85318	28.5643	5.15785	28.675	5.21898	25.44	7.04399	22.5898	1.32
hypothetical protein] [protein_id=AKB54086.1	1038	hypothetical protein	AKB54086.1	20.1312	11.4956	16.9557	5.36914	16.0597	8.07193	13.5504	7.19357	14.3106	5.69353	16.8039	5.35424	13.789	1.9794	20.5574	5.6201
hypothetical protein] [protein_id=AKB54087.1	1039	hypothetical protein	AKB54087.1	56.9196	8.61073	49.8653	6.05382	31.3647	5.66386	44.4	14.4663	60.2705	23.9943	53.8563	8.39414	43.2182	11.7813	36.7305	12.8535
Oligopeptide ABC transporter, periplasmic oligopeptide-binding protein OppA] [protein_id=AKB54088.1	1040	Oligopeptide ABC transporter, periplasmic oligopeptide-binding protein OppA	AKB54088.1	135.973	25.416	135.445	35.7288	82.4082	12.0068	96.271	5.29653	138.512	31.7614	103.766	10.6851	111.293	4.14166	85.8061	22.9466
Methyltransferase] [protein_id=AKB54089.1	1041	Methyltransferase	AKB54089.1	64.1025	6.93458	89.5813	33.4968	39.5748	2.92351	54.3467	9.53587	71.8862	9.20676	60.6011	9.53683	59.9081	21.3294	55.6683	17.4145
Oligopeptide transport system permease protein OppB] [protein_id=AKB54090.1	1042	Oligopeptide transport system permease protein OppB	AKB54090.1	63.7438	26.3191	85.6653	2.37414	52.7959	6.92654	49.4174	10.3901	63.0809	19.8418	74.542	9.27714	49.1769	23.3293	32.9959	9.08017
Dipeptide transport system permease protein DppC] [protein_id=AKB54091.1	1043	Dipeptide transport system permease protein DppC	AKB54091.1	12.5115	5.83829	8.36399	5.44894	9.54519	6.54709	6.88983	4.57007	5.53496	2.331	8.58351	4.23695	8.54496	5.14581	8.65861	6.16622
ABC transporter, ATP-binding protein] [protein_id=AKB54092.1	1044	ABC transporter, ATP-binding protein	AKB54092.1	1.04372	1.80777	1.04177	0.983517	0.297198	0.514762	0.823575	0.936999	0	0	0.390361	0.676124	0.334726	0.579762	0.876452	0.820083
O-methyltransferase] [protein_id=AKB54093.1	1045	O-methyltransferase	AKB54093.1	24.7446	8.60412	27.342	6.41871	20.0363	11.2178	23.5782	10.481	22.1299	5.00557	35.0837	8.04767	26.5908	13.5196	24.9599	8.04552
Dipeptide transport ATP-binding protein DppD] [protein_id=AKB54094.1	1046	Dipeptide transport ATP-binding protein DppD	AKB54094.1	40.016	16.8524	25.1941	6.21684	28.1712	7.93156	28.6119	7.27817	22.8733	4.29899	30.0741	6.59327	31.9527	3.05281	29.7382	7.53828
Chitin binding protein] [protein_id=AKB54095.1	1047	Chitin binding protein	AKB54095.1	119.28	22.9025	95.8381	33.0807	102.943	35.8249	131.114	8.28452	199.744	32.0227	127.477	9.49418	130.222	12.6024	148.317	32.8352
Matrixin] [protein_id=AKB54096.1	1048	Matrixin	AKB54096.1	9.76269	6.65604	5.01044	4.39242	4.17273	1.85888	2.79495	0.961713	5.15482	4.49297	5.30138	2.69143	8.6045	6.76384	7.34211	7.67628
hypothetical protein] [protein_id=AKB54097.1	1049	hypothetical protein	AKB54097.1	4.51166	2.71278	3.87258	1.95248	4.92095	1.32545	6.69889	2.43867	4.54241	4.67887	3.51556	0.553623	3.72464	1.35234	4.32105	2.77908
hypothetical protein] [protein_id=AKB54098.1	1050	hypothetical protein	AKB54098.1	8.34335	2.5932	2.60264	2.98135	4.38531	2.83234	8.8105	5.38667	2.92561	1.42956	7.40919	1.99488	6.39495	2.23611	2.88585	1.99887
Arylsulfatase] [protein_id=AKB54099.1	1051	Arylsulfatase	AKB54099.1	8.06351	1.71667	6.28207	4.59714	20.204	4.80105	10.1915	4.16222	15.1749	7.46495	8.15389	2.05877	9.25644	3.07797	11.3811	8.18659
Arylsulfatase] [protein_id=AKB54100.1	1052	Arylsulfatase	AKB54100.1	7.36116	5.76847	6.31483	3.73792	12.2842	1.35219	14.5214	7.9243	11.2353	4.15199	8.7933	6.50192	10.9984	4.69141	9.22001	6.55458
Putative arylsulfatase regulatory protein] [protein_id=AKB54101.1	1053	Putative arylsulfatase regulatory protein	AKB54101.1	10.9676	3.54927	14.0951	7.85304	16.8572	3.6556	26.7471	2.37853	20.2848	4.9852	13.9556	2.05857	17.6748	2.68329	15.1833	4.02294
Arylsulfatase] [protein_id=AKB54102.1	1054	Arylsulfatase	AKB54102.1	15.871	2.44136	20.4073	0.178757	21.4287	4.91543	22.2553	6.48077	18.618	7.74018	13.7782	7.99108	24.2653	9.93882	20.1578	1.01743
putative membrane protein] [protein_id=AKB54103.1	1055	putative membrane protein	AKB54103.1	2.57885	3.88328	5.33731	2.6633	7.58431	1.9923	4.03946	1.96976	3.8067	1.75212	4.97942	2.83031	3.23133	2.42373	5.19855	3.71842
Cytochrome c-type biogenesis protein] [protein_id=AKB54104.1	1056	Cytochrome c-type biogenesis protein	AKB54104.1	87.9576	7.40903	77.1321	12.4194	66.372	6.28463	55.3785	11.2927	50.8892	7.1016	69.687	16.6679	59.2626	6.4626	59.3597	2.0775
Biosynthetic Aromatic amino acid aminotransferase alpha / Aspartate aminotransferase] [protein_id=AKB54105.1	1057	Biosynthetic Aromatic amino acid aminotransferase alpha / Aspartate aminotransferase	AKB54105.1	118.055	7.06519	112.359	11.26	120.385	6.98814	114.396	7.50915	152.177	10.3789	115.083	10.9934	153.483	32.4575	154.556	34.7649
6-phospho-3-hexuloisomerase] [protein_id=AKB54106.1	1058	6-phospho-3-hexuloisomerase	AKB54106.1	124.905	15.4239	156.317	20.5275	164.732	24.5996	174.165	33.5339	169.847	27.7571	180.569	3.09202	198.428	27.7344	197.931	46.4506
hypothetical protein] [protein_id=AKB54107.1	1059	hypothetical protein	AKB54107.1	125.33	15.1752	205.457	37.6548	158.479	35.8836	181.357	32.2462	158.159	18.174	207.185	33.9551	162.828	26.3409	171.905	33.1481
hypothetical protein] [protein_id=AKB54108.1	1060	hypothetical protein	AKB54108.1	90.5593	21.0188	108.023	24.8983	95.4311	33.3675	95.4245	5.75556	116.027	7.18374	102.469	27.0829	101.214	17.021	101.367	15.647
GTPase Era] [protein_id=AKB54109.1	1061	GTPase Era	AKB54109.1	135.436	38.92	182.473	55.6374	146.613	14.0658	151.734	21.3994	196.27	24.6022	145.151	26.283	189.295	42.7686	181.965	42.0489
transcriptional regulator PhoU] [protein_id=AKB54110.1	1062	transcriptional regulator PhoU	AKB54110.1	38.6282	1.01032	53.4135	14.5825	33.243	15.2078	31.7771	5.02383	46.3785	3.61645	42.227	4.55424	41.9977	8.01918	46.6424	1.64863
Shikimate kinase II] [protein_id=AKB54111.1	1063	Shikimate kinase II	AKB54111.1	81.5596	4.2763	84.791	13.9906	61.1244	6.30083	79.0247	6.98211	95.434	1.92331	82.9695	21.8876	75.3615	6.93803	63.4414	22.6998
Chorismate mutase I] [protein_id=AKB54112.1	1064	Chorismate mutase I	AKB54112.1	16.7976	6.18081	20.473	10.162	15.1099	4.28649	14.8127	9.42543	19.9356	4.21603	20.9565	6.98603	20.0123	7.7381	18.1245	3.5228
Phosphoribosylaminoimidazole carboxylase catalytic subunit] [protein_id=AKB54113.1	1065	Phosphoribosylaminoimidazole carboxylase catalytic subunit	AKB54113.1	82.7329	28.8849	94.9363	12.2615	115.724	12.535	74.2395	14.0026	124.583	5.18525	85.6569	20.7142	108.139	10.8263	115.15	5.10087
Type I restriction-modification system, restriction subunit R] [protein_id=AKB54114.1	1066	Type I restriction-modification system, restriction subunit R	AKB54114.1	55.118	4.02866	59.9532	2.73311	69.3175	7.91871	70.0995	21.0219	71.8491	3.32846	58.0682	2.03917	70.5732	12.1393	72.7071	20.2065
hypothetical protein] [protein_id=AKB54115.1	1067	hypothetical protein	AKB54115.1	40.8482	7.84933	52.4995	9.17591	39.3064	10.7206	41.6896	15.2604	63.4353	9.52293	52.9857	5.49414	59.1779	10.33	66.0057	1.97804
Type I restriction-modification system, specificity subunit S] [protein_id=AKB54116.1	1068	Type I restriction-modification system, specificity subunit S	AKB54116.1	32.1225	10.8798	38.8268	5.49652	31.2885	4.71043	34.1931	13.0589	30.3141	3.93283	45.8547	1.46032	28.9992	17.0622	25.3718	10.9076
Type I restriction-modification system, DNA-methyltransferase subunit M] [protein_id=AKB54117.1	1069	Type I restriction-modification system, DNA-methyltransferase subunit M	AKB54117.1	40.4062	11.4181	47.2608	20.4413	35.9108	5.45067	33.2971	7.43552	43.9032	5.67848	40.6277	12.8124	48.4491	6.51085	55.3271	13.5543
hypothetical protein] [protein_id=AKB54118.1	1070	hypothetical protein	AKB54118.1	0	0	0	0	0	0	1.03281	0.941461	0.803151	1.00046	0	0	0	0	0.866867	1.50146
Phosphoenolpyruvate carboxylase, archaeal] [protein_id=AKB54119.1	1071	Phosphoenolpyruvate carboxylase, archaeal	AKB54119.1	95.2694	24.9014	73.2032	14.5317	50.495	4.4325	58.3018	11.3225	121.466	4.57713	64.0332	16.9446	81.0293	2.1436	92.6408	18.1154
hypothetical protein] [protein_id=AKB54120.1	1072	hypothetical protein	AKB54120.1	25.6515	8.2034	10.0245	3.20977	8.77908	3.28895	14.1694	2.98959	9.07749	3.59783	8.94923	2.21725	11.2172	0.253705	8.60008	3.93328
hypothetical protein] [protein_id=AKB54121.1	1073	hypothetical protein	AKB54121.1	46.9866	6.26982	61.8428	6.39277	33.7223	14.3283	49.3236	23.0111	51.3642	4.51576	47.7267	8.01507	43.1474	4.89953	43.5458	5.64161
hypothetical protein] [protein_id=AKB54122.1	1074	hypothetical protein	AKB54122.1	15.673	12.9755	21.1555	5.37484	21.1141	0.935406	16.426	6.3241	12.264	4.32432	16.43	5.32888	18.8883	2.0427	11.3066	5.11427
hypothetical protein] [protein_id=AKB54123.1	1075	hypothetical protein	AKB54123.1	121.51	13.7771	127.627	19.9997	71.489	20.6923	103.026	37.1439	105.529	11.8543	108.029	4.64646	93.576	9.64979	83.9317	7.44999
Transcriptional regulator, ArsR family] [protein_id=AKB54124.1	1076	Transcriptional regulator, ArsR family	AKB54124.1	40.0923	13.332	41.8883	5.30173	31.0401	7.32848	26.942	13.3707	21.3907	3.86045	37.6479	8.04237	24.5643	9.67359	16.1162	1.02937
hypothetical protein] [protein_id=AKB54125.1	1077	hypothetical protein	AKB54125.1	49.6598	24.9064	37.7237	2.87174	36.1428	7.32429	42.0633	9.43199	43.0896	4.4855	46.6615	10.0674	36.6647	10.9404	29.8195	4.02409
Cell surface protein] [protein_id=AKB54126.1	1078	Cell surface protein	AKB54126.1	14.317	5.16445	13.0172	4.60872	13.1967	5.31397	16.0453	6.20704	10.8836	5.21418	12.8944	2.80494	11.2779	3.55735	15.6223	3.73552
Mobile element protein] [protein_id=AKB54127.1	1079	Mobile element protein	AKB54127.1	23.3231	11.816	20.6635	9.58562	26.7912	10.2414	20.1246	7.49223	12.6568	2.80976	19.5351	7.2263	10.7019	5.78172	15.1311	3.60709
Mobile element protein] [protein_id=AKB54128.1	1080	Mobile element protein	AKB54128.1	19.5782	5.90681	13.9942	9.2742	24.2145	5.03237	26.7483	1.53064	12.3067	6.57887	15.8175	7.8586	18.3824	5.96099	30.1532	8.67047
cell surface protein] [protein_id=AKB54129.1	1081	cell surface protein	AKB54129.1	17.2477	7.87098	7.45385	1.16176	12.4888	4.98378	10.6246	1.66302	13.1177	2.21914	9.9443	2.78074	9.31472	2.06931	7.38891	4.36682
putative aminopeptidase] [protein_id=AKB54130.1	1082	putative aminopeptidase	AKB54130.1	28.3919	7.81322	20.3726	5.01056	26.5911	1.48714	19.7109	2.33572	17.6267	1.98643	23.064	7.18487	16.2343	11.7918	18.7731	7.76933
hypothetical protein] [protein_id=AKB54131.1	1083	hypothetical protein	AKB54131.1	10.3247	8.28349	4.65418	1.62215	5.36302	4.08978	4.7651	2.07354	2.62482	1.30308	4.60687	4.0618	7.85984	1.09612	5.48063	3.71521
Hypothetical protein] [protein_id=AKB54132.1	1084	Hypothetical protein	AKB54132.1	0	0	0.0975902	0.169031	1.27692	1.35173	0.209231	0.3624	0.644377	0.558066	0.41955	0.495263	0.352283	0.610171	0.4635	0.418202
hypothetical protein] [protein_id=AKB54133.1	1085	hypothetical protein	AKB54133.1	26.3326	12.8333	27.2452	11.265	16.9095	3.38745	28.8829	4.75678	31.1463	6.53255	21.1518	6.83252	24.0497	2.92556	19.5549	4.74842
SSU ribosomal protein S6e] [protein_id=AKB54134.1	1086	SSU ribosomal protein S6e	AKB54134.1	212.686	16.4243	210.868	30.0108	212.952	24.5276	302.178	23.765	189.052	40.1844	215.882	18.1664	182.005	31.7862	199.948	47.0674
Translation initiation factor 2] [protein_id=AKB54135.1	1087	Translation initiation factor 2	AKB54135.1	755.656	92.6231	1060.64	100.639	1126.91	15.5523	1129.1	108.347	1095.61	58.5758	1025.12	12.8031	1044.47	46.1997	1150.62	136.168
Nucleoside diphosphate kinase] [protein_id=AKB54136.1	1088	Nucleoside diphosphate kinase	AKB54136.1	703.341	247.534	662.049	82.5862	641.066	62.1108	611.222	63.8749	944.067	52.0615	617.286	41.0657	898.581	209.386	860.292	116.778
LSU ribosomal protein L24e] [protein_id=AKB54137.1	1089	LSU ribosomal protein L24e	AKB54137.1	268.151	107.546	340.786	44.1688	332.393	7.18499	302.761	41.7452	406.726	41.8085	312.204	19.3665	368.884	42.3684	383.634	6.23532
SSU ribosomal protein S28e] [protein_id=AKB54138.1	1090	SSU ribosomal protein S28e	AKB54138.1	213.723	65.6792	280.798	66.4827	280.106	46.2822	267.84	41.3878	297.051	46.1727	252.36	38.671	305.017	19.7853	279.701	26.2996
LSU ribosomal protein L7Ae] [protein_id=AKB54139.1	1091	LSU ribosomal protein L7Ae	AKB54139.1	543.656	133.065	602.543	17.6433	572.766	42.6822	545.181	32.1052	621.61	111.762	582.324	31.104	710.919	139.299	609.078	98.0453
radical SAM domain protein] [protein_id=AKB54140.1	1092	radical SAM domain protein	AKB54140.1	26.0177	7.10496	13.7345	2.54487	21.1071	4.99193	22.5446	5.36388	18.5869	5.25734	20.6547	6.74301	26.7732	4.71808	25.7843	6.31603
hypothetical protein] [protein_id=AKB54141.1	1093	hypothetical protein	AKB54141.1	11.7259	7.67065	7.32303	0.485083	12.5928	9.37965	15.1372	9.54578	7.12779	2.6646	6.61385	1.58809	7.90496	3.73662	7.88116	4.29656
hypothetical protein] [protein_id=AKB54142.1	1094	hypothetical protein	AKB54142.1	171.301	34.405	149.874	35.5817	123.3	20.7957	73.0225	37.0897	119.085	26.1269	158.541	26.4486	210.977	62.2972	176.089	83.775
transporter, LysE family] [protein_id=AKB54143.1	1095	transporter, LysE family	AKB54143.1	12.7833	1.5548	6.89852	3.59905	11.311	4.89301	9.51684	2.28854	6.60247	2.50414	13.5821	3.27038	12.1461	3.74506	6.81685	2.08076
multidrug ABC transporter, permease protein] [protein_id=AKB54144.1	1096	multidrug ABC transporter, permease protein	AKB54144.1	40.8926	17.2889	43.389	11.7608	47.6598	7.86043	41.2989	7.75165	43.0304	11.6857	51.3326	11.5967	43.3862	2.78898	47.4358	8.4022
ABC transporter, ATP-binding protein] [protein_id=AKB54145.1	1097	ABC transporter, ATP-binding protein	AKB54145.1	41.88	8.93226	46.2519	6.37401	55.9367	13.1288	43.0234	10.1215	53.8984	8.8358	42.5995	4.56519	54.0229	14.4335	50.7448	9.24321
tRNA (guanine(37)-N1)-methyltransferase Trm5b] [protein_id=AKB54146.1	1098	tRNA (guanine(37)-N1)-methyltransferase Trm5b	AKB54146.1	15.1078	3.40706	16.3402	3.33763	12.8194	0.480827	14.1355	3.02188	14.4737	3.00348	19.698	6.2347	15.2069	6.3659	15.9198	2.84612
Dihydrolipoamide dehydrogenase] [protein_id=AKB54147.1	1099	Dihydrolipoamide dehydrogenase	AKB54147.1	127.35	28.2851	114.435	5.43732	137.206	23.0873	134.594	21.3983	124.694	19.449	115.601	4.43608	108.552	6.17582	105.302	9.53046
hypothetical protein] [protein_id=AKB54148.1	1100	hypothetical protein	AKB54148.1	113.568	34.0123	110.951	8.09959	116.419	17.0322	115.703	6.80013	85.3084	18.5349	131.065	13.993	93.6756	42.2451	92.1741	11.8386
ThiJ/PfpI family protein] [protein_id=AKB54149.1	1101	ThiJ/PfpI family protein	AKB54149.1	34.9862	17.9549	60.6716	12.7135	47.0166	4.21277	55.6902	13.2575	45.772	8.03876	49.1249	8.7211	52.6802	13.7765	56.1701	12.2031
hypothetical protein] [protein_id=AKB54150.1	1102	hypothetical protein	AKB54150.1	77.2883	7.75847	92.043	9.91248	81.6206	15.0382	88.52	7.42201	83.6791	16.9425	80.1954	10.8994	65.8343	20.0744	78.7655	29.3506
Glutamine amidotransferase class-I] [protein_id=AKB54151.1	1103	Glutamine amidotransferase class-I	AKB54151.1	28.8131	2.94947	17.8651	8.83321	25.008	7.60851	8.56739	0.567158	20.0514	1.42433	22.8318	5.36109	17.4121	10.7501	20.4345	3.89921
Ancient conserved domain protein 4] [protein_id=AKB54152.1	1104	Ancient conserved domain protein 4	AKB54152.1	83.617	5.27994	64.9021	13.3805	78.9677	11.6852	78.744	6.5051	85.1589	10.6807	96.0724	24.4102	88.4221	11.3879	89.878	19.9218
hypothetical protein] [protein_id=AKB54153.1	1105	hypothetical protein	AKB54153.1	4947.69	695.583	4464.8	646.215	4614.75	115.552	4570.89	612.678	3421.53	247.198	4552.04	380.041	3928.08	387.695	4611.54	651.219
hypothetical protein] [protein_id=AKB54154.1	1106	hypothetical protein	AKB54154.1	27.6892	12.482	31.5712	2.45989	28.8447	15.7466	31.9594	9.84626	43.0738	17.4262	30.5954	7.19867	33.7148	4.09262	30.5092	7.01207
hypothetical protein] [protein_id=AKB54155.1	1107	hypothetical protein	AKB54155.1	65.4144	12.1816	81.6959	9.25274	72.5623	10.3149	77.3006	21.7518	59.2305	8.99943	87.6475	3.16502	78.6894	11.9472	74.1646	5.97655
putative transport protein] [protein_id=AKB54156.1	1108	putative transport protein	AKB54156.1	57.0997	10.4955	59.0755	4.69326	65.8397	3.83964	73.8835	6.87958	68.4712	24.2165	47.2524	6.19431	70.6653	24.776	86.8671	11.0565
Iron-sulfur flavoprotein] [protein_id=AKB54157.1	1109	Iron-sulfur flavoprotein	AKB54157.1	44.7058	9.73309	25.8751	5.7534	30.609	7.97393	37.6731	11.4933	25.4156	1.54853	35.9082	4.81911	28.1886	10.4717	32.6819	10.9067
hypothetical protein] [protein_id=AKB54158.1	1110	hypothetical protein	AKB54158.1	144.734	35.3988	131.081	37.7399	109.22	17.1981	106.313	20.9413	176.438	28.4791	120.277	29.0337	138.829	7.6612	126.919	29.0872
hypothetical protein] [protein_id=AKB54159.1	1111	hypothetical protein	AKB54159.1	38.5108	9.1088	35.7076	8.48857	35.8212	8.1972	30.7151	7.57441	32.6397	6.89761	26.0031	2.79562	45.2441	16.0196	37.0132	12.0216
hypothetical protein] [protein_id=AKB54160.1	1112	hypothetical protein	AKB54160.1	129.221	30.8986	149.005	22.6176	128.545	15.7638	131.534	44.5113	87.7899	12.2815	154.653	6.20803	144.272	22.3414	163.014	46.9666
hypothetical protein] [protein_id=AKB54161.1	1113	hypothetical protein	AKB54161.1	13.9463	4.57414	10.9035	4.26462	9.46655	1.07478	6.60813	1.85166	6.70317	0.569346	9.18043	2.18792	8.02094	0.616864	10.6957	4.81313
Pentapeptide repeat family protein] [protein_id=AKB54162.1	1114	Pentapeptide repeat family protein	AKB54162.1	37.1217	11.5473	24.147	13.3895	57.2046	10.5763	71.2205	11.3569	20.6089	7.66596	33.3014	7.4528	17.5952	6.41615	26.269	14.7536
cell surface protein] [protein_id=AKB54163.1	1115	cell surface protein	AKB54163.1	79.1664	17.1119	78.8579	17.6719	75.4815	7.34546	98.7536	26.8446	79.273	13.8003	72.6375	4.21319	86.3945	26.499	68.0806	9.05458
cell surface protein] [protein_id=AKB54164.1	1116	cell surface protein	AKB54164.1	36.3439	16.3586	52.2072	2.80172	39.042	11.971	44.4299	3.89293	37.7988	13.2771	33.4067	14.0958	40.1705	15.8166	36.8967	9.77848
hypothetical protein] [protein_id=AKB54165.1	1117	hypothetical protein	AKB54165.1	14.7412	9.68108	10.3834	2.05557	9.01952	1.63644	8.83226	9.11352	12.4413	2.09469	10.9361	6.86753	9.66638	4.21883	6.46671	4.99115
NADH oxidase] [protein_id=AKB54166.1	1118	NADH oxidase	AKB54166.1	62.7862	13.7345	38.6021	16.6692	51.2368	19.9446	44.3938	11.5984	38.9595	9.66869	58.1454	12.7743	51.5651	18.5099	36.9509	5.24231
Chemotaxis regulator - transmits chemoreceptor signals to flagelllar motor components CheY] [protein_id=AKB54167.1	1119	Chemotaxis regulator - transmits chemoreceptor signals to flagelllar motor components CheY	AKB54167.1	1.3466	1.25156	1.85543	1.61367	2.09283	1.87101	1.04616	1.812	2.95765	1.81566	1.84191	0.841546	3.01505	3.47674	2.34308	4.05833
Hydroxyethylthiazole kinase] [protein_id=AKB54168.1	1120	Hydroxyethylthiazole kinase	AKB54168.1	90.494	16.9324	96.9894	10.1348	62.0673	13.4348	79.7073	26.1226	93.2242	5.29616	94.7311	8.37328	83.4954	37.5568	65.5602	22.6539
Thiamin-phosphate pyrophosphorylase] [protein_id=AKB54169.1	1121	Thiamin-phosphate pyrophosphorylase	AKB54169.1	40.4523	0.937111	38.2747	9.07184	45.5616	4.09372	44.1443	6.75216	43.8922	10.9172	44.3639	2.72877	47.8887	10.717	44.318	14.4459
hypothetical protein] [protein_id=AKB54170.1	1122	hypothetical protein	AKB54170.1	4.26225	1.20635	8.91857	4.35224	4.95879	1.67598	5.54615	5.58947	6.08773	1.89528	8.85751	7.0439	3.08527	2.16351	5.95846	5.60764
hypothetical protein] [protein_id=AKB54171.1	1123	hypothetical protein	AKB54171.1	10.4828	7.17361	2.63615	2.50165	5.78716	1.91851	4.9234	4.35951	4.69687	1.4271	5.19149	1.47421	4.36149	0.603615	6.04362	4.90194
hypothetical protein] [protein_id=AKB54172.1	1124	hypothetical protein	AKB54172.1	23.8124	4.3791	27.1159	12.7157	21.9718	3.96853	11.695	3.49511	29.035	12.733	26.2051	0.389535	22.4249	7.09076	21.5159	6.85514
hypothetical protein] [protein_id=AKB54173.1	1125	hypothetical protein	AKB54173.1	245.035	19.5248	241.047	97.2456	298.191	35.7484	313.346	52.4071	343.761	24.2284	181.908	22.2716	283.409	90.9884	329.747	10.1791
hypothetical protein] [protein_id=AKB54174.1	1126	hypothetical protein	AKB54174.1	409.048	9.14334	341.234	41.4716	445.255	69.635	367.28	52.0048	494.944	106.894	301.2	24.8052	416.446	126.86	419.627	52.699
transcriptional regulator] [protein_id=AKB54175.1	1127	transcriptional regulator	AKB54175.1	120.776	34.5761	74.3024	12.012	140.907	21.1485	118.711	11.3044	102.117	17.906	79.0531	21.8868	101.972	23.8397	113.871	29.0186
hypothetical protein] [protein_id=AKB54176.1	1128	hypothetical protein	AKB54176.1	7.18493	6.71701	5.40353	1.70913	13.2042	9.79181	4.23287	1.38376	14.7001	8.13388	5.03005	4.08718	11.1206	7.99684	17.6195	8.22136
hypothetical protein] [protein_id=AKB54177.1	1129	hypothetical protein	AKB54177.1	221.485	26.451	165.506	28.8194	234.127	11.2337	166.486	36.7134	248.782	13.0495	148.381	8.43622	191.855	35.9365	201.776	10.153
hypothetical protein] [protein_id=AKB54178.1	1130	hypothetical protein	AKB54178.1	22.705	13.2045	12.5314	5.12875	16.5431	2.33666	18.5596	10.8073	18.1522	4.06769	11.0963	4.03352	14.7506	1.49084	14.8252	7.20697
hypothetical protein] [protein_id=AKB54179.1	1131	hypothetical protein	AKB54179.1	64.7397	17.6096	71.2162	19.632	71.3749	27.7952	66.1916	13.4001	84.501	4.69434	58.2297	7.40218	61.9579	6.53702	62.1423	2.988
Carbonic anhydrase] [protein_id=AKB54180.1	1132	Carbonic anhydrase	AKB54180.1	109.737	9.47173	143.742	35.4595	112.518	2.77847	132.496	9.09733	105.354	21.4948	104.608	1.71869	116.147	8.40924	154.62	28.8067
Periplasmic component of the Tol biopolymer transport system-like protein precursor] [protein_id=AKB54181.1	1133	Periplasmic component of the Tol biopolymer transport system-like protein precursor	AKB54181.1	259.704	31.875	386.5	66.5949	194.418	50.0651	318.864	17.0206	316.226	46.1765	326.966	19.9134	287.724	63.3163	271.198	58.6486
Nicotinate phosphoribosyltransferase] [protein_id=AKB54182.1	1134	Nicotinate phosphoribosyltransferase	AKB54182.1	51.9809	7.4643	56.6323	5.43046	52.7446	4.48019	31.3054	2.30298	57.3799	10.6931	64.7833	7.53621	53.4142	13.897	52.6307	17.4399
Methionine gamma-lyase] [protein_id=AKB54183.1	1135	Methionine gamma-lyase	AKB54183.1	27.6588	13.2196	24.6358	6.15889	22.2471	6.38723	16.7371	5.57654	28.3291	8.18058	23.1337	5.14448	15.9993	5.02821	16.0943	4.43446
ThiJ/PfpI family protein] [protein_id=AKB54184.1	1136	ThiJ/PfpI family protein	AKB54184.1	32.5985	11.5985	28.7382	6.11535	32.7183	10.2263	58.6545	13.3642	22.9905	5.61218	37.7779	7.36759	31.1285	12.916	30.0409	5.16974
hypothetical protein] [protein_id=AKB54185.1	1137	hypothetical protein	AKB54185.1	4.88033	5.97496	5.04459	1.56816	3.59925	2.6675	3.21095	2.08909	4.75327	3.42048	1.78581	2.30774	2.97684	4.31571	3.46482	2.79306
hypothetical protein] [protein_id=AKB54186.1	1138	hypothetical protein	AKB54186.1	1.56311	0.831807	1.52914	1.36753	1.07479	1.86159	0.418463	0.724799	3.01263	2.07744	2.48128	0.491072	1.8222	0.958705	1.14731	1.22517
hypothetical protein] [protein_id=AKB54187.1	1139	hypothetical protein	AKB54187.1	2.12939	1.97962	4.84878	1.90139	5.93054	4.52076	8.85033	3.96322	2.30708	2.04027	4.80432	3.32421	4.95071	2.48091	3.49517	2.20075
Serine/threonine protein kinase] [protein_id=AKB54188.1	1140	Serine/threonine protein kinase	AKB54188.1	102.837	10.7707	100.705	11.6932	120.994	28.2719	103.882	15.0551	111.73	15.3196	96.4795	13.5556	112.475	26.3827	118.883	20.0268
hypothetical protein] [protein_id=AKB54189.1	1141	hypothetical protein	AKB54189.1	15.3887	4.56433	22.6229	6.15686	22.2307	6.70789	17.7783	2.74401	21.6868	6.63578	27.2038	13.0188	22.9471	11.4214	17.695	12.8468
hypothetical protein] [protein_id=AKB54190.1	1142	hypothetical protein	AKB54190.1	11043.6	6890.9	13806.2	4488.89	26370.8	8435.89	25667	2566.78	16588.6	3014.69	13320.7	4708.43	30267.7	18126.5	35523.7	6332.69
Hemolysins and related protein containing CBS domains] [protein_id=AKB54191.1	1143	Hemolysins and related protein containing CBS domains	AKB54191.1	27.6336	5.64633	26.069	8.83384	35.0247	2.80907	27.3352	14.8438	39.5781	10.0168	25.4873	3.92407	27.2283	2.91126	25.7875	4.31813
Zn-dependent protease] [protein_id=AKB54192.1	1144	Zn-dependent protease	AKB54192.1	2.14337	1.85811	1.75726	0.703153	2.69121	0.904387	4.33946	4.65267	1.27799	1.24007	2.06401	0.240986	2.01338	0.0978921	4.41949	3.91649
Translation elongation factor 1 beta subunit] [protein_id=AKB54193.1	1145	Translation elongation factor 1 beta subunit	AKB54193.1	126.043	9.92873	114.219	23.0838	85.0402	10.9965	78.5687	5.87801	135.117	23.4359	90.1981	8.4373	139.253	36.5041	148.043	18.7466
putative Zn-ribbon RNA-binding protein with a function in translation] [protein_id=AKB54194.1	1146	putative Zn-ribbon RNA-binding protein with a function in translation	AKB54194.1	59.585	22.9785	65.8504	16.1906	61.8846	19.5422	53.1798	0.385859	76.5579	37.5236	61.9577	11.8095	94.8941	37.505	87.8496	38.7706
delta 1-pyrroline-5-carboxylate synthetase] [protein_id=AKB54195.1	1147	delta 1-pyrroline-5-carboxylate synthetase	AKB54195.1	103.51	8.66265	117.167	12.6378	127.124	16.7266	97.1911	8.85104	109.496	30.4967	121.566	10.249	143.111	28.5707	154.646	21.4243
putative H4MPT-linked C1 transfer pathway protein] [protein_id=AKB54196.1	1148	putative H4MPT-linked C1 transfer pathway protein	AKB54196.1	365.708	97.6907	386.402	6.4903	397.156	42.4008	473.087	70.9182	426.363	49.2828	445.85	47.5237	531.424	62.6413	525.532	46.7936
COG1821 family protein] [protein_id=AKB54197.1	1149	COG1821 family protein	AKB54197.1	280.653	139.889	320.343	55.2273	350.004	47.1968	325.007	72.577	335.918	42.1898	313.547	30.2306	451.539	151.156	489.518	35.7789
Heat shock protein] [protein_id=AKB54198.1	1150	Heat shock protein	AKB54198.1	189.026	34.5255	141.337	52.8184	181.346	14.3995	220.827	7.87598	139.221	91.9133	165.266	32.9781	147.491	15.683	151.238	52.6093
Heat shock protein GrpE] [protein_id=AKB54199.1	1151	Heat shock protein GrpE	AKB54199.1	331.22	78.492	241.569	21.988	229.234	44.1035	224.898	22.5414	200.111	38.1575	182.028	33.7121	187.738	29.5672	245.378	77.2023
Chaperone protein DnaK] [protein_id=AKB54200.1	1152	Chaperone protein DnaK	AKB54200.1	965.759	165.74	1075.02	249.336	912.129	32.2748	1031.98	80.279	1477	68.3709	1004.31	159.527	1311.23	141.83	1284.68	138.534
Chaperone protein DnaJ] [protein_id=AKB54201.1	1153	Chaperone protein DnaJ	AKB54201.1	140.243	9.13274	152.428	19.5419	150.673	30.8212	127.411	29.5891	189.328	18.1028	172.326	35.4106	185.204	12.6619	181.133	33.9707
Trk system potassium uptake protein TrkA] [protein_id=AKB54202.1	1154	Trk system potassium uptake protein TrkA	AKB54202.1	137.006	10.467	162.726	36.5724	154.352	25.0041	165.499	18.918	119.655	15.2472	213.046	19.8577	158.833	34.4105	142.801	6.08045
Potassium uptake protein TrkH] [protein_id=AKB54203.1	1155	Potassium uptake protein TrkH	AKB54203.1	39.8318	15.9825	25.1258	2.12807	26.4432	8.82537	32.4752	11.3898	28.5965	12.3202	31.6265	3.98802	34.6236	12.0223	38.5367	8.58603
sulfur oxidation V protein] [protein_id=AKB54204.1	1156	sulfur oxidation V protein	AKB54204.1	7.25588	5.49698	1.69197	2.14086	7.85412	1.43199	4.14581	3.01634	3.82197	2.89802	6.82137	2.41241	5.02345	4.3526	4.24387	4.33717
Transcriptional regulator, ArsR family] [protein_id=AKB54205.1	1157	Transcriptional regulator, ArsR family	AKB54205.1	60.376	27.6566	55.0689	10.341	37.2524	6.00867	43.0318	6.95416	45.9051	3.15461	75.4545	11.3764	44.3603	24.7273	31.5112	3.27823
hypothetical protein] [protein_id=AKB54206.1	1158	hypothetical protein	AKB54206.1	6.73234	5.73447	3.15739	0.66685	5.64826	4.39908	7.242	3.08828	6.0038	1.05369	5.69405	3.02944	4.33141	1.37385	6.68059	3.20479
Huntingtin interacting protein E-like protein] [protein_id=AKB54207.1	1159	Huntingtin interacting protein E-like protein	AKB54207.1	21.4211	5.47663	14.4497	3.27686	31.2457	10.747	23.2846	8.60709	29.72	8.8942	19.4522	2.54143	26.871	5.05276	33.6037	2.93784
sensory transduction histidine kinase] [protein_id=AKB54208.1	1160	sensory transduction histidine kinase	AKB54208.1	17.5694	12.2331	15.686	4.31566	24.9896	2.99809	25.4578	12.1768	14.3761	5.52327	14.5826	4.0599	14.2372	0.165735	16.1715	2.07404
hypothetical protein] [protein_id=AKB54209.1	1161	hypothetical protein	AKB54209.1	3.09825	2.74338	5.56519	2.01614	3.71125	0.913463	7.29495	5.85408	3.67377	0.187362	4.86498	0.950373	6.85006	7.45855	3.53346	3.08456
hypothetical protein] [protein_id=AKB54210.1	1162	hypothetical protein	AKB54210.1	7.69417	7.21591	3.31905	2.06556	6.92468	5.4905	10.1542	4.8815	1.24286	1.07799	3.29119	0.699471	2.72046	2.6456	2.41382	2.13669
nucleotidyltransferase] [protein_id=AKB54211.1	1163	nucleotidyltransferase	AKB54211.1	8.68855	7.52601	6.31477	1.3337	11.2403	4.56584	7.27711	6.47191	2.66144	1.64753	9.46318	4.6651	5.97747	2.38421	6.01594	3.948
hypothetical protein] [protein_id=AKB54212.1	1164	hypothetical protein	AKB54212.1	11.9201	4.58909	11.9467	4.19295	12.7417	3.2811	11.2753	2.77358	7.72466	3.76247	7.00421	1.95071	4.99835	1.93735	7.81462	5.64781
hypothetical protein] [protein_id=AKB54213.1	1165	hypothetical protein	AKB54213.1	13.8504	6.60288	13.3809	9.56717	17.5547	6.01616	7.02536	2.92701	11.2702	1.17014	8.40745	1.02842	8.90416	2.60465	8.0578	5.05619
hypothetical protein] [protein_id=AKB54214.1	1166	hypothetical protein	AKB54214.1	48.6283	14.6878	37.2325	14.83	33.8872	4.2313	43.9118	18.2185	29.778	1.91806	42.3883	8.86087	39.5687	7.00628	31.1021	14.5995
Argininosuccinate synthase] [protein_id=AKB54215.1	1167	Argininosuccinate synthase	AKB54215.1	16.7486	4.54041	7.77834	1.63081	10.9988	3.72527	9.07885	4.60522	12.6613	4.72478	11.2285	5.42344	12.3956	5.22793	9.60639	4.01311
hypothetical protein] [protein_id=AKB54216.1	1168	hypothetical protein	AKB54216.1	13.1362	7.70518	7.51786	3.03301	6.94361	2.29279	5.87879	4.14788	7.6208	3.95225	10.3629	6.305	3.39243	3.19375	2.43191	2.14328
hypothetical protein] [protein_id=AKB54217.1	1169	hypothetical protein	AKB54217.1	38.1522	7.14476	39.0848	10.894	36.315	4.36442	33.8306	12.0011	26.0113	9.92961	45.1465	10.9263	33.4039	17.8662	28.0581	8.66298
hypothetical protein] [protein_id=AKB54218.1	1170	hypothetical protein	AKB54218.1	4.31472	4.13696	3.02744	1.96181	2.14511	1.89473	3.61853	0.81121	1.51779	1.08259	2.67874	0.678218	1.48496	0.829613	1.61454	0.694551
hypothetical protein] [protein_id=AKB54219.1	1171	hypothetical protein	AKB54219.1	34.2016	15.0957	41.6563	12.3394	45.8154	10.844	51.8913	26.5793	30.5828	4.17902	52.878	4.27509	30.5173	15.4569	36.052	9.48128
Argininosuccinate synthase] [protein_id=AKB54220.1	1172	Argininosuccinate synthase	AKB54220.1	155.27	19.2586	132.804	23.5462	95.7493	13.1879	110.046	22.8347	150.031	12.2835	132.67	20.9129	151.07	5.70192	128.259	29.7585
Carbamoyl-phosphate synthase large chain] [protein_id=AKB54221.1	1173	Carbamoyl-phosphate synthase large chain	AKB54221.1	722.617	27.5746	743.39	99.3997	612.033	15.7086	652.761	36.0709	818.143	9.03466	755.424	112.349	905.838	42.2829	859.15	74.6432
Carbamoyl-phosphate synthase small chain] [protein_id=AKB54222.1	1174	Carbamoyl-phosphate synthase small chain	AKB54222.1	234.851	19.2348	204.984	34.078	198.132	27.8992	167.821	35.458	260.811	61.8642	186.185	7.62177	266.88	69.9602	270.183	47.1841
Glycine betaine ABC transport system, ATP-binding protein OpuAA] [protein_id=AKB54223.1	1175	Glycine betaine ABC transport system, ATP-binding protein OpuAA	AKB54223.1	165.096	28.6014	186.706	44.6191	406.278	48.9153	352.452	50.4744	257.021	46.7562	189.284	33.0085	234.985	71.5713	315.847	65.4447
Glycine betaine ABC transport system, permease protein OpuAB] [protein_id=AKB54224.1	1176	Glycine betaine ABC transport system, permease protein OpuAB	AKB54224.1	27.8106	2.2672	28.9697	6.29675	78.3191	7.10937	67.9896	19.3236	47.6886	2.98509	28.3521	1.77498	45.053	15.2553	55.5138	9.93578
Glycine betaine ABC transport system, glycine betaine-binding protein OpuAC] [protein_id=AKB54225.1	1177	Glycine betaine ABC transport system, glycine betaine-binding protein OpuAC	AKB54225.1	13.4863	2.37426	12.8233	3.2729	32.7909	6.83562	12.7036	0.601717	17.2327	1.90699	13.0111	1.68929	17.8127	8.98458	21.3615	9.40933
hypothetical protein] [protein_id=AKB54226.1	1178	hypothetical protein	AKB54226.1	4947.69	695.583	4464.8	646.215	4614.75	115.552	4570.89	612.678	3421.53	247.198	4552.04	380.041	3928.08	387.695	4611.54	651.219
Glycine betaine ABC transport system, glycine betaine-binding protein OpuAC] [protein_id=AKB54227.1	1179	Glycine betaine ABC transport system, glycine betaine-binding protein OpuAC	AKB54227.1	4.48188	4.79324	8.78961	4.26309	11.3991	1.74755	9.34519	6.84111	6.74429	2.77139	5.80622	1.94588	8.18393	4.4249	7.53577	4.8683
GTP cyclohydrolase III (methanopterin)] [protein_id=AKB54228.1	1180	GTP cyclohydrolase III (methanopterin)	AKB54228.1	39.8733	14.3152	39.7099	5.57601	38.0848	2.06265	44.31	13.1425	40.1207	12.1354	33.5322	5.098	28.1905	5.81508	33.8234	9.78349
Putative ankyrin repeat protein] [protein_id=AKB54229.1	1181	Putative ankyrin repeat protein	AKB54229.1	98.0426	29.2149	93.8286	36.4039	102.747	13.0038	99.1699	12.1062	83.98	23.1946	87.9646	38.1708	64.0008	4.12244	84.4467	22.1379
hypothetical protein] [protein_id=AKB54230.1	1182	hypothetical protein	AKB54230.1	51.3968	7.17758	71.4728	8.36616	83.1724	4.16388	108.376	6.75234	78.3416	4.91338	81.3206	17.1882	93.4764	21.5063	96.8421	27.6262
Yip1 domain protein] [protein_id=AKB54231.1	1183	Yip1 domain protein	AKB54231.1	26.6088	4.06331	28.0866	5.03773	12.0268	2.41848	14.6166	8.17348	19.8042	3.09231	25.2606	4.23727	24.7016	3.17885	26.1089	3.7485
hypothetical protein] [protein_id=AKB54232.1	1184	hypothetical protein	AKB54232.1	24.6865	4.85462	20.3413	7.56256	21.3361	10.4158	31.9064	1.32432	19.6407	1.47537	23.7115	3.86394	21.106	11.5791	25.1377	6.97699
Cell division transporter, ATP-binding protein FtsE] [protein_id=AKB54233.1	1185	Cell division transporter, ATP-binding protein FtsE	AKB54233.1	8.85927	5.7323	9.43708	4.60861	8.65711	4.40314	7.95428	1.41209	6.96424	2.88238	12.5724	3.36212	7.68432	6.04511	5.92708	0.208061
Cell division protein FtsX] [protein_id=AKB54234.1	1186	Cell division protein FtsX	AKB54234.1	21.3214	8.27782	11.394	6.2865	11.3528	6.2826	17.2752	4.80047	10.3143	2.96619	13.1849	5.37919	8.43715	9.35301	9.47756	7.41206
4-aminobutyrate aminotransferase] [protein_id=AKB54235.1	1187	4-aminobutyrate aminotransferase	AKB54235.1	35.5418	10.4398	31.9256	8.20269	28.4335	3.49671	36.0948	7.47829	41.0342	4.93013	35.4726	8.66665	27.8269	14.9862	24.4294	4.39273
Aldehyde dehydrogenase] [protein_id=AKB54236.1	1188	Aldehyde dehydrogenase	AKB54236.1	24.6498	8.07423	38.4056	19.5556	49.6526	8.65667	47.1401	9.76515	31.7981	2.09462	29.9564	7.83008	29.1063	4.52959	35.0852	11.6022
Response regulator receiver] [protein_id=AKB54237.1	1189	Response regulator receiver	AKB54237.1	28.513	7.67926	26.5883	8.07335	34.8982	6.31426	30.0307	12.5847	33.4869	3.1785	31.1736	7.57398	34.7171	11.9853	23.6435	7.0827
Glutamyl-tRNA(Gln) amidotransferase transferase subunit] [protein_id=AKB54238.1	1190	Glutamyl-tRNA(Gln) amidotransferase transferase subunit	AKB54238.1	364.621	61.7139	404.804	26.1165	419.524	39.5666	408.236	9.70755	459.063	26.9233	418.417	30.788	518.346	84.4615	502.746	18.3256
hypothetical protein] [protein_id=AKB54239.1	1191	hypothetical protein	AKB54239.1	1.89643	2.08167	1.20402	1.33204	2.22127	1.5887	1.96891	1.11198	0.913126	0.795575	0.878311	1.52128	1.03929	1.05728	0.912637	0.870485
Transcriptional regulator, TetR family] [protein_id=AKB54240.1	1192	Transcriptional regulator, TetR family	AKB54240.1	30.4384	17.2341	45.9591	11.7416	32.3933	14.2328	25.5184	1.86499	23.299	5.8437	34.2336	4.04159	27.899	10.9217	61.3536	22.093
molybdenum cofactor biosynthesis protein A] [protein_id=AKB54241.1	1193	molybdenum cofactor biosynthesis protein A	AKB54241.1	150.173	23.3308	137.979	27.9894	110.808	10.6083	120.43	20.9216	163.24	24.8291	129.697	28.9614	205.593	42.5119	193.901	57.8061
Ferredoxin] [protein_id=AKB54242.1	1194	Ferredoxin	AKB54242.1	38.5402	12.8119	56.0158	23.5561	38.9161	7.28025	33.6454	16.0957	45.4941	7.92987	45.7653	13.0127	57.315	12.3129	51.5829	11.3343
Digeranylgeranylglycerophospholipid reductase] [protein_id=AKB54243.1	1195	Digeranylgeranylglycerophospholipid reductase	AKB54243.1	320.329	36.7902	355.402	51.0389	252.151	43.1297	296.23	69.4212	304.331	23.4304	352.963	49.3498	353.487	20.0528	335.438	16.3452
Potassium uptake protein TrkH] [protein_id=AKB54244.1	1196	Potassium uptake protein TrkH	AKB54244.1	69.8665	23.7818	67.6398	19.6058	57.5739	8.76659	58.6439	1.89437	73.2825	14.0981	71.4574	4.8745	61.227	19.0724	82.3671	13.8319
Trk system potassium uptake protein TrkA] [protein_id=AKB54245.1	1197	Trk system potassium uptake protein TrkA	AKB54245.1	92.6617	15.317	149.786	30.316	143.131	13.5444	149.139	13.8553	150.894	33.8747	110.314	14.6262	138.525	42.0723	145.125	29.3578
Molybdenum ABC transporter, periplasmic molybdenum-binding protein ModA] [protein_id=AKB54246.1	1198	Molybdenum ABC transporter, periplasmic molybdenum-binding protein ModA	AKB54246.1	24.1371	4.28002	21.6436	3.17094	27.4324	2.79687	31.7738	13.2298	16.0554	3.8377	17.9266	6.70481	16.1672	4.33538	17.4391	7.79234
hypothetical protein] [protein_id=AKB54247.1	1199	hypothetical protein	AKB54247.1	1.6355	2.19011	0.846594	1.00293	2.53491	2.47826	0.418463	0.724799	0.815333	0.91486	0.834549	0.982998	3.35229	2.31675	2.00835	3.47857
Serine acetyltransferase] [protein_id=AKB54248.1	1200	Serine acetyltransferase	AKB54248.1	200.532	69.8697	279.401	78.6044	80.827	52.0238	42.5857	15.5052	191.344	87.0603	237.695	54.4836	126.694	149.735	44.5947	4.88435
Cysteine synthase] [protein_id=AKB54249.1	1201	Cysteine synthase	AKB54249.1	582.248	63.3791	869.507	170.516	188.295	125.226	124.04	28.4815	554.083	238.443	677.802	57.8483	326.224	352.954	118.441	20.4455
hypothetical protein] [protein_id=AKB54250.1	1202	hypothetical protein	AKB54250.1	4947.69	695.583	4464.8	646.215	4614.75	115.552	4570.89	612.678	3421.53	247.198	4552.04	380.041	3928.08	387.695	4611.54	651.219
hypothetical protein] [protein_id=AKB54251.1	1203	hypothetical protein	AKB54251.1	44.426	15.0319	51.2931	13.0916	30.3232	2.59213	34.7975	19.78	36.8694	9.38508	41.4517	4.95234	31.845	13.6953	23.6402	11.902
Cysteine desulfurase] [protein_id=AKB54252.1	1204	Cysteine desulfurase	AKB54252.1	1161.72	138.434	927.565	168.018	222.948	159.819	151.257	55.7513	770.603	218.573	962.459	197.565	472.835	550.889	151.478	46.5372
scaffold protein] [protein_id=AKB54253.1	1205	scaffold protein	AKB54253.1	483.727	107.977	498.077	155.737	110.794	78.9767	51.805	9.54959	361.938	74.9824	433.711	96.063	198.353	244.794	59.14	11.4005
Quinolinate synthetase] [protein_id=AKB54254.1	1206	Quinolinate synthetase	AKB54254.1	225.308	78.1376	165.807	30.2076	47.0465	33.3087	24.6513	6.16006	100.164	36.8873	140.278	8.76947	60.5081	76.3535	18.2804	10.8716
O-acetylhomoserine sulfhydrylase] [protein_id=AKB54255.1	1207	O-acetylhomoserine sulfhydrylase	AKB54255.1	1035.79	152.487	1042.75	238.662	291.899	176.068	153.931	28.4304	713.126	148.627	1017.73	210.254	520.495	580.573	211.303	27.5948
Homoserine O-acetyltransferase] [protein_id=AKB54256.1	1208	Homoserine O-acetyltransferase	AKB54256.1	440.146	104.23	417.97	79.8914	130.665	79.2477	66.4364	8.87579	288.967	37.0186	412.444	77.887	190.229	250.539	56.4232	12.3448
Transcriptional regulator, Cro/CI family] [protein_id=AKB54257.1	1209	Transcriptional regulator, Cro/CI family	AKB54257.1	4.0398	3.75469	5.72831	0.788495	4.62774	0.946799	2.16602	0.518593	3.50591	2.08173	5.03552	1.31455	3.7096	1.64161	1.48204	1.30132
hypothetical protein] [protein_id=AKB54258.1	1210	hypothetical protein	AKB54258.1	24.4417	13.2919	13.9945	6.34783	14.0077	2.09359	11.1773	3.36657	11.73	3.92262	16.4651	5.23375	8.88912	3.36115	7.1755	1.87026
hypothetical protein] [protein_id=AKB54259.1	1211	hypothetical protein	AKB54259.1	277.716	16.8614	388.282	133.168	323.52	16.8916	302.255	52.1254	348.602	93.4694	259.719	2.31562	172.544	76.5712	193.486	41.6212
Histidinol dehydrogenase] [protein_id=AKB54260.1	1212	Histidinol dehydrogenase	AKB54260.1	157.58	5.10354	183.4	11.8872	157.061	13.0729	155.997	21.1579	184.615	28.5409	201.819	29.2842	214.751	40.9725	181.027	13.2563
Putative ski2-type helicase] [protein_id=AKB54261.1	1213	Putative ski2-type helicase	AKB54261.1	81.4956	19.6298	127.364	15.023	111.533	24.5374	120.083	16.6611	141.532	14.7863	115.805	8.28197	139.422	28.9	134.208	33.7623
RNase L inhibitor] [protein_id=AKB54262.1	1214	RNase L inhibitor	AKB54262.1	145.773	48.0297	182.968	37.7593	198.557	11.6509	179.36	18.7909	186.652	21.0736	178.018	13.6399	194.872	17.0463	183.741	9.32482
hypothetical protein] [protein_id=AKB54263.1	1215	hypothetical protein	AKB54263.1	22.9199	9.67981	20.5679	11.9334	36.6007	12.5789	31.737	9.96905	21.2851	7.00466	23.6453	9.10017	19.4017	8.45551	31.45	10.0661
hypothetical protein] [protein_id=AKB54264.1	1216	hypothetical protein	AKB54264.1	24.1818	11.7964	8.43097	2.85354	19.1577	5.88147	19.5486	9.36006	22.9874	6.47307	8.34588	2.80998	15.2558	7.56081	17.744	2.90129
hypothetical protein] [protein_id=AKB54265.1	1217	hypothetical protein	AKB54265.1	2.97652	1.25687	4.65359	1.62045	10.166	1.08277	7.0036	2.43519	6.14581	1.83695	6.54318	1.04399	7.23803	1.28605	5.90421	2.48181
hypothetical protein] [protein_id=AKB54266.1	1218	hypothetical protein	AKB54266.1	45.2898	5.20236	37.3331	4.79171	49.778	9.88365	32.9622	4.74146	56.7339	8.72612	38.8765	6.75315	47.6687	8.09478	51.618	7.42061
putative exonuclease, DNA ligase-associated] [protein_id=AKB54267.1	1219	putative exonuclease, DNA ligase-associated	AKB54267.1	45.406	1.593	49.3408	3.03838	46.9788	4.76339	42.8926	8.67774	54.0561	12.5354	54.6675	11.4162	70.3763	21.4225	70.1523	16.9254
Ribosomal protein S6] [protein_id=AKB54268.1	1220	Ribosomal protein S6	AKB54268.1	485.926	48.6493	615.93	84.2573	430.894	41.7462	475.52	42.8588	510.462	119.455	555.598	24.1624	468.013	96.8855	405.453	71.6053
Thioredoxin] [protein_id=AKB54269.1	1221	Thioredoxin	AKB54269.1	316.944	57.9709	235.298	49.0377	210.043	36.1546	224.998	23.4708	243.097	43.0499	197.053	37.1801	233.195	5.68866	199.522	42.6018
Coenzyme F420:L-glutamate ligase] [protein_id=AKB54270.1	1222	Coenzyme F420:L-glutamate ligase	AKB54270.1	136.928	17.9077	149.233	7.69611	171.09	12.8221	149.425	29.7252	184.415	18.5488	138.089	14.8261	172.796	20.4415	176.699	13.9149
5,10-methylenetetrahydrofolate reductase] [protein_id=AKB54271.1	1223	5,10-methylenetetrahydrofolate reductase	AKB54271.1	163.915	41.8322	128.023	34.1115	133.395	11.1815	132.251	3.71085	132.129	5.1818	126.893	32.6159	128.867	27.0051	110.536	6.3372
Zinc-finger protein] [protein_id=AKB54272.1	1224	Zinc-finger protein	AKB54272.1	89.1622	17.9702	73.884	12.7128	83.6478	12.1444	88.3042	25.3766	65.5991	15.7106	78.904	17.5545	88.0267	13.9846	71.8429	27.6057
dihydropteroate synthase] [protein_id=AKB54273.1	1225	dihydropteroate synthase	AKB54273.1	132.087	24.2779	188.059	16.18	190.879	50.6342	200.409	18.5316	161.837	19.7596	171.487	32.1334	175.7	19.6817	157.068	6.48284
Ribosomal protein S6] [protein_id=AKB54274.1	1226	Ribosomal protein S6	AKB54274.1	32.4667	7.76615	23.5311	5.99908	19.1581	3.74164	23.0875	9.73116	22.2194	5.97927	21.7213	7.1895	20.4535	0.592537	22.4535	4.48652
GTPases - Sulfate adenylate transferase subunit 1] [protein_id=AKB54275.1	1227	GTPases - Sulfate adenylate transferase subunit 1	AKB54275.1	11.0341	1.79856	6.34736	3.05106	6.48212	4.80157	5.68785	1.1546	6.01934	5.46909	5.32146	2.95116	5.88408	2.55973	1.96736	1.7049
Tryptophan synthase beta chain 1] [protein_id=AKB54276.1	1228	Tryptophan synthase beta chain 1	AKB54276.1	212.652	5.18752	177.321	44.9879	128.623	30.4057	129.421	22.9297	177.337	38.0952	170.586	29.8685	169.93	19.5207	133.355	32.9793
Phosphomethylpyrimidine kinase] [protein_id=AKB54277.1	1229	Phosphomethylpyrimidine kinase	AKB54277.1	46.7401	7.96779	58.1632	8.9525	51.9227	3.94872	47.0938	12.9642	59.1878	1.34038	53.3929	4.27393	55.7028	2.72841	59.2149	22.6613
Putative snRNP Sm-like protein] [protein_id=AKB54278.1	1230	Putative snRNP Sm-like protein	AKB54278.1	133.956	32.5931	84.8883	16.2762	92.7451	22.1962	104.222	15.4444	160.003	18.291	94.899	26.0199	95.5938	7.38982	94.3544	14.7725
LSU ribosomal protein L37e] [protein_id=AKB54279.1	1231	LSU ribosomal protein L37e	AKB54279.1	168.4	50.0919	112.679	1.4318	97.429	12.0544	70.7586	3.42494	114.82	11.8232	100.956	19.6766	123.967	19.6139	122.946	24.833
Amidophosphoribosyltransferase] [protein_id=AKB54280.1	1232	Amidophosphoribosyltransferase	AKB54280.1	853.853	145.959	808.422	32.1562	849.88	56.4221	824.932	30.5714	912.234	86.9478	774.075	4.90411	914.658	118.115	923.054	36.3497
secondary thiamine-phosphate synthase enzyme] [protein_id=AKB54281.1	1233	secondary thiamine-phosphate synthase enzyme	AKB54281.1	3.62671	3.71424	2.24643	1.53632	5.53825	0.296274	7.64117	6.58707	2.55147	2.02358	2.86162	1.97559	3.00252	0.957679	2.78368	2.41596
hypothetical protein] [protein_id=AKB54282.1	1234	hypothetical protein	AKB54282.1	22.9199	9.67981	20.5679	11.9334	36.6007	12.5789	31.737	9.96905	21.2851	7.00466	23.6453	9.10017	19.4017	8.45551	31.45	10.0661
hypothetical protein] [protein_id=AKB54283.1	1235	hypothetical protein	AKB54283.1	141.664	43.5018	99.2683	19.1248	118.846	15.4586	104.783	37.6341	88.9045	8.40628	103.822	14.1979	99.9026	5.13655	115.946	18.1412
cell surface protein] [protein_id=AKB54284.1	1236	cell surface protein	AKB54284.1	191.26	44.6414	157.366	24.7198	135.994	36.7443	141.449	4.21864	186.639	23.9029	158.369	26.3173	191.46	38.4523	159.782	42.1865
Mobile element protein] [protein_id=AKB54285.1	1237	Mobile element protein	AKB54285.1	1.57956	2.06326	0.715777	0.627489	3.35681	2.27852	2.51078	4.34879	0.728308	0.65876	1.99788	1.61916	2.16945	2.47878	2.69695	2.01461
hypothetical protein] [protein_id=AKB54286.1	1238	hypothetical protein	AKB54286.1	3.52635	0.545655	4.0357	1.17574	5.44566	3.956	3.00419	1.29068	3.06453	1.64042	3.36187	1.72343	4.39158	2.55952	5.40718	4.03592
LL-diaminopimelate aminotransferase, methanococcal] [protein_id=AKB54287.1	1239	LL-diaminopimelate aminotransferase, methanococcal	AKB54287.1	194.432	44.6727	210.38	20.5562	182.666	6.26985	219.996	43.1294	246.747	47.4885	216.653	18.7238	287.282	64.4157	248.048	15.166
hypothetical protein] [protein_id=AKB54288.1	1240	hypothetical protein	AKB54288.1	7.82708	3.3557	8.23515	3.02255	7.3125	2.47588	13.2103	1.46336	7.99979	5.45129	11.6795	4.01541	10.5784	4.96858	9.99749	2.64221
Nitroreductase family protein] [protein_id=AKB54289.1	1241	Nitroreductase family protein	AKB54289.1	23.6407	5.14969	15.2971	2.45489	32.1836	10.95	29.7067	9.36515	13.8248	1.21078	22.2116	4.64362	17.3538	8.23924	18.1724	4.59967
hypothetical protein] [protein_id=AKB54290.1	1242	hypothetical protein	AKB54290.1	30.4689	10.6983	47.6887	15.5978	38.7065	7.52188	57.2791	27.8781	35.8292	8.98224	40.437	10.1908	34.5528	6.13365	27.2642	11.7861
Alpha/beta hydrolase] [protein_id=AKB54291.1	1243	Alpha/beta hydrolase	AKB54291.1	28.3706	11.0841	24.7654	7.48597	29.2181	8.89868	20.4365	1.69314	17.5124	3.91704	25.8598	9.10863	22.4136	6.49461	20.5868	6.66625
Ferredoxin] [protein_id=AKB54292.1	1244	Ferredoxin	AKB54292.1	51.9015	7.73683	47.8166	15.3247	43.8769	7.92633	37.1588	4.69555	55.9325	1.2762	43.4013	13.2145	53.6875	2.69392	49.7762	6.32508
Acetyltransferase] [protein_id=AKB54293.1	1245	Acetyltransferase	AKB54293.1	14.9556	5.5589	9.2096	3.10754	11.9786	8.01382	10.956	1.38396	11.0656	4.69832	9.45176	2.62397	5.22275	4.27042	6.54331	3.51572
Transcriptional regulator, AraC family] [protein_id=AKB54294.1	1246	Transcriptional regulator, AraC family	AKB54294.1	23.9992	14.7452	22.945	2.22302	20.5381	7.76411	15.9652	5.30265	16.1837	1.05574	24.3363	0.483243	17.011	8.15971	20.6883	11.0062
Glyoxalase family protein] [protein_id=AKB54295.1	1247	Glyoxalase family protein	AKB54295.1	3.50396	3.31802	5.53411	5.01051	3.64556	3.49615	2.15514	1.92423	2.78959	1.77225	3.84531	3.83624	3.56165	3.86557	2.12381	0.771562
hypothetical protein] [protein_id=AKB54296.1	1248	hypothetical protein	AKB54296.1	131.213	12.9136	81.1004	27.1992	125.532	19.5777	113.833	18.9024	57.1469	21.5429	94.9006	15.1766	90.3021	15.3672	86.1321	10.2476
Cell division protein FtsJ] [protein_id=AKB54297.1	1249	Cell division protein FtsJ	AKB54297.1	135.965	46.3395	121.43	15.8137	164.201	15.7759	131.953	11.8616	108.136	9.52621	152.084	12.6585	140.579	27.0595	144.17	29.8383
hypothetical protein] [protein_id=AKB54298.1	1250	hypothetical protein	AKB54298.1	101.448	25.8748	80.293	10.0181	74.342	12.3287	92.1141	14.9602	93.2633	13.4354	79.5118	8.15685	92.4352	19.6987	91.6686	11.7498
hypothetical protein] [protein_id=AKB54299.1	1251	hypothetical protein	AKB54299.1	178.972	117.872	145.098	4.46097	111.754	12.241	86.8519	7.20827	96.9116	44.8635	141.094	12.0768	105.063	39.5286	91.6803	16.599
hypothetical protein] [protein_id=AKB54300.1	1252	hypothetical protein	AKB54300.1	31.2562	0.121495	23.3997	5.87021	24.9592	10.7328	25.6149	11.3876	17.8481	0.941608	22.5582	6.98297	15.6294	4.8116	16.495	6.19008
cell surface protein] [protein_id=AKB54301.1	1253	cell surface protein	AKB54301.1	31.7455	14.8675	32.0875	10.0839	34.4178	3.84364	39.4841	22.3669	33.899	7.73206	40.1834	7.93155	32.0938	4.85358	40.1949	7.51657
Phosphoenolpyruvate synthase] [protein_id=AKB54302.1	1254	Phosphoenolpyruvate synthase	AKB54302.1	30.9043	9.85829	23.203	7.69168	33.1683	3.7997	31.9368	4.68045	23.6185	3.49933	26.5393	2.62597	22.6336	5.9725	26.2052	3.58893
Trk system potassium uptake protein TrkA] [protein_id=AKB54303.1	1255	Trk system potassium uptake protein TrkA	AKB54303.1	224.252	21.3514	185.574	27.4667	172.936	27.9787	214.695	15.5911	135.235	29.9368	214.378	6.20577	135.849	67.5008	145.395	32.8941
hypothetical protein] [protein_id=AKB54304.1	1256	hypothetical protein	AKB54304.1	910.603	183.03	955.041	134.507	815.151	62.0278	819.611	57.8922	655.64	40.5158	1012.8	83.3021	745.871	277.624	573.436	36.7152
Transposase] [protein_id=AKB54305.1	1257	Transposase	AKB54305.1	235.34	13.3287	144.942	19.0683	154.463	17.3443	172.373	4.98274	161.58	24.3876	145.059	13.821	153.299	10.1314	153.075	8.8934
Alkaline phosphatase] [protein_id=AKB54306.1	1258	Alkaline phosphatase	AKB54306.1	14.8413	2.81812	13.2778	8.1591	23.4778	6.9188	17.8157	6.88115	21.1324	2.52252	9.94334	5.83184	16.0055	10.7289	22.9197	1.60378
Glycosyltransferase] [protein_id=AKB54307.1	1259	Glycosyltransferase	AKB54307.1	63.9038	16.1463	48.7246	4.46462	63.6763	8.09536	57.2604	7.9326	44.2308	11.2205	56.5807	8.62253	51.1595	13.7761	48.7705	13.5229
3',5'-cyclic-nucleotide phosphodiesterase] [protein_id=AKB54308.1	1260	3',5'-cyclic-nucleotide phosphodiesterase	AKB54308.1	99.5576	3.63634	71.4676	15.5124	72.5041	8.43514	84.164	17.396	61.5074	3.3369	78.5368	4.39505	68.8311	5.8842	79.0934	8.36765
hypothetical protein] [protein_id=AKB54309.1	1261	hypothetical protein	AKB54309.1	82.8122	16.9373	63.6914	9.49816	72.7256	9.07244	84.9678	31.4447	59.0093	4.99817	67.5906	3.35948	56.9978	10.4418	54.0313	7.11669
haloacid dehalogenase-like hydrolase] [protein_id=AKB54310.1	1262	haloacid dehalogenase-like hydrolase	AKB54310.1	1576.74	251.46	1278.34	247.156	992.654	79.1504	1096.62	101.964	1397.79	64.7361	1192.59	180.958	1064.6	270.156	884.037	147.881
Mobile element protein] [protein_id=AKB54311.1	1263	Mobile element protein	AKB54311.1	7.03589	7.45286	7.22486	2.44449	10.4801	6.54535	6.70383	5.47299	8.42112	4.9628	9.39797	2.25242	4.69936	5.90415	5.5056	4.41299
Mobile element protein] [protein_id=AKB54312.1	1264	Mobile element protein	AKB54312.1	12.1806	3.9794	5.53225	2.45531	10.5055	5.04583	10.0127	3.42171	2.80655	1.3721	3.23282	2.46409	4.6937	2.89599	6.96372	0.929165
Mobile element protein] [protein_id=AKB54313.1	1265	Mobile element protein	AKB54313.1	18.4785	4.00503	11.3898	8.12356	21.6372	6.97264	21.381	1.70693	9.5812	6.55033	13.8826	6.39565	13.1076	7.14078	26.6255	9.76764
Transcriptional regulator, MarR family] [protein_id=AKB54314.1	1266	Transcriptional regulator, MarR family	AKB54314.1	46.4945	8.33193	45.3756	14.4489	38.7394	9.45994	33.6436	13.586	28.8816	0.805899	29.4502	1.93415	34.8412	5.98489	47.2942	14.5436
ATP-dependent protease La Type I] [protein_id=AKB54315.1	1267	ATP-dependent protease La Type I	AKB54315.1	20.7887	9.08866	14.713	6.42534	14.1326	3.26204	12.2611	10.2148	22.7953	3.16916	13.9355	2.20312	31.8098	17.5827	30.4071	15.1659
Thioredoxin] [protein_id=AKB54316.1	1268	Thioredoxin	AKB54316.1	39.3403	9.13835	30.723	5.8471	52.4682	19.6219	70.5933	22.4763	30.9229	6.45789	42.0117	4.44672	46.2853	4.56579	57.7036	17.9708
ABC1 family protein] [protein_id=AKB54317.1	1269	ABC1 family protein	AKB54317.1	67.8139	12.3393	72.3829	13.6106	76.5873	18.4242	60.1916	13.3187	51.831	4.20416	74.0038	11.8863	60.3676	11.375	73.7809	8.6896
hypothetical protein] [protein_id=AKB54318.1	1270	hypothetical protein	AKB54318.1	10.1345	0.965634	14.2548	3.95936	16.8592	1.78937	15.8505	9.03958	13.6189	5.93415	13.4653	2.83961	12.6394	3.18248	13.0244	1.98998
iron-sulfur flavoprotein] [protein_id=AKB54319.1	1271	iron-sulfur flavoprotein	AKB54319.1	69.5645	20.9504	112.748	31.549	56.0113	10.4754	66.0224	9.35474	73.449	22.7638	73.6845	16.569	67.3875	12.3504	64.6132	12.9112
Membrane transport protein] [protein_id=AKB54320.1	1272	Membrane transport protein	AKB54320.1	125.881	45.8847	99.3913	20.1488	86.5834	6.50578	110.712	12.0099	88.1959	11.4515	128.68	11.3834	93.6116	33.1732	89.7156	17.4569
putative hydrolase] [protein_id=AKB54321.1	1273	putative hydrolase	AKB54321.1	13.6518	5.67856	6.28004	3.79934	3.56389	2.35813	9.27968	2.37181	5.19156	1.24755	11.6955	4.09961	6.2796	2.89466	5.12886	0.321225
hypothetical protein] [protein_id=AKB54322.1	1274	hypothetical protein	AKB54322.1	39.6576	14.5684	37.753	4.79427	47.5698	6.39682	39.9586	0.523175	41.5078	4.79285	44.1236	7.56089	43.8826	8.01335	38.7389	11.9819
TPR domain protein, putative component of TonB system] [protein_id=AKB54323.1	1275	TPR domain protein, putative component of TonB system	AKB54323.1	45.9436	8.52766	39.6428	3.98753	39.654	11.183	40.8621	5.24835	67.512	12.628	44.7183	3.63366	64.9235	15.7198	54.0107	23.3592
hypothetical protein] [protein_id=AKB54324.1	1276	hypothetical protein	AKB54324.1	5.95862	2.09084	5.92261	2.61995	8.3888	6.62684	6.72436	2.63257	4.39131	2.50963	4.2671	2.38973	3.49583	2.28364	5.81853	4.85169
hypothetical protein] [protein_id=AKB54325.1	1277	hypothetical protein	AKB54325.1	2.88768	2.77397	1.33425	0.619329	1.03895	0.250066	0	0	0.601572	1.04195	2.60579	1.0672	2.96992	1.65923	2.76559	1.7135
Aminoacyl-histidine dipeptidase (Peptidase D)] [protein_id=AKB54326.1	1278	Aminoacyl-histidine dipeptidase (Peptidase D)	AKB54326.1	23.8677	0.361801	43.6742	11.8265	46.6179	7.92082	37.7926	0.136501	40.7519	6.15396	42.3258	7.69764	35.3401	3.31347	35.3145	3.41358
Glutamate decarboxylase] [protein_id=AKB54327.1	1279	Glutamate decarboxylase	AKB54327.1	34.4762	5.63451	32.743	8.16106	45.6641	12.141	34.7365	6.06319	32.4514	3.0685	46.5807	8.7849	32.6937	10.7403	27.5297	1.77249
serine/threonine kinase] [protein_id=AKB54328.1	1280	serine/threonine kinase	AKB54328.1	13.3779	5.60601	12.2054	5.75479	10.5538	1.19402	8.81791	5.84832	12.0626	2.07781	13.0189	5.9444	13.7746	4.68217	7.67894	2.95937
hypothetical protein] [protein_id=AKB54329.1	1281	hypothetical protein	AKB54329.1	29.8988	18.4293	21.9045	4.88744	29.8145	8.16306	30.5855	11.3438	24.7161	2.90928	20.3911	2.26277	29.7389	14.9743	29.5125	9.00861
hypothetical protein] [protein_id=AKB54330.1	1282	hypothetical protein	AKB54330.1	1.07169	0.929055	0.715777	0.627489	4.92095	1.32545	1.95432	2.38198	5.65093	3.65134	3.28117	2.33842	3.91834	2.59244	2.8305	1.0738
hypothetical protein] [protein_id=AKB54331.1	1283	hypothetical protein	AKB54331.1	17.3708	3.03225	15.2659	7.37583	20.8712	6.41856	26.684	8.40819	15.0752	3.86357	18.6682	3.44065	24.6327	10.785	21.3052	1.96276
Phenylalanyl-tRNA synthetase beta chain] [protein_id=AKB54332.1	1284	Phenylalanyl-tRNA synthetase beta chain	AKB54332.1	301.045	26.6167	287.716	60.6719	264.708	23.8776	290.354	23.6131	371.676	14.1985	300.126	47.0141	365.573	37.8579	330.721	30.7838
hypothetical protein] [protein_id=AKB54333.1	1285	hypothetical protein	AKB54333.1	16.7083	9.51914	9.27693	3.99988	8.74221	6.35607	4.66592	2.52615	9.63477	2.5993	10.145	3.33396	7.91062	4.77891	8.93318	3.42296
Ribonuclease HII] [protein_id=AKB54334.1	1286	Ribonuclease HII	AKB54334.1	27.789	15.018	23.9871	1.86031	21.0618	7.52885	23.9232	5.70205	29.1471	4.64167	18.6253	6.85241	28.3197	10.6786	26.1584	3.34011
Phosphoribosylformylglycinamidine synthase, glutamine amidotransferase subunit] [protein_id=AKB54335.1	1287	Phosphoribosylformylglycinamidine synthase, glutamine amidotransferase subunit	AKB54335.1	19.3827	10.3683	20.2772	8.41329	24.2986	5.20125	19.3312	3.98735	26.0858	1.03915	26.8536	2.98858	22.8593	6.30863	22.9628	5.98575
Phosphoribosylformylglycinamidine synthase, PurS subunit] [protein_id=AKB54336.1	1288	Phosphoribosylformylglycinamidine synthase, PurS subunit	AKB54336.1	4.64593	4.50229	3.02593	2.74757	3.19652	3.46449	0.516403	0.47073	2.6829	2.6709	3.33723	3.10769	2.09614	2.80626	1.08718	0.324166
hypothetical protein] [protein_id=AKB54337.1	1289	hypothetical protein	AKB54337.1	201.63	26.8016	127.805	46.4514	166.104	24.0787	95.4371	36.4974	131.018	22.3711	137.407	36.0349	112.811	19.6057	104.618	27.8465
Dihydroxy-acid dehydratase] [protein_id=AKB54338.1	1290	Dihydroxy-acid dehydratase	AKB54338.1	306.225	17.7904	322.399	77.5553	289.075	23.6631	290.249	47.5916	294.896	32.7228	402.669	41.1451	371.548	61.0146	295.257	28.1731
hypothetical protein] [protein_id=AKB54339.1	1291	hypothetical protein	AKB54339.1	4947.69	695.583	4464.8	646.215	4614.75	115.552	4570.89	612.678	3421.53	247.198	4552.04	380.041	3928.08	387.695	4611.54	651.219
Thioredoxin] [protein_id=AKB54340.1	1292	Thioredoxin	AKB54340.1	56.4628	11.8777	51.0019	5.432	55.9257	5.2339	57.8653	7.06938	41.8664	3.59743	46.3663	8.96529	51.0993	15.0925	53.8786	11.8493
hypothetical protein] [protein_id=AKB54341.1	1293	hypothetical protein	AKB54341.1	49.0558	17.0251	30.2395	9.78063	22.1112	5.44876	16.7453	7.2944	37.4938	6.06643	23.8369	6.93328	15.3756	8.42436	19.5485	10.9656
Nitrogenase (iron-iron) reductase and maturation protein AnfH] [protein_id=AKB54342.1	1294	Nitrogenase (iron-iron) reductase and maturation protein AnfH	AKB54342.1	9.25135	3.7418	6.86767	1.72086	8.48285	4.51027	3.39595	1.9005	3.73475	1.73862	8.73169	0.881278	7.10512	3.92887	11.2629	1.10357
Nitrogen regulatory protein P-II] [protein_id=AKB54343.1	1295	Nitrogen regulatory protein P-II	AKB54343.1	5.65573	1.45165	11.6186	2.41085	5.18828	3.80396	6.71942	1.85517	4.24021	0.743386	7.99014	5.50415	3.4833	1.15119	6.90356	6.53458
Nitrogen regulatory protein P-II] [protein_id=AKB54344.1	1296	Nitrogen regulatory protein P-II	AKB54344.1	6.56127	1.0639	3.97105	0.984663	4.48039	0.87295	1.03404	0.191701	3.24006	1.15802	5.53581	1.32646	5.65527	1.28358	4.30776	2.06071
Nitrogenase (vanadium-iron) alpha chain] [protein_id=AKB54345.1	1297	Nitrogenase (vanadium-iron) alpha chain	AKB54345.1	22.1864	9.27286	17.3154	2.31537	25.011	4.96075	27.2984	9.3375	17.1138	6.03912	21.0081	2.80735	27.1826	6.6249	24.9089	4.08162
Nitrogenase (vanadium-iron) delta chain] [protein_id=AKB54346.1	1298	Nitrogenase (vanadium-iron) delta chain	AKB54346.1	6.9719	1.85781	7.3221	2.71384	7.43695	1.90182	2.88448	3.11529	7.8071	0.45602	8.22002	3.77588	8.37825	3.77722	3.90332	2.22362
Nitrogenase (vanadium-iron) beta chain] [protein_id=AKB54347.1	1299	Nitrogenase (vanadium-iron) beta chain	AKB54347.1	27.7983	11.2001	41.4988	7.19872	46.0623	8.83271	51.6123	3.99333	31.0161	5.24575	45.6239	8.34578	37.1467	7.90057	38.9443	11.2029
hypothetical protein] [protein_id=AKB54348.1	1300	hypothetical protein	AKB54348.1	13.6839	5.12061	26.0346	10.4255	23.3478	0.983621	14.0631	4.20173	14.3589	11.2233	28.1021	10.9942	12.3047	3.47339	21.9719	10.9277
Nitrogenase vanadium-cofactor synthesis protein VnfE] [protein_id=AKB54349.1	1301	Nitrogenase vanadium-cofactor synthesis protein VnfE	AKB54349.1	19.142	1.99303	22.1627	7.99691	33.1623	2.36866	31.4884	14.6445	17.1198	0.763702	29.7006	4.19559	26.2793	6.96572	24.5667	5.05885
Nitrogenase vanadium-cofactor synthesis protein VnfN] [protein_id=AKB54350.1	1302	Nitrogenase vanadium-cofactor synthesis protein VnfN	AKB54350.1	31.6501	11.9389	19.1331	11.6194	28.1223	9.29899	21.2153	8.77166	18.5979	2.22225	22.8555	7.09466	21.3844	3.9047	21.3062	3.37573
NifB-domain protein, type 2] [protein_id=AKB54351.1	1303	NifB-domain protein, type 2	AKB54351.1	1.97722	1.78149	3.74298	2.77542	4.38379	3.18229	4.67557	4.33073	5.22051	0.966741	3.69845	2.16899	7.77898	3.65207	8.23876	2.47767
Iron(III) ABC transporter, solute-binding protein] [protein_id=AKB54352.1	1304	Iron(III) ABC transporter, solute-binding protein	AKB54352.1	15.239	6.42358	9.7313	6.35537	18.7136	2.59977	12.7822	4.45034	17.2719	10.717	16.7401	7.83313	8.32307	1.73857	15.2562	6.05235
Coenzyme B synthesis from 2-oxoglutarate: steps 4, 7, 8, 11, and 12 (small subunit)] [protein_id=AKB54353.1	1305	Coenzyme B synthesis from 2-oxoglutarate: steps 4, 7, 8, 11, and 12 (small subunit)	AKB54353.1	5.80297	3.5214	4.71912	2.68725	7.8103	2.50316	9.42014	3.5731	7.31093	2.72523	5.33284	2.97038	4.70875	3.80083	4.01776	4.44565
Homocitrate synthase] [protein_id=AKB54354.1	1306	Homocitrate synthase	AKB54354.1	20.332	9.38684	11.6182	4.99479	17.2321	6.8447	10.8205	2.8809	12.0505	6.59199	16.0218	1.4139	15.3699	1.41736	15.1072	1.82463
Homocitrate synthase 1] [protein_id=AKB54355.1	1307	Homocitrate synthase 1	AKB54355.1	15.858	7.38215	14.0588	6.90587	19.3757	1.79958	15.8032	2.48416	12.1191	2.14218	22.888	10.3589	16.5615	15.0371	9.81814	4.47136
Iron(III) ABC transporter, ATP-binding protein] [protein_id=AKB54356.1	1308	Iron(III) ABC transporter, ATP-binding protein	AKB54356.1	6.32483	3.73314	7.55115	0.454379	2.9944	1.87398	6.59725	1.63938	3.4615	3.20345	4.90419	2.65162	3.96157	1.82094	3.57818	0.394988
Vitamin B12 ABC transporter, permease component BtuC] [protein_id=AKB54357.1	1309	Vitamin B12 ABC transporter, permease component BtuC	AKB54357.1	7.81802	5.75985	5.20522	8.18408	10.5453	1.52913	6.11719	3.43004	7.94461	3.11205	8.40969	5.41746	5.8615	1.88104	8.61923	3.26368
hypothetical protein] [protein_id=AKB54358.1	1310	hypothetical protein	AKB54358.1	7.62209	5.54807	7.77799	4.41743	16.0438	0.846256	9.90514	5.92987	8.53992	4.33464	6.7675	5.40154	5.43087	3.15763	6.97596	4.90824
hypothetical protein] [protein_id=AKB54359.1	1311	hypothetical protein	AKB54359.1	16.8318	7.57244	8.78566	5.43115	26.8161	4.56314	26.735	2.41427	13.1422	1.72862	9.69525	4.52613	15.9052	10.1772	18.4124	6.70718
hypothetical protein] [protein_id=AKB54360.1	1312	hypothetical protein	AKB54360.1	82.3899	28.6637	44.4597	17.9794	126.652	21.9089	117.775	23.0313	56.2083	18.5386	46.3357	11.3174	78.0451	35.7072	91.0481	19.5506
Asparagine synthetase (glutamine-hydrolyzing)] [protein_id=AKB54361.1	1313	Asparagine synthetase (glutamine-hydrolyzing)	AKB54361.1	37.3849	13.7637	44.1026	7.57329	54.0529	10.3048	42.393	6.53247	46.3456	12.0147	40.447	7.65231	42.9023	6.43722	43.1957	2.80618
Nickel insertion protein] [protein_id=AKB54362.1	1314	Nickel insertion protein	AKB54362.1	60.3945	4.17318	67.9599	11.4104	61.3634	6.85491	52.8991	9.00246	67.6396	15.7865	55.0438	6.85241	57.6259	4.68498	54.7029	2.26043
hypothetical protein] [protein_id=AKB54363.1	1315	hypothetical protein	AKB54363.1	49.2248	16.5276	37.3335	8.81249	49.4406	9.51867	39.4227	5.83754	43.78	11.5668	42.7473	5.43694	41.1948	6.68551	41.8381	9.54323
hypothetical protein] [protein_id=AKB54364.1	1316	hypothetical protein	AKB54364.1	2.95413	2.61012	0.878311	1.52128	2.1705	1.2712	0.307172	0.532037	2.30418	1.81593	2.15705	1.96225	3.5159	0.441301	2.68363	0.296241
chloramphenicol O-acetyltransferase] [protein_id=AKB54365.1	1317	chloramphenicol O-acetyltransferase	AKB54365.1	7.65745	4.84269	14.2892	2.0818	20.1408	7.76255	11.0698	3.32381	9.91139	3.19218	15.4195	3.3932	20.7506	3.81909	16.0672	8.25021
hypothetical protein] [protein_id=AKB54366.1	1318	hypothetical protein	AKB54366.1	13.6345	9.14138	5.66209	4.83129	7.9472	2.52404	8.41852	6.46567	6.42075	3.06211	9.4946	5.04475	11.0905	6.49893	9.08275	3.59006
chloramphenicol O-acetyltransferase] [protein_id=AKB54367.1	1319	chloramphenicol O-acetyltransferase	AKB54367.1	0.274914	0.476166	0.325707	0.564141	0.299193	0.518217	0	0	0	0	0.959052	1.66113	0.959052	1.66113	0	0
hypothetical protein] [protein_id=AKB54368.1	1320	hypothetical protein	AKB54368.1	20.6988	14.4098	16.2398	4.44483	15.178	4.59398	19.0287	4.55401	10.6106	0.651314	15.4768	7.0466	5.85149	2.49117	7.97477	4.39488
putative GTPase related to EngC] [protein_id=AKB54369.1	1321	putative GTPase related to EngC	AKB54369.1	7.22131	3.99821	2.99422	1.07452	3.98354	4.53307	5.58744	1.91639	6.22807	6.35979	5.85322	2.43361	4.92062	3.35159	2.45854	1.3505
hypothetical protein] [protein_id=AKB54370.1	1322	hypothetical protein	AKB54370.1	4.17486	7.23107	2.92956	0.977994	2.26957	1.22261	3.69965	5.62881	3.43397	1.33372	3.86444	0.951159	1.61346	1.98936	1.80345	1.25535
putative GTPase related to EngC] [protein_id=AKB54371.1	1323	putative GTPase related to EngC	AKB54371.1	21.774	10.3045	18.9426	3.98664	15.0521	8.00352	18.499	3.35143	18.5183	5.85704	24.1904	7.95975	22.9865	9.26938	21.6495	4.48728
Ferredoxin] [protein_id=AKB54372.1	1324	Ferredoxin	AKB54372.1	76.5773	8.94409	80.8497	16.7578	71.8326	6.98405	69.1476	21.7312	63.5887	4.68896	104.76	23.9058	93.5453	35.0263	68.0018	4.57564
hypothetical protein] [protein_id=AKB54373.1	1325	hypothetical protein	AKB54373.1	0	0	1.65938	1.50282	1.84641	3.0353	2.26396	1.267	1.88124	1.72848	1.64673	0.598448	1.99331	2.66544	3.4675	1.71619
O-methyltransferase] [protein_id=AKB54374.1	1326	O-methyltransferase	AKB54374.1	67.9688	15.1104	74.0468	10.9955	57.5197	3.91396	61.9676	7.5126	78.744	26.8982	90.2862	23.9005	64.0246	32.2395	51.7861	10.6423
sensory transduction histidine kinase] [protein_id=AKB54375.1	1327	sensory transduction histidine kinase	AKB54375.1	59.2305	0.845671	64.0555	12.5318	69.9877	12.6664	84.3287	27.3606	71.4548	9.24908	63.7882	7.17468	63.2335	17.5897	73.5128	8.95743
glycine radical enzyme activase, YjjW family] [protein_id=AKB54376.1	1328	glycine radical enzyme activase, YjjW family	AKB54376.1	126.609	9.40958	152.713	27.6758	172.481	45.3236	188.416	18.2287	138.394	13.8872	126.73	6.0325	127.767	21.1223	126.848	22.3139
MutT protein] [protein_id=AKB54377.1	1329	MutT protein	AKB54377.1	29.8953	6.9348	30.2991	8.49616	39.4757	6.66403	31.5716	7.19748	26.5243	5.44187	32.3131	9.2734	25.3911	3.03834	32.865	9.62052
Twin-arginine translocation protein TatA] [protein_id=AKB54378.1	1330	Twin-arginine translocation protein TatA	AKB54378.1	127.593	70.4949	87.7433	20.4795	93.6196	4.38295	125.052	14.024	106.538	15.1268	99.6382	31.6734	96.0061	40.8969	89.9248	6.90408
Twin-arginine translocation protein TatA] [protein_id=AKB54379.1	1331	Twin-arginine translocation protein TatA	AKB54379.1	257.83	63.0447	265.336	52.6567	219.933	57.1206	189.588	26.987	214.681	86.0965	264.429	48.2688	219.76	63.426	199.589	29.5649
Twin-arginine translocation protein TatC] [protein_id=AKB54380.1	1332	Twin-arginine translocation protein TatC	AKB54380.1	48.1149	13.4301	32.9392	4.42587	51.5	12.7614	44.9738	8.24954	35.3219	21.4554	44.4771	11.1247	53.1033	4.24658	55.037	10.0954
Twin-arginine translocation protein TatC] [protein_id=AKB54381.1	1333	Twin-arginine translocation protein TatC	AKB54381.1	124.709	32.5433	190.507	82.9909	190.964	80.2495	256.616	42.8468	119.028	48.0457	237.897	42.1959	155.99	46.0193	188.964	74.8664
hypothetical protein] [protein_id=AKB54382.1	1334	hypothetical protein	AKB54382.1	13.0432	8.55862	18.3572	3.23046	9.66717	6.62314	15.6689	3.71318	15.6758	8.93714	19.1539	2.5576	9.38054	5.99674	11.1639	5.55892
ATP-binding protein] [protein_id=AKB54383.1	1335	ATP-binding protein	AKB54383.1	1.51623	1.32822	1.17143	1.54979	2.38157	2.72256	2.48778	1.44401	0.375629	0.334487	0.8391	0.990526	0	0	0	0
hypothetical protein] [protein_id=AKB54384.1	1336	hypothetical protein	AKB54384.1	10.6469	9.89811	7.3221	2.71384	7.06607	0.774019	7.10401	2.93012	3.98674	2.09862	8.54426	2.40321	6.40307	4.24435	6.46403	2.12533
hypothetical protein] [protein_id=AKB54385.1	1337	hypothetical protein	AKB54385.1	2.71559	1.28955	0.911248	0.880162	3.17808	1.23542	3.09001	1.04526	5.21283	3.46716	3.46952	2.05929	10.9902	4.76199	8.71079	5.78121
transport protein] [protein_id=AKB54386.1	1338	transport protein	AKB54386.1	9.41359	6.05526	4.26329	3.91728	4.18966	3.10297	10.956	1.38396	5.7582	3.96599	3.8868	2.48435	8.24472	1.32647	11.8132	3.01787
hypothetical protein] [protein_id=AKB54387.1	1339	hypothetical protein	AKB54387.1	3.47353	2.96808	5.98878	0.789519	4.66559	3.80104	5.6478	4.44143	5.57777	2.40977	3.03991	1.93121	0.991651	0.960713	3.95492	3.90202
Putative transport protein] [protein_id=AKB54388.1	1340	Putative transport protein	AKB54388.1	31.1359	5.65552	20.049	0.892502	33.5507	10.7053	19.9369	4.47762	16.8235	2.88458	25.9538	4.23845	16.9715	10.2192	14.9507	5.16321
putative methyltransferase] [protein_id=AKB54389.1	1341	putative methyltransferase	AKB54389.1	7.44688	1.46628	6.21631	2.22609	9.9823	6.94686	12.638	8.71862	6.95515	2.13682	6.15054	1.01651	5.39077	3.89741	5.42737	4.72335
putative ribosomal RNA small subunit methyltransferase A] [protein_id=AKB54390.1	1342	putative ribosomal RNA small subunit methyltransferase A	AKB54390.1	20.5544	5.30991	28.151	8.78239	48.1642	6.18362	22.1091	1.51032	29.0317	8.08086	26.5909	2.1165	32.4179	4.23689	28.5861	8.96099
hypothetical protein] [protein_id=AKB54391.1	1343	hypothetical protein	AKB54391.1	130.352	6.55109	129.166	43.3253	140.508	19.7267	140.928	3.00411	169.614	13.202	95.3107	15.5674	139.899	43.9372	158.774	42.3909
DNA-directed RNA polymerase subunit F] [protein_id=AKB54392.1	1344	DNA-directed RNA polymerase subunit F	AKB54392.1	208.449	56.2917	226.878	30.6917	205.565	16.3157	233.699	32.4904	190.524	35.234	222.85	27.3479	230.437	52.8241	225.698	24.417
LSU ribosomal protein L21e] [protein_id=AKB54393.1	1345	LSU ribosomal protein L21e	AKB54393.1	155.951	17.8041	145.986	25.8146	124.27	33.813	118.259	17.903	163.078	42.8827	113.01	7.7067	145.441	34.3414	137.286	21.3944
tRNA pseudouridine 55 synthase Archaea] [protein_id=AKB54394.1	1346	tRNA pseudouridine 55 synthase Archaea	AKB54394.1	456.665	94.9724	521.818	43.5393	449.896	30.2652	446.799	30.2255	562.241	54.773	510.057	35.6426	563.508	37.6411	493.448	46.2982
protein of unknown function DUF358] [protein_id=AKB54395.1	1347	protein of unknown function DUF358	AKB54395.1	86.0118	10.5479	106.945	25.2216	94.4669	4.95308	88.5317	8.89723	116.518	23.279	115.64	20.3363	112.125	20.2981	122.74	12.7124
hypothetical protein] [protein_id=AKB54396.1	1348	hypothetical protein	AKB54396.1	1.33262	1.20582	1.10643	1.17642	0.804976	0.762902	1.74756	1.07213	2.17893	1.17205	1.73977	1.53025	2.17448	1.02031	2.53782	2.05712
hypothetical protein] [protein_id=AKB54397.1	1349	hypothetical protein	AKB54397.1	32.4769	20.0481	25.8098	7.58223	20.3823	6.19715	25.5728	11.1314	16.4374	2.9453	24.6426	9.29171	9.7629	4.04561	14.1568	9.57453
integrase] [protein_id=AKB54398.1	1350	integrase	AKB54398.1	12.2484	5.57317	14.3248	9.59583	10.629	5.93571	9.16986	8.89228	10.7341	4.93051	11.5956	3.4563	14.4203	6.27933	11.76	5.79306
Cacineurin superfamily phosphoesterase] [protein_id=AKB54399.1	1351	Cacineurin superfamily phosphoesterase	AKB54399.1	64.8813	21.6926	46.7041	9.51032	44.6779	8.69772	47.9794	10.206	70.3103	25.4054	50.3955	7.57714	64.6284	18.9813	48.2	10.6414
MgtC family] [protein_id=AKB54400.1	1352	MgtC family	AKB54400.1	56.5654	18.1017	57.2506	5.40437	58.9175	13.6486	45.2461	5.55559	42.964	7.87408	48.6738	8.10284	40.4463	3.0122	39.8804	14.8136
hypothetical protein] [protein_id=AKB54401.1	1353	hypothetical protein	AKB54401.1	52.9484	19.1111	22.6554	9.36179	32.2842	10.9338	36.8577	16.0567	27.0558	8.00882	24.3563	3.29549	29.0361	8.57659	26.5825	10.0905
hypothetical protein] [protein_id=AKB54402.1	1354	hypothetical protein	AKB54402.1	184.795	78.2011	281.532	39.6173	367.62	24.7054	364.52	76.7632	219.868	78.6663	303.571	46.6532	249.938	79.0157	200.647	9.90689
Zinc finger protein] [protein_id=AKB54403.1	1355	Zinc finger protein	AKB54403.1	138.243	37.8883	177.858	42.6426	240.367	31.3657	292.073	61.3334	126.563	30.0291	192.761	32.1572	191.482	38.7963	144.109	28.3217
Protein-disulfide reductase] [protein_id=AKB54404.1	1356	Protein-disulfide reductase	AKB54404.1	611.395	31.3589	796.756	339.697	781.08	173.257	998.294	238.154	503.009	89.8142	1033.08	137.458	556.039	368.322	375.074	48.5676
Energy-conserving hydrogenase (ferredoxin), subunit C] [protein_id=AKB54405.1	1357	Energy-conserving hydrogenase (ferredoxin), subunit C	AKB54405.1	2.87123	2.92658	4.39434	1.46699	2.18942	1.35231	3.73106	1.90329	5.30902	2.40945	2.42973	2.23286	0.352283	0.610171	1.13773	1.33044
hypothetical protein] [protein_id=AKB54406.1	1358	hypothetical protein	AKB54406.1	37.3925	5.21945	26.8838	4.62279	28.1627	5.15366	39.9461	18.8939	49.2504	15.1449	36.2211	11.98	37.4055	15.1221	40.3476	12.8631
hypothetical protein] [protein_id=AKB54407.1	1359	hypothetical protein	AKB54407.1	5.68964	2.9986	5.3703	1.29122	6.63196	2.99831	5.47491	2.4009	5.05413	3.11563	5.6334	1.16934	4.82724	1.85145	5.34437	3.17295
hypothetical protein] [protein_id=AKB54408.1	1360	hypothetical protein	AKB54408.1	124.132	6.49242	150.333	9.17432	91.1261	2.64804	86.7431	5.58055	116.552	41.6734	153.702	11.9226	114.396	41.393	90.8076	10.1331
hypothetical protein] [protein_id=AKB54409.1	1361	hypothetical protein	AKB54409.1	0.549829	0.952331	1.07413	0.834105	1.38245	0.704488	0	0	1.10703	0.304378	0.417274	0.491499	1.37653	1.62598	0.0963186	0.166829
hypothetical protein] [protein_id=AKB54410.1	1362	hypothetical protein	AKB54410.1	1.866	1.95578	7.71258	6.14504	10.3283	2.56188	7.63994	5.68087	4.15628	0.477282	7.3025	2.81446	8.64275	2.13185	8.334	4.77092
hypothetical protein] [protein_id=AKB54411.1	1363	hypothetical protein	AKB54411.1	4947.69	695.583	4464.8	646.215	4614.69	115.647	4570.89	612.678	3421.53	247.198	4552.04	380.041	3928.08	387.695	4611.54	651.219
Glycosyltransferase] [protein_id=AKB54412.1	1364	Glycosyltransferase	AKB54412.1	27.236	2.33237	23.2054	6.03204	26.5916	7.4625	23.9413	2.47884	23.6048	5.9472	27.8363	6.0593	25.8117	7.23503	24.7141	9.35234
hypothetical protein] [protein_id=AKB54413.1	1365	hypothetical protein	AKB54413.1	14.2278	6.26458	13.3764	3.03129	14.278	2.63627	7.79104	6.31544	10.6777	1.05571	14.8494	7.34368	10.6793	9.35231	14.6383	10.5388
SAM-dependent methyltransferase] [protein_id=AKB54414.1	1366	SAM-dependent methyltransferase	AKB54414.1	16.4205	6.77953	12.8873	3.55668	15.0128	2.75739	15.0041	8.34858	7.79492	1.49121	17.2682	2.04676	15.7604	7.20131	14.6538	8.3079
hypothetical protein] [protein_id=AKB54415.1	1367	hypothetical protein	AKB54415.1	53.0302	11.8435	55.3944	6.58944	38.4556	12.6708	30.7781	1.97888	37.5059	7.2898	55.2225	7.86014	41.7182	5.02433	41.504	0.367604
hypothetical protein] [protein_id=AKB54416.1	1368	hypothetical protein	AKB54416.1	5.02757	5.53513	6.11774	3.82956	7.37373	2.00803	4.13493	1.19522	7.09246	2.24189	7.68734	2.87244	4.64606	2.46116	8.09772	1.45212
hypothetical protein] [protein_id=AKB54417.1	1369	hypothetical protein	AKB54417.1	27.0083	7.05185	33.4925	3.05569	31.7256	6.49023	25.3225	3.11744	25.8245	13.1993	24.1702	5.2861	29.8604	8.53858	22.2594	12.2502
hypothetical protein] [protein_id=AKB54418.1	1370	hypothetical protein	AKB54418.1	47.9712	12.126	35.6718	3.2417	41.2215	5.7544	37.1434	12.7077	54.8728	1.71115	48.8458	16.2721	37.4193	3.29339	33.2881	7.10198
Molybdenum ABC transporter, periplasmic molybdenum-binding protein ModA] [protein_id=AKB54419.1	1371	Molybdenum ABC transporter, periplasmic molybdenum-binding protein ModA	AKB54419.1	10.7651	2.65889	11.8786	9.18726	11.2368	3.266	9.40902	6.57659	13.5393	1.99811	8.19862	6.74964	12.4081	5.72322	13.9876	2.46179
acidic integral membrane protein] [protein_id=AKB54420.1	1372	acidic integral membrane protein	AKB54420.1	30.62	3.77694	24.6774	15.8862	26.3238	2.96278	27.6565	3.99856	22.1005	1.56172	24.397	7.09978	21.0001	5.45186	21.6446	5.85363
GTP cyclohydrolase III (methanopterin)] [protein_id=AKB54421.1	1373	GTP cyclohydrolase III (methanopterin)	AKB54421.1	240.891	46.1706	302.501	22.0264	226.25	10.8883	211.12	18.4388	251.362	43.1289	273.482	11.1571	254.709	27.0542	218.926	62.0527
hypothetical protein] [protein_id=AKB54422.1	1374	hypothetical protein	AKB54422.1	0	0	0.325707	0.564141	0	0	0	0	0	0	0	0	0	0	0	0
Hydrolase, HAD superfamily] [protein_id=AKB54423.1	1375	Hydrolase, HAD superfamily	AKB54423.1	33.0303	19.4094	38.0455	5.88547	34.3969	2.45681	34.5191	10.4532	33.6486	4.87117	37.3743	3.90644	25.7797	8.87564	25.5889	10.4826
O-linked N-acetylglucosamine transferase] [protein_id=AKB54424.1	1376	O-linked N-acetylglucosamine transferase	AKB54424.1	114.196	20.506	127.196	27.162	147.281	25.5086	124.496	23.4937	126.087	9.38001	120.428	18.1568	101.783	22.1935	86.7542	9.06276
response regulator receiver] [protein_id=AKB54425.1	1377	response regulator receiver	AKB54425.1	7.10059	5.80269	5.40318	2.15218	9.74835	6.03506	6.49313	5.11709	5.22341	3.41609	4.71128	1.77315	2.46157	2.04181	8.40687	6.63397
hypothetical protein] [protein_id=AKB54426.1	1378	hypothetical protein	AKB54426.1	72.8438	6.70199	61.8468	16.7885	43.9914	7.92075	65.3855	16.6616	50.4554	15.1866	48.3214	4.01964	52.3706	5.48833	54.3649	16.4039
Thioredoxin reductase] [protein_id=AKB54427.1	1379	Thioredoxin reductase	AKB54427.1	520.409	150.406	825.171	59.7951	734.642	151.861	917.76	30.5174	590.207	94.217	823.25	55.8847	615.272	134.524	554.713	85.9163
Thioredoxin] [protein_id=AKB54428.1	1380	Thioredoxin	AKB54428.1	112.273	28.0568	113.627	10.533	87.2242	10.0426	96.3002	22.0618	100.318	2.42671	103.136	10.3057	90.643	21.0555	74.8767	8.31812
Diphthine synthase] [protein_id=AKB54429.1	1381	Diphthine synthase	AKB54429.1	79.7209	5.98977	102.576	41.5593	136.596	35.9554	96.9683	14.9323	86.3552	11.1016	117.212	28.8147	88.6866	13.5627	96.615	5.63513
hypothetical protein] [protein_id=AKB54430.1	1382	hypothetical protein	AKB54430.1	20.6352	3.14824	34.9198	19.4324	31.0202	5.92284	23.8591	1.52992	16.9962	1.53647	38.8731	17.4214	20.6673	4.40047	20.6511	5.54577
hypothetical protein] [protein_id=AKB54431.1	1383	hypothetical protein	AKB54431.1	183.904	9.13919	217.486	10.1167	220.537	9.53793	229.133	43.5278	188.869	60.258	230.4	20.16	228.174	34.5242	197.768	34.1383
Inosine-guanosine kinase] [protein_id=AKB54432.1	1384	Inosine-guanosine kinase	AKB54432.1	129.585	17.969	119.406	27.9098	130.721	13.1029	127.795	8.23718	129.127	6.41288	146.984	14.263	145.632	18.0452	147.499	7.45866
hypothetical protein] [protein_id=AKB54433.1	1385	hypothetical protein	AKB54433.1	98.2018	35.9395	87.3219	6.94352	90.4963	5.12967	87.789	25.4978	92.78	20.5017	90.3691	6.00459	105.038	34.913	95.9162	8.91644
UTP--glucose-1-phosphate uridylyltransferase] [protein_id=AKB54434.1	1386	UTP--glucose-1-phosphate uridylyltransferase	AKB54434.1	65.6414	24.6324	66.5274	13.2536	57.9314	11.0456	70.0265	12.1361	74.5243	14.2332	61.9742	6.2385	75.9639	14.3098	77.2021	7.73377
hypothetical protein] [protein_id=AKB54435.1	1387	hypothetical protein	AKB54435.1	4.21436	3.56905	1.20402	1.33204	2.49061	2.7154	4.45545	2.16935	1.91927	1.24362	2.47673	2.40154	1.77456	2.62931	0.288956	0.500486
Iron-sulfur cluster binding protein] [protein_id=AKB54436.1	1388	Iron-sulfur cluster binding protein	AKB54436.1	16.7471	10.7795	13.0502	3.94924	10.4234	1.84643	13.5355	4.53288	21.6988	3.32891	12.6061	1.09144	16.3459	3.36518	14.8976	8.28874
Tungsten-containing aldehyde:ferredoxin oxidoreductase] [protein_id=AKB54437.1	1389	Tungsten-containing aldehyde:ferredoxin oxidoreductase	AKB54437.1	63.561	6.01175	65.2243	11.1806	70.1125	14.2926	59.2365	4.62038	70.4024	19.9137	64.8727	6.53813	67.1851	5.16795	51.3217	15.5765
phosphatidylethanolamine N-methyltransferase] [protein_id=AKB54438.1	1390	phosphatidylethanolamine N-methyltransferase	AKB54438.1	345.697	53.1764	306.472	32.0974	161.041	33.3829	234.616	77.8439	345.1	30.1906	271.169	35.6447	253.931	45.138	175.89	44.8502
sensory transduction histidine kinase] [protein_id=AKB54439.1	1391	sensory transduction histidine kinase	AKB54439.1	61.3801	13.3978	52.2428	9.83712	57.0607	6.97498	56.7474	14.2146	52.9506	13.0202	39.8286	4.81985	38.9444	7.59938	49.8209	3.91733
hypothetical protein] [protein_id=AKB54440.1	1392	hypothetical protein	AKB54440.1	32.9983	17.1393	16.0766	5.85387	19.2134	2.91146	23.6086	5.19637	23.5482	2.3815	22.0456	1.52875	13.3622	8.49598	16.4349	8.18698
hypothetical protein] [protein_id=AKB54441.1	1393	hypothetical protein	AKB54441.1	4.77078	6.02863	3.25498	0.565952	5.05985	2.08246	6.8223	1.95873	6.85266	3.28568	4.18185	1.43994	6.60369	3.1002	4.66163	1.61619
putative permease (major facilitator superfamily)] [protein_id=AKB54442.1	1394	putative permease (major facilitator superfamily)	AKB54442.1	20.8902	6.80079	17.249	3.42181	14.0246	2.28425	15.6172	6.433	14.2857	3.26494	20.2844	4.04693	17.6127	6.62047	11.2582	1.49345
molybdenum cofactor biosynthesis protein A] [protein_id=AKB54443.1	1395	molybdenum cofactor biosynthesis protein A	AKB54443.1	42.3647	13.1174	23.8555	7.73709	75.3929	7.88562	72.1985	19.7159	37.9422	4.55273	31.6962	4.49591	38.3164	9.96505	49.7943	6.73072
hypothetical protein] [protein_id=AKB54444.1	1396	hypothetical protein	AKB54444.1	21.0878	4.52732	17.4103	6.76023	28.1084	3.87193	23.5713	4.43244	14.4144	4.83242	21.45	3.02585	17.9499	6.84937	19.1037	8.80373
hypothetical protein] [protein_id=AKB54445.1	1397	hypothetical protein	AKB54445.1	0	0	0.975902	1.69031	0	0	0	0	0.106881	0.185123	0.975902	1.69031	0	0	0	0
Lead, cadmium, zinc and mercury transporting ATPase] [protein_id=AKB54446.1	1398	Lead, cadmium, zinc and mercury transporting ATPase	AKB54446.1	31.8994	11.2137	32.2204	5.05739	45.1449	1.10918	36.8929	3.94693	25.6552	6.25659	37.6858	10.459	34.2168	14.2233	32.3026	8.49314
hypothetical protein] [protein_id=AKB54447.1	1399	hypothetical protein	AKB54447.1	11.0984	2.2968	10.2517	2.5314	10.7937	5.0638	9.66303	5.72125	9.69575	4.22951	11.4519	1.79609	14.4886	4.75187	13.6614	5.49589
Potassium efflux system KefA protein] [protein_id=AKB54448.1	1400	Potassium efflux system KefA protein	AKB54448.1	8.2122	7.12973	4.42455	4.70589	5.711	0.501115	9.05709	4.44578	5.807	2.5466	8.57572	0.822231	8.56692	1.50645	6.20168	1.86791
hypothetical protein] [protein_id=AKB54449.1	1401	hypothetical protein	AKB54449.1	10.4734	5.5607	10.416	4.06867	13.4198	1.59278	6.21637	2.77047	6.20538	1.03356	7.11183	3.98288	5.61456	4.07805	6.70719	5.28261
hypothetical protein] [protein_id=AKB54450.1	1402	hypothetical protein	AKB54450.1	3.24303	3.3004	0.944184	0.978784	0.299193	0.518217	0.836926	1.4496	0.592484	0.765505	0.93669	0.967201	1.03929	1.05728	0.334726	0.579762
Coenzyme F420 hydrogenase subunit alpha] [protein_id=AKB54451.1	1403	Coenzyme F420 hydrogenase subunit alpha	AKB54451.1	726.283	125.619	1212.4	237.38	874.595	35.7843	812.405	197.072	1277.27	119.667	940.068	2.32351	1229.32	259.973	1372.17	130.336
Coenzyme F420 hydrogenase subunit gamma] [protein_id=AKB54452.1	1404	Coenzyme F420 hydrogenase subunit gamma	AKB54452.1	281.172	85.7606	587.17	171.837	362.017	6.92442	411.072	72.1742	540.16	59.577	440.981	44.8103	482.517	28.2255	506.71	87.6703
hypothetical protein] [protein_id=AKB54453.1	1405	hypothetical protein	AKB54453.1	100.684	15.0668	106.467	34.1328	76.8849	12.0303	93.089	6.90784	131.04	10.3898	97.2544	21.641	133.856	22.88	132.743	37.4215
hypothetical protein] [protein_id=AKB54454.1	1406	hypothetical protein	AKB54454.1	15.7458	2.04454	12.075	5.59068	15.7869	5.35865	13.9263	3.26342	6.55368	4.0181	21.2977	7.49192	9.66511	6.92764	14.8555	6.54972
hypothetical protein] [protein_id=AKB54455.1	1407	hypothetical protein	AKB54455.1	12.0859	6.88431	21.839	7.49674	24.8656	16.8279	15.0318	7.76723	10.9661	3.63333	23.2559	5.02777	10.9489	10.49	6.81682	4.12857
hypothetical protein] [protein_id=AKB54456.1	1408	hypothetical protein	AKB54456.1	11.351	3.74596	4.23024	4.06228	4.85526	3.4964	6.51983	4.08252	5.36729	3.42107	6.45788	2.07486	1.59842	2.76855	4.74941	4.11746
hypothetical protein] [protein_id=AKB54457.1	1409	hypothetical protein	AKB54457.1	19.7527	3.25243	24.8044	7.52306	30.1321	3.50834	19.7227	7.93548	22.7343	2.75011	22.6111	3.68753	23.703	6.10838	30.3395	5.31062
hypothetical protein] [protein_id=AKB54458.1	1410	hypothetical protein	AKB54458.1	10.0866	5.13759	7.22399	5.37122	12.2907	4.12	15.5131	3.43065	7.19476	1.64734	6.18975	1.18846	5.88408	2.55973	7.24041	3.68288
Translation initiation factor 1A] [protein_id=AKB54459.1	1411	Translation initiation factor 1A	AKB54459.1	8.36718	10.0882	6.47847	5.37914	6.0525	1.21207	8.1791	6.3264	7.99502	1.48929	4.16723	2.41804	7.70818	5.71129	2.79327	1.92994
Threonine dehydrogenase and related Zn-dependent dehydrogenase] [protein_id=AKB54460.1	1412	Threonine dehydrogenase and related Zn-dependent dehydrogenase	AKB54460.1	90.2341	18.8331	86.4512	13.9468	68.082	14.6179	72.0078	7.45986	64.6164	13.9271	79.408	15.1186	71.2714	22.1986	52.9814	3.8624
cell surface protein] [protein_id=AKB54461.1	1413	cell surface protein	AKB54461.1	53.3607	0.214522	43.0588	6.245	60.3911	6.9351	47.2916	14.17	50.0733	8.77215	46.8611	7.43443	42.6465	11.0808	46.967	12.5681
Superoxide dismutase [Cu-Zn] precursor] [protein_id=AKB54462.1	1414	Superoxide dismutase [Cu-Zn] precursor	AKB54462.1	4.16747	1.83195	4.10157	1.55295	3.97261	2.10361	3.22553	3.21988	4.13501	3.58272	4.38158	1.2349	5.55937	1.61151	4.72071	2.91521
Undecaprenyl diphosphate synthase] [protein_id=AKB54463.1	1415	Undecaprenyl diphosphate synthase	AKB54463.1	26.3535	6.84873	28.9307	9.71286	37.8632	8.52434	34.4004	4.38822	19.8377	1.57527	28.3835	9.35859	25.0006	7.65393	21.8575	5.89966
Nitrogen regulatory protein P-II] [protein_id=AKB54464.1	1416	Nitrogen regulatory protein P-II	AKB54464.1	57.4244	21.9065	29.7438	10.9278	48.5345	16.9824	40.591	6.37432	31.0542	12.8647	59.0264	16.1739	55.2665	10.9883	49.2462	13.3253
hypothetical protein] [protein_id=AKB54465.1	1417	hypothetical protein	AKB54465.1	43.526	2.97075	29.88	3.76032	41.6626	5.9504	33.1277	8.7578	29.1352	6.6407	34.0776	5.76063	40.7855	7.90727	33.2163	5.81057
hypothetical protein] [protein_id=AKB54466.1	1418	hypothetical protein	AKB54466.1	38.0896	8.88952	51.3445	41.7668	41.2728	5.0939	26.968	15.8263	21.1722	8.08609	86.3323	17.9674	37.0746	50.2707	12.745	1.64798
hypothetical protein] [protein_id=AKB54467.1	1419	hypothetical protein	AKB54467.1	45.2199	22.4266	39.2818	7.15558	41.7731	2.59838	27.404	5.27686	25.066	3.10999	43.3885	16.9178	30.9159	24.4017	21.6723	2.13369
hypothetical protein] [protein_id=AKB54468.1	1420	hypothetical protein	AKB54468.1	152.773	16.4955	165.333	20.9543	202.842	6.04605	241.125	30.0492	117.689	3.39459	155.391	21.4832	153.59	7.3882	147.28	28.8087
Calcium-binding acidic-repeat protein precursor (ARP)] [protein_id=AKB54469.1	1421	Calcium-binding acidic-repeat protein precursor (ARP)	AKB54469.1	9.4759	4.00412	6.12076	5.04233	8.27377	0.951508	12.7773	3.56877	12.9744	6.96926	8.30212	3.46487	6.61181	2.99519	11.0208	3.33981
hypothetical protein] [protein_id=AKB54470.1	1422	hypothetical protein	AKB54470.1	4947.43	695.717	4464.48	646.038	4614.75	115.552	4570.68	612.351	3420.91	247.589	4550.75	381.421	3927.13	386.65	4611.54	651.219
hypothetical protein] [protein_id=AKB54471.1	1423	hypothetical protein	AKB54471.1	13.6615	6.22679	8.7536	5.87766	6.96501	1.18198	9.37044	4.0209	10.5252	5.20818	9.33955	5.53533	16.3327	7.93394	14.8677	2.83164
Alpha-acetolactate decarboxylase] [protein_id=AKB54472.1	1424	Alpha-acetolactate decarboxylase	AKB54472.1	3.87365	2.54187	5.07724	2.37487	3.4942	1.66412	9.41049	4.31314	4.81116	4.44045	3.74448	2.90795	4.28315	3.0235	5.51999	3.19828
secondary thiamine-phosphate synthase enzyme] [protein_id=AKB54473.1	1425	secondary thiamine-phosphate synthase enzyme	AKB54473.1	55.6982	16.0008	43.77	17.0564	61.3619	6.34501	38.8717	8.18773	57.5526	2.44379	61.716	4.24993	67.8558	7.28517	44.9332	16.4722
hypothetical protein] [protein_id=AKB54474.1	1426	hypothetical protein	AKB54474.1	26.9912	12.645	20.0496	5.09816	25.8618	7.26555	19.58	6.38318	24.7103	3.02178	18.225	2.93959	24.5956	4.44044	16.9447	5.3974
Haloacid dehalogenase-like hydrolase] [protein_id=AKB54475.1	1427	Haloacid dehalogenase-like hydrolase	AKB54475.1	20.341	8.5979	14.1245	5.22027	12.098	5.07754	14.5466	3.41251	13.5959	5.00216	21.0674	2.53643	18.2797	4.9742	17.04	10.2479
hypothetical protein] [protein_id=AKB54476.1	1428	hypothetical protein	AKB54476.1	12.4605	6.28222	16.6305	5.21416	22.2282	5.58838	19.7616	8.65053	12.9393	5.92119	17.7807	4.12488	11.8264	3.21629	10.7659	5.34328
Formylmethanofuran dehydrogenase subunit D] [protein_id=AKB54477.1	1429	Formylmethanofuran dehydrogenase subunit D	AKB54477.1	80.1683	12.44	66.8115	20.6468	91.7414	7.70809	90.6094	8.1683	64.2665	2.16846	100.309	17.7987	70.6596	18.5866	67.7613	18.4397
Formylmethanofuran dehydrogenase subunit B] [protein_id=AKB54478.1	1430	Formylmethanofuran dehydrogenase subunit B	AKB54478.1	247.497	19.2368	261.535	38.4473	340.37	29.3798	288.014	29.8119	273.419	34.4176	300.92	31.307	289.962	15.3279	285.3	21.1375
Tungsten-containing formylmethanofuran dehydrogenase 2 subunit G] [protein_id=AKB54479.1	1431	Tungsten-containing formylmethanofuran dehydrogenase 2 subunit G	AKB54479.1	135.56	47.5097	116.97	15.3322	136.364	18.4225	174.473	13.3518	139.018	15.3008	137.026	13.7335	141.418	15.5244	115.899	17.496
Rubredoxin] [protein_id=AKB54480.1	1432	Rubredoxin	AKB54480.1	59.5065	6.9714	54.2858	11.2086	62.6009	7.18127	48.2458	10.777	52.3758	11.7732	50.2613	12.2702	42.3061	5.87831	45.2317	4.69665
Mobile element protein] [protein_id=AKB54481.1	1433	Mobile element protein	AKB54481.1	26.7718	3.21517	27.7654	5.63396	25.9554	5.3377	35.3578	17.8059	23.7665	3.39709	25.2224	3.08525	35.2743	6.7108	33.6644	9.40628
Mobile element protein] [protein_id=AKB54482.1	1434	Mobile element protein	AKB54482.1	98.9357	14.729	109.513	21.3871	128.926	8.33031	107.11	46.8275	89.221	12.3422	106.599	15.4786	114.383	19.7346	116.085	31.6482
Mobile element protein] [protein_id=AKB54483.1	1435	Mobile element protein	AKB54483.1	28.9953	12.9762	23.3358	12.666	20.2713	6.92833	13.0421	6.80141	17.6803	8.66232	26.0536	7.75938	10.9764	8.1034	12.3155	11.0354
O-methyltransferase] [protein_id=AKB54484.1	1436	O-methyltransferase	AKB54484.1	60.6212	10.9671	75.61	6.93072	32.7183	14.3377	45.001	14.9089	54.8173	18.0814	65.5357	2.16985	43.4714	18.3978	41.4039	2.14419
Iron(III) dicitrate transport system permease protein FecD] [protein_id=AKB54485.1	1437	Iron(III) dicitrate transport system permease protein FecD	AKB54485.1	0	0	1.30196	1.49115	1.10217	0.359566	0.616814	1.06835	1.23067	1.72819	0.641644	0.55569	0.319684	0.553709	0.270863	0.469148
Vitamin B12 ABC transporter, ATPase component BtuD] [protein_id=AKB54486.1	1438	Vitamin B12 ABC transporter, ATPase component BtuD	AKB54486.1	4.73375	2.97072	2.83226	1.96213	4.84081	1.26147	1.96891	1.11198	3.27519	1.09511	4.08881	1.59524	6.26393	2.14979	4.2934	2.39148
Vitamin B12 ABC transporter, ATPase component BtuD] [protein_id=AKB54487.1	1439	Vitamin B12 ABC transporter, ATPase component BtuD	AKB54487.1	1.1969	1.42003	1.07384	1.61305	1.08326	0.628025	0	0	0.161868	0.280363	0.417274	0.491499	1.00669	0.048946	0.431044	0.516947
Periplasmic binding protein] [protein_id=AKB54488.1	1440	Periplasmic binding protein	AKB54488.1	0	0	1.07384	1.61305	1.23061	1.06695	0	0	0.106881	0.185123	1.06347	1.59517	0	0	0	0
Periplasmic binding protein] [protein_id=AKB54489.1	1441	Periplasmic binding protein	AKB54489.1	1.36059	1.72372	2.05003	1.12485	2.6489	1.73581	0.725635	0.650213	2.68748	2.46926	1.71514	1.30367	0.65441	0.567184	3.95865	4.59
CoB--CoM heterodisulfide reductase subunit A] [protein_id=AKB54490.1	1442	CoB--CoM heterodisulfide reductase subunit A	AKB54490.1	192.282	46.5336	240.944	10.8467	231.053	13.2979	254.368	47.7112	267.129	22.4246	275.218	22.5816	269.79	27.7013	190.794	41.0552
Polyferredoxin protein MvhB] [protein_id=AKB54491.1	1443	Polyferredoxin protein MvhB	AKB54491.1	108.707	18.6071	173.606	31.6553	158.105	14.1139	138.485	12.3795	168.927	4.02423	177.246	25.3558	165.59	32.7441	144.133	12.6741
hypothetical protein] [protein_id=AKB54492.1	1444	hypothetical protein	AKB54492.1	25.2041	13.1762	25.3547	10.2954	27.8147	9.59501	23.2084	12.6871	14.6552	3.44011	26.4271	5.76478	24.407	5.16061	20.2627	2.48013
Universal stress protein] [protein_id=AKB54493.1	1445	Universal stress protein	AKB54493.1	24.8677	5.62732	25.3841	8.49758	41.6427	4.38055	46.0684	7.06583	26.646	11.3762	31.5972	3.56126	43.4552	12.4956	33.1642	11.7026
GTPases - Sulfate adenylate transferase subunit 1] [protein_id=AKB54494.1	1446	GTPases - Sulfate adenylate transferase subunit 1	AKB54494.1	25.4802	4.37426	37.5967	10.6227	31.5653	7.97553	34.4558	4.37367	32.0195	9.35332	38.4634	9.38706	30.6251	16.4394	19.2766	3.82592
hypothetical protein] [protein_id=AKB54495.1	1447	hypothetical protein	AKB54495.1	7.74976	3.30896	6.47591	6.29653	5.76775	2.87023	2.98366	3.82901	4.60985	1.81117	5.11398	2.21586	6.83811	0.944496	9.15722	1.90192
hypothetical protein] [protein_id=AKB54496.1	1448	hypothetical protein	AKB54496.1	4947.69	695.583	4464.8	646.215	4614.75	115.552	4570.89	612.678	3421.53	247.198	4552.04	380.041	3928.08	387.695	4611.54	651.219
hypothetical protein] [protein_id=AKB54497.1	1449	hypothetical protein	AKB54497.1	105.144	22.1246	67.2703	13.5739	101.854	13.768	94.706	3.01836	98.4921	15.0088	75.6087	9.64135	89.0527	8.33212	98.5366	1.09509
hypothetical protein] [protein_id=AKB54498.1	1450	hypothetical protein	AKB54498.1	8.7466	3.21009	8.29928	2.12618	21.5601	5.62568	12.9274	2.77793	10.748	3.33436	10.7857	3.59029	9.03015	1.80889	10.0422	3.69072
Mobile element protein] [protein_id=AKB54499.1	1451	Mobile element protein	AKB54499.1	19.3172	6.128	13.2135	8.10917	24.2145	5.03237	25.0854	2.31753	11.6822	6.41663	14.7171	6.69832	18.0628	6.15088	28.7627	8.45529
Mobile element protein] [protein_id=AKB54500.1	1452	Mobile element protein	AKB54500.1	15.4097	6.88315	11.9418	7.72834	16.5685	1.6328	14.8745	2.80459	5.88016	2.48581	11.8623	7.46681	7.60094	3.84347	11.1304	2.33779
Mobile element protein] [protein_id=AKB54501.1	1453	Mobile element protein	AKB54501.1	1.09966	1.90466	2.8961	4.27815	3.36327	3.74385	1.23363	2.13671	0	0	1.57151	2.00985	1.27874	2.21484	1.25214	2.16877
antigen] [protein_id=AKB54502.1	1454	antigen	AKB54502.1	125.029	10.8271	221.994	32.9496	140.601	45.0475	153.078	10.5092	163.699	56.3806	190.998	34.8613	123.687	48.8621	103.909	16.954
Mobile element protein] [protein_id=AKB54503.1	1455	Mobile element protein	AKB54503.1	6.49794	4.33126	8.78625	5.06822	8.25239	3.7917	6.0059	2.57672	7.34155	2.52337	9.37329	4.66529	6.09282	3.26275	7.69805	5.38497
Mobile element protein] [protein_id=AKB54504.1	1456	Mobile element protein	AKB54504.1	7.32167	3.40776	4.88166	3.90343	11.07	3.20573	11.6403	5.11148	5.95191	1.20945	6.44878	3.91259	6.57612	5.82697	8.78256	7.66943
hypothetical protein] [protein_id=AKB54505.1	1457	hypothetical protein	AKB54505.1	12.8168	6.50644	19.2326	7.40642	16.5097	5.08739	18.5306	6.56408	13.8632	6.23145	18.4087	6.74556	11.686	9.31949	15.8527	19.0713
hypothetical protein] [protein_id=AKB54506.1	1458	hypothetical protein	AKB54506.1	2.90725	2.48367	2.3105	1.4813	2.68076	2.6748	3.922	3.70865	0.161868	0.280363	2.61261	1.9957	0.848108	0.798438	2.60646	2.26245
hypothetical protein] [protein_id=AKB54507.1	1459	hypothetical protein	AKB54507.1	15.8391	9.66246	16.1767	1.66142	13.0569	5.87708	14.3519	1.35833	12.3892	3.75498	15.3702	1.03733	12.7247	4.07204	6.34377	2.05019
Glutamate-rich protein grpB] [protein_id=AKB54508.1	1460	Glutamate-rich protein grpB	AKB54508.1	9.99385	5.47142	5.23914	2.50596	11.5947	1.619	13.2937	3.6215	3.48445	3.52783	8.72486	2.4777	9.5962	5.86611	5.42259	2.72509
hypothetical protein] [protein_id=AKB54509.1	1461	hypothetical protein	AKB54509.1	3.40606	5.20159	1.36626	2.36644	5.55518	1.18357	3.09966	1.92954	3.96998	3.4665	3.61543	1.51464	2.0485	2.11671	1.60123	1.58939
Methyltransferase] [protein_id=AKB54510.1	1462	Methyltransferase	AKB54510.1	9.20903	6.81671	8.75453	3.46237	7.67737	6.34244	9.77207	8.97897	7.74154	2.83776	7.4046	4.48997	6.42503	1.86226	8.77407	6.5511
methylase] [protein_id=AKB54511.1	1463	methylase	AKB54511.1	4.62847	1.04833	4.13294	4.24962	3.56787	4.63026	5.33445	7.35292	3.40032	5.12795	3.79144	4.09713	3.3874	1.2768	4.31254	0.487777
hypothetical protein] [protein_id=AKB54512.1	1464	hypothetical protein	AKB54512.1	114.098	66.2356	117.392	27.3777	121.633	4.19023	122.06	12.3229	123.344	23.1996	110.139	2.42092	127.671	19.2014	110.212	30.8115
Phospholipid-binding protein] [protein_id=AKB54513.1	1465	Phospholipid-binding protein	AKB54513.1	119.51	5.98269	120.201	10.231	129.586	12.3935	169.448	25.2875	95.1237	4.56116	115.14	7.699	94.9919	20.7436	96.4335	5.40244
Peptide methionine sulfoxide reductase MsrA] [protein_id=AKB54514.1	1466	Peptide methionine sulfoxide reductase MsrA	AKB54514.1	26.8033	6.80376	22.3611	7.55706	43.8655	3.86997	58.6968	18.7888	28.5382	3.69178	33.0725	6.414	23.8748	9.23631	18.4374	0.805157
hypothetical protein] [protein_id=AKB54515.1	1467	hypothetical protein	AKB54515.1	10.2604	6.29121	10.0239	1.99955	14.3596	3.65971	11.898	5.63646	6.02675	0.498699	11.2243	4.88937	5.69039	1.46135	9.43499	6.79905
hypothetical protein] [protein_id=AKB54516.1	1468	hypothetical protein	AKB54516.1	8.55247	3.38977	9.76412	5.16529	11.9696	4.18893	7.75223	2.70915	5.94424	3.71722	8.04401	2.36308	8.37825	3.77722	6.39536	2.32777
2,4-dienoyl-CoA reductase [NADPH]] [protein_id=AKB54517.1	1469	2,4-dienoyl-CoA reductase [NADPH]	AKB54517.1	22.7411	6.71469	17.6412	1.58623	16.0169	4.94644	19.4665	7.45564	22.0958	5.8863	17.4406	8.7126	17.5124	8.18055	16.0816	9.93549
hypothetical protein] [protein_id=AKB54518.1	1470	hypothetical protein	AKB54518.1	4947.69	695.583	4464.8	646.215	4614.75	115.552	4570.89	612.678	3421.53	247.198	4552.04	380.041	3928.08	387.695	4611.54	651.219
Transcriptional regulator, MerR family] [protein_id=AKB54519.1	1471	Transcriptional regulator, MerR family	AKB54519.1	59.6355	20.2931	70.4642	2.64766	66.9818	0.696316	66.1394	20.2672	62.0841	6.71837	66.9384	17.1014	53.6468	7.58644	65.6109	6.24563
hypothetical protein] [protein_id=AKB54520.1	1472	hypothetical protein	AKB54520.1	55.6406	15.5413	89.0778	13.9115	80.175	15.8083	79.5268	16.6631	75.9833	22.1741	93.7328	11.0364	67.6853	22.1837	76.1963	15.9158
Long-chain-fatty-acid--CoA ligase] [protein_id=AKB54521.1	1473	Long-chain-fatty-acid--CoA ligase	AKB54521.1	149.282	18.4732	146.785	14.9449	129.493	10.5718	126.409	36.1321	137.404	16.6564	167.206	22.1985	161.842	25.2716	130.133	18.1995
hypothetical protein] [protein_id=AKB54522.1	1474	hypothetical protein	AKB54522.1	44.5436	14.148	37.1699	3.42292	41.351	7.08982	37.2255	11.4957	37.3335	7.28495	33.5896	3.01256	29.7833	1.11737	29.9121	3.51544
hypothetical protein] [protein_id=AKB54523.1	1475	hypothetical protein	AKB54523.1	160.225	33.1734	124.18	29.5366	94.2857	25.7079	98.0126	8.10691	112.732	50.5079	127.006	31.2222	87.2149	42.5578	95.7299	33.6096
Putative snRNP Sm-like protein, Archaeal] [protein_id=AKB54524.1	1476	Putative snRNP Sm-like protein, Archaeal	AKB54524.1	77.1382	31.7525	73.2921	11.8995	62.4496	9.55378	58.794	5.10599	63.9409	24.0652	70.0741	13.9107	73.8226	9.28411	76.38	4.60982
hypothetical protein] [protein_id=AKB54525.1	1477	hypothetical protein	AKB54525.1	26.7061	4.95266	34.5253	20.5228	45.8801	2.2457	31.9391	10.9351	24.8017	10.0034	36.2391	19.084	29.4749	10.4729	27.7851	7.6354
Putative ski2-type helicase] [protein_id=AKB54526.1	1478	Putative ski2-type helicase	AKB54526.1	91.5042	20.0384	92.7291	6.18235	129.976	7.91823	117.057	8.43607	143.724	27.5868	99.7891	16.4906	137.439	23.6892	127.125	13.0634
cell surface protein] [protein_id=AKB54527.1	1479	cell surface protein	AKB54527.1	9.94595	1.48573	7.35527	5.18736	7.08897	3.05324	5.18356	2.7406	9.37679	0.491537	9.87586	2.3196	5.42898	3.34424	7.89923	2.75127
cell surface protein] [protein_id=AKB54528.1	1480	cell surface protein	AKB54528.1	14.119	6.9541	9.79636	1.01963	10.9187	2.5712	13.6518	2.8545	10.5142	3.72105	12.2878	6.4269	13.8818	6.41426	16.2801	3.06719
Chitin binding protein] [protein_id=AKB54529.1	1481	Chitin binding protein	AKB54529.1	18.8696	1.53506	21.7098	3.64142	19.2129	2.30132	23.7612	2.22342	25.9976	7.19174	23.1136	2.00689	19.4162	11.6371	14.0147	9.77874
putative NTPase] [protein_id=AKB54530.1	1482	putative NTPase	AKB54530.1	5.27799	2.68583	9.44195	7.46524	8.15531	2.71569	9.24478	7.22998	4.17014	2.99961	2.58342	1.48252	4.26559	2.86552	7.96148	5.16419
Pyridoxamine 5'-phosphate oxidase] [protein_id=AKB54531.1	1483	Pyridoxamine 5'-phosphate oxidase	AKB54531.1	30.4525	9.65766	37.7583	12.5655	31.0983	12.2515	25.9042	3.31196	24.6921	6.09014	36.0259	12.2795	33.6703	12.376	21.0364	12.3715
Transcriptional regulator, TrmB family] [protein_id=AKB54532.1	1484	Transcriptional regulator, TrmB family	AKB54532.1	7.51927	3.4877	9.30801	6.16073	8.33301	2.70412	7.64094	2.79172	6.41147	1.49621	9.88816	4.64875	5.30299	1.87855	7.76299	1.87556
Methyltransferase] [protein_id=AKB54533.1	1485	Methyltransferase	AKB54533.1	4.16747	1.83195	5.49926	3.63727	2.6489	1.73581	3.83864	2.99263	4.73968	2.76047	7.07034	2.24404	4.31385	1.31727	6.31128	6.16257
Methyltransferase] [protein_id=AKB54534.1	1486	Methyltransferase	AKB54534.1	10.9018	6.29716	11.2273	3.80766	6.08387	3.31399	16.4527	10.5818	8.27904	2.85039	12.742	3.91222	6.77039	3.58095	7.95458	0.943206
Pyridoxine biosynthesis glutamine amidotransferase, glutaminase subunit] [protein_id=AKB54535.1	1487	Pyridoxine biosynthesis glutamine amidotransferase, glutaminase subunit	AKB54535.1	156.802	7.94395	137.707	4.44753	144.885	27.5327	160.42	45.0238	147.656	12.8337	156.604	12.1515	148.769	15.1539	133.415	15.9911
Pyridoxine biosynthesis glutamine amidotransferase, synthase subunit] [protein_id=AKB54536.1	1488	Pyridoxine biosynthesis glutamine amidotransferase, synthase subunit	AKB54536.1	849.457	133.576	918.811	81.1856	732.734	120.934	886.997	150.9	822.015	25.1769	1035.21	180.889	856.395	242.876	748.849	20.6719
Phosphatidylglycerophosphatase B] [protein_id=AKB54537.1	1489	Phosphatidylglycerophosphatase B	AKB54537.1	15.9539	3.70941	25.7122	7.45391	24.1826	2.69722	22.0654	6.4304	14.1285	2.14267	29.0388	7.81267	19.2205	1.544	12.4912	7.44577
Methyltransferase corrinoid activation protein] [protein_id=AKB54538.1	1490	Methyltransferase corrinoid activation protein	AKB54538.1	48.3577	3.32586	47.2284	5.98239	60.622	20.9723	63.4018	19.0922	49.9244	7.39087	58.9534	11.2507	47.0519	16.4557	41.4017	19.9861
Methylthiol:coenzyme M methyltransferase corrinoid protein] [protein_id=AKB54539.1	1491	Methylthiol:coenzyme M methyltransferase corrinoid protein	AKB54539.1	81.5922	12.1788	142.656	20.0535	192.69	8.45067	143.219	41.4502	116.396	34.9531	167.15	37.719	126.917	67.3257	68.4861	6.83259
Methylcobalamin:coenzyme M methyltransferase, methanol-specific] [protein_id=AKB54540.1	1492	Methylcobalamin:coenzyme M methyltransferase, methanol-specific	AKB54540.1	155.181	23.2348	267.001	44.9655	290.538	126.695	252.803	82.6501	185.067	49.6426	299.465	60.2123	210.174	126.369	143.236	29.8116
Methylthiol:coenzyme M methyltransferase corrinoid protein] [protein_id=AKB54541.1	1493	Methylthiol:coenzyme M methyltransferase corrinoid protein	AKB54541.1	37.2764	13.6754	57.7424	7.64362	81.6137	3.08634	67.0866	19.4437	51.6666	14.9739	73.169	20.938	63.3182	29.9505	29.6562	6.06753
Methylcobalamin:coenzyme M methyltransferase, methanol-specific] [protein_id=AKB54542.1	1494	Methylcobalamin:coenzyme M methyltransferase, methanol-specific	AKB54542.1	71.3506	4.79007	145.316	21.9391	139.606	61.9873	110.137	43.2137	77.5077	20.7993	137.141	27.6873	90.9828	57.3932	68.8531	20.8483
hypothetical protein] [protein_id=AKB54543.1	1495	hypothetical protein	AKB54543.1	6.15063	3.76729	5.20742	0.561181	8.64217	2.27713	10.0068	8.3176	7.04076	2.89448	4.19642	1.51143	2.49417	1.4218	8.70168	8.53291
putative IS1648 transposase] [protein_id=AKB54544.1	1496	putative IS1648 transposase	AKB54544.1	6.65815	5.09275	3.64499	3.52065	5.74883	1.97044	4.42752	3.40954	1.37887	1.36058	5.55949	4.07029	3.06772	1.82919	3.78891	1.25287
Chitin binding protein] [protein_id=AKB54545.1	1497	Chitin binding protein	AKB54545.1	353.26	45.7337	415.558	101.044	271.935	30.5822	336.203	13.5449	438.487	20.3722	322.705	25.5764	345.813	11.7297	336.691	24.6566
hypothetical protein] [protein_id=AKB54546.1	1498	hypothetical protein	AKB54546.1	4947.69	695.583	4464.8	646.215	4615.05	116.001	4570.89	612.678	3421.53	247.198	4552.04	380.041	3928.08	387.695	4611.54	651.219
hypothetical protein] [protein_id=AKB54547.1	1499	hypothetical protein	AKB54547.1	21.1291	5.47046	17.769	4.45597	12.0353	5.42524	7.65429	2.76452	20.1922	4.94415	16.6625	6.18757	13.255	6.83155	19.2957	11.5368
F420H2 dehydrogenase subunit FpoO] [protein_id=AKB54548.1	1500	F420H2 dehydrogenase subunit FpoO	AKB54548.1	4.55361	0.379171	5.85796	1.95075	2.95457	1.08048	2.99578	3.2654	5.33648	2.47245	4.19414	2.02972	4.80465	3.22408	4.45358	3.10845
NADH:ubiquinone oxidoreductase subunit N] [protein_id=AKB54549.1	1501	NADH:ubiquinone oxidoreductase subunit N	AKB54549.1	21.7949	11.0197	36.2938	12.4992	26.8245	15.0254	32.7312	1.32164	31.0525	22.5533	27.539	5.95366	20.2956	5.75818	26.4659	11.1219
hypothetical protein] [protein_id=AKB54550.1	1502	hypothetical protein	AKB54550.1	22.9202	17.64	9.95977	3.56412	10.7012	1.82639	21.2435	16.1617	28.7576	7.00507	18.5392	5.61619	17.5996	4.81168	19.3245	6.38207
hypothetical protein] [protein_id=AKB54551.1	1503	hypothetical protein	AKB54551.1	28.1709	4.11655	41.4324	2.60161	22.9242	5.32515	32.2309	11.1469	38.4842	6.51032	42.3405	6.13854	38.2693	2.46239	40.0517	5.87211
NADH:ubiquinone oxidoreductase subunit K] [protein_id=AKB54552.1	1504	NADH:ubiquinone oxidoreductase subunit K	AKB54552.1	9.87603	2.55654	10.4149	6.27571	13.7314	4.17035	11.4432	4.488	16.0432	4.71575	9.34095	5.31147	10.9752	3.81174	7.61776	5.91205
NADH:ubiquinone oxidoreductase subunit J] [protein_id=AKB54553.1	1505	NADH:ubiquinone oxidoreductase subunit J	AKB54553.1	2.80689	1.65038	2.89604	1.66257	1.67765	1.64391	3.19883	1.37956	4.72582	0.1868	4.47917	1.13988	3.53346	1.39853	3.02314	1.40231
NADH dehydrogenase subunit J] [protein_id=AKB54554.1	1506	NADH dehydrogenase subunit J	AKB54554.1	14.1963	7.78926	9.60054	3.09529	9.11858	2.95142	10.5954	5.79418	12.6443	11.3816	11.7579	5.39566	10.737	4.94145	9.34508	0.366796
hypothetical protein] [protein_id=AKB54555.1	1507	hypothetical protein	AKB54555.1	13.288	6.98041	8.00738	1.67388	8.89953	3.81983	12.9116	1.56657	11.1954	5.37163	5.03779	1.89881	5.71544	3.80705	7.62093	5.39016
FPO subunit H] [protein_id=AKB54556.1	1508	FPO subunit H	AKB54556.1	22.1651	9.30908	21.8401	1.98991	13.0807	2.29194	12.8935	4.08955	16.4201	11.0424	17.104	9.34379	18.4583	5.72824	18.465	5.24899
NADH-quinone oxidoreductase subunit C/D] [protein_id=AKB54557.1	1509	NADH-quinone oxidoreductase subunit C/D	AKB54557.1	42.1878	8.33233	40.7811	2.46193	47.7391	16.1825	42.8468	5.46212	50.9577	5.32302	32.6989	8.65303	36.0365	12.1124	49.632	4.99895
NADH-quinone oxidoreductase subunit C/D] [protein_id=AKB54558.1	1510	NADH-quinone oxidoreductase subunit C/D	AKB54558.1	16.6625	7.35025	17.9375	9.96715	19.4847	2.99495	14.5392	8.82014	14.3715	3.99249	11.3183	3.17657	15.6062	3.98052	16.1513	3.94744
putative membrane-bound hydrogenase subunit mbhJ] [protein_id=AKB54559.1	1511	putative membrane-bound hydrogenase subunit mbhJ	AKB54559.1	27.9681	10.6602	37.3629	3.60652	41.3783	10.7005	53.323	15.1287	39.8006	5.10001	36.3851	6.60416	23.5771	6.66142	27.2849	9.78929
hypothetical protein] [protein_id=AKB54560.1	1512	hypothetical protein	AKB54560.1	10.6241	7.65956	13.5732	4.63701	14.8943	6.33951	15.3689	5.22375	14.11	5.85377	7.64358	0.891423	10.112	3.19501	15.3371	2.06194
hypothetical protein] [protein_id=AKB54561.1	1513	hypothetical protein	AKB54561.1	7.00581	2.90595	5.56728	3.90635	6.05002	2.94282	5.87161	1.87755	2.67072	2.74023	4.85268	2.47073	7.08196	2.26795	1.67363	2.89881
Ferredoxin] [protein_id=AKB54562.1	1514	Ferredoxin	AKB54562.1	15.9431	7.40992	18.7162	3.33613	8.40221	0.608449	12.6551	6.08241	18.3532	7.51905	15.6269	2.86255	23.7595	11.5082	20.7474	5.50698
putative oxidoreductase] [protein_id=AKB54563.1	1515	putative oxidoreductase	AKB54563.1	139.139	22.1471	161.151	31.3857	112.766	10.7009	108.068	6.2927	212.766	13.436	136.602	16.3994	189.279	30.918	179.065	32.9777
7,8-didemethyl-8-hydroxy-5-deazariboflavin synthase subunit 1] [protein_id=AKB54564.1	1516	7,8-didemethyl-8-hydroxy-5-deazariboflavin synthase subunit 1	AKB54564.1	66.7261	27.3793	65.8088	5.38824	59.0703	16.5227	55.722	6.98741	105.381	12.0579	63.287	12.6037	81.3754	30.281	84.9306	2.99795
7,8-didemethyl-8-hydroxy-5-deazariboflavin synthase subunit 2] [protein_id=AKB54565.1	1517	7,8-didemethyl-8-hydroxy-5-deazariboflavin synthase subunit 2	AKB54565.1	235.988	63.2785	293.309	25.9359	257.739	43.2297	239.03	24.8415	319.95	7.87863	290.518	15.0531	310.654	32.3371	287.507	35.4105
7,8-didemethyl-8-hydroxy-5-deazariboflavin synthase subunit 2] [protein_id=AKB54566.1	1518	7,8-didemethyl-8-hydroxy-5-deazariboflavin synthase subunit 2	AKB54566.1	166.945	15.3977	171.436	26.0124	148.443	1.39535	131.771	13.7669	189.894	12.1044	182.913	11.891	182.705	13.3838	163.143	4.27589
2-phospho-L-lactate guanylyltransferase] [protein_id=AKB54567.1	1519	2-phospho-L-lactate guanylyltransferase	AKB54567.1	29.8648	6.44538	37.5618	16.4857	42.5457	11.524	18.0889	6.06268	37.9605	3.14872	42.3546	6.56801	46.6476	3.8117	37.8332	5.1344
Large-conductance mechanosensitive channel] [protein_id=AKB54568.1	1520	Large-conductance mechanosensitive channel	AKB54568.1	13.0138	1.17805	9.21134	4.59754	15.2283	2.36145	11.1578	5.79139	7.23608	3.31895	9.44948	3.24707	9.01259	1.34764	9.44991	3.09807
Exodeoxyribonuclease III] [protein_id=AKB54569.1	1521	Exodeoxyribonuclease III	AKB54569.1	8.93166	5.49395	7.61696	3.45841	8.18317	1.98431	7.67852	5.61836	9.74764	4.35654	8.19219	2.43518	7.73134	2.16308	9.6979	0.658653
Phosphomethylpyrimidine kinase] [protein_id=AKB54570.1	1522	Phosphomethylpyrimidine kinase	AKB54570.1	5.12235	3.02199	3.12445	0.336709	5.86683	2.00347	3.83147	2.53397	6.26636	2.07619	3.4157	0.47683	3.69204	0.620128	4.1465	3.2407
hypothetical protein] [protein_id=AKB54571.1	1523	hypothetical protein	AKB54571.1	47.3074	2.43251	33.8794	7.93091	34.2774	5.06164	31.9489	5.9415	34.221	5.52709	35.5018	10.0076	32.1671	6.2136	20.2797	6.7881
Mobile element protein] [protein_id=AKB54572.1	1524	Mobile element protein	AKB54572.1	4.2787	0.851504	8.36475	3.94906	12.6546	2.73375	12.8025	9.31774	6.7811	1.30541	8.29297	3.30734	7.28069	6.70809	5.05061	6.74774
DNA topoisomerase I] [protein_id=AKB54573.1	1525	DNA topoisomerase I	AKB54573.1	359.411	85.6628	383.151	82.5872	380.064	39.4909	503.918	97.5328	483.732	28.3138	371.648	60.0332	531.998	102.377	481.983	68.4202
hypothetical protein] [protein_id=AKB54574.1	1526	hypothetical protein	AKB54574.1	7.13559	4.50837	10.2198	6.49374	12.678	1.59443	13.8489	1.5967	8.86205	3.4695	10.0957	4.27896	22.9897	8.39106	18.5316	9.27546
Ribosome biogenesis protein TSR3] [protein_id=AKB54575.1	1527	Ribosome biogenesis protein TSR3	AKB54575.1	39.6898	25.8837	28.151	13.1446	37.2992	7.47501	40.5613	13.2601	36.3667	2.58035	36.9073	10.2204	33.8163	11.3834	43.9396	8.91364
putative membrane protein] [protein_id=AKB54576.1	1528	putative membrane protein	AKB54576.1	10.5227	6.11883	11.5192	6.13213	27.2895	6.53384	21.6666	11.2237	15.7473	4.45998	13.0403	3.45197	14.068	5.66968	15.7692	4.31419
hypothetical protein] [protein_id=AKB54577.1	1529	hypothetical protein	AKB54577.1	11.7396	1.26231	8.13611	2.02879	10.3228	5.78116	20.8757	7.48784	12.7115	5.6276	7.42376	2.2768	8.15133	3.41656	7.89072	0.330494
transmembrane efflux protein] [protein_id=AKB54578.1	1530	transmembrane efflux protein	AKB54578.1	43.4694	12.7574	14.9409	3.98533	34.5866	2.90644	31.1724	2.75976	24.704	5.66142	28.5447	19.8905	36.9554	18.5751	31.1793	11.4635
Transcriptional regulator, ArsR family] [protein_id=AKB54579.1	1531	Transcriptional regulator, ArsR family	AKB54579.1	30.8238	9.1188	27.4387	3.4995	31.9382	4.10017	33.3359	2.26757	24.4599	4.62896	26.527	0.583668	23.1646	4.06334	27.3716	5.19614
Fumarate hydratase class I, aerobic] [protein_id=AKB54580.1	1532	Fumarate hydratase class I, aerobic	AKB54580.1	14.0358	11.9897	22.982	11.7991	19.1098	1.83983	24.1926	11.492	17.68	5.79278	11.1446	1.62477	19.3378	7.4842	22.5924	7.12199
Fumarate hydratase class I, aerobic] [protein_id=AKB54581.1	1533	Fumarate hydratase class I, aerobic	AKB54581.1	23.1259	4.4596	27.6957	6.85169	39.6006	10.0598	28.3668	9.87257	28.4667	8.3846	26.1422	3.41344	39.9217	11.9884	42.1867	4.54247
TPR domain protein, putative component of TonB system] [protein_id=AKB54582.1	1534	TPR domain protein, putative component of TonB system	AKB54582.1	16.4296	8.6944	18.2945	7.48499	14.8803	4.87755	12.3672	4.46901	23.6843	4.72593	11.0223	2.17265	25.0231	15.8025	24.902	14.0927
hypothetical protein] [protein_id=AKB54583.1	1535	hypothetical protein	AKB54583.1	7.69034	6.42045	12.8564	1.02028	8.00349	5.08109	7.24547	4.72858	7.92327	2.37957	10.8125	2.83243	6.66196	1.23573	9.59678	4.2035
phosphorylase] [protein_id=AKB54584.1	1536	phosphorylase	AKB54584.1	15.9735	7.81827	16.599	4.47228	12.8278	2.70382	13.0832	4.36199	15.2539	2.52136	16.7825	4.047	12.4532	6.63336	14.0711	8.66734
phosphorylase] [protein_id=AKB54585.1	1537	phosphorylase	AKB54585.1	15.3467	3.1033	18.0293	12.9393	16.0074	5.55516	18.2811	8.98814	10.5494	2.66119	27.2225	3.80872	16.5032	7.81213	11.769	6.69708
Mobile element protein] [protein_id=AKB54586.1	1538	Mobile element protein	AKB54586.1	18.1137	6.37808	16.3385	9.56406	15.1119	3.0548	18.3924	8.83764	12.3745	7.87105	21.6607	5.37785	17.2429	6.67067	17.4678	6.71061
Xanthine-guanine phosphoribosyltransferase] [protein_id=AKB54587.1	1539	Xanthine-guanine phosphoribosyltransferase	AKB54587.1	43.2084	10.3874	24.7313	11.3051	36.1363	5.3227	31.9742	6.10407	25.0733	5.07019	30.966	8.35761	22.8719	4.25805	24.4304	4.66348
hypothetical protein] [protein_id=AKB54588.1	1540	hypothetical protein	AKB54588.1	69.8806	11.9709	72.8815	24.3458	66.7269	14.7166	62.2735	20.7598	71.7946	8.62262	53.4527	12.3632	57.3814	11.5698	51.3073	16.4458
Pyruvate:ferredoxin oxidoreductase, beta subunit] [protein_id=AKB54589.1	1541	Pyruvate:ferredoxin oxidoreductase, beta subunit	AKB54589.1	81.4048	37.3105	102.164	7.83553	123.363	7.18418	142.574	8.01833	103.095	12.4743	98.6046	5.40227	92.1713	7.22279	101.782	15.2137
Mobile element protein] [protein_id=AKB54590.1	1542	Mobile element protein	AKB54590.1	0.921982	1.59692	0.813367	0.745395	0.893588	0.8916	0	0	0.676415	0.210587	0.487951	0.845156	1.74386	2.20863	1.08718	0.324166
ABC transporter ATP-binding protein] [protein_id=AKB54591.1	1543	ABC transporter ATP-binding protein	AKB54591.1	26.0887	23.6332	31.0447	14.0471	21.4367	1.51314	32.4154	7.32469	23.5816	4.92505	31.4603	12.8152	23.2116	6.7948	15.4627	6.24408
hypothetical protein] [protein_id=AKB54592.1	1544	hypothetical protein	AKB54592.1	3.59069	4.26009	2.53856	2.36674	2.68276	2.36349	3.81688	0.752395	2.52394	1.72309	2.52505	1.9322	2.06354	1.87409	5.36086	5.98787
hypothetical protein] [protein_id=AKB54593.1	1545	hypothetical protein	AKB54593.1	17.0955	5.69725	18.9096	3.9149	17.3227	1.4172	15.8153	3.46655	15.06	1.88761	14.5502	2.70536	17.0655	4.87275	16.7074	2.05583
hypothetical protein] [protein_id=AKB54594.1	1546	hypothetical protein	AKB54594.1	8.15481	0.508515	2.99392	1.07376	6.1491	3.39584	7.74258	0.481676	7.52159	1.64014	4.2548	0.514644	1.96574	1.62008	5.71633	5.18394
Multi antimicrobial extrusion protein (Na(+)/drug antiporter), MATE family of MDR efflux pumps] [protein_id=AKB54595.1	1547	Multi antimicrobial extrusion protein (Na(+)/drug antiporter), MATE family of MDR efflux pumps	AKB54595.1	87.2651	6.182	105.031	8.95942	80.7206	6.00587	82.1607	4.95637	109.272	24.5884	94.9905	1.73514	92.5405	4.95134	110.445	20.9898
tRNA pseudouridine 13 synthase] [protein_id=AKB54596.1	1548	tRNA pseudouridine 13 synthase	AKB54596.1	93.1157	20.589	78.4407	3.1898	77.3991	31.1496	76.7568	11.2547	98.3417	11.86	67.1076	14.1241	90.559	34.4223	101.063	20.7668
hypothetical protein] [protein_id=AKB54597.1	1549	hypothetical protein	AKB54597.1	70.741	12.1405	66.9831	14.5761	63.7175	3.80398	72.0481	11.2943	82.4414	7.94625	65.6607	15.2795	109.079	44.0537	105.768	32.9317
Peptidyl-tRNA hydrolase, archaeal type] [protein_id=AKB54598.1	1550	Peptidyl-tRNA hydrolase, archaeal type	AKB54598.1	38.0361	7.22383	42.7407	13.949	49.9668	14.6499	43.3642	3.60669	62.495	9.40186	32.9749	2.55756	60.8046	26.3098	64.469	13.5443
Tetrahydromethanopterin:alpha-L-glutamate ligase] [protein_id=AKB54599.1	1551	Tetrahydromethanopterin:alpha-L-glutamate ligase	AKB54599.1	35.6283	9.93896	46.5373	15.6666	38.9455	9.18637	42.0134	2.05643	42.7139	3.64959	61.2381	6.20421	49.3242	15.5489	38.0354	5.40797
scaffold protein] [protein_id=AKB54600.1	1552	scaffold protein	AKB54600.1	3.82923	2.12195	2.01768	2.05013	6.87888	3.33456	6.40013	0.916628	3.41721	1.79882	2.96468	2.591	4.57527	3.46633	4.01878	3.46335
Cysteine desulfurase] [protein_id=AKB54601.1	1553	Cysteine desulfurase	AKB54601.1	43.4092	5.57339	25.9123	10.6916	37.2464	10.3168	29.4661	7.16913	26.0627	4.99417	20.1554	5.04502	36.2885	12.5349	38.7198	10.6232
Antiholin-like protein LrgA] [protein_id=AKB54602.1	1554	Antiholin-like protein LrgA	AKB54602.1	85.6091	59.6948	82.6227	50.9315	64.5374	5.4767	68.5861	14.7039	59.4198	5.79188	128.951	11.1558	72.6736	43.2771	71.5922	14.3236
LrgA-associated membrane protein LrgB] [protein_id=AKB54603.1	1555	LrgA-associated membrane protein LrgB	AKB54603.1	147.962	52.2797	143.322	55.4264	134.719	17.689	133.937	28.5153	123.493	26.89	216.323	13.7045	154.873	67.007	132.393	25.9003
FxsA protein] [protein_id=AKB54604.1	1556	FxsA protein	AKB54604.1	35.9214	10.8388	24.246	5.64513	23.078	4.70636	25.4821	3.06924	25.8921	3.85077	28.1993	6.09083	19.6945	11.946	24.9301	16.6171
cellulose synthase subunit BcsC] [protein_id=AKB54605.1	1557	cellulose synthase subunit BcsC	AKB54605.1	37.3446	8.41669	38.9875	11.381	57.9235	14.8493	48.2392	11.6948	35.299	8.17115	41.878	8.36411	30.8056	5.93716	37.1014	15.0345
Serine/threonine protein phosphatase BSU1] [protein_id=AKB54606.1	1558	Serine/threonine protein phosphatase BSU1	AKB54606.1	12.5786	6.47719	18.0633	1.28049	11.3966	2.1495	15.779	3.19869	12.0672	8.04236	17.2445	3.22438	12.2245	6.03161	11.8132	3.01787
hypothetical protein] [protein_id=AKB54607.1	1559	hypothetical protein	AKB54607.1	6.57424	5.17945	8.39554	7.08148	9.53975	3.65164	8.73534	6.36923	10.3829	2.19144	11.8769	4.34578	5.38637	5.3115	5.84032	3.91029
Mobile element protein] [protein_id=AKB54608.1	1560	Mobile element protein	AKB54608.1	121.812	11.4708	111.506	3.15827	118.541	20.7895	103.14	36.2629	96.6696	9.04432	105.961	9.49245	103.612	8.97929	96.4554	30.0518
Aldo/keto reductase] [protein_id=AKB54609.1	1561	Aldo/keto reductase	AKB54609.1	12.5888	6.43887	6.96375	3.73342	13.0937	4.88137	14.7897	6.47198	9.81817	2.31415	8.51962	2.30211	9.74472	2.19814	9.87352	5.37047
hypothetical protein] [protein_id=AKB54610.1	1562	hypothetical protein	AKB54610.1	133.285	24.1362	83.2569	16.5368	75.9037	22.3939	78.4067	8.71563	76.6984	4.35	95.3144	9.28741	99.5297	9.68371	80.4478	11.3498
Aldo/keto reductase] [protein_id=AKB54611.1	1563	Aldo/keto reductase	AKB54611.1	66.7414	8.1636	54.5764	30.3082	69.1568	14.5491	70.2046	1.73249	61.1282	8.44189	60.7507	15.6719	56.8788	8.76051	43.7896	9.253
flavoredoxin Flr] [protein_id=AKB54612.1	1564	flavoredoxin Flr	AKB54612.1	17.9889	5.17962	23.8269	5.69919	24.0159	7.98682	19.0901	11.5085	21.9095	4.25513	25.1877	3.05223	17.9882	8.44415	14.9364	2.04212
hypothetical protein] [protein_id=AKB54613.1	1565	hypothetical protein	AKB54613.1	29.7498	9.69676	30.3124	25.0923	38.8116	17.5464	32.2391	3.18427	31.3691	6.09015	20.2799	9.9635	29.6598	2.21922	23.9904	6.74333
hypothetical protein] [protein_id=AKB54614.1	1566	hypothetical protein	AKB54614.1	114.306	36.7836	76.5236	19.9637	110.398	40.1693	115.285	22.7074	107.543	19.911	70.3264	11.6553	62.6951	9.91459	73.6707	19.9262
hypothetical protein] [protein_id=AKB54615.1	1567	hypothetical protein	AKB54615.1	1.59354	1.56632	3.58045	3.94525	0.897578	1.55465	1.22992	1.40724	3.75003	3.03227	0.32196	0.557651	2.18449	3.3365	3.89854	2.20361
hypothetical protein] [protein_id=AKB54616.1	1568	hypothetical protein	AKB54616.1	20.1581	7.34731	9.04794	1.38247	23.3154	10.1913	25.9512	9.71836	14.0945	8.25687	10.5713	0.0464562	8.48417	1.88099	11.8153	5.303
hypothetical protein] [protein_id=AKB54617.1	1569	hypothetical protein	AKB54617.1	153.964	41.8365	134.174	64.3654	94.8075	14.8561	122.805	9.91517	154.579	10.2317	81.151	25.5399	85.8941	22.4682	97.0656	15.047
hypothetical protein] [protein_id=AKB54618.1	1570	hypothetical protein	AKB54618.1	43.3679	21.1008	20.6965	16.0291	19.1486	8.38008	22.8624	9.70453	13.2935	2.46841	25.3792	13.0503	20.6077	5.23015	21.1604	8.59646
Zinc metalloprotease] [protein_id=AKB54619.1	1571	Zinc metalloprotease	AKB54619.1	23.1744	9.47322	30.7574	7.38643	17.8743	6.29029	27.1052	10.8149	14.55	1.31237	29.1966	6.81387	26.5871	1.55638	20.234	5.9819
Glycogen phosphorylase] [protein_id=AKB54620.1	1572	Glycogen phosphorylase	AKB54620.1	63.8412	12.6945	44.0401	10.0459	48.0372	8.27164	31.3017	3.17808	47.2119	11.3142	43.5472	10.251	48.1282	4.01823	40.8718	8.62685
Sensory transduction histidine kinase] [protein_id=AKB54621.1	1573	Sensory transduction histidine kinase	AKB54621.1	112.093	19.3609	131.067	3.19677	97.4274	19.0821	116.731	16.1748	103.947	15.035	127.927	18.1667	91.6278	18.4827	120.542	42.6686
Sensory transduction histidine kinase] [protein_id=AKB54622.1	1574	Sensory transduction histidine kinase	AKB54622.1	68.8823	10.5457	94.0928	14.0833	62.8996	18.2395	89.1596	10.4345	73.2359	8.41607	85.7823	5.68672	59.1573	20.7269	76.7858	33.9687
Putative heme iron utilization protein] [protein_id=AKB54623.1	1575	Putative heme iron utilization protein	AKB54623.1	29.9988	7.97231	18.7144	1.00625	35.8625	10.0896	32.0469	5.16321	27.7368	5.83795	18.2013	5.27944	26.0104	3.05363	21.8905	6.38092
Secreted and surface protein containing fasciclin-like repeats] [protein_id=AKB54624.1	1576	Secreted and surface protein containing fasciclin-like repeats	AKB54624.1	12.5563	3.25932	14.4847	2.69854	15.2562	6.16781	23.4046	12.5909	8.80435	2.89	6.63845	5.68198	8.49858	4.92434	8.03176	3.49604
Secreted and surface protein containing fasciclin-like repeats] [protein_id=AKB54625.1	1577	Secreted and surface protein containing fasciclin-like repeats	AKB54625.1	70.2342	35.8514	70.3387	9.44059	69.1737	3.47997	79.3534	10.3031	82.5596	14.496	55.2261	15.6088	53.7233	14.5952	63.8984	5.82714
hypothetical protein] [protein_id=AKB54626.1	1578	hypothetical protein	AKB54626.1	17.4383	7.65625	11.976	3.64957	9.83942	2.36811	9.99937	3.55236	14.0065	2.01011	11.223	2.40005	7.11267	3.91149	6.35332	4.00716
pyridoxamine 5'-phosphate oxidase, FMN-binding family] [protein_id=AKB54627.1	1579	pyridoxamine 5'-phosphate oxidase, FMN-binding family	AKB54627.1	170.319	39.806	144.259	30.1985	108.393	10.4426	106.495	11.3152	192.198	37.9337	202.593	88.9673	193.458	81.1775	123.65	26.9587
hypothetical protein] [protein_id=AKB54628.1	1580	hypothetical protein	AKB54628.1	38.4594	13.5912	38.8293	7.33035	28.0258	4.13005	32.5997	11.8312	52.0051	4.28537	55.7043	27.0119	70.3939	18.8629	42.8514	5.5843
hypothetical protein] [protein_id=AKB54629.1	1581	hypothetical protein	AKB54629.1	23.042	6.61667	35.8018	5.37343	34.2411	1.92244	29.8927	9.82306	27.1835	5.38024	33.1993	3.12778	25.2387	7.32707	34.7754	16.3994
sensory transduction histidine kinase] [protein_id=AKB54630.1	1582	sensory transduction histidine kinase	AKB54630.1	1.36059	1.72372	0.0975902	0.169031	1.19278	1.033	0.836926	1.4496	4.43263	3.91749	0.417274	0.491499	0.65441	0.567184	0.623681	0.54447
hypothetical protein] [protein_id=AKB54631.1	1583	hypothetical protein	AKB54631.1	56.9511	5.7857	30.3319	13.8652	42.3969	4.35024	37.644	7.62601	35.019	13.2839	43.9074	2.31587	39.7117	3.09458	36.3091	5.51182
Acetyltransferase] [protein_id=AKB54632.1	1584	Acetyltransferase	AKB54632.1	8.69065	0.952673	12.2374	1.46047	12.444	1.6637	8.90374	3.82195	11.2946	3.98415	11.4766	0.836307	8.62771	2.63453	9.69044	3.59398
Pentapeptide repeat family protein] [protein_id=AKB54633.1	1585	Pentapeptide repeat family protein	AKB54633.1	7.58506	4.52444	4.1007	1.54899	5.00708	1.2937	8.91709	5.6292	3.62807	2.67551	6.31106	3.79029	8.9267	4.71193	9.17695	6.63282
hypothetical protein] [protein_id=AKB54634.1	1586	hypothetical protein	AKB54634.1	22.9199	9.67981	20.5679	11.9334	36.6007	12.5789	31.737	9.96905	21.2851	7.00466	23.6453	9.10017	19.4017	8.45551	31.45	10.0661
Pentapeptide repeat family protein] [protein_id=AKB54635.1	1587	Pentapeptide repeat family protein	AKB54635.1	10.8742	12.1152	3.84028	3.43928	8.46344	1.1269	7.35082	2.71813	5.16571	3.29718	6.04293	3.99352	5.28543	2.75134	6.80354	0.652576
Quinolone resistance protein] [protein_id=AKB54636.1	1588	Quinolone resistance protein	AKB54636.1	22.2518	2.92162	13.4718	8.16781	14.9147	5.02682	12.8378	4.73341	9.37969	3.12973	14.9875	6.94065	9.03518	5.23274	8.51064	5.29717
Galactoside O-acetyltransferase] [protein_id=AKB54637.1	1589	Galactoside O-acetyltransferase	AKB54637.1	25.7273	13.4713	18.9397	7.68188	15.4344	5.88911	13.6322	5.65208	20.5252	7.88234	22.9518	8.16744	28.1021	2.89346	23.6738	7.07064
CobN-like chelatase BtuS for metalloporphyrine salvage] [protein_id=AKB54638.1	1590	CobN-like chelatase BtuS for metalloporphyrine salvage	AKB54638.1	88.5123	7.62926	90.3151	10.0342	89.1233	13.1971	98.6481	22.8362	132.749	20.3418	115.146	13.0051	105.033	21.6244	80.6042	12.025
cell surface protein] [protein_id=AKB54639.1	1591	cell surface protein	AKB54639.1	71.2761	9.72358	91.1244	19.8952	81.0791	10.0516	80.9325	15.8251	84.2036	16.4265	84.2194	18.3557	75.505	6.9151	86.4791	8.06873
hypothetical protein] [protein_id=AKB54640.1	1592	hypothetical protein	AKB54640.1	32.6882	7.37724	14.0569	8.79763	16.1388	3.09549	12.1473	9.15297	14.1425	3.90872	16.2038	5.77917	15.2985	7.1012	20.6341	8.65564
cell surface protein] [protein_id=AKB54641.1	1593	cell surface protein	AKB54641.1	513.469	58.9597	660.896	145.536	534.045	34.3454	614.544	86.6226	703.14	36.1243	540.174	27.2887	584.115	35.5384	593.074	29.5409
putative tesA-like protease] [protein_id=AKB54642.1	1594	putative tesA-like protease	AKB54642.1	19.3949	3.0011	15.2629	8.06755	23.5648	4.61652	23.6727	10.0847	13.6414	3.79359	18.7019	7.95923	14.9638	7.28126	17.687	5.08809
hypothetical protein] [protein_id=AKB54643.1	1595	hypothetical protein	AKB54643.1	22.9199	9.67981	20.5679	11.9334	36.6007	12.5789	31.737	9.96905	21.2851	7.00466	23.6453	9.10017	19.4017	8.45551	31.45	10.0661
DNA gyrase subunit A] [protein_id=AKB54644.1	1596	DNA gyrase subunit A	AKB54644.1	350.852	48.8674	485.751	51.7982	377.945	98.0801	394.471	63.601	502.71	92.8519	511.46	82.0862	415.994	151.518	322.715	57.6589
DNA gyrase subunit B] [protein_id=AKB54645.1	1597	DNA gyrase subunit B	AKB54645.1	305.754	51.9475	448.939	27.4407	419.123	56.8922	419.457	50.6498	451.576	61.4735	450.837	26.919	476.921	8.04217	400.12	75.9456
DNA topoisomerase VI subunit A] [protein_id=AKB54646.1	1598	DNA topoisomerase VI subunit A	AKB54646.1	52.5837	15.9978	61.0331	15.4121	73.6963	12.5696	77.6817	21.3935	94.1675	11.7646	50.436	3.17818	89.7962	35.4521	86.4968	31.6009
DNA topoisomerase VI subunit B] [protein_id=AKB54647.1	1599	DNA topoisomerase VI subunit B	AKB54647.1	131.561	12.3726	130.254	5.07607	167.401	21.0959	170.481	40.8561	174.485	15.7777	120.64	19.6	188.851	53.3801	183.494	28.0396
Transcriptional regulator, AsnC family] [protein_id=AKB54648.1	1600	Transcriptional regulator, AsnC family	AKB54648.1	22.0443	7.90186	17.6393	3.61868	32.2971	7.26537	27.8697	8.86945	21.3921	0.894303	20.0591	2.43044	23.1759	7.18823	23.0234	7.12692
hypothetical protein] [protein_id=AKB54649.1	1601	hypothetical protein	AKB54649.1	11.7483	11.3952	8.81929	4.46179	7.7909	1.40335	9.95707	6.12218	4.09671	2.36854	11.9331	4.21001	8.83456	6.75023	6.00904	1.68603
Mg/Co/Ni transporter MgtE] [protein_id=AKB54650.1	1602	Mg/Co/Ni transporter MgtE	AKB54650.1	114.631	47.5709	73.9478	14.1464	89.1856	14.2712	97.9019	25.7676	72.6611	13.7608	73.5105	10.6933	73.1814	9.60281	69.0874	6.68279
Mg/Co/Ni transporter MgtE] [protein_id=AKB54651.1	1603	Mg/Co/Ni transporter MgtE	AKB54651.1	45.2647	7.62839	27.0111	9.61749	32.1612	2.68994	40.2467	10.5988	31.8745	3.47307	38.0169	6.12132	40.6713	7.83375	36.7189	11.1865
Potassium channel protein] [protein_id=AKB54652.1	1604	Potassium channel protein	AKB54652.1	196.987	35.5098	201.222	41.4341	157.818	23.9713	177.313	15.6131	189.498	35.9119	168.556	13.1195	160.075	23.981	130.553	28.8453
hypothetical protein] [protein_id=AKB54653.1	1605	hypothetical protein	AKB54653.1	76.1435	17.846	88.6891	21.2982	70.4282	9.40561	69.1945	10.5002	75.5346	14.5186	81.4011	16.5102	72.6354	5.14269	63.9315	13.5236
hypothetical protein] [protein_id=AKB54654.1	1606	hypothetical protein	AKB54654.1	41.7065	14.4419	47.3505	14.916	51.9287	1.44981	54.4761	8.70069	47.4951	10.6806	61.0903	3.07302	36.145	18.6062	37.6187	11.5517
hypothetical protein] [protein_id=AKB54655.1	1607	hypothetical protein	AKB54655.1	132.854	44.3537	101.835	38.2181	99.5338	8.67685	109.089	10.0935	104.184	18.157	87.9539	4.13682	89.8227	36.0306	54.6332	1.4009
Mobile element protein] [protein_id=AKB54656.1	1608	Mobile element protein	AKB54656.1	6.8806	1.38428	4.03535	4.10026	16.0801	6.4105	6.68329	9.97648	4.60527	2.69042	6.26498	2.22261	4.39661	1.7336	4.89896	3.7761
Mobile element protein] [protein_id=AKB54657.1	1609	Mobile element protein	AKB54657.1	10.2961	6.141	13.6683	3.89751	24.6819	10.9954	28.345	21.2372	1.27799	1.24007	11.3037	5.9216	6.28211	3.86634	12.688	8.83117
Universal stress protein] [protein_id=AKB54658.1	1610	Universal stress protein	AKB54658.1	4.65644	1.69682	4.10215	3.45817	4.22055	4.92121	10.9548	1.65327	4.11966	2.17962	6.63302	4.34093	3.99417	0.812594	3.15672	2.27422
sensory transduction histidine kinase] [protein_id=AKB54659.1	1611	sensory transduction histidine kinase	AKB54659.1	103.695	16.3316	62.7798	9.94211	81.2956	5.51215	58.8763	16.4682	70.0114	15.7411	61.254	8.72058	66.5068	12.3613	64.0778	15.2874
Transposase] [protein_id=AKB54660.1	1612	Transposase	AKB54660.1	11.1939	9.3753	9.82709	7.73207	6.64242	1.12487	8.03517	3.44102	5.8099	0.488563	11.0524	7.06826	6.34983	4.66417	3.45896	3.09445
hypothetical protein] [protein_id=AKB54661.1	1613	hypothetical protein	AKB54661.1	158.662	7.00284	220.119	6.81104	279.373	42.5587	347.287	40.6262	158.822	57.0217	186.834	23.5474	197.815	39.2798	200.104	19.6369
Putative transport protein] [protein_id=AKB54662.1	1614	Putative transport protein	AKB54662.1	21.555	13.3181	15.5868	10.128	18.5916	5.89077	25.488	5.22152	17.5245	7.876	25.117	1.82989	14.5801	9.00514	12.332	6.37974
hypothetical protein] [protein_id=AKB54663.1	1615	hypothetical protein	AKB54663.1	9.29467	14.7067	10.6427	3.4683	9.23706	3.69627	4.34046	3.85639	5.00365	1.22739	7.63903	1.5983	12.1781	3.61232	8.61552	4.12141
Alcohol dehydrogenase] [protein_id=AKB54664.1	1616	Alcohol dehydrogenase	AKB54664.1	198.749	20.305	242.545	17.1307	168.767	9.66411	200.165	28.1246	189.434	31.879	255.743	46.0349	204.67	93.1118	160.95	27.551
Putative glycogen debranching enzyme, archaeal type, TIGR01561] [protein_id=AKB54665.1	1617	Putative glycogen debranching enzyme, archaeal type, TIGR01561	AKB54665.1	45.0726	19.6561	40.2596	3.78968	52.1383	11.8835	47.7062	2.91776	26.5025	8.77111	39.2226	9.78456	28.68	15.3444	30.3804	6.48872
hypothetical protein] [protein_id=AKB54666.1	1618	hypothetical protein	AKB54666.1	10.812	2.24877	2.17998	1.99185	9.05336	2.55198	15.0484	6.13487	3.94851	1.79786	5.04558	2.52569	10.6957	4.92708	5.57322	2.14893
putative metalloprotease] [protein_id=AKB54667.1	1619	putative metalloprotease	AKB54667.1	11.4601	8.82	7.61371	5.7507	11.9338	3.65248	11.0018	6.55805	9.15535	3.29005	7.23405	3.65878	8.4033	1.6648	12.3102	4.11865
Phospholipid-lipopolysaccharide ABC transporter] [protein_id=AKB54668.1	1620	Phospholipid-lipopolysaccharide ABC transporter	AKB54668.1	27.4895	8.03946	23.2073	2.31725	23.976	6.67806	19.7049	6.973	18.729	4.05943	21.6753	4.79597	20.9826	5.1772	18.9876	3.32544
hypothetical protein] [protein_id=AKB54669.1	1621	hypothetical protein	AKB54669.1	15.0966	6.58563	13.8991	3.25759	20.3783	2.34181	11.6552	7.58248	10.1616	3.41857	8.94599	3.61646	14.634	8.53709	20.7139	2.59405
O-antigen flippase Wzx] [protein_id=AKB54670.1	1622	O-antigen flippase Wzx	AKB54670.1	16.8759	2.16717	16.9922	5.66236	17.0275	6.31511	15.311	4.51853	16.1228	0.831735	15.1951	3.46676	14.4441	4.21746	13.7119	1.93746
acidic integral membrane protein] [protein_id=AKB54671.1	1623	acidic integral membrane protein	AKB54671.1	49.2297	15.5267	34.992	8.22757	39.4926	3.69644	29.247	3.72762	35.1575	4.67936	28.5204	0.62094	26.1133	12.9404	20.7809	9.02061
Succinate-semialdehyde dehydrogenase [NAD]] [protein_id=AKB54672.1	1624	Succinate-semialdehyde dehydrogenase [NAD]	AKB54672.1	59.5204	7.57121	48.7929	10.2612	75.3816	18.6201	55.331	11.8929	48.2214	8.25549	37.3538	9.82908	37.8525	5.60999	32.938	2.81872
Mobile element protein] [protein_id=AKB54673.1	1625	Mobile element protein	AKB54673.1	96.801	2.58907	94.9305	24.3851	141.809	16.3977	133.334	18.7933	118.438	19.9642	91.2258	19.8802	110.712	31.0437	161.536	33.6116
Mobile element protein] [protein_id=AKB54674.1	1626	Mobile element protein	AKB54674.1	48.068	15.2186	39.3153	5.58838	41.2067	11.868	23.0173	2.43651	43.197	9.07189	34.1582	10.2817	34.7553	7.93807	43.0126	8.5944
putative protease] [protein_id=AKB54675.1	1627	putative protease	AKB54675.1	55.2841	13.4593	66.6164	19.629	75.6433	4.26155	73.4172	17.5355	66.4037	8.05619	66.6867	11.5979	66.8084	9.91175	76.0724	17.1402
N(5),N(10)-methenyltetrahydromethanopterin cyclohydrolase] [protein_id=AKB54676.1	1628	N(5),N(10)-methenyltetrahydromethanopterin cyclohydrolase	AKB54676.1	419.602	105.332	507.831	48.144	409.081	23.1449	444.834	36.8848	509.329	110.765	554.1	62.0601	580.649	71.0626	502.205	19.4188
hypothetical protein] [protein_id=AKB54677.1	1629	hypothetical protein	AKB54677.1	27.7708	6.28997	33.846	7.87216	31.2368	10.0354	29.0219	4.36541	21.2947	7.91945	31.6332	8.34954	19.1629	5.46913	19.6326	5.56591
4-carboxymuconolactone decarboxylase] [protein_id=AKB54678.1	1630	4-carboxymuconolactone decarboxylase	AKB54678.1	73.7698	28.5895	54.3535	14.7802	39.7152	10.4981	40.9925	9.72563	56.7116	19.6832	48.9562	6.02213	50.5496	6.81611	49.7821	10.0814
hypothetical protein] [protein_id=AKB54679.1	1631	hypothetical protein	AKB54679.1	24.2324	22.7682	12.597	3.55644	9.57408	1.79393	11.8958	3.92757	10.4684	4.47202	10.8586	3.98039	4.25117	3.79382	5.78605	3.30252
hypothetical protein] [protein_id=AKB54680.1	1632	hypothetical protein	AKB54680.1	4.36507	2.13302	2.96128	1.74575	1.24754	1.45444	2.78284	0.909039	4.59289	1.45441	2.94687	2.6121	0.352283	0.610171	0.830682	0.813193
hypothetical protein] [protein_id=AKB54681.1	1633	hypothetical protein	AKB54681.1	14.9095	6.0409	9.04736	1.95086	9.98527	3.27064	7.98816	5.06141	12.4432	6.49297	7.68507	2.52295	8.06606	2.70834	11.893	9.09582
tRNA methylase Trm12p Wyeosine biosynthesis] [protein_id=AKB54682.1	1634	tRNA methylase Trm12p Wyeosine biosynthesis	AKB54682.1	34.8683	4.48537	23.8206	19.186	26.5329	12.0337	29.4926	9.22466	27.3963	6.29295	34.2782	9.36096	28.2281	4.20372	30.7019	6.69635
hypothetical protein] [protein_id=AKB54683.1	1635	hypothetical protein	AKB54683.1	0.549829	0.952331	0	0	0.868199	0.853889	0	0	0.754352	1.04131	0.319684	0.553709	0.319684	0.553709	0	0
Mobile element protein] [protein_id=AKB54684.1	1636	Mobile element protein	AKB54684.1	17.3474	6.32222	15.8179	9.85452	14.2183	3.82915	17.7756	9.89296	12.2127	7.59378	21.4655	5.22673	16.5734	7.36576	16.702	7.4854
Mobile element protein] [protein_id=AKB54685.1	1637	Mobile element protein	AKB54685.1	5.00968	4.33948	3.45016	0.492906	1.92407	1.78313	1.04616	1.812	0.786389	0.735296	1.49077	1.81597	2.20457	1.09443	1.66031	1.18356
Mobile element protein] [protein_id=AKB54686.1	1638	Mobile element protein	AKB54686.1	2.6932	2.50313	0.878311	1.52128	1.19478	1.37173	1.22869	2.12815	0.902358	1.56293	2.16387	1.05164	1.65859	2.09774	2.42235	2.13253
putative ATP-dependent helicase] [protein_id=AKB54687.1	1639	putative ATP-dependent helicase	AKB54687.1	30.6402	8.50661	32.0607	6.38066	22.5379	6.46896	33.4353	10.8231	37.6935	12.5452	37.4979	11.4771	43.6375	2.91036	35.222	9.16293
hypothetical protein] [protein_id=AKB54688.1	1640	hypothetical protein	AKB54688.1	45.0363	1.34018	21.5451	5.26769	44.79	7.07962	30.3379	12.4743	32.1096	6.78043	27.1167	9.5355	28.4074	7.47388	30.6476	5.83213
hypothetical protein] [protein_id=AKB54689.1	1641	hypothetical protein	AKB54689.1	0	0	0	0	0.379338	0.657032	0	0	0	0	0	0	0.704565	1.22034	0	0
Type I restriction-modification system, restriction subunit R] [protein_id=AKB54690.1	1642	Type I restriction-modification system, restriction subunit R	AKB54690.1	0.921982	1.59692	0.487951	0.845156	1.19677	2.07287	1.22992	1.40724	1.28566	1.46836	1.12732	1.00236	1.15024	0.70626	1.41818	1.66426
Putative protein-S-isoprenylcysteine methyltransferase] [protein_id=AKB54691.1	1643	Putative protein-S-isoprenylcysteine methyltransferase	AKB54691.1	14.8707	4.86555	11.7823	1.75152	22.9526	10.1489	18.2569	8.80729	14.625	4.07974	10.3953	3.25334	17.0529	11.3035	22.2279	8.3093
hypothetical protein] [protein_id=AKB54692.1	1644	hypothetical protein	AKB54692.1	397.391	50.4352	252.631	28.5094	350.246	20.0299	347.413	26.0176	230.982	42.6197	264.828	39.9838	269.482	45.6694	329.847	38.1869
ATP-dependent DNA helicase] [protein_id=AKB54693.1	1645	ATP-dependent DNA helicase	AKB54693.1	1.64949	2.85699	0.423297	0.501467	1.2117	0.506086	0.209231	0.3624	1.95131	1.82249	0.0975902	0.169031	0	0	0.67423	1.1678
Type I restriction-modification system, specificity subunit S] [protein_id=AKB54694.1	1646	Type I restriction-modification system, specificity subunit S	AKB54694.1	2.02164	1.77096	4.06747	2.94173	5.08077	1.86802	4.33699	2.82299	1.64762	1.52254	2.74714	1.42412	3.1937	1.62327	3.16045	1.6245
hypothetical protein] [protein_id=AKB54695.1	1647	hypothetical protein	AKB54695.1	1.50471	1.56912	0.0975902	0.169031	0.720841	0.939365	1.74756	1.07213	1.57278	1.47059	1.38315	1.35323	0.319684	0.553709	0.385274	0.667315
hypothetical protein] [protein_id=AKB54696.1	1648	hypothetical protein	AKB54696.1	5.0062	3.0981	1.30161	1.49058	3.80585	1.47454	6.0942	0.499465	1.44753	1.44291	0.975902	1.69031	1.39157	1.62038	1.39423	1.62476
Iron-sulfur cluster-binding protein] [protein_id=AKB54697.1	1649	Iron-sulfur cluster-binding protein	AKB54697.1	26.5683	6.20629	16.2702	10.7951	23.3996	8.31153	25.1833	2.9525	17.7716	4.34363	17.405	0.152549	15.7247	1.60607	13.3724	1.02932
Cell surface protein] [protein_id=AKB54698.1	1650	Cell surface protein	AKB54698.1	44.7421	9.27114	35.0809	12.6163	51.2511	10.5112	45.4798	7.00214	32.7385	3.71737	41.8138	10.4714	34.7378	14.889	24.3251	6.996
Galactoside O-acetyltransferase] [protein_id=AKB54699.1	1651	Galactoside O-acetyltransferase	AKB54699.1	16.3953	4.47025	5.79389	1.07916	15.5186	5.41027	18.083	1.78672	10.809	3.03997	6.69914	2.61837	7.11456	3.01358	6.11014	2.75815
WD-domain containing protein] [protein_id=AKB54700.1	1652	WD-domain containing protein	AKB54700.1	17.2291	2.05739	11.782	4.5582	17.8329	3.79503	18.5581	5.48577	19.0436	3.82925	16.8286	4.00961	18.709	4.63435	14.3825	9.92913
hypothetical protein] [protein_id=AKB54701.1	1653	hypothetical protein	AKB54701.1	20.2102	6.72563	20.8315	2.99504	17.4536	3.14231	28.623	2.79161	19.4453	3.10316	20.6087	3.21739	31.1216	6.65915	26.4585	9.26302
Phenylacetate-coenzyme A ligase] [protein_id=AKB54702.1	1654	Phenylacetate-coenzyme A ligase	AKB54702.1	137.809	4.92399	122.666	24.9519	63.5458	12.1441	99.6286	20.0035	120.779	10.6824	238.712	76.7168	192.771	75.9531	118.853	33.9313
Glycogen debranching enzyme] [protein_id=AKB54703.1	1655	Glycogen debranching enzyme	AKB54703.1	14.5027	6.73964	13.6363	2.53887	18.9954	6.21149	15.1889	2.03958	12.1893	1.21638	14.1348	8.69715	15.773	5.47401	21.2386	8.01788
Cell division protein FtsH] [protein_id=AKB54704.1	1656	Cell division protein FtsH	AKB54704.1	39.7737	12.3573	49.3701	10.6009	59.5553	6.18126	67.0659	20.6844	50.8042	11.1236	46.3413	9.89693	50.9689	3.14335	48.7327	4.76845
hypothetical protein] [protein_id=AKB54705.1	1657	hypothetical protein	AKB54705.1	2.3459	2.09146	1.65903	2.87353	3.31945	2.9216	6.32395	4.41155	4.19882	5.7551	4.53847	3.37472	5.44653	2.56457	3.26049	3.04299
hypothetical protein] [protein_id=AKB54706.1	1658	hypothetical protein	AKB54706.1	0.274914	0.476166	1.95215	1.69061	1.19278	1.033	0.516403	0.47073	2.05838	2.19623	2.90311	0.972939	1.30882	1.13437	0.940314	1.01025
putative methanogenesis marker protein 8] [protein_id=AKB54707.1	1659	putative methanogenesis marker protein 8	AKB54707.1	132.57	13.2675	130.315	15.5862	110.992	16.0007	134.95	13.7595	143.005	5.25403	145.765	16.2271	125.688	15.0994	104.036	16.3196
Transcriptional regulator, ArsR family] [protein_id=AKB54708.1	1660	Transcriptional regulator, ArsR family	AKB54708.1	22.8972	9.50171	18.4219	0.234109	25.3132	7.25248	20.7726	5.9763	12.5879	0.0718714	17.5934	2.86704	23.0781	4.29431	20.0796	0.87612
hypothetical protein] [protein_id=AKB54709.1	1661	hypothetical protein	AKB54709.1	8.92463	4.60401	48.1729	14.8264	18.5727	4.3653	24.2692	4.21972	20.7895	9.73248	47.6146	14.6567	40.101	18.9358	29.1538	5.59772
Methyltransferase] [protein_id=AKB54710.1	1662	Methyltransferase	AKB54710.1	16.3985	2.27196	10.6123	7.9527	8.93339	0.864817	6.83318	2.42368	3.71348	1.82913	7.62441	4.28961	5.65527	1.28358	10.7489	5.29371
putative methanogenesis marker protein 8] [protein_id=AKB54711.1	1663	putative methanogenesis marker protein 8	AKB54711.1	19.1924	3.27757	23.6643	11.1388	21.3859	2.23583	13.0641	7.1879	25.6904	0.459742	24.9734	12.0628	29.8823	10.4028	21.5585	13.7344
beta/gama crystallin family protein] [protein_id=AKB54712.1	1664	beta/gama crystallin family protein	AKB54712.1	7.82251	6.17813	6.93325	1.61807	4.61529	2.61018	6.85371	5.78054	4.61894	0.20565	6.53635	1.93053	5.43149	3.01572	3.87672	1.8573
High-affnity carbon uptake protein Hat/HatR] [protein_id=AKB54713.1	1665	High-affnity carbon uptake protein Hat/HatR	AKB54713.1	124.994	20.0976	101.026	13.4236	97.7988	5.41179	119.861	39.02	74.6225	11.174	108.804	16.7789	79.6916	12.0063	85.6564	3.5394
hypothetical protein] [protein_id=AKB54714.1	1666	hypothetical protein	AKB54714.1	21.1046	5.42074	12.4311	4.8771	25.6074	2.77985	14.2624	4.3427	12.5912	4.7469	15.2119	1.48399	15.5636	0.654314	13.7071	1.4438
hypothetical protein] [protein_id=AKB54715.1	1667	hypothetical protein	AKB54715.1	1.27175	0.443926	0.423006	0.500985	1.40336	1.34998	1.43915	1.15742	1.83843	0.573469	0.0975902	0.169031	2.34308	4.05833	3.27008	3.26397
Potassium channel protein] [protein_id=AKB54716.1	1668	Potassium channel protein	AKB54716.1	3.13216	2.78336	0.846013	1.00197	2.63645	3.82042	0.308407	0.534177	1.29784	0.710599	1.15423	1.52055	0.959052	1.66113	0.270863	0.469148
ABC transporter, ATP-binding protein] [protein_id=AKB54717.1	1669	ABC transporter, ATP-binding protein	AKB54717.1	2.46024	3.60467	2.89692	1.66414	3.42252	2.01618	3.18795	1.73396	5.90143	5.23443	1.58836	1.97951	3.0326	2.65507	2.10467	3.39823
hypothetical protein] [protein_id=AKB54718.1	1670	hypothetical protein	AKB54718.1	116.437	23.7798	109.163	4.09189	105.188	14.9288	128.888	11.1106	103.115	23.0898	143.43	26.7224	103.78	41.8535	87.8616	13.8347
hypothetical protein] [protein_id=AKB54719.1	1671	hypothetical protein	AKB54719.1	27.6392	8.05505	25.6473	6.41615	30.5433	5.56812	29.0618	7.71838	24.295	6.19927	24.1342	6.41434	27.5605	4.14295	32.2275	2.12303
hypothetical protein] [protein_id=AKB54720.1	1672	hypothetical protein	AKB54720.1	177.347	33.8691	132.436	17.1025	133.112	25.3943	134.06	3.68916	135.181	8.9486	123.08	8.84289	107.776	8.99536	101.725	2.37902
hypothetical protein] [protein_id=AKB54721.1	1673	hypothetical protein	AKB54721.1	71.577	10.1802	53.346	5.43746	57.7024	4.5297	66.3875	10.5078	54.6341	14.2584	57.6118	8.59711	40.7403	20.0151	27.0167	1.69161
hypothetical protein] [protein_id=AKB54722.1	1674	hypothetical protein	AKB54722.1	19.6145	4.53823	26.2039	7.61786	29.6208	6.36231	37.0509	11.4806	21.3786	5.04646	12.753	6.13944	22.2294	8.97372	29.2826	6.17808
hypothetical protein] [protein_id=AKB54723.1	1675	hypothetical protein	AKB54723.1	6.50845	3.00897	11.0985	3.02424	9.95493	4.00028	15.4295	8.43389	9.59345	3.27152	10.0327	4.64473	8.78629	2.85629	8.43617	0.973257
glycosyltransferase (group I)] [protein_id=AKB54724.1	1676	glycosyltransferase (group I)	AKB54724.1	90.1454	4.88953	82.404	20.9513	141.388	21.7779	170.291	15.5862	66.2536	12.8209	107.684	9.76977	98.2985	17.4753	76.7904	14.9548
hypothetical protein] [protein_id=AKB54725.1	1677	hypothetical protein	AKB54725.1	22.6593	3.42609	13.8637	9.61569	31.423	4.17568	36.9725	5.7214	17.7841	2.18762	18.5907	4.72155	27.2051	10.7047	26.4788	9.84426
Mannose-6-phosphate isomerase, bifunctional enzyme] [protein_id=AKB54726.1	1678	Mannose-6-phosphate isomerase, bifunctional enzyme	AKB54726.1	18.7894	9.13099	16.3379	8.3947	26.4671	2.56347	30.9975	17.9743	21.7555	2.125	20.0759	5.20365	12.7754	5.28796	15.8033	2.43011
hypothetical protein] [protein_id=AKB54727.1	1679	hypothetical protein	AKB54727.1	17.6811	3.27973	10.4477	4.10338	8.46792	3.4811	12.9165	2.45819	9.70503	4.51248	11.9577	3.67717	8.86464	5.60962	7.87635	1.28196
Metal dependent hydrolase] [protein_id=AKB54728.1	1680	Metal dependent hydrolase	AKB54728.1	20.7958	6.78216	27.7337	8.32893	25.122	4.23511	41.2153	1.89417	34.5145	7.99541	21.9717	3.74769	23.6272	3.89856	24.4571	5.92069
cell surface protein] [protein_id=AKB54729.1	1681	cell surface protein	AKB54729.1	45.6224	19.8486	43.064	17.4477	38.2381	7.73309	33.4982	5.57324	32.7483	9.16682	30.054	7.70879	29.317	8.08301	36.7337	15.6153
Transcriptional regulator, MarR family] [protein_id=AKB54730.1	1682	Transcriptional regulator, MarR family	AKB54730.1	7.94881	5.70901	9.11061	9.2787	5.69655	2.77193	11.4736	1.55599	6.24071	3.87875	9.34642	1.10959	6.62937	2.2291	6.41241	2.90321
Universal stress protein] [protein_id=AKB54731.1	1683	Universal stress protein	AKB54731.1	28.7298	5.85079	32.321	11.5724	23.98	4.21145	37.412	10.5049	30.5887	5.16057	27.1282	7.55352	38.9382	9.99338	32.8656	1.94255
hypothetical protein] [protein_id=AKB54732.1	1684	hypothetical protein	AKB54732.1	225.476	47.9919	296.668	47.2342	190.623	6.53299	273.785	8.43402	209.778	5.18261	278.238	14.4478	264.652	39.0426	324.359	69.257
hypothetical protein] [protein_id=AKB54733.1	1685	hypothetical protein	AKB54733.1	57.2838	22.8437	45.7325	10.7684	37.7159	2.56763	39.2137	5.54665	45.0199	5.53257	40.7854	4.83695	45.419	6.44584	50.8139	7.63046
transporter, RND superfamily] [protein_id=AKB54734.1	1686	transporter, RND superfamily	AKB54734.1	16.6639	9.74606	21.285	3.91047	27.5897	8.32563	29.5626	6.65161	21.0514	4.42577	19.1694	6.17549	19.1266	10.5704	28.9148	17.6531
Transcriptional regulator, MarR family] [protein_id=AKB54735.1	1687	Transcriptional regulator, MarR family	AKB54735.1	0.274914	0.476166	0.683131	1.18322	0.316115	0.547527	0	0	1.83225	1.36062	0.683131	1.18322	0.176141	0.305086	0.866867	1.50146
hypothetical protein] [protein_id=AKB54736.1	1688	hypothetical protein	AKB54736.1	7.42484	3.21915	2.34431	2.20298	5.6184	1.28618	7.21283	2.10317	5.90311	2.33563	4.56218	2.97962	7.76645	1.89283	5.59131	2.39313
hypothetical protein] [protein_id=AKB54737.1	1689	hypothetical protein	AKB54737.1	57.0508	2.37839	87.6785	14.8723	77.8955	3.50022	125.48	11.3679	104.355	4.98804	104.602	20.1017	84.0806	20.5136	109.724	7.12429
Ferredoxin] [protein_id=AKB54738.1	1690	Ferredoxin	AKB54738.1	9.44199	8.03172	2.31045	2.5076	3.63956	2.47226	8.47069	0.979319	0.699365	0.73014	3.8991	2.56979	1.9181	3.32226	2.81719	2.62752
GTPase YlqF] [protein_id=AKB54739.1	1691	GTPase YlqF	AKB54739.1	46.3214	6.15714	32.416	3.90582	42.0146	5.50881	36.7678	16.3245	41.6689	13.8265	32.4377	5.41652	30.9705	4.59831	36.1548	7.25775
hypothetical protein] [protein_id=AKB54740.1	1692	hypothetical protein	AKB54740.1	320.791	26.5552	360.829	43.0513	280.749	23.9617	329.254	44.8947	254.715	17.8417	352.538	24.0329	402.777	48.5257	341.517	98.971
tRNA-specific adenosine-34 deaminase] [protein_id=AKB54741.1	1693	tRNA-specific adenosine-34 deaminase	AKB54741.1	9.7648	3.25205	7.09457	3.02369	6.1197	4.74642	2.78407	1.59537	6.12306	3.77262	9.6009	3.43385	5.91731	6.2579	7.14514	6.36034
Phosphoenolpyruvate synthase] [protein_id=AKB54742.1	1694	Phosphoenolpyruvate synthase	AKB54742.1	374.507	92.92	485.522	197.95	312.024	43.6659	358.405	61.8985	501.897	106.043	329.824	70.7658	344.991	51.7275	309.237	38.6971
hypothetical protein] [protein_id=AKB54743.1	1695	hypothetical protein	AKB54743.1	6.10832	4.33358	8.85206	6.92874	9.60546	2.77643	11.6876	6.13376	4.18233	1.89009	8.15158	7.04982	7.82164	5.44845	4.55573	1.41075
Mobile element protein] [protein_id=AKB54744.1	1696	Mobile element protein	AKB54744.1	6.46403	2.28121	3.77523	2.73479	9.83049	5.64392	6.7726	5.94069	6.87096	8.40498	7.61347	5.41857	9.27395	7.87915	11.9362	5.87911
MoxR-related protein] [protein_id=AKB54745.1	1697	MoxR-related protein	AKB54745.1	0	0	0.748422	1.05298	2.29894	1.92133	1.24327	0.554095	3.0693	3.7747	0.739234	0.386664	0.848108	0.798438	1.44478	2.50243
hypothetical protein] [protein_id=AKB54746.1	1698	hypothetical protein	AKB54746.1	0.782786	1.35583	1.59438	1.97666	0	0	0.615579	0.53311	1.52688	1.86777	2.55651	2.21419	0	0	0	0
hypothetical protein] [protein_id=AKB54747.1	1699	hypothetical protein	AKB54747.1	2.57147	2.47996	3.45074	2.44384	2.92918	0.996365	2.06808	0.383402	2.20188	1.90932	2.13469	1.28913	2.02843	1.02939	2.76186	0.65109
Acetolactate synthase large subunit] [protein_id=AKB54748.1	1700	Acetolactate synthase large subunit	AKB54748.1	40.9042	4.71534	56.377	11.4102	69.8751	4.0955	86.4218	12.7295	60.652	5.3058	51.6126	3.35912	49.5423	6.54046	65.6038	20.29
hypothetical protein] [protein_id=AKB54749.1	1701	hypothetical protein	AKB54749.1	19.7692	3.39475	18.4863	1.62715	18.9431	3.03863	20.6675	2.38469	23.345	4.3906	20.2556	8.29378	18.3543	5.81755	20.789	4.67655
Sodium/calcium exchanger protein] [protein_id=AKB54750.1	1702	Sodium/calcium exchanger protein	AKB54750.1	23.1823	17.2734	10.0221	6.14157	18.5662	4.26893	18.4265	6.39252	11.933	3.70598	16.6736	3.95931	12.2646	9.05054	9.14869	5.56526
Ribosomal-protein-S18p-alanine acetyltransferase] [protein_id=AKB54751.1	1703	Ribosomal-protein-S18p-alanine acetyltransferase	AKB54751.1	25.7613	10.6834	29.9429	2.0157	31.3457	10.2179	42.3084	3.89931	16.7936	10.2686	36.7158	4.51726	22.255	16.9959	24.1526	10.8942
hypothetical protein] [protein_id=AKB54752.1	1704	hypothetical protein	AKB54752.1	4947.69	695.583	4464.8	646.215	4615.05	116.001	4570.89	612.678	3421.53	247.198	4552.04	380.041	3928.08	387.695	4611.54	651.219
Ribosomal-protein-S18p-alanine acetyltransferase] [protein_id=AKB54753.1	1705	Ribosomal-protein-S18p-alanine acetyltransferase	AKB54753.1	23.0531	11.6068	18.1272	7.02286	26.4228	4.87873	34.5886	11.582	10.7848	3.91086	13.1725	11.3187	11.3676	5.26558	14.2653	6.14269
Nickel responsive regulator NikR] [protein_id=AKB54754.1	1706	Nickel responsive regulator NikR	AKB54754.1	18.8398	7.27614	13.1481	5.64419	20.6879	3.85744	13.8598	3.34116	10.6825	3.69275	14.6186	3.19282	13.3766	2.17224	10.9596	0.360641
Putative FKBP-type peptidyl-prolyl cis-trans isomerase] [protein_id=AKB54755.1	1707	Putative FKBP-type peptidyl-prolyl cis-trans isomerase	AKB54755.1	652.576	218.97	681.918	38.9807	499.626	41.2707	544.627	25.1033	755.306	62.6665	722.223	69.1556	862.559	84.8138	778.609	80.8396
heat shock protein] [protein_id=AKB54756.1	1708	heat shock protein	AKB54756.1	184.377	43.9329	182.843	20.5761	175.335	24.8306	205.596	29.7414	233.717	36.511	193.28	12.3509	219.238	40.5849	182.499	5.52377
hypothetical protein] [protein_id=AKB54757.1	1709	hypothetical protein	AKB54757.1	80.0751	28.0353	83.7513	18.9836	86.222	31.8945	103.394	12.7608	78.5363	16.0515	80.3382	2.74037	77.3824	9.63183	74.6914	20.1332
Fructokinase] [protein_id=AKB54758.1	1710	Fructokinase	AKB54758.1	5.88623	1.10667	10.935	8.28966	5.57809	3.77317	4.65628	2.47121	7.70641	1.76441	8.874	4.78425	8.72361	5.03361	5.47317	2.25302
Transposase] [protein_id=AKB54759.1	1711	Transposase	AKB54759.1	4.63999	2.57256	7.38769	1.36376	7.3802	4.34243	13.5041	3.02818	8.75395	3.68555	10.8381	5.63081	9.71778	6.59936	6.11014	2.75815
Phage shock protein A] [protein_id=AKB54760.1	1712	Phage shock protein A	AKB54760.1	148.515	2.21214	159.527	58.2506	91.8524	28.5177	108.307	33.8616	180.675	23.663	122.617	43.3526	163.203	16.405	120.349	58.3183
hypothetical protein] [protein_id=AKB54761.1	1713	hypothetical protein	AKB54761.1	130.582	50.5389	167.19	16.6741	151.112	23.4972	154.939	6.43727	144.799	44.2837	163.651	11.4695	139.723	32.3037	106.432	2.49255
Universal stress protein] [protein_id=AKB54762.1	1714	Universal stress protein	AKB54762.1	48.2866	13.4681	29.6486	4.94186	61.0343	3.60797	79.0519	16.1573	35.5253	2.85781	32.8961	7.20085	40.0589	0.690121	43.2701	3.7164
Mobile element protein] [protein_id=AKB54763.1	1715	Mobile element protein	AKB54763.1	4.51232	4.67014	3.77401	4.84511	3.35083	0.581118	4.96345	1.94871	1.77126	1.55094	5.36295	4.21504	2.79881	2.88036	6.7721	6.51838
universal archaeal KH-domain/beta-lactamase-domain protein] [protein_id=AKB54764.1	1716	universal archaeal KH-domain/beta-lactamase-domain protein	AKB54764.1	49.324	22.266	61.1501	15.7508	50.9763	5.27929	66.0251	16.0114	49.4526	9.35386	53.8853	16.0811	35.4611	4.11616	36.4895	6.85247
Ferredoxin domain containing protein] [protein_id=AKB54765.1	1717	Ferredoxin domain containing protein	AKB54765.1	25.4609	9.19521	28.0215	12.1801	21.4829	3.91734	16.1203	4.70325	18.8313	2.86438	22.9139	0.33121	22.487	3.17587	17.0203	3.2347
hypothetical protein] [protein_id=AKB54766.1	1718	hypothetical protein	AKB54766.1	9.63502	4.46306	12.5605	12.5114	10.6872	4.43738	6.18002	2.09051	6.46336	1.63318	7.29243	1.85573	8.96684	2.83776	13.8444	9.2921
membrane protein, putative] [protein_id=AKB54767.1	1719	membrane protein, putative	AKB54767.1	5.5256	3.82894	4.23088	1.48973	2.85549	2.65775	4.55216	2.36945	6.02056	1.52387	6.1168	2.3947	4.55079	4.3349	6.11014	2.75815
Inositol-1-phosphate synthase] [protein_id=AKB54768.1	1720	Inositol-1-phosphate synthase	AKB54768.1	4.70121	6.22081	2.05061	1.78176	6.8281	1.31701	8.02576	9.88588	1.56659	0.519047	3.64234	1.04225	2.89661	2.90638	2.4681	2.98034
Ferritin-like di-iron-carboxylate protein] [protein_id=AKB54769.1	1721	Ferritin-like di-iron-carboxylate protein	AKB54769.1	33.6613	14.3164	45.1147	9.23904	32.7392	11.0768	36.2362	13.4696	35.5373	4.2079	41.4521	7.76077	28.8274	5.77908	26.0897	1.03146
L-sorbosone dehydrogenase] [protein_id=AKB54770.1	1722	L-sorbosone dehydrogenase	AKB54770.1	18.2155	6.96495	18.2247	6.85228	36.7581	10.6207	39.2176	12.3848	20.2041	7.87655	13.5438	5.90772	21.5875	12.0756	20.1472	12.331
hypothetical protein] [protein_id=AKB54771.1	1723	hypothetical protein	AKB54771.1	8.40523	4.13688	5.2385	4.869	6.08435	2.26834	8.79962	3.52859	4.71054	2.19339	8.09779	3.03693	4.95574	3.3711	7.333	5.10641
hypothetical protein] [protein_id=AKB54772.1	1724	hypothetical protein	AKB54772.1	19.1476	6.49879	18.4205	7.82239	17.7692	3.23554	20.7231	5.89625	21.9506	6.20243	11.4775	6.59416	18.3261	10.1102	17.1921	6.50282
hypothetical protein] [protein_id=AKB54773.1	1725	hypothetical protein	AKB54773.1	8.5077	7.13458	4.91366	5.48576	7.84565	3.27761	8.56739	0.567158	5.01751	1.35523	9.69849	3.47775	7.43235	4.45222	6.34694	5.84856
hypothetical protein] [protein_id=AKB54774.1	1726	hypothetical protein	AKB54774.1	9.22404	2.02491	8.98416	3.92481	9.13352	2.03881	10.4057	4.26966	11.2595	4.08672	8.25376	1.34416	13.1472	4.25078	13.9493	3.77683
Superoxide dismutase (Mn/Fe)] [protein_id=AKB54775.1	1727	Superoxide dismutase (Mn/Fe)	AKB54775.1	711.785	120.865	1004.28	22.3458	718.68	13.8456	908.681	125.561	777.746	113.347	1080.9	48.6127	809.178	273.065	582.516	74.2679
hypothetical protein] [protein_id=AKB54776.1	1728	hypothetical protein	AKB54776.1	0	0	0.618187	0.5376	1.87331	1.49207	0.923986	0.925224	0.323736	0.560727	0.29277	0.507093	0	0	0.67423	1.1678
putative IS1648 transposase] [protein_id=AKB54777.1	1729	putative IS1648 transposase	AKB54777.1	5.03664	3.45359	2.63615	2.50165	3.79937	2.52168	3.49265	3.37287	1.37887	1.36058	4.55667	4.36168	2.57189	2.23298	3.01836	0.86842
Ribosomal-protein-L7p-serine acetyltransferase] [protein_id=AKB54778.1	1730	Ribosomal-protein-L7p-serine acetyltransferase	AKB54778.1	4.61514	6.71705	6.54284	4.08341	6.21328	5.57881	3.59183	3.44549	3.34694	1.29342	6.4848	1.22993	3.99669	1.88361	4.6845	2.34162
hypothetical protein] [protein_id=AKB54779.1	1731	hypothetical protein	AKB54779.1	19.6894	4.62824	6.53947	8.80241	12.8717	5.46699	13.7727	5.63517	6.72631	4.71425	11.9836	4.52058	5.79882	1.99636	12.5906	6.02862
[truncated: 1,736 more rows]
