# Supplementary material for: Regulatory responses of Methanosarcina barkeri to freezing temperatures and perchlorates: Transcriptomic insights into the potential for biological Martian methanogenesis
Source: Research Square preprint supplement (doi:10.21203/rs.3.rs-247246/v1), 2021-02-22
Supplement: Supplementary file 3 [file 6013b95945e070c7253eff51.xlsx]

## Sheet: Sheet1
Table 1. Differential expression (Log2-fold change ± standard error) of M. barkeri MS genes implicated in the Wood-Ljungdahl pathway and hydrogenotrophic methanogenesis. LFC is relative to 30˚C perchlorate-free control. Multiple entries indicate statistical significance in multi-copy genes (Wald test, p < 0.05). Abbreviations: n.s.d., no significant difference from control; W, tungsten active sit…
Gene	0˚C ClO4--free	30˚C Ca(ClO4)2	30˚C Mg(ClO4)2	30˚CNa(ClO4)
fmdA	n.s.d.	n.s.d.	0.40 ± 0.10 (W)	n.s.d.
			0.40 ± 0.10 (W)
fmdB	0.34 ± 0.12 (W)	0.44 ± 0.14 (Mo)	0.44 ± 0.14 (Mo)	0.44 ± 0.14 (Mo)
			0.36 ± 0.13 (Mo)	0.38 ± 0.13 (Mo)
fmdC	n.s.d.	0.32 ± 0.14 (Mo)	0.39 ± 0.13 (Mo)	0.46 ± 0.13 (Mo)
		0.32 ± 0.14 (Mo)	0.39 ± 0.13 (Mo)	0.45 ± 0.13 (Mo)
fmdD	n.s.d.	0.75 ± 0.15 (Mo)	0.52 ± 0.15 (Mo)	0.59 ± 0.15 (Mo)
		0.75 ± 0.15 (Mo)	0.52 ± 0.15 (Mo)	0.59 ± 0.15 (Mo)
fmdE	n.s.d.	n.s.d.	0.51 ± 0.12 (Mo)	0.43 ± 0.13 (Mo)
			-0.45 ± 0.19 (Mo)	-0.50 ± 0.19 (Mo)
echA	n.s.d.	0.62 ± 0.14	n.s.d.	n.s.d.
echB	n.s.d.	0.60 ± 0.19	n.s.d.	n.s.d.
echE	n.s.d.	0.35 ± 0.12	n.s.d.	n.s.d.
echF	-0.33 ± 0.15	n.s.d.	-0.77 ± 0.20	-0.70 ± 0.20
mch	0.21 ± 0.08	n.s.d.	n.s.d.	n.s.d.
hdrD	0.23 ± 0.07	n.s.d.	n.s.d.	n.s.d.
hdrE	0.22 ± 0.09	n.s.d.	n.s.d.	n.s.d.
mtrA	-0.51 ± 0.22	n.s.d.	n.s.d.	n.s.d.
mtrB	n.s.d.	0.59 ± 0.15	n.s.d.	n.s.d.
vhtA	n.s.d.	0.31 ± 0.12	-0.32 ± 0.12	n.s.d.
vhtC	n.s.d.	0.46 ± 0.17	n.s.d.	n.s.d.
frha	0.38 ± 0.12	n.s.d.	n.s.d.	n.s.d.
	0.35 ± 0.12
frhb	0.31 ± 0.13	n.s.d.	n.s.d.	n.s.d.
	0.17 ± 0.07
frhg	0.30 ± 0.13	n.s.d.	n.s.d.	n.s.d.
	0.29 ± 0.13
mcrA	n.s.d.	n.s.d.	-0.40 ± 0.16	-0.36 ± 0.16
cooS	n.s.d.	n.s.d.	0.40 ± 0.13	0.49 ± 0.13
cdhε	n.s.d.	0.53 ± 0.14	n.s.d.	n.s.d.
cdhγ	n.s.d.	0.39 ± 0.16	n.s.d.	n.s.d.
