# Supplementary material for: Regulatory responses of Methanosarcina barkeri to freezing temperatures and perchlorates: Transcriptomic insights into the potential for biological Martian methanogenesis
Source: Research Square preprint supplement (doi:10.21203/rs.3.rs-247246/v1), 2021-02-22
Supplement: Supplementary file 4 [file bbd32ed2103596649cc08130.xlsx]

## Sheet: 0˚C perchlorate free (Table S5)
	Table S5. Significantly differentially expressed genes of M. barkeri at 0˚C relative to the 30˚C perchlorate-free control (Wald test, P < 0.05).
	Abbreviations: ProteinID, GenBank protein accession number; baseMean, normalized transcript counts of all replicates normalized for sequencing depth;
	log2FoldChange, log2-fold change in expression of group relative to 30˚C perchlorate-free control; lfcSE, standard error of log2-fold change;
	padj, p-value adjusted for multiple testing using Benjamini-Hochberg correction.
Temperature	Temperature (0˚C vs. 30˚C Control)
	Protein	Protein ID	baseMean	log2FoldChange	lfcSE	pvalue	padj	regulation	Significant?	Metabolism
	hypothetical protein	AKB53130.1	6.46418	0.99551	0.612378	0.00225211	0.0368199	Up	Yes
	hypothetical protein	AKB53131.1	21.4367	0.84862	0.343945	0.00027352	0.0121539	Up	Yes
	Ribosome biogenesis protein Nop10	AKB55890.1	52.097	0.580124	0.163169	1.89e-05	0.00223005	Up	Yes
	Ferredoxin	AKB54562.1	19.2107	0.536274	0.278681	0.00194019	0.0339631	Up	Yes
	Cell division protein FtsH	AKB53084.1	1090.89	0.494536	0.124273	3.34e-06	0.00068167	Up	Yes
	Methylcobalamin:coenzyme M methyltransferase, methylamine-specific	AKB53150.1	1200.59	0.467271	0.0795997	3.13e-10	5.42e-07	Up	Yes
	Type I restriction-modification system, DNA-methyltransferase subunit M	AKB55503.1	43.4827	0.458477	0.170682	0.00041014	0.0151229	Up	Yes
	TPR domain protein, putative component of TonB system	AKB54323.1	48.1914	0.44887	0.145251	0.00012064	0.00720908	Up	Yes
	hypothetical protein	AKB54453.1	95.9373	0.447974	0.143144	9.74e-05	0.0068083	Up	Yes
	LSU ribosomal protein L3e (L3p)	AKB55610.1	1612.06	0.433554	0.127929	3.4e-05	0.00337186	Up	Yes
	Anthranilate phosphoribosyltransferase	AKB54950.1	163.169	0.421632	0.13316	0.00010365	0.00697217	Up	Yes
	HSP20 type chaperone	AKB55507.1	1106.25	0.417389	0.129078	7.17e-05	0.00577636	Up	Yes
	SSU ribosomal protein S9e (S4p)	AKB55577.1	533.843	0.408116	0.110217	1.5e-05	0.0019711	Up	Yes
	DNA-directed RNA polymerase subunit N	AKB53477.1	383.945	0.406378	0.134551	0.00015503	0.00850576	Up	Yes
	hypothetical protein	AKB55489.1	16992.3	0.396254	0.115981	4.56e-05	0.00405338	Up	Yes
	putative cell division protein	AKB55882.1	42.3838	0.393258	0.130588	0.00019454	0.00991559	Up	Yes
	PUA-PAPS reductase like fusion	AKB56122.1	401.93	0.388012	0.0761106	3.43e-08	1.76e-05	Up	Yes
	Coenzyme F420 hydrogenase subunit alpha	AKB54451.1	967.579	0.382172	0.120132	9.23e-05	0.00666152	Up	Yes
	LSU ribosomal protein L10e (L16p)	AKB53189.1	935.762	0.371368	0.0992349	1.54e-05	0.0019711	Up	Yes
	Phenylacetate-coenzyme A ligase	AKB54702.1	131.963	0.369722	0.143362	0.00073868	0.0215319	Up	Yes
	Pyrimidine deaminase archaeal predicted	AKB56055.1	243.88	0.365808	0.112227	8.4e-05	0.00619705	Up	Yes
	Phosphoribosylanthranilate isomerase	AKB54949.1	116.216	0.358943	0.138286	0.00077252	0.0217779	Up	Yes
	Coenzyme F420 hydrogenase subunit alpha	AKB56018.1	2570.33	0.352604	0.121731	0.00027806	0.0121995	Up	Yes
	Trimethylamine:corrinoid methyltransferase	AKB53459.1	223.701	0.349655	0.0868616	5.74e-06	0.00104691	Up	Yes
	Lysine 2,3-aminomutase	AKB56252.1	99.1697	0.347904	0.169874	0.00293921	0.0437395	Up	Yes
	Thiazole biosynthetic enzyme Thi4	AKB55407.1	179.7	0.347777	0.110633	0.000148	0.00850576	Up	Yes
	Phosphoribosylformylglycinamidine cyclo-ligase	AKB53132.1	227.089	0.343564	0.0882514	9.48e-06	0.00146596	Up	Yes
	Valyl-tRNA synthetase	AKB53689.1	724.466	0.340094	0.101025	6.92e-05	0.00570975	Up	Yes
	SSU ribosomal protein S15e (S19p)	AKB55606.1	534.635	0.33949	0.0912283	1.93e-05	0.00223005	Up	Yes
	Formylmethanofuran dehydrogenase subunit B	AKB53645.1	432.044	0.336172	0.122997	0.00051913	0.0171287	Up	Yes
	archaeosine tRNA-ribosyltransferase type 2	AKB53043.1	134.146	0.32966	0.125024	0.00067982	0.0204893	Up	Yes
	7,8-didemethyl-8-hydroxy-5-deazariboflavin synthase subunit 1	AKB54564.1	69.9161	0.329023	0.13525	0.00165119	0.0308529	Up	Yes
	D-tyrosyl-tRNA(Tyr) deacylase	AKB55255.1	62.026	0.328498	0.159961	0.00294036	0.0437395	Up	Yes
	3,4-dihydroxy-2-butanone 4-phosphate synthase	AKB53440.1	200.871	0.326925	0.0982336	9.82e-05	0.0068083	Up	Yes
	Serine hydroxymethyltransferase / L-threonine aldolase / L-allo-threonine aldolase	AKB54004.1	556.381	0.321485	0.0737616	1.68e-06	0.00036376	Up	Yes
	putative oxidoreductase	AKB54563.1	153.781	0.318435	0.108215	0.00030055	0.0128607	Up	Yes
	Choline permease LicB	AKB53457.1	168.58	0.317394	0.120938	0.00078391	0.0217779	Up	Yes
	Trimethylamine methyltransferase corrinoid protein	AKB53458.1	69.3048	0.317114	0.134988	0.00163321	0.0308529	Up	Yes
	Translation elongation factor 2	AKB53891.1	2801.18	0.313978	0.0628683	6.52e-08	2.51e-05	Up	Yes
	Pyruvate carboxyl transferase subunit A	AKB55869.1	293.073	0.312915	0.108419	0.00037055	0.0142703	Up	Yes
	Coenzyme F420 hydrogenase subunit beta	AKB56015.1	1151.02	0.312452	0.134048	0.00150644	0.0300076	Up	Yes
	DNA topoisomerase I	AKB55369.1	78.4576	0.312146	0.138694	0.00205959	0.0349929	Up	Yes
	AAA family ATPase	AKB56096.1	125.874	0.308812	0.123475	0.00115448	0.0263253	Up	Yes
	hypothetical protein	AKB54115.1	49.9917	0.307977	0.142384	0.00271779	0.0418964	Up	Yes
	Aspartokinase	AKB53133.1	527.499	0.30717	0.135191	0.00203728	0.0349566	Up	Yes
	Coenzyme F420 hydrogenase subunit gamma	AKB54452.1	456.337	0.304982	0.133214	0.00168485	0.0308529	Up	Yes
	Cold-shock DEAD-box protein A	AKB55811.1	473.535	0.304112	0.0925341	0.00011064	0.00697217	Up	Yes
	Eukaryotic translation initiation factor 2 gamma subunit	AKB55664.1	382.829	0.300436	0.112168	0.00075623	0.0217779	Up	Yes
	Phosphoribosylamine--glycine ligase	AKB55322.1	296.233	0.299165	0.0931923	0.00015706	0.00850576	Up	Yes
	Pyruvate carboxyl transferase subunit B	AKB55870.1	345.017	0.297816	0.120025	0.00124766	0.0273728	Up	Yes
	Alanyl-tRNA synthetase	AKB53203.1	1057.63	0.297797	0.0578295	3.55e-08	1.76e-05	Up	Yes
	Cobalt-precorrin-6 synthase, anaerobic	AKB53415.1	250.19	0.297697	0.122104	0.00143455	0.0291118	Up	Yes
	Acetylornithine aminotransferase	AKB53122.1	358.15	0.297095	0.072689	7.3e-06	0.00126563	Up	Yes
	Phosphoserine phosphatase	AKB56346.1	668.99	0.294055	0.0904304	0.00013022	0.00764978	Up	Yes
	COG1821 family protein	AKB54197.1	308.295	0.292334	0.117647	0.0014249	0.0291118	Up	Yes
	LSU ribosomal protein L8e (L2p)	AKB55607.1	804.672	0.290889	0.112103	0.00094967	0.0238519	Up	Yes
	Uridylate kinase	AKB53260.1	102.059	0.290507	0.107056	0.00071559	0.0213814	Up	Yes
	Coenzyme F420 hydrogenase subunit gamma	AKB56016.1	1777.89	0.289508	0.133633	0.00268525	0.0418964	Up	Yes
	cell surface protein	AKB53755.1	4336.42	0.283218	0.0775629	3.57e-05	0.00343885	Up	Yes
	Geranylgeranyl diphosphate reductase	AKB54793.1	114.935	0.283156	0.11129	0.00118781	0.0266252	Up	Yes
	hypothetical protein	AKB56017.1	906.235	0.282169	0.111099	0.00109176	0.0253962	Up	Yes
	translation initiation factor IF-2 subunit beta	AKB56473.1	433.573	0.281443	0.0924401	0.00033575	0.0135013	Up	Yes
	Anthranilate synthase, aminase component	AKB54948.1	189.25	0.28032	0.0894855	0.00022917	0.010881	Up	Yes
	transporter, RND superfamily	AKB53364.1	279.196	0.279987	0.129126	0.0029953	0.0443663	Up	Yes
	3-isopropylmalate dehydrogenase	AKB53225.1	405.005	0.278825	0.0923953	0.00032578	0.0135013	Up	Yes
	putative exonuclease, DNA ligase-associated	AKB54267.1	54.1377	0.276662	0.124514	0.0029056	0.0435965	Up	Yes
	S-layer family duplication domain protein	AKB56466.1	2761.09	0.276322	0.0762677	3.73e-05	0.00349746	Up	Yes
	Arginyl-tRNA synthetase	AKB56484.1	302.041	0.275918	0.0698624	1.02e-05	0.00146596	Up	Yes
	hypothetical protein	AKB55761.1	125.004	0.2746	0.0935813	0.00046477	0.0165266	Up	Yes
	Indolepyruvate oxidoreductase subunit IorA	AKB53805.1	311.071	0.270899	0.126449	0.00320619	0.0458743	Up	Yes
	hypothetical protein	AKB55291.1	117.96	0.269296	0.104168	0.00117903	0.0266252	Up	Yes
	Pantoate kinase, archaeal	AKB54906.1	194.607	0.26898	0.0998778	0.00079866	0.0217779	Up	Yes
	Carbamoyl-phosphate synthase large chain	AKB54221.1	704.849	0.266367	0.0697363	1.89e-05	0.00223005	Up	Yes
	hypothetical protein	AKB53728.1	107.608	0.265666	0.0994401	0.00098701	0.0240559	Up	Yes
	N-acetyl-gamma-glutamyl-phosphate reductase	AKB55499.1	175.911	0.265411	0.083928	0.00022797	0.010881	Up	Yes
	Aconitate hydratase	AKB53331.1	663.272	0.263888	0.0736042	4.56e-05	0.00405338	Up	Yes
	Putative Zn-dependent hydrolase in polyisoprenoid biosynthetic cluster	AKB53484.1	518.076	0.26313	0.088257	0.00033189	0.0135013	Up	Yes
	Triosephosphate isomerase	AKB53066.1	205.713	0.260303	0.0891775	0.00049103	0.0165495	Up	Yes
	Threonyl-tRNA synthetase	AKB54789.1	418.289	0.259833	0.0772975	0.00011895	0.00720908	Up	Yes
	Biosynthetic Aromatic amino acid aminotransferase alpha / Aspartate aminotransferase	AKB54105.1	129.429	0.254867	0.099468	0.001382	0.0290221	Up	Yes
	Putative FKBP-type peptidyl-prolyl cis-trans isomerase	AKB54755.1	644.994	0.253902	0.0879123	0.00046918	0.0165266	Up	Yes
	MoxR-like ATPase	AKB53730.1	131.634	0.252445	0.100503	0.00164695	0.0308529	Up	Yes
	L-threonine 3-O-phosphate decarboxylase	AKB53838.1	207.746	0.249794	0.0965033	0.00143627	0.0291118	Up	Yes
	Formaldehyde activating enzyme	AKB53065.1	1115.5	0.248545	0.0522475	3.51e-07	0.00011052	Up	Yes
	Thiamin biosynthesis protein ThiC	AKB56158.1	1975.49	0.24843	0.0809982	0.0003872	0.0145874	Up	Yes
	Phosphoserine phosphatase	AKB56347.1	324.912	0.247173	0.106016	0.00265442	0.0418192	Up	Yes
	LSU ribosomal protein L17e (L22p)	AKB55605.1	625.597	0.244467	0.102293	0.0021074	0.0356305	Up	Yes
	DNA-directed RNA polymerase subunit D	AKB55575.1	1069.59	0.243753	0.0991714	0.00215977	0.0361284	Up	Yes
	Chaperone protein DnaK	AKB54200.1	1063.24	0.24101	0.0873212	0.00089316	0.0235351	Up	Yes
	O-phosphoseryl-tRNA(Cys) synthetase	AKB56439.1	461.538	0.237257	0.0783947	0.00043703	0.0157786	Up	Yes
	hypothetical protein	AKB56410.1	205.765	0.236819	0.100202	0.00279662	0.0423279	Up	Yes
	Glycyl-tRNA synthetase	AKB56434.1	321.986	0.234815	0.097353	0.00245993	0.0396335	Up	Yes
	LSU ribosomal protein L10Ae (L1p)	AKB56174.1	1491.2	0.231599	0.0875636	0.0012636	0.0273728	Up	Yes
	CoB--CoM heterodisulfide reductase 2 iron-sulfur subunit D	AKB55857.1	1896.27	0.229659	0.0672437	0.00019112	0.00988707	Up	Yes
	Aspartate aminotransferase	AKB55423.1	207.526	0.226075	0.0836525	0.00126234	0.0273728	Up	Yes
	LSU ribosomal protein L9e (L6p)	AKB55595.1	871.951	0.225856	0.0914906	0.00217472	0.0361284	Up	Yes
	Protein-export membrane protein SecD	AKB53142.1	1453.37	0.225582	0.0652388	0.00010961	0.00697217	Up	Yes
	translation initiation factor IF-2 subunit beta	AKB56474.1	644.369	0.225444	0.0917331	0.00321623	0.0458743	Up	Yes
	Glutamate synthase [NADPH] large chain	AKB56227.1	846.336	0.224854	0.0531816	3.91e-06	0.00075333	Up	Yes
	CoB--CoM heterodisulfide reductase 2 subunit E	AKB55858.1	1030.04	0.224019	0.088317	0.00197928	0.034301	Up	Yes
	Glutamine synthetase type I	AKB55256.1	4494.53	0.220687	0.0727564	0.00047205	0.0165266	Up	Yes
	Ketol-acid reductoisomerase	AKB55736.1	1237.56	0.219668	0.065226	0.00015249	0.00850576	Up	Yes
	Nitrogenase (molybdenum-iron) reductase and maturation protein NifH	AKB55187.1	176.16	0.219379	0.0938476	0.00327302	0.0463032	Up	Yes
	Methionyl-tRNA synthetase	AKB56109.1	379.772	0.216437	0.0657172	0.00020707	0.0104014	Up	Yes
	LSU ribosomal protein P0 (L10p)	AKB56173.1	1952.72	0.216259	0.0837806	0.00165882	0.0308529	Up	Yes
	CTP synthase	AKB55317.1	392.71	0.212614	0.0768772	0.00112101	0.0257312	Up	Yes
	Glutamyl-tRNA(Gln) amidotransferase transferase subunit	AKB54238.1	405.758	0.210453	0.0654987	0.00038216	0.0145558	Up	Yes
	Nucleoside diphosphate kinase	AKB54136.1	725.784	0.21023	0.0882127	0.00324631	0.0461136	Up	Yes
	N(5),N(10)-methenyltetrahydromethanopterin cyclohydrolase	AKB54676.1	463.067	0.208731	0.0833433	0.00277303	0.0423279	Up	Yes
	TATA-box binding protein	AKB56156.1	206.705	0.208669	0.0792665	0.0017558	0.0316959	Up	Yes
	Phosphate ABC transporter, periplasmic phosphate-binding protein PstS	AKB53662.1	853.184	0.205067	0.0631677	0.0003389	0.0135013	Up	Yes
	Isoleucyl-tRNA synthetase	AKB53987.1	1161.88	0.20473	0.0711165	0.00081055	0.0217779	Up	Yes
	Methylenetetrahydrofolate dehydrogenase (NADP+)	AKB54003.1	398.944	0.20439	0.0795886	0.00221702	0.036418	Up	Yes
	GTP cyclohydrolase I type 2	AKB56383.1	691.686	0.202177	0.0748853	0.00160959	0.0308529	Up	Yes
	Ribonucleotide reductase of class III (anaerobic), large subunit	AKB56463.1	703.272	0.200316	0.0603221	0.00022031	0.0107547	Up	Yes
	Inositol-1-phosphate synthase	AKB56460.1	367.564	0.199255	0.0828028	0.00343384	0.048185	Up	Yes
	Preprotein translocase secY subunit	AKB55588.1	668.927	0.189082	0.0717317	0.00212347	0.035728	Up	Yes
	Sterol-regulatory element-binding protein intramembrane protease	AKB55139.1	395.1	0.188865	0.068058	0.00137867	0.0290221	Up	Yes
	Geranylfarnesyl diphosphate synthase	AKB53485.1	342.639	0.173887	0.0687522	0.00305946	0.0447429	Up	Yes
	Coenzyme F420 hydrogenase subunit beta	AKB56225.1	427.148	0.171725	0.0672675	0.00319473	0.0458743	Up	Yes
	hypothetical protein	AKB53298.1	1.38595	-0.0470293	0.133758	0.00090311	0.0235351	Down	Yes
	hypothetical protein	AKB55055.1	1.65455	-0.0597957	0.141711	0.0035178	0.0489667	Down	Yes
	hypothetical protein	AKB55963.1	1.79809	-0.0649562	0.14655	0.00335693	0.0472972	Down	Yes
	Ferredoxin	AKB54738.1	9.08607	-0.0725826	0.152733	0.00304985	0.0447429	Down	Yes
	haloacid dehalogenase-like hydrolase	AKB54310.1	1117.02	-0.181	0.0685901	0.00229167	0.0372907	Down	Yes
	hypothetical protein	AKB54304.1	752.811	-0.250538	0.0818073	0.00033879	0.0135013	Down	Yes
	Phosphoribosyl transferase domain protein	AKB53521.1	81.9519	-0.259763	0.114789	0.00314633	0.0454382	Down	Yes
	Lead, cadmium, zinc and mercury transporting ATPase	AKB53177.1	239.858	-0.25995	0.0962167	0.00093208	0.0236099	Down	Yes
	hypothetical protein	AKB54720.1	128.902	-0.260544	0.0944534	0.00079561	0.0217779	Down	Yes
	hypothetical protein	AKB54880.1	103.758	-0.262839	0.105975	0.00165606	0.0308529	Down	Yes
	Cell division protein FtsH	AKB53671.1	228.08	-0.268113	0.0942008	0.000669	0.0203399	Down	Yes
	Transcriptional regulator, ArsR family	AKB56212.1	247.016	-0.273212	0.0964512	0.00059446	0.0189029	Down	Yes
	Transcriptional regulator, ArsR family	AKB55462.1	131.959	-0.274287	0.103154	0.00100358	0.0240559	Down	Yes
	Transcriptional regulator, ArsR family	AKB56216.1	270.37	-0.274477	0.104363	0.00104901	0.0247338	Down	Yes
	Transcriptional regulator, ArsR family	AKB56222.1	129.079	-0.281358	0.10267	0.00077719	0.0217779	Down	Yes
	hypothetical protein	AKB53041.1	376.159	-0.284328	0.108931	0.00100638	0.0240559	Down	Yes
	hypothetical protein	AKB53611.1	122.299	-0.28744	0.140687	0.00360417	0.0497691	Down	Yes
	hypothetical protein	AKB53449.1	198.074	-0.291595	0.129968	0.00244996	0.0396335	Down	Yes
	HTH DNA-binding protein	AKB54006.1	230.793	-0.291718	0.122468	0.00169617	0.0308529	Down	Yes
	Methylcobalamin:coenzyme M methyltransferase, methanol-specific	AKB55352.1	225.672	-0.2921	0.141484	0.00312701	0.0453481	Down	Yes
	Integral membrane protein	AKB55662.1	82.8653	-0.292929	0.123712	0.00184931	0.0328704	Down	Yes
	hypothetical protein	AKB55381.1	68.6624	-0.300082	0.124412	0.00149001	0.029852	Down	Yes
	Rubrerythrin	AKB54026.1	179.162	-0.305801	0.0817571	2.15e-05	0.00226165	Down	Yes
	hypothetical protein	AKB54617.1	134.906	-0.311379	0.151114	0.00310717	0.0452498	Down	Yes
	Glycosyltransferase	AKB55654.1	70.0435	-0.311701	0.135027	0.00188449	0.0333246	Down	Yes
	Trk system potassium uptake protein TrkA	AKB54303.1	158.429	-0.313012	0.120889	0.0008984	0.0235351	Down	Yes
	Ribosomal protein S6	AKB55441.1	108.603	-0.318054	0.143065	0.00217854	0.0361284	Down	Yes
	cell surface protein	AKB56280.1	637.973	-0.322347	0.15116	0.00271327	0.0418964	Down	Yes
	hypothetical protein	AKB56119.1	144.73	-0.323854	0.137618	0.00136577	0.0290221	Down	Yes
	Energy-conserving hydrogenase (ferredoxin), subunit F	AKB55809.1	79.1463	-0.325929	0.146158	0.00204872	0.0349796	Down	Yes
	hypothetical protein	AKB56217.1	503.424	-0.326307	0.124448	0.0007608	0.0217779	Down	Yes
	ABC1 family protein	AKB54040.1	41.1866	-0.328293	0.162483	0.0030255	0.0446229	Down	Yes
	hypothetical protein	AKB55117.1	87.3223	-0.335408	0.131182	0.00093322	0.0236099	Down	Yes
	ubiquinone/menaquinone biosynthesis methyltransferase	AKB55276.1	112.863	-0.335679	0.132336	0.00092496	0.0236099	Down	Yes
	hypothetical protein	AKB54259.1	234.928	-0.337699	0.161785	0.00200635	0.034597	Down	Yes
	hypothetical protein	AKB55624.1	212	-0.34265	0.145485	0.00135917	0.0290221	Down	Yes
	Methanol methyltransferase corrinoid protein	AKB55350.1	1549.14	-0.344815	0.143165	0.00080945	0.0217779	Down	Yes
	hypothetical protein	AKB54655.1	98.291	-0.347056	0.140083	0.00106513	0.0249441	Down	Yes
	Phospholipid-binding protein	AKB54513.1	111.036	-0.350894	0.105991	7.59e-05	0.00584781	Down	Yes
	hypothetical protein	AKB53740.1	86.2374	-0.35275	0.135287	0.00073927	0.0215319	Down	Yes
	Archaeal histone	AKB55873.1	117.813	-0.353239	0.167013	0.00196195	0.0341715	Down	Yes
	hypothetical protein	AKB56120.1	91.4074	-0.353619	0.141279	0.00098492	0.0240559	Down	Yes
	hypothetical protein	AKB54309.1	66.0751	-0.354476	0.132949	0.00061623	0.0194167	Down	Yes
	Rhodanese-like domain protein	AKB53833.1	62.6043	-0.363198	0.165422	0.00168117	0.0308529	Down	Yes
	Methylthiol:coenzyme M methyltransferase corrinoid protein	AKB54539.1	111.788	-0.366908	0.193584	0.00254276	0.0406139	Down	Yes
	hypothetical protein	AKB53803.1	63.2081	-0.369284	0.163418	0.00140638	0.0290221	Down	Yes
	Ubiquitin-like small archaeal modifier protein SAMP2	AKB55295.1	250.937	-0.369931	0.111154	6.38e-05	0.00538953	Down	Yes
	High-affnity carbon uptake protein Hat/HatR	AKB54713.1	107.84	-0.370872	0.133181	0.00039293	0.0146442	Down	Yes
	scaffold protein	AKB54253.1	239.045	-0.372275	0.179313	0.00218969	0.0361404	Down	Yes
	hypothetical protein	AKB53926.1	32.9558	-0.373601	0.150209	0.00092666	0.0236099	Down	Yes
	hypothetical protein	AKB54955.1	76.2013	-0.376657	0.150726	0.00086034	0.0229379	Down	Yes
	Methanol:corrinoid methyltransferase	AKB53300.1	430.118	-0.377312	0.170525	0.00139476	0.0290221	Down	Yes
	Ribosomal-protein-S18p-alanine acetyltransferase	AKB53042.1	148.089	-0.385536	0.118812	8.34e-05	0.00619705	Down	Yes
	Homoserine O-acetyltransferase	AKB54256.1	217.019	-0.38595	0.16917	0.00111566	0.0257312	Down	Yes
	hypothetical protein	AKB54023.1	105.581	-0.38622	0.172817	0.00140672	0.0290221	Down	Yes
	GPR1/FUN34/yaaH family protein	AKB56320.1	241.077	-0.39308	0.152392	0.00054617	0.017692	Down	Yes
	hypothetical protein	AKB55901.1	35.174	-0.39363	0.181915	0.00189446	0.033331	Down	Yes
	acidic integral membrane protein	AKB54671.1	31.5758	-0.396466	0.161895	0.00096635	0.0240559	Down	Yes
	Methanol:corrinoid methyltransferase	AKB55351.1	1936.82	-0.400597	0.220174	0.00255648	0.0406457	Down	Yes
	hypothetical protein	AKB55956.1	49.4861	-0.405984	0.226027	0.00282313	0.0425433	Down	Yes
	hypothetical protein	AKB55446.1	221.003	-0.409294	0.160719	0.00062628	0.0194856	Down	Yes
	hypothetical protein	AKB54661.1	188.134	-0.414228	0.131838	0.00010904	0.00697217	Down	Yes
	Inorganic pyrophosphatase	AKB53990.1	55.4382	-0.434863	0.210009	0.00167576	0.0308529	Down	Yes
	hypothetical protein	AKB54402.1	254.64	-0.434974	0.158642	0.00029853	0.0128607	Down	Yes
	hypothetical protein	AKB53343.1	31.5496	-0.437984	0.233006	0.00271416	0.0418964	Down	Yes
	hypothetical protein	AKB54468.1	163.014	-0.439514	0.0927613	1.66e-07	5.76e-05	Down	Yes
	ubiquinone/menaquinone biosynthesis methyltransferase	AKB54804.1	44.3645	-0.440781	0.145774	0.00015136	0.00850576	Down	Yes
	Putative glycogen debranching enzyme, archaeal type, TIGR01561	AKB54665.1	38.9998	-0.455272	0.195746	0.00099553	0.0240559	Down	Yes
	response regulator receiver	AKB53960.1	120.665	-0.463608	0.168849	0.00025453	0.0116723	Down	Yes
	Universal stress protein	AKB54762.1	42.0435	-0.46967	0.151877	0.00011957	0.00720908	Down	Yes
	Protein-disulfide reductase	AKB54404.1	586.284	-0.47082	0.20418	0.0007314	0.0215319	Down	Yes
	glycosyltransferase (group I)	AKB54724.1	88.7368	-0.474011	0.148156	7.48e-05	0.00584781	Down	Yes
	hypothetical protein	AKB54825.1	31.1235	-0.477937	0.234997	0.0017002	0.0308529	Down	Yes
	hypothetical protein	AKB54300.1	19.864	-0.480762	0.211706	0.00119068	0.0266252	Down	Yes
	ABC transporter, permease protein	AKB56238.1	79.7595	-0.481711	0.181979	0.00043291	0.0157786	Down	Yes
	hypothetical protein	AKB55880.1	91.6611	-0.485574	0.17401	0.0002653	0.0119419	Down	Yes
	hypothetical protein	AKB54401.1	29.0592	-0.486691	0.214649	0.0012182	0.027066	Down	Yes
	Phosphoglycerate kinase	AKB54921.1	22.9838	-0.494864	0.249979	0.00164828	0.0308529	Down	Yes
	hypothetical protein	AKB54721.1	48.2962	-0.498947	0.144821	3.16e-05	0.00321681	Down	Yes
	hypothetical protein	AKB55847.1	55.5388	-0.50589	0.180381	0.00023514	0.0110135	Down	Yes
	N5-methyltetrahydromethanopterin:coenzyme M methyltransferase subunit A	AKB53610.1	26.9651	-0.506473	0.220545	0.00100144	0.0240559	Down	Yes
	Cell surface protein	AKB53735.1	18.2239	-0.507259	0.277303	0.00278605	0.0423279	Down	Yes
	Transcriptional regulator, ArsR family	AKB54124.1	30.2605	-0.513335	0.187685	0.00033723	0.0135013	Down	Yes
	Heat shock protein	AKB55512.1	32.0508	-0.521943	0.216916	0.00062966	0.0194856	Down	Yes
	hypothetical protein	AKB54954.1	49.7534	-0.526389	0.176869	0.00016727	0.00891961	Down	Yes
	carboxymuconolactone decarboxylase	AKB55961.1	23.3036	-0.52674	0.310077	0.00273111	0.0418964	Down	Yes
	hypothetical protein	AKB55018.1	26.3101	-0.528092	0.234113	0.001257	0.0273728	Down	Yes
	Transcriptional regulator, FUR family	AKB55627.1	30.7721	-0.536341	0.213536	0.00052384	0.0171287	Down	Yes
	DUF378 domain-containing protein	AKB56093.1	25.1975	-0.536776	0.261983	0.00160253	0.0308529	Down	Yes
	Quinolinate synthetase	AKB54254.1	83.5311	-0.542857	0.293731	0.00178061	0.0319771	Down	Yes
	Cell surface protein	AKB54698.1	37.2345	-0.543757	0.217123	0.00049181	0.0165495	Down	Yes
	hypothetical protein	AKB54063.1	26.0214	-0.548777	0.178209	0.00010807	0.00697217	Down	Yes
	3-oxoacyl-[acyl-carrier protein] reductase	AKB55102.1	25.66	-0.551906	0.337441	0.00246995	0.0396335	Down	Yes
	hypothetical protein	AKB55529.1	64.2564	-0.552529	0.232217	0.00065722	0.0201585	Down	Yes
	hypothetical protein	AKB53394.1	17.5195	-0.561482	0.218405	0.00048432	0.0165495	Down	Yes
	Ribonucleotide reductase of class II (coenzyme B12-dependent)	AKB53986.1	22.4643	-0.572138	0.218176	0.00034301	0.01351	Down	Yes
	hypothetical protein	AKB53527.1	10.1118	-0.576157	0.37274	0.00350303	0.0489576	Down	Yes
	hypothetical protein	AKB54679.1	12.5064	-0.57699	0.342016	0.00273185	0.0418964	Down	Yes
	hypothetical protein	AKB55000.1	7.44845	-0.606808	0.358823	0.00264582	0.0418192	Down	Yes
	hypothetical protein	AKB55718.1	37.1544	-0.607274	0.214547	0.00021519	0.010655	Down	Yes
	Succinate-semialdehyde dehydrogenase [NAD]	AKB54672.1	45.3608	-0.623815	0.150771	1.62e-06	0.00036376	Down	Yes
	Pentapeptide repeat family protein	AKB54162.1	30.8353	-0.62622	0.29231	0.00078549	0.0217779	Down	Yes
	Amino acid transporter	AKB55258.1	9.00789	-0.631052	0.316427	0.00148527	0.029852	Down	Yes
	Dissimilatory sulfite reductase (desulfoviridin), alpha and beta subunits	AKB55860.1	35.3678	-0.637852	0.183992	2.13e-05	0.00226165	Down	Yes
	Secreted and surface protein containing fasciclin-like repeats	AKB54624.1	11.7041	-0.639154	0.326573	0.00159268	0.0308529	Down	Yes
	hypothetical protein	AKB54037.1	23.6011	-0.642362	0.241067	0.00025594	0.0116723	Down	Yes
	cell surface protein	AKB54841.1	15.3872	-0.64268	0.258151	0.00055761	0.0178952	Down	Yes
	hypothetical protein	AKB54027.1	13.388	-0.669822	0.278712	0.00049433	0.0165495	Down	Yes
	hypothetical protein	AKB56242.1	9.15969	-0.672916	0.354596	0.00158015	0.0308529	Down	Yes
	3'->5' exoribonuclease Bsu YhaM	AKB55546.1	9.06215	-0.681602	0.366598	0.00182543	0.0326131	Down	Yes
	dTDP-4-dehydrorhamnose 3,5-epimerase	AKB54031.1	289.079	-0.716322	0.211881	1.51e-05	0.0019711	Down	Yes
	hypothetical protein	AKB53908.1	59.1095	-0.735085	0.172496	9.83e-07	0.00024324	Down	Yes
	Mobile element protein	AKB54312.1	8.98476	-0.740339	0.339967	0.00102204	0.0242629	Down	Yes
	hypothetical protein	AKB53524.1	9.14946	-0.757656	0.43253	0.00157941	0.0308529	Down	Yes
	Galactose-1-phosphate uridylyltransferase	AKB55655.1	11.0171	-0.762691	0.316673	0.00049658	0.0165495	Down	Yes
	Ribosomal-protein-S18p-alanine acetyltransferase	AKB54753.1	17.9723	-0.764285	0.268143	0.00018137	0.00952445	Down	Yes
	Fmn-binding protein	AKB54032.1	500.387	-0.77457	0.154419	1.28e-08	1.11e-05	Down	Yes
	NADH dehydrogenase	AKB55952.1	7.49966	-0.793794	0.298948	0.00034793	0.0135498	Down	Yes
	Ribosomal-protein-S18p-alanine acetyltransferase	AKB55976.1	34.6622	-0.799266	0.218422	9.86e-06	0.00146596	Down	Yes
	Nickel insertion protein	AKB54033.1	2463.88	-0.871301	0.210932	5.43e-07	0.00015672	Down	Yes
	hypothetical protein	AKB55101.1	3.80773	-0.896636	0.689064	0.00360196	0.0497691	Down	Yes
	bi-functional transferase/deacetylase	AKB55362.1	126.899	-0.914775	0.187066	4.48e-08	1.94e-05	Down	Yes
	putative small heat shock protein	AKB56232.1	16.7371	-0.938581	0.27984	2.12e-05	0.00226165	Down	Yes
	hypothetical protein	AKB55652.1	4.03903	-0.959578	0.483415	0.00133571	0.0287552	Down	Yes
	Ferredoxin	AKB55063.1	12.0615	-0.96672	0.307323	6.08e-05	0.00526587	Down	Yes
	Eukaryotic peptide chain release factor subunit 1	AKB55628.1	87.8994	-0.970831	0.162936	7.96e-11	2.76e-07	Down	Yes	carbohydrate metabolism
	Universal stress protein	AKB54918.1	3.52373	-1.02175	0.548754	0.00158635	0.0308529	Down	Yes
	sensory transduction histidine kinase	AKB55361.1	47.0043	-1.08916	0.200813	2.35e-09	2.72e-06	Down	Yes
	hypothetical protein	AKB53377.1	45.5454	-1.10734	0.224186	2.35e-08	1.63e-05	Down	Yes
	3-oxoacyl-[acyl-carrier protein] reductase	AKB55103.1	9.34627	-1.12827	0.315208	8.37e-06	0.00138221	Down	Yes
	sensory transduction histidine kinase	AKB53717.1	3.82548	-1.66381	0.389382	9.63e-07	0.00024324	Down	Yes

## Sheet: 30˚C Mg.perchlorate (Table S6)
	Table S6. Significantly differentially expressed genes of M. barkeri at 30˚C supplemented with Mg(ClO4)2 (Wald test, P < 0.05). Differential expression is relative to the 30˚C perchlorate-free control.
	Abbreviations: ProteinID, GenBank protein accession number; baseMean, normalized transcript counts of all replicates normalized for sequencing depth;
	log2FoldChange, log2-fold change in expression of group relative to 30˚C perchlorate-free control; lfcSE, standard error of log2-fold change;
	padj, p-value adjusted for multiple testing using Benjamini-Hochberg correction.
Mg.perchlorate vs. Control	30˚C Mg.perchlorate vs. 30˚C Control
RowName	Protein	Protein ID	baseMean	log2FoldChange	lfcSE	pvalue	padj	regulation	Function {inferred from HHpred if hypothetical}	Metabolism
	hypothetical protein	AKB55019.1	4.91393	1.71216	0.696281	0.00048798	0.00918613	Up	Yes
FKBP-type peptidyl-prolyl cis-trans isomerase SlyD] [protein_id=AKB53721.1	Nitrogen regulatory protein P-II	AKB55786.1	79.4465	1.70616	0.273708	2.48e-11	4.86e-09	Up	Yes
hypothetical protein] [protein_id=AKB54190.1	Nitrogen regulatory protein P-II	AKB55785.1	73.3108	1.66804	0.249244	1.44e-12	3.69e-10	Up	Yes
Transcriptional regulator, Hth-3 family] [protein_id=AKB54890.1	Nitrogenase (molybdenum-iron) reductase and maturation protein NifH	AKB55784.1	317.067	1.56978	0.192985	1.75e-17	7.3e-15	Up	Yes
	hypothetical protein	AKB53130.1	6.46418	1.48545	0.822259	0.00185805	0.0251668	Up	Yes
	Flagellin FlaB1	AKB53692.1	4.5749	1.48015	0.66993	0.00086172	0.0142141	Up	Yes
	Transcriptional regulator, ArsR family	AKB55444.1	4.83207	1.47532	0.711113	0.00140799	0.0209439	Up	Yes
Iron(III) dicitrate-binding protein] [protein_id=AKB53821.1	hypothetical protein	AKB53131.1	21.4367	1.45821	0.4469	3.36e-05	0.0010675	Up	Yes
Ribosomal-protein-S18p-alanine acetyltransferase] [protein_id=AKB54753.1	Nitrogenase (molybdenum-iron) alpha chain	AKB55787.1	238.497	1.44524	0.186852	7.83e-16	2.61e-13	Up	Yes
hypothetical protein] [protein_id=AKB53250.1	Nitrogenase FeMo-cofactor scaffold and assembly protein NifE	AKB55789.1	134.127	1.41958	0.177423	5.48e-17	2.03e-14	Up	Yes
Nitrogenase (molybdenum-iron) reductase and maturation protein NifH] [protein_id=AKB55770.1	Dimethylamine permease	AKB53923.1	65.1375	1.34701	0.237296	3.99e-10	5.55e-08	Up	Yes
hypothetical protein] [protein_id=AKB56089.1	Ammonium transporter	AKB55164.1	201.644	1.34248	0.12466	1.87e-28	3.12e-25	Up	Yes
Nitrogenase FeMo-cofactor scaffold and assembly protein NifE] [protein_id=AKB55789.1	Nitrogenase (molybdenum-iron) beta chain	AKB55788.1	202.282	1.33161	0.148086	1.36e-20	6.46e-18	Up	Yes
GPR1/FUN34/yaaH family protein] [protein_id=AKB56320.1	Monomethylamine permease	AKB53145.1	15.8619	1.28373	0.383194	3.13e-05	0.00100381	Up	Yes
Ammonium transporter] [protein_id=AKB55164.1	Ammonium transporter	AKB53576.1	127.507	1.27374	0.177133	3.96e-14	1.2e-11	Up	Yes
Nitrogen regulatory protein P-II] [protein_id=AKB55165.1	Nitrogenase (molybdenum-iron) reductase and maturation protein NifH	AKB55770.1	164.238	1.22701	0.256795	8.89e-08	7.23e-06	Up	Yes	Nitrogen fixation
Phosphoenolpyruvate synthase] [protein_id=AKB54742.1	Dimethylamine permease	AKB53956.1	909.481	1.2147	0.366162	1.98e-05	0.00070008	Up	Yes
hypothetical protein] [protein_id=AKB54873.1	Ammonium transporter	AKB55798.1	352.988	1.2032	0.221112	2.59e-09	3.32e-07	Up	Yes
	Methyltransferase type 11	AKB53930.1	4.41578	1.19462	0.84631	0.00351286	0.0398124	Up	Yes
Substrate-specific component NikM of nickel ECF transporter] [protein_id=AKB56129.1	hypothetical protein	AKB54190.1	19934.2	1.1518	0.274652	1.32e-06	7.22e-05	Up	Yes
cell surface protein] [protein_id=AKB56280.1	Nitrogen regulatory protein P-II	AKB55797.1	84.1105	1.11315	0.230413	8.19e-08	6.99e-06	Up	Yes
	hypothetical protein	AKB55854.1	11.4522	1.09404	0.496927	0.00081449	0.0135843	Up	Yes
Serine acetyltransferase] [protein_id=AKB54248.1	Phosphinothricin N-acetyltransferase	AKB53633.1	16.6044	1.05778	0.339911	0.00010067	0.00256056	Up	Yes
haloacid dehalogenase-like hydrolase] [protein_id=AKB54310.1	Spermidine/putrescine-binding protein	AKB55998.1	48.0489	1.031	0.241735	1e-06	5.87e-05	Up	Yes
5'-methylthioadenosine phosphorylase] [protein_id=AKB54845.1	Dimethylamine:corrinoid methyltransferase	AKB53924.1	3716	0.962173	0.307092	6.03e-05	0.00171821	Up	Yes
Conserved transmembrane protein] [protein_id=AKB54846.1	anaerobic ribonucleoside-triphosphate reductase activating protein	AKB53927.1	31.9876	0.937573	0.242071	5.16e-06	0.0002386	Up	Yes
Iron(III) dicitrate-binding protein] [protein_id=AKB53820.1	Dimethylamine:corrinoid methyltransferase	AKB53455.1	3272.01	0.933575	0.285888	4.13e-05	0.00127308	Up	Yes
O-acetylhomoserine sulfhydrylase] [protein_id=AKB54255.1	Dimethylamine:corrinoid methyltransferase	AKB53955.1	4413.94	0.920568	0.301814	8.45e-05	0.00218161	Up	Yes
	Nitrogen regulatory protein P-II	AKB53575.1	13.5246	0.90638	0.386502	0.00079106	0.0133298	Up	Yes
	hypothetical protein	AKB54574.1	11.6041	0.891723	0.412191	0.00135614	0.0203543	Up	Yes
	hypothetical protein	AKB53943.1	12.2246	0.88118	0.370154	0.00079211	0.0133298	Up	Yes
V-type ATP synthase subunit I] [protein_id=AKB53593.1	Cytosolic Fe-S cluster assembling factor NBP35	AKB55089.1	69.4669	0.862924	0.202156	1.11e-06	6.27e-05	Up	Yes
hypothetical protein] [protein_id=AKB53444.1	FKBP-type peptidyl-prolyl cis-trans isomerase SlyD	AKB53721.1	73.2092	0.853566	0.177048	8.64e-08	7.2e-06	Up	Yes
Methanol:corrinoid methyltransferase] [protein_id=AKB53300.1	Monomethylamine permease	AKB53146.1	31.6809	0.846794	0.236768	1.9e-05	0.00067928	Up	Yes
Methyl coenzyme M reductase alpha subunit] [protein_id=AKB53099.1	cell surface protein	AKB56280.1	637.973	0.844799	0.204316	1.96e-06	0.00010212	Up	Yes	methanogenesis
putative Zn-ribbon RNA-binding protein with a function in translation] [protein_id=AKB54194.1	Choline permease LicB	AKB53457.1	168.58	0.829203	0.167781	4.76e-08	4.18e-06	Up	Yes
	hypothetical protein	AKB56087.1	16.6416	0.82899	0.338161	0.00071487	0.0125366	Up	Yes
PQQ enzyme repeat domain protein] [protein_id=AKB53654.1	Nitrogenase FeMo-cofactor scaffold and assembly protein NifN	AKB55790.1	62.9157	0.828627	0.225815	1.79e-05	0.00065724	Up	Yes
	hypothetical protein	AKB56317.1	40.7064	0.819976	0.381649	0.00144323	0.0212781	Up	Yes
	ATP-dependent DNA ligase	AKB55916.1	10.2931	0.813938	0.507896	0.0032606	0.0383898	Up	Yes
	Inorganic pyrophosphatase	AKB53990.1	55.4382	0.813013	0.283887	0.00020924	0.00452719	Up	Yes
hypothetical protein] [protein_id=AKB56080.1	response regulator receiver	AKB53960.1	120.665	0.799863	0.232509	3.13e-05	0.00100381	Up	Yes
Mn-dependent transcriptional regulator] [protein_id=AKB56101.1	Monomethylamine methyltransferase corrinoid protein	AKB53149.1	585.149	0.767324	0.148959	1.81e-08	1.83e-06	Up	Yes
hypothetical protein] [protein_id=AKB53950.1	Monomethylamine permease	AKB53147.1	197.307	0.767318	0.187965	2.37e-06	0.00011772	Up	Yes
	Mannose-6-phosphate isomerase	AKB53200.1	10.3757	0.765857	0.495123	0.0045593	0.0483808	Up	Yes
Inorganic pyrophosphatase] [protein_id=AKB53990.1	Monomethylamine:corrinoid methyltransferase	AKB54848.1	1592.88	0.752142	0.120183	2.78e-11	5.14e-09	Up	Yes	compounds with phosphate
protein identified by proteomics in Methanosarcina acetivorans (1)] [protein_id=AKB55318.1	Monomethylamine:corrinoid methyltransferase	AKB53148.1	1609.85	0.748609	0.119888	3.09e-11	5.42e-09	Up	Yes
Thymidylate synthase] [protein_id=AKB55418.1	Glycine betaine ABC transport system, permease protein OpuAB	AKB54224.1	45.4575	0.730849	0.201314	1.73e-05	0.00064134	Up	Yes
	hypothetical protein	AKB55548.1	32.4515	0.727473	0.266264	0.00032238	0.00654978	Up	Yes
Phycocyanin alpha phycocyanobilin lyase] [protein_id=AKB55518.1	Cell surface protein	AKB55391.1	34.7829	0.725484	0.221135	6.64e-05	0.00182911	Up	Yes
ATP phosphoribosyltransferase] [protein_id=AKB53239.1	Monomethylamine methyltransferase corrinoid protein	AKB54849.1	542.022	0.725343	0.152087	1.49e-07	1.03e-05	Up	Yes
	chloramphenicol O-acetyltransferase	AKB54365.1	15.2849	0.724236	0.36926	0.00243712	0.0301876	Up	Yes
pyridoxamine 5'-phosphate oxidase, FMN-binding family] [protein_id=AKB54627.1	Nitrogen regulatory protein P-II	AKB55165.1	74.2899	0.722762	0.182618	5.78e-06	0.00025681	Up	Yes
Fmn-binding protein] [protein_id=AKB54032.1	Dimethylamine methyltransferase corrinoid protein	AKB53925.1	675.398	0.718677	0.219519	6.26e-05	0.00174552	Up	Yes
	Universal stress protein	AKB54493.1	31.2296	0.712379	0.269503	0.00052934	0.0097446	Up	Yes
	hypothetical protein	AKB55956.1	49.4861	0.702652	0.303058	0.0010058	0.0158831	Up	Yes
	hypothetical protein	AKB53444.1	216.989	0.699666	0.226013	0.00012201	0.0029798	Up	Yes
putative transporter PduT for various metalloporphyrins] [protein_id=AKB53513.1	hypothetical protein	AKB54856.1	105.724	0.698797	0.158951	7.82e-07	4.74e-05	Up	Yes
Molybdenum transport system permease protein ModB] [protein_id=AKB55167.1	Dimethylamine methyltransferase corrinoid protein	AKB53954.1	1004.65	0.695363	0.206184	4.88e-05	0.00145116	Up	Yes
Cysteine synthase] [protein_id=AKB54249.1	hypothetical protein	AKB53701.1	53.7334	0.689423	0.213216	9.33e-05	0.00239143	Up	Yes
	CrcB protein	AKB56061.1	25.3947	0.679908	0.340554	0.00224337	0.0285303	Up	Yes
	Glycine betaine ABC transport system, glycine betaine-binding protein OpuAC	AKB54225.1	18.9284	0.675018	0.303471	0.00166381	0.0231958	Up	Yes
	sensory transduction histidine kinase	AKB55361.1	47.0043	0.665916	0.311521	0.00190108	0.0254627	Up	Yes
	hypothetical protein	AKB53194.1	84.3716	0.663	0.238334	0.00033224	0.0067092	Up	Yes
Cell division protein FtsJ] [protein_id=AKB54297.1	Cell division protein FtsX	AKB53967.1	134.612	0.661501	0.138657	1.56e-07	1.06e-05	Up	Yes
	TPR-domain containing protein	AKB55671.1	20.319	0.65279	0.312789	0.00226577	0.0287055	Up	Yes
	hypothetical protein	AKB53759.1	258.955	0.646901	0.218135	0.00025054	0.0053857	Up	Yes
hypothetical protein] [protein_id=AKB55640.1	cell surface protein	AKB54803.1	295.907	0.645255	0.144602	6.62e-07	4.08e-05	Up	Yes
Chitin binding protein] [protein_id=AKB53315.1	Glycine betaine ABC transport system, ATP-binding protein OpuAA	AKB54223.1	237.228	0.642833	0.170932	1.18e-05	0.00045352	Up	Yes
Iron(III) dicitrate transport system permease protein] [protein_id=AKB53823.1	Cell division protein FtsX	AKB54857.1	77.0803	0.616575	0.144389	1.84e-06	9.76e-05	Up	Yes
	hypothetical protein	AKB54360.1	76.3965	0.610998	0.216922	0.00042678	0.00821982	Up	Yes
Oligopeptide transport system permease protein OppB] [protein_id=AKB53684.1	Thiamine-monophosphate kinase	AKB56465.1	596.808	0.610799	0.169279	2.89e-05	0.00094505	Up	Yes
Amino acid permease] [protein_id=AKB53978.1	hypothetical protein	AKB53968.1	171.622	0.606737	0.176782	5.66e-05	0.00163941	Up	Yes
	Chloramphenicol acetyltransferase	AKB54990.1	27.8775	0.599321	0.235792	0.00093614	0.0152157	Up	Yes
	Nitrogenase vanadium-cofactor synthesis protein VnfE	AKB54349.1	23.3547	0.588635	0.273029	0.00249294	0.0305385	Up	Yes
	ABC transporter, ATP-binding protein	AKB54855.1	90.2054	0.587478	0.215688	0.00052388	0.0097446	Up	Yes
	Cysteine desulfurase	AKB53313.1	122.221	0.581841	0.201385	0.00035161	0.00701531	Up	Yes
	hypothetical protein	AKB54661.1	188.134	0.567588	0.185782	0.00018747	0.00416424	Up	Yes
	Fumarate hydratase class I, aerobic	AKB54581.1	27.4294	0.560517	0.244739	0.00206193	0.0267329	Up	Yes
	Long-chain-fatty-acid--CoA ligase	AKB55686.1	28.8905	0.557493	0.240032	0.00177021	0.0244744	Up	Yes
	MFS permease	AKB53608.1	35.1202	0.556259	0.234903	0.00171379	0.0237931	Up	Yes
	bi-functional transferase/deacetylase	AKB55362.1	126.899	0.55221	0.283637	0.00396111	0.0431469	Up	Yes
	Tetracycline resistance protein	AKB53182.1	41.5242	0.544107	0.237938	0.0019775	0.025941	Up	Yes
	Peptidyl-prolyl cis-trans isomerase	AKB53722.1	44.6692	0.541506	0.233689	0.001844	0.0250784	Up	Yes
2-oxoglutarate oxidoreductase, alpha subunit] [protein_id=AKB55213.1	ATP phosphoribosyltransferase	AKB53239.1	321.515	0.541383	0.121678	8.94e-07	5.32e-05	Up	Yes	carbon metabolism?
	Coenzyme F420:L-glutamate ligase	AKB53138.1	50.1862	0.537692	0.215414	0.00112345	0.0174109	Up	Yes
	DNA primase small subunit	AKB55885.1	80.5723	0.536514	0.165499	0.00012252	0.0029798	Up	Yes
Methylcobalamin:coenzyme M methyltransferase, methanol-specific] [protein_id=AKB56311.1	MoxR-related protein	AKB53337.1	89.3542	0.536184	0.142084	1.83e-05	0.00066417	Up	Yes
Transcriptional regulator, MerR family] [protein_id=AKB54924.1	Formylmethanofuran dehydrogenase (molybdenum) subunit D	AKB53391.1	290.721	0.519194	0.153711	7.68e-05	0.00203013	Up	Yes
Homoserine O-acetyltransferase] [protein_id=AKB54256.1	Formylmethanofuran dehydrogenase (molybdenum) subunit D	AKB53640.1	290.721	0.519194	0.153711	7.68e-05	0.00203013	Up	Yes
	hypothetical protein	AKB55069.1	28.2355	0.511413	0.251018	0.00396247	0.0431469	Up	Yes
Oligopeptide ABC transporter, periplasmic oligopeptide-binding protein OppA] [protein_id=AKB55846.1	FmdE, Molybdenum formylmethanofuran dehydrogenase operon	AKB53387.1	496.786	0.509511	0.124721	5.3e-06	0.00024212	Up	Yes
	Protein-L-isoaspartate O-methyltransferase	AKB53445.1	55.1175	0.495034	0.230759	0.00327782	0.0384567	Up	Yes
	glycosyltransferase (group I)	AKB54724.1	88.7368	0.48354	0.210522	0.00220029	0.0283065	Up	Yes
hypothetical protein] [protein_id=AKB55519.1	Proline 2-methylase for pyrrolysine biosynthesis	AKB53154.1	301.054	-0.623815	0.141177	7.62e-05	0.00203013	Up	Yes
	putative metal dependent hydrolase	AKB53366.1	69.0846	0.481138	0.159138	0.00032133	0.00654978	Up	Yes
	ABC transporter, solute-binding protein	AKB53386.1	103.328	0.477864	0.173403	0.00073518	0.0127585	Up	Yes
	Cytochrome d ubiquinol oxidase subunit II	AKB55625.1	138.209	0.476961	0.185103	0.00110694	0.0172352	Up	Yes
Rubrerythrin] [protein_id=AKB55701.1	Hydroxymethylglutaryl-CoA reductase	AKB53691.1	242.991	0.473109	0.119317	1.1e-05	0.00043254	Up	Yes
Vitamin B12 ABC transporter, permease component BtuC] [protein_id=AKB56079.1	Polyferredoxin protein MvhB	AKB53637.1	1860.7	0.464004	0.128738	4.26e-05	0.00130205	Up	Yes
ABC transporter, permease protein] [protein_id=AKB54065.1	Polyferredoxin protein MvhB	AKB53388.1	1869.36	0.463072	0.129022	4.52e-05	0.00136815	Up	Yes
	hypothetical protein	AKB56240.1	79.7187	0.460852	0.151674	0.00034696	0.00696436	Up	Yes
	hypothetical protein	AKB53816.1	1548.49	0.457753	0.147861	0.00026936	0.00564351	Up	Yes
	hypothetical protein	AKB55247.1	29.5195	0.454308	0.220508	0.00463473	0.04887	Up	Yes
	hypothetical protein	AKB54230.1	88.9519	0.442552	0.155862	0.00064185	0.0113977	Up	Yes
	Formylmethanofuran dehydrogenase (molybdenum) subunit B	AKB53641.1	999.916	0.442303	0.137491	0.00018303	0.00412896	Up	Yes
hypothetical protein] [protein_id=AKB55904.1	2-isopropylmalate synthase	AKB56184.1	303.964	0.442141	0.1131	1.38e-05	0.00052348	Up	Yes
	Sugar phosphate isomerase/epimerase	AKB53359.1	142.865	0.439799	0.179204	0.00191688	0.0254627	Up	Yes
	Phosphoribosylformimino-5-aminoimidazole carboxamide ribotide isomerase	AKB53240.1	114.369	0.435203	0.160219	0.00098589	0.0157705	Up	Yes
	Isopentenyl-diphosphate delta-isomerase, FMN-dependent	AKB53483.1	150.118	0.429976	0.13005	0.00016099	0.00369943	Up	Yes
	tRNAHis-5'-guanylyltransferase	AKB55946.1	43.4796	0.421263	0.190005	0.00367795	0.0412624	Up	Yes
	Triosephosphate isomerase	AKB53066.1	205.713	0.416916	0.124405	0.00013923	0.00329025	Up	Yes
anaerobic ribonucleoside-triphosphate reductase activating protein] [protein_id=AKB53927.1	Glutamate synthase [NADPH] large chain	AKB56227.1	846.336	0.416628	0.0746733	4.7e-09	5.8e-07	Up	Yes
	DNA-directed RNA polymerase subunit H	AKB53882.1	659.333	0.409159	0.169563	0.00248231	0.0305205	Up	Yes
	His-Xaa-Ser system radical SAM maturase HxsC	AKB55680.1	90.9055	0.407073	0.148291	0.00098267	0.0157705	Up	Yes
	DNA-binding HTH domain in riboflavin kinase	AKB53441.1	122.256	0.400606	0.179982	0.00381536	0.0422352	Up	Yes
	hypothetical protein	AKB56098.1	113.177	0.399742	0.170328	0.00298833	0.0356886	Up	Yes
	Carbon monoxide dehydrogenase CooS subunit	AKB55315.1	235.824	0.398975	0.133844	0.00043203	0.00822593	Up	Yes
	Trimethylamine methyltransferase corrinoid protein	AKB53458.1	69.3048	0.397459	0.180901	0.00470914	0.049498	Up	Yes
4-aminobutyrate aminotransferase] [protein_id=AKB54235.1	Formylmethanofuran dehydrogenase subunit A	AKB53389.1	1668.15	0.395892	0.103792	2.59e-05	0.0008778	Up	Yes
Oligopeptide ABC transporter, periplasmic oligopeptide-binding protein OppA] [protein_id=AKB54088.1	Formylmethanofuran dehydrogenase subunit A	AKB53638.1	1668.07	0.395783	0.103801	2.61e-05	0.0008778	Up	Yes
	(dimethylallyl)adenosine tRNA methylthiotransferase	AKB55539.1	147.299	0.395428	0.152331	0.00147537	0.0214359	Up	Yes
	Formylmethanofuran dehydrogenase (molybdenum) subunit C	AKB53639.1	639.128	0.390795	0.132179	0.00056912	0.01038	Up	Yes
	Formylmethanofuran dehydrogenase (molybdenum) subunit C	AKB53390.1	639.123	0.390741	0.132182	0.00057009	0.01038	Up	Yes
	hypothetical protein	AKB55363.1	613.138	0.387265	0.135922	0.00077429	0.0132338	Up	Yes
PQQ enzyme repeat domain protein] [protein_id=AKB53655.1	Sterol-regulatory element-binding protein intramembrane protease	AKB55139.1	395.1	0.386548	0.0956874	1.1e-05	0.00043254	Up	Yes
	hypothetical protein	AKB56237.1	86.2798	0.38515	0.142565	0.00131703	0.0199203	Up	Yes
Cysteine desulfurase] [protein_id=AKB54252.1	Methylcobalamin:coenzyme M methyltransferase, methylamine-specific	AKB53150.1	1200.59	0.381211	0.11209	0.00011305	0.00281111	Up	Yes
	Mobile element protein	AKB53290.1	116.967	0.375425	0.152211	0.00242398	0.0301369	Up	Yes
	Mobile element protein	AKB53831.1	116.967	0.375425	0.152211	0.00242398	0.0301369	Up	Yes
	Mobile element protein	AKB54673.1	116.967	0.375425	0.152211	0.00242398	0.0301369	Up	Yes
	Putative deoxyribonuclease YcfH	AKB53059.1	119.886	0.370297	0.15339	0.00284181	0.0341838	Up	Yes
	Mobile element protein	AKB55022.1	116.721	0.369825	0.151725	0.00270432	0.0327666	Up	Yes
	hypothetical protein	AKB56302.1	70.4588	0.367875	0.162719	0.00429591	0.0458781	Up	Yes
	hypothetical protein	AKB54022.1	295.155	0.362804	0.139907	0.00192575	0.0254627	Up	Yes
	Formylmethanofuran dehydrogenase (molybdenum) subunit B	AKB53392.1	1523.5	0.355891	0.131946	0.00123185	0.0189149	Up	Yes
	S-layer family duplication domain protein	AKB56466.1	2761.09	0.354271	0.106286	0.00020721	0.00451252	Up	Yes
	Glutamine synthetase type I	AKB56229.1	521.192	0.353256	0.112812	0.00042064	0.00814863	Up	Yes
	hypothetical protein	AKB54468.1	163.014	0.352556	0.130468	0.00146764	0.0214359	Up	Yes
	PUA-PAPS reductase like fusion	AKB56122.1	401.93	0.33363	0.105433	0.00041205	0.00802902	Up	Yes
	Hydrogenase expression/formation protein	AKB53858.1	309.056	0.326421	0.116654	0.0012645	0.0193271	Up	Yes
	Hydantoinase	AKB54991.1	185.222	0.316003	0.13194	0.00413844	0.044462	Up	Yes
	Ferredoxin	AKB53283.1	1783.57	0.31534	0.1254	0.00302305	0.0359743	Up	Yes
	Trimethylamine:corrinoid methyltransferase	AKB53459.1	223.701	0.315242	0.11898	0.00230657	0.0291116	Up	Yes
	SSU ribosomal protein S19e	AKB56019.1	1253.01	0.313761	0.11698	0.00204952	0.0266757	Up	Yes
	tRNA N2,N2-dimethyl(Guanine26-N2)-methyltransferase	AKB54865.1	169.169	0.296186	0.116261	0.00324065	0.0382902	Up	Yes
	DNA-directed RNA polymerase subunit B''	AKB53883.1	1497.42	0.292154	0.11247	0.00279874	0.0337876	Up	Yes
	O-phosphoseryl-tRNA(Cys) synthetase	AKB56439.1	461.538	0.272632	0.107458	0.00365974	0.0412282	Up	Yes
	Molybdopterin biosynthesis protein MoeA	AKB56137.1	351.7	0.267689	0.0923794	0.00152761	0.0219397	Up	Yes
	Inosine-5'-monophosphate dehydrogenase	AKB53032.1	770.008	0.266879	0.0988141	0.00247093	0.0304931	Up	Yes
	archaeosine tRNA-ribosyltransferase type 1	AKB56342.1	283.276	0.23917	0.0912005	0.00394474	0.0431469	Up	Yes
	Orotate phosphoribosyltransferase related protein	AKB53854.1	340.744	-0.237666	0.0919945	0.0041025	0.0442379	Down	Yes
	Pyrophosphate-energized proton pump	AKB55771.1	798.966	-0.238824	0.0930973	0.00441941	0.0470463	Down	Yes
	Translation elongation factor 1 alpha subunit	AKB53892.1	3137.5	-0.296401	0.122663	0.00479986	0.0499785	Down	Yes
	Chitin binding protein	AKB54545.1	344.367	-0.318152	0.117518	0.00182068	0.024965	Down	Yes
	V-type ATP synthase subunit A	AKB53588.1	3514.9	-0.322188	0.133926	0.00407942	0.0442379	Down	Yes
	Methanophenazine hydrogenase large subunit	AKB55558.1	3041.36	-0.322434	0.119564	0.00190581	0.0254627	Down	Yes
	Branched-chain amino acid aminotransferase	AKB56138.1	246.951	-0.323687	0.109905	0.00089113	0.0145551	Down	Yes
	Oligopeptide ABC transporter, periplasmic oligopeptide-binding protein OppA	AKB53686.1	105.912	-0.343732	0.142662	0.00347546	0.0396584	Down	Yes
	hypothetical protein	AKB54408.1	105.579	-0.345454	0.137484	0.00270328	0.0327666	Down	Yes
	Archaeal S-adenosylmethionine synthetase	AKB53238.1	225.755	-0.349744	0.138412	0.00263745	0.0321904	Down	Yes
	hypothetical protein	AKB55960.1	94.4527	-0.350772	0.146486	0.00366253	0.0412282	Down	Yes
	Seryl-tRNA synthetase	AKB56107.1	437.768	-0.35265	0.147133	0.00345819	0.0395969	Down	Yes
	V-type ATP synthase subunit I	AKB53593.1	5339.9	-0.355321	0.112704	0.00039497	0.00778714	Down	Yes
methyltransferase, UbiE/COQ5 family] [protein_id=AKB56081.1	Coenzyme B synthesis from 2-oxoglutarate: steps 1, 6, and 10	AKB55237.1	662.019	-0.356491	0.0959237	4.81e-05	0.00144308	Down	Yes
	Thioredoxin	AKB56193.1	214.923	-0.359689	0.133725	0.00160905	0.0227176	Down	Yes
	Ubiquitin-like small archaeal modifier protein SAMP2	AKB55295.1	250.937	-0.359996	0.15145	0.00341136	0.0394675	Down	Yes
	putative low-affinity inorganic phosphate transporter	AKB55106.1	107.32	-0.367539	0.154606	0.00344456	0.0395769	Down	Yes
	Thiamin biosynthesis protein ThiC	AKB56158.1	1975.49	-0.383161	0.112882	0.0001519	0.00353942	Down	Yes
	Potassium channel protein	AKB54652.1	157.628	-0.384215	0.135067	0.00088068	0.0144553	Down	Yes
	hypothetical protein	AKB54720.1	128.902	-0.384507	0.128605	0.00058719	0.0106332	Down	Yes
	LSU ribosomal protein L12a (P1/P2)	AKB56172.1	242.554	-0.389265	0.169997	0.00386806	0.0426768	Down	Yes
	hypothetical protein	AKB53916.1	148.635	-0.389527	0.135496	0.00072773	0.0126952	Down	Yes
	Methyl coenzyme M reductase alpha subunit	AKB53099.1	7719.34	-0.398994	0.15659	0.00194901	0.0256684	Down	Yes
	Inosine-5'-monophosphate dehydrogenase	AKB55421.1	231.772	-0.400523	0.139653	0.00077449	0.0132338	Down	Yes
	V-type ATP synthase subunit B	AKB53587.1	2893.91	-0.406598	0.124239	0.00020076	0.00440091	Down	Yes
	Cobyrinic acid A,C-diamide synthase	AKB56379.1	150.976	-0.41105	0.130144	0.00029767	0.0061604	Down	Yes
	hypothetical protein	AKB53950.1	6613.52	-0.415411	0.180356	0.00335922	0.0391361	Down	Yes
	iron-sulfur flavoprotein	AKB53501.1	90.223	-0.421227	0.166588	0.00181093	0.024934	Down	Yes
	cell surface protein	AKB54941.1	716.198	-0.428546	0.168686	0.00182889	0.0249748	Down	Yes
	V-type ATP synthase subunit K	AKB53592.1	751.684	-0.431827	0.167868	0.00147967	0.0214359	Down	Yes
	V-type ATP synthase subunit K	AKB53582.1	748.547	-0.432499	0.167557	0.00144168	0.0212781	Down	Yes
	hypothetical protein	AKB54721.1	48.2962	-0.443609	0.201613	0.00349856	0.0397856	Down	Yes
	V-type ATP synthase subunit G	AKB53594.1	383.18	-0.444897	0.181022	0.00201694	0.0263547	Down	Yes
		AKB53518.1	94.0084	-0.445642	0.186737	0.00237816	0.029902	Down	Yes
	Fe-S oxidoreductase	AKB53462.1	59.2737	-0.448088	0.175947	0.0014685	0.0214359	Down	Yes
	bifunctional phosphopantothenoylcysteine decarboxylase/phosphopantothenate synthase	AKB55700.1	144.767	-0.448849	0.177586	0.00156878	0.0223384	Down	Yes
	Oligopeptide ABC transporter, periplasmic oligopeptide-binding protein OppA	AKB53384.1	322.667	-0.450002	0.212353	0.00414997	0.044462	Down	Yes
	cell surface protein	AKB54940.1	680.52	-0.450788	0.175313	0.00139021	0.0207721	Down	Yes
	Putative snRNP Sm-like protein	AKB54278.1	115.524	-0.454484	0.161564	0.00062978	0.0112818	Down	Yes
	hypothetical protein	AKB56223.1	131.519	-0.455149	0.210129	0.00381386	0.0422352	Down	Yes
	hypothetical protein	AKB55517.1	166.468	-0.455216	0.167669	0.00097185	0.0157195	Down	Yes
	Tryptophan synthase beta chain 1	AKB54276.1	164.853	-0.457462	0.145984	0.00026379	0.00559846	Down	Yes
	2-phospho-L-lactate transferase	AKB53531.1	122.887	-0.464377	0.168104	0.00081946	0.0135843	Down	Yes
	cell surface glycoprotein	AKB54068.1	39.5916	-0.474635	0.237261	0.00475663	0.04984	Down	Yes
	hypothetical protein	AKB53713.1	113.018	-0.477624	0.165177	0.00048302	0.0091444	Down	Yes
	Conserved transmembrane protein	AKB54846.1	215.226	-0.477977	0.153948	0.000271	0.00564351	Down	Yes
scaffold protein] [protein_id=AKB54253.1	Substrate-specific component NikM of nickel ECF transporter	AKB56129.1	604.433	-0.47956	0.143577	0.00011182	0.00280131	Down	Yes
	hypothetical protein	AKB54123.1	86.5141	-0.480102	0.191679	0.00154001	0.0220228	Down	Yes
	Sensory transduction histidine kinase	AKB56308.1	63.558	-0.48254	0.216464	0.00285493	0.0342181	Down	Yes
Quinolinate synthetase] [protein_id=AKB54254.1	Iron(III) dicitrate transport system permease protein	AKB53823.1	237.032	-0.484263	0.14374	0.00010607	0.00267752	Down	Yes
	pyridoxamine 5'-phosphate oxidase, FMN-binding family	AKB53443.1	103.436	-0.487426	0.196434	0.00157853	0.0223816	Down	Yes
	4-aminobutyrate aminotransferase	AKB54235.1	31.7559	-0.502476	0.249603	0.00389155	0.0427942	Down	Yes
	hypothetical protein	AKB54259.1	234.928	-0.503123	0.218171	0.00192527	0.0254627	Down	Yes
	Rubrerythrin	AKB55701.1	75.3422	-0.507359	0.197207	0.0010809	0.0169088	Down	Yes
	2-amino-3,7-dideoxy-D-threo-hept-6-ulosonate synthase	AKB53073.1	148.886	-0.509277	0.240681	0.00335871	0.0391361	Down	Yes
	hypothetical protein	AKB56264.1	165.377	-0.509735	0.179799	0.00052763	0.0097446	Down	Yes
	hypothetical protein	AKB54960.1	38.3947	-0.511708	0.220362	0.00221268	0.0283416	Down	Yes
	hypothetical protein	AKB55795.1	56.8815	-0.514267	0.251502	0.00377741	0.0420948	Down	Yes
	Transcriptional regulator, ArsR family	AKB54205.1	46.4566	-0.515995	0.216559	0.00166375	0.0231958	Down	Yes
	Phosphoenolpyruvate synthase	AKB54742.1	345.264	-0.517269	0.187602	0.00064309	0.0113977	Down	Yes
Methanol:corrinoid methyltransferase] [protein_id=AKB56319.1	ubiquinone/menaquinone biosynthesis methyltransferase	AKB56034.1	115.512	-0.518332	0.149742	6.74e-05	0.0018409	Down	Yes
Dipeptide-binding ABC transporter, periplasmic substrate-binding component] [protein_id=AKB53218.1	hypothetical protein	AKB55217.1	418.363	-0.525534	0.129635	6.64e-06	0.00028026	Down	Yes
	hypothetical protein	AKB53656.1	59.4684	-0.52886	0.208654	0.00099394	0.0157705	Down	Yes
Tryptophan synthase beta chain 1] [protein_id=AKB54276.1	Chitin binding protein	AKB55149.1	505.855	-0.53007	0.119755	1.31e-06	7.22e-05	Down	Yes	amino acid biosynthesis
	Dipeptide transport system permease protein DppB	AKB53219.1	60.6902	-0.537138	0.20618	0.00099127	0.0157705	Down	Yes
	hypothetical protein	AKB53682.1	104.304	-0.538946	0.179395	0.00026555	0.00560011	Down	Yes
	hypothetical protein	AKB54617.1	134.906	-0.552538	0.205695	0.00060548	0.0109051	Down	Yes
	UDP-glucose dehydrogenase	AKB53763.1	115.924	-0.553937	0.171244	0.00012419	0.00299859	Down	Yes
Nitrogenase (molybdenum-iron) alpha chain] [protein_id=AKB55787.1	haloacid dehalogenase-like hydrolase	AKB54310.1	1117.02	-0.557324	0.0979961	1.11e-09	1.48e-07	Down	Yes	nitrogen fixation
	Cell surface glycoprotein	AKB54937.1	63.7068	-0.567836	0.27647	0.0030579	0.0362595	Down	Yes
	Methanol:corrinoid methyltransferase	AKB55351.1	1936.82	-0.570291	0.294895	0.00342801	0.0395229	Down	Yes
	pyridoxamine 5'-phosphate oxidase, FMN-binding family	AKB54627.1	168.338	-0.580914	0.187485	0.00018639	0.00416424	Down	Yes
	hypothetical protein	AKB54825.1	31.1235	-0.582055	0.324866	0.00479718	0.0499785	Down	Yes
	Phosphate transport system permease protein PstC	AKB53663.1	110.189	-0.582259	0.182436	0.00012978	0.00311096	Down	Yes
Methanol methyltransferase corrinoid protein] [protein_id=AKB56318.1	hypothetical protein	AKB56217.1	503.424	-0.584607	0.170869	6.94e-05	0.0018811	Down	Yes
	Vitamin B12 ABC transporter, B12-binding component BtuF	AKB54996.1	39.5478	-0.593527	0.258295	0.00150334	0.0216846	Down	Yes
	putative transcriptional regulator with an HTH domain protein	AKB56467.1	52.9074	-0.595845	0.210381	0.00043134	0.00822593	Down	Yes
	Methanol methyltransferase corrinoid protein	AKB55350.1	1549.14	-0.597584	0.195374	0.00019224	0.004242	Down	Yes
CobN-like chelatase BtuS for metalloporphyrine salvage] [protein_id=AKB53516.1	Iron(III) dicitrate-binding protein	AKB53822.1	361.969	-0.606256	0.144618	3.09e-06	0.0001513	Down	Yes
	Indole-3-glycerol phosphate synthase	AKB54953.1	49.8173	-0.612477	0.233174	0.00070147	0.0123667	Down	Yes
	Iron(III) dicitrate transport ATP-binding protein FecE	AKB56031.1	25.6243	-0.616053	0.260252	0.00131885	0.0199203	Down	Yes
hypothetical protein] [protein_id=AKB55520.1	Ribosomal RNA adenine dimethylase	AKB53683.1	99.2742	-0.616219	0.184746	8.36e-05	0.002175	Down	Yes
	Ferredoxin	AKB55420.1	100.289	-0.617895	0.298218	0.00209996	0.0271204	Down	Yes
	Methanol:corrinoid methyltransferase	AKB53300.1	430.118	-0.62008	0.230314	0.00049276	0.00922396	Down	Yes
cell surface protein] [protein_id=AKB54803.1	hypothetical protein	AKB55621.1	2012.1	-0.628553	0.128717	1.21e-07	9.07e-06	Down	Yes
	Phosphatidylethanolamine N-methyltransferase	AKB56030.1	19.5892	-0.630774	0.295393	0.00222004	0.0283416	Down	Yes
	V-type ATP synthase subunit D	AKB53586.1	695.884	-0.635202	0.198347	0.00011754	0.00290099	Down	Yes
Methanol methyltransferase corrinoid protein] [protein_id=AKB53301.1	periplasmic binding protein	AKB56033.1	87.1739	-0.637852	0.190258	6.29e-05	0.00174552	Down	Yes
Monomethylamine:corrinoid methyltransferase] [transl_except=(pos:604..606,aa:Pyl)] [protein_id=AKB54848.1	Cation-transporting ATPase, E1-E2 family	AKB54977.1	287.841	-0.639252	0.121498	1.45e-08	1.61e-06	Down	Yes
	cell surface protein	AKB54061.1	93.2174	-0.646868	0.283539	0.00165906	0.0231958	Down	Yes
	ubiquinone/menaquinone biosynthesis methyltransferase	AKB53900.1	26.5513	-0.649705	0.255493	0.00078791	0.0133298	Down	Yes
	hypothetical protein	AKB55133.1	12.5627	-0.651142	0.360926	0.00370644	0.0414425	Down	Yes
	Ferredoxin	AKB55823.1	89.4807	-0.653887	0.388596	0.00409545	0.0442379	Down	Yes
Methanol methyltransferase corrinoid protein] [protein_id=AKB55350.1	bifunctional 3-demethylubiquinone-9 3-methyltransferase/ 2-octaprenyl-6-hydroxy phenol methylase	AKB53897.1	257.171	-0.659533	0.182547	2.59e-05	0.0008778	Down	Yes
	hypothetical protein	AKB56105.1	57.609	-0.66186	0.215359	0.00015714	0.00363615	Down	Yes
UDP-glucose dehydrogenase] [protein_id=AKB53763.1	Oligopeptide ABC transporter, periplasmic oligopeptide-binding protein OppA	AKB54088.1	106.054	-0.669417	0.163282	3.95e-06	0.00019085	Down	Yes
Iron(III) dicitrate-binding protein] [protein_id=AKB53822.1	hypothetical protein	AKB53657.1	200.656	-0.673442	0.155923	1.38e-06	7.42e-05	Down	Yes
pyridoxamine 5'-phosphate oxidase, FMN-binding family] [protein_id=AKB53443.1	Methylcobalamin:coenzyme M methyltransferase, methanol-specific	AKB56311.1	344.629	-0.67411	0.174349	1.04e-05	0.00041837	Down	Yes
	Thymidylate synthase	AKB55418.1	56.0259	-0.682412	0.275617	0.00077237	0.0132338	Down	Yes
hypothetical protein] [protein_id=AKB55214.1	Iron(III) dicitrate transport ATP-binding protein	AKB53824.1	86.1331	-0.683111	0.180079	1.14e-05	0.00044162	Down	Yes
	hypothetical protein	AKB55619.1	22.4992	-0.690952	0.36289	0.00337363	0.0391671	Down	Yes
	Oligopeptide transport system permease protein OppB	AKB54090.1	52.4954	-0.691727	0.237449	0.00026039	0.00556167	Down	Yes
hypothetical protein] [protein_id=AKB53512.1	GPR1/FUN34/yaaH family protein	AKB56320.1	241.077	-0.692126	0.207663	6.18e-05	0.00174404	Down	Yes
translation initiation factor IF-2 subunit beta] [protein_id=AKB56476.1	Phosphoenolpyruvate carboxylase, archaeal	AKB54119.1	71.8727	-0.694214	0.177001	7.52e-06	0.00031308	Down	Yes
	Cation efflux system protein	AKB56321.1	45.0768	-0.696805	0.2283	0.00017809	0.00406434	Down	Yes
2-isopropylmalate synthase] [protein_id=AKB56184.1	Chitin binding protein	AKB53315.1	465.103	-0.696844	0.144535	1.43e-07	1.01e-05	Down	Yes
	hypothetical protein	AKB55904.1	298.233	-0.700383	0.230308	0.0001834	0.00412896	Down	Yes
hypothetical protein] [protein_id=AKB53611.1	CobN component of cobalt chelatase involved in B12 biosynthesis	AKB53653.1	145.167	-0.706224	0.137973	3.05e-08	2.9e-06	Down	Yes
	Sodium/glycine symporter GlyP	AKB53940.1	17.4705	-0.719221	0.307815	0.00132125	0.0199203	Down	Yes
	Acylphosphatase	AKB54872.1	33.7459	-0.723693	0.310469	0.0010183	0.0160046	Down	Yes
Methyltransferase] [protein_id=AKB54089.1	hypothetical protein	AKB54087.1	44.0586	-0.728148	0.209004	4.06e-05	0.00126371	Down	Yes
	ATP-dependent 26S proteasome regulatory subunit	AKB55473.1	11.5017	-0.729589	0.45027	0.00461913	0.0488602	Down	Yes
	Methyltransferase	AKB54089.1	57.8332	-0.733943	0.237484	0.00014228	0.00333855	Down	Yes
O-methyltransferase] [protein_id=AKB54484.1	Oligopeptide ABC transporter, periplasmic oligopeptide-binding protein OppA	AKB55467.1	67.0742	-0.744362	0.2224	5.28e-05	0.00154259	Down	Yes
Vitamin B12 ABC transporter, B12-binding component BtuF] [protein_id=AKB54996.1	Dipeptide-binding ABC transporter, periplasmic substrate-binding component	AKB53218.1	214.682	-0.744876	0.203443	2.03e-05	0.00070403	Down	Yes
	ABC transporter, permease protein	AKB54065.1	59.5957	-0.752748	0.274624	0.00040132	0.00786583	Down	Yes
Formylmethanofuran dehydrogenase (molybdenum) subunit D] [protein_id=AKB53391.1	hypothetical protein	AKB53041.1	376.159	-0.755922	0.149444	3.39e-08	3.14e-06	Down	Yes	methanogenesis
hypothetical protein] [protein_id=AKB53657.1	PQQ enzyme repeat domain protein	AKB53654.1	52.1572	-0.756138	0.204558	1.73e-05	0.00064134	Down	Yes
Dissimilatory sulfite reductase (desulfoviridin), alpha and beta subunits] [protein_id=AKB53911.1	Dipeptide transport ATP-binding protein DppD	AKB53221.1	53.3056	-0.75698	0.222587	5.1e-05	0.00150375	Down	Yes
Dimethylamine permease] [protein_id=AKB53956.1	translation initiation factor IF-2 subunit beta	AKB56476.1	243.455	-0.76168	0.129778	3.99e-10	5.55e-08	Down	Yes	methanogenesis
ChlI component of cobalt chelatase involved in B12 biosynthesis] [protein_id=AKB53658.1	O-methyltransferase	AKB54484.1	47.2966	-0.765349	0.210708	2.01e-05	0.00070403	Down	Yes
Mobile element protein] [protein_id=AKB54501.1	phosphatidylethanolamine N-methyltransferase	AKB54438.1	250.968	-0.769837	0.16964	4.27e-07	2.74e-05	Down	Yes
Phosphoenolpyruvate carboxylase, archaeal] [protein_id=AKB54119.1	hypothetical protein	AKB55214.1	209.098	-0.770377	0.195885	6.39e-06	0.00027566	Down	Yes
Cation-transporting ATPase, E1-E2 family] [protein_id=AKB54977.1	Energy-conserving hydrogenase (ferredoxin), subunit F	AKB55809.1	79.1463	-0.774129	0.196537	5.97e-06	0.00026169	Down	Yes
hypothetical protein] [protein_id=AKB55466.1	Oligopeptide ABC transporter, periplasmic oligopeptide-binding protein OppA	AKB55846.1	130.759	-0.78008	0.196478	5.43e-06	0.00024429	Down	Yes
Nitrogenase (molybdenum-iron) beta chain] [protein_id=AKB55788.1	ChlI component of cobalt chelatase involved in B12 biosynthesis	AKB53658.1	282.487	-0.789841	0.128252	6.2e-11	1.03e-08	Down	Yes
hypothetical protein] [protein_id=AKB55224.1	Iron(III) dicitrate-binding protein	AKB53820.1	207.572	-0.79186	0.24282	7.9e-05	0.00207196	Down	Yes
Nickel insertion protein] [protein_id=AKB54033.1	Iron(III) dicitrate-binding protein	AKB53821.1	199.431	-0.799039	0.239516	6.03e-05	0.00171821	Down	Yes
Glycine betaine ABC transport system, ATP-binding protein OpuAA] [protein_id=AKB54223.1	Oligopeptide transport system permease protein OppB	AKB53684.1	84.8036	-0.833417	0.175989	1.33e-07	9.65e-06	Down	Yes
	hypothetical protein	AKB53514.1	19.9687	-0.834524	0.407238	0.00121908	0.0188054	Down	Yes
CobN component of cobalt chelatase involved in B12 biosynthesis] [protein_id=AKB53653.1	hypothetical protein	AKB55092.1	44.2342	-0.839567	0.221015	9.07e-06	0.0003687	Down	Yes
Ribosomal-protein-S18p-alanine acetyltransferase] [protein_id=AKB53042.1	PQQ enzyme repeat domain protein	AKB53655.1	81.2299	-0.847138	0.213515	5.09e-06	0.0002386	Down	Yes
hypothetical protein] [protein_id=AKB55621.1	Rhodanese-like domain protein	AKB53833.1	62.6043	-0.859339	0.21651	4.77e-06	0.00022723	Down	Yes
2-phospho-L-lactate transferase] [protein_id=AKB53531.1	5'-methylthioadenosine phosphorylase	AKB54845.1	79.6333	-0.859637	0.224987	8.82e-06	0.00036264	Down	Yes
cell surface protein] [protein_id=AKB54061.1	Amino acid permease	AKB53978.1	28.3805	-0.877846	0.249018	2.77e-05	0.00091261	Down	Yes
Monomethylamine methyltransferase corrinoid protein] [protein_id=AKB54849.1	Lead, cadmium, zinc and mercury transporting ATPase	AKB53574.1	107.148	-0.899724	0.188369	9.29e-08	7.37e-06	Down	Yes	methanogenesis (from methylamine)
Mobile element protein] [protein_id=AKB56446.1	Dissimilatory sulfite reductase (desulfoviridin), alpha and beta subunits	AKB53911.1	640.658	-0.910302	0.204816	6.19e-07	3.89e-05	Down	Yes
Formylmethanofuran dehydrogenase (molybdenum) subunit D] [protein_id=AKB53640.1	hypothetical protein	AKB56080.1	100.98	-0.930202	0.185305	3.54e-08	3.19e-06	Down	Yes	methanogenesis
Ferredoxin] [protein_id=AKB53283.1	Molybdenum transport system permease protein ModB	AKB55167.1	73.3994	-0.932006	0.194473	1.23e-07	9.07e-06	Down	Yes
hypothetical protein] [protein_id=AKB54989.1	Ribosomal-protein-S18p-alanine acetyltransferase	AKB53042.1	148.089	-0.945678	0.159301	2.37e-10	3.6e-08	Down	Yes
FmdE, Molybdenum formylmethanofuran dehydrogenase operon] [protein_id=AKB53387.1	hypothetical protein	AKB55446.1	221.003	-0.974267	0.215954	3.07e-07	2e-05	Down	Yes
Monomethylamine:corrinoid methyltransferase] [transl_except=(pos:604..606,aa:Pyl)] [protein_id=AKB53148.1	hypothetical protein	AKB55466.1	87.158	-0.982213	0.190669	1.73e-08	1.83e-06	Down	Yes
	hypothetical protein	AKB54679.1	12.5064	-1.02817	0.439061	0.00081799	0.0135843	Down	Yes
ABC transporter, solute-binding protein] [protein_id=AKB56082.1	methyltransferase, UbiE/COQ5 family	AKB56081.1	47.2207	-1.036	0.306128	3.71e-05	0.0011667	Down	Yes
V-type ATP synthase subunit B] [protein_id=AKB53587.1	Vitamin B12 ABC transporter, permease component BtuC	AKB56079.1	35.6773	-1.05094	0.25757	2.36e-06	0.00011772	Down	Yes
Ammonium transporter] [protein_id=AKB55798.1	ABC transporter, solute-binding protein	AKB56082.1	109.131	-1.05683	0.199243	8.5e-09	1.01e-06	Down	Yes
Methanol:corrinoid methyltransferase] [protein_id=AKB55351.1	hypothetical protein	AKB54341.1	24.4389	-1.08565	0.308979	2.72e-05	0.00090602	Down	Yes
	hypothetical protein	AKB54884.1	73.0119	-1.10422	0.366798	0.0001333	0.00317243	Down	Yes
iron-sulfur flavoprotein] [protein_id=AKB53501.1	hypothetical protein	AKB54925.1	29.3215	-1.1265	0.291845	6.45e-06	0.00027566	Down	Yes	methanogenesis (acetate)
	hypothetical protein	AKB56418.1	37.9836	-1.15105	0.628132	0.00186716	0.0251878	Down	Yes
	hypothetical protein	AKB53512.1	38.2708	-1.30828	0.546058	0.0003048	0.00626906	Down	Yes
MoxR-related protein] [protein_id=AKB53337.1	Phycocyanin alpha phycocyanobilin lyase	AKB55518.1	37.9449	-1.36818	0.286718	1.1e-07	8.5e-06	Down	Yes
Nitrogen regulatory protein P-II] [protein_id=AKB55785.1	Fmn-binding protein	AKB54032.1	500.387	-1.36957	0.212937	3.59e-12	8.54e-10	Down	Yes	nitrogen fixation
hypothetical protein] [protein_id=AKB55107.1	Methanol:corrinoid methyltransferase	AKB56319.1	6552.37	-1.4049	0.336729	1.11e-06	6.27e-05	Down	Yes
Monomethylamine methyltransferase corrinoid protein] [protein_id=AKB53149.1	dTDP-4-dehydrorhamnose 3,5-epimerase	AKB54031.1	289.079	-1.40572	0.284653	2.25e-08	2.2e-06	Down	Yes	methanogenesis (from methylamine)
Choline permease LicB] [protein_id=AKB53457.1	Nickel insertion protein	AKB54033.1	2463.88	-1.44798	0.286901	1.33e-08	1.53e-06	Down	Yes
7,8 dihydropteroate synthase (methanopterin)] [protein_id=AKB55376.1	hypothetical protein	AKB55519.1	44.3969	-1.45464	0.320502	3.05e-07	2e-05	Down	Yes
	putative transporter PduT for various metalloporphyrins	AKB53513.1	28.9026	-1.45812	0.760286	0.00037257	0.00738923	Down	Yes
Ammonium transporter] [protein_id=AKB53576.1	Methanol methyltransferase corrinoid protein	AKB56318.1	3082.91	-1.46287	0.248894	2.02e-10	3.21e-08	Down	Yes
Nitrogen regulatory protein P-II] [protein_id=AKB55797.1	Methanol methyltransferase corrinoid protein	AKB53301.1	424.284	-1.59032	0.31303	1.8e-08	1.83e-06	Down	Yes	Nitrogen fixation
Thiamin biosynthesis protein ThiC] [protein_id=AKB56158.1	hypothetical protein	AKB55520.1	15.7708	-1.79489	0.457714	2.31e-06	0.00011772	Down	Yes
Restriction endonuclease] [protein_id=AKB55505.1	Transcriptional regulator, MerR family	AKB54924.1	474.136	-1.86742	0.288549	6.85e-12	1.52e-09	Down	Yes
hypothetical protein] [protein_id=AKB53194.1	Serine acetyltransferase	AKB54248.1	133.853	-1.95345	0.315963	2.13e-11	4.44e-09	Down	Yes
hypothetical protein] [protein_id=AKB53936.1	O-acetylhomoserine sulfhydrylase	AKB54255.1	528.627	-1.98519	0.19875	1.36e-24	1.51e-21	Down	Yes
Monomethylamine permease] [protein_id=AKB53145.1	Cysteine synthase	AKB54249.1	378.58	-2.04707	0.208955	8.79e-24	5.86e-21	Down	Yes	methanogenesis
Chemotaxis protein methyltransferase CheR] [protein_id=AKB56509.1	Homoserine O-acetyltransferase	AKB54256.1	217.019	-2.11764	0.214607	1.9e-24	1.58e-21	Down	Yes
Dimethylamine permease] [protein_id=AKB53923.1	Quinolinate synthetase	AKB54254.1	83.5311	-2.41669	0.33852	8.32e-14	2.31e-11	Down	Yes	methanogenesis
Nitrogenase (molybdenum-iron) reductase and maturation protein NifH] [protein_id=AKB55784.1	Cysteine desulfurase	AKB54252.1	543.263	-2.45907	0.260037	2.75e-22	1.53e-19	Down	Yes	nitrogen fixation
Heat shock protein GrpE] [protein_id=AKB55582.1	scaffold protein	AKB54253.1	239.045	-2.49905	0.225138	5.53e-30	1.84e-26	Down	Yes

## Sheet: 0˚C Mg.perchlorate (Table S7)
	Table S7. Significantly differentially expressed genes of M. barkeri grown at 0˚C supplemented with Mg(ClO4)2 (Wald test, P < 0.05). Differential expression is relative to the 0˚C perchlorate-free control.
	Abbreviations: ProteinID, GenBank protein accession number; baseMean, normalized transcript counts of all replicates normalized for sequencing depth;
	log2FoldChange, log2-fold change in expression of group relative to 0˚C perchlorate-free control; lfcSE, standard error of log2-fold change;
	padj, p-value adjusted for multiple testing using Benjamini-Hochberg correction.
	0˚C Mg.perchlorate vs. 0˚C Control
	Protein	Protein ID	baseMean	log2FoldChange	lfcSE	pvalue	padj	regulation
Transcriptional regulator, MarR family] [protein_id=AKB53962.1	Transcriptional regulator, MarR family	AKB53962.1	34.5471	3.15204	0.742609	9.19927e-07	0.000201267	Up
CoB--CoM heterodisulfide reductase subunit A] [protein_id=AKB53711.1	CoB--CoM heterodisulfide reductase subunit A	AKB53711.1	429.256	2.65935	0.708338	6.70633e-06	0.00102707	Up
hypothetical protein] [protein_id=AKB53131.1	hypothetical protein	AKB53131.1	29.4337	2.59313	0.752545	2.10753e-05	0.00230548	Up
Putative membrane protein] [protein_id=AKB53266.1	Putative membrane protein	AKB53266.1	14.236	2.53017	0.979885	0.000283626	0.0142383	Up
hypothetical protein] [protein_id=AKB56054.1	hypothetical protein	AKB56054.1	238.515	2.08749	1.03956	0.00114214	0.04153	Up
Cysteate synthase] [protein_id=AKB55299.1	Cysteate synthase	AKB55299.1	325.055	1.96766	0.410155	8.25084e-08	3.61033e-05	Up
hypothetical protein] [protein_id=AKB53734.1	hypothetical protein	AKB53734.1	96.9376	1.92173	0.425497	3.49515e-07	0.000107056	Up
hypothetical protein] [protein_id=AKB55136.1	hypothetical protein	AKB55136.1	22.2245	1.87753	0.898645	0.0011479	0.04153	Up
transcriptional regulator] [protein_id=AKB56273.1	transcriptional regulator	AKB56273.1	17.6242	1.85539	0.805698	0.000708701	0.0285625	Up
hypothetical protein] [protein_id=AKB55734.1	hypothetical protein	AKB55734.1	34.8253	1.77706	0.625444	0.000169234	0.00959933	Up
membrane protein, putative] [protein_id=AKB55358.1	membrane protein, putative	AKB55358.1	43.389	1.74981	0.647849	0.000231052	0.0122019	Up
hypothetical protein] [protein_id=AKB53077.1	hypothetical protein	AKB53077.1	273.919	1.71018	0.332692	1.35089e-08	1.37926e-05	Up
Chitin binding protein] [protein_id=AKB53537.1	Chitin binding protein	AKB53537.1	881.546	1.63006	0.245146	1.72007e-12	5.26856e-09	Up
hypothetical protein] [protein_id=AKB53053.1	hypothetical protein	AKB53053.1	40.3353	1.62907	0.821161	0.00126613	0.0434326	Up
CoB--CoM heterodisulfide reductase subunit B] [protein_id=AKB53709.1	CoB--CoM heterodisulfide reductase subunit B	AKB53709.1	80.3132	1.52386	0.543725	0.000221799	0.0121316	Up
Sulfopyruvate decarboxylase - alpha subunit] [protein_id=AKB55298.1	Sulfopyruvate decarboxylase - alpha subunit	AKB55298.1	253.22	1.43025	0.292495	5.65789e-08	3.61033e-05	Up
Peptidase M48, Ste24p precursor] [protein_id=AKB53103.1	Peptidase M48, Ste24p precursor	AKB53103.1	528.76	1.36375	0.378532	1.78009e-05	0.00201942	Up
photosystem I assembly protein Ycf3] [protein_id=AKB53980.1	photosystem I assembly protein Ycf3	AKB53980.1	99.4733	1.30092	0.605456	0.00115321	0.04153	Up
Ferrous iron transport protein B] [protein_id=AKB53199.1	Ferrous iron transport protein B	AKB53199.1	540.586	1.2774	0.315627	2.64298e-06	0.000449748	Up
Molybdenum ABC transporter, periplasmic molybdenum-binding protein ModA] [protein_id=AKB53243.1	Molybdenum ABC transporter, periplasmic molybdenum-binding protein ModA	AKB53243.1	111.583	1.1971	0.398259	0.00012326	0.00777601	Up
transcriptional regulator] [protein_id=AKB56143.1	transcriptional regulator	AKB56143.1	140.502	1.18568	0.391479	0.000122031	0.00777601	Up
Phenylacetate-coenzyme A ligase] [protein_id=AKB54702.1	Phenylacetate-coenzyme A ligase	AKB54702.1	192.868	1.10523	0.364652	0.000126425	0.00777601	Up
Formylmethanofuran dehydrogenase subunit C] [protein_id=AKB53647.1	Formylmethanofuran dehydrogenase subunit C	AKB53647.1	249.633	1.0456	0.323148	7.058e-05	0.00527284	Up
Formylmethanofuran dehydrogenase subunit B] [protein_id=AKB53645.1	Formylmethanofuran dehydrogenase subunit B	AKB53645.1	691.183	1.03766	0.241107	1.15728e-06	0.000236317	Up
Archaeal heat shock regulator, ArsR family] [protein_id=AKB53083.1	Archaeal heat shock regulator, ArsR family	AKB53083.1	562.52	0.955027	0.317649	0.000157979	0.00913	Up
transporter, RND superfamily] [protein_id=AKB53364.1	transporter, RND superfamily	AKB53364.1	455.292	0.912558	0.239101	8.5798e-06	0.00121017	Up
Nitrogenase (molybdenum-iron) reductase and maturation protein NifH] [protein_id=AKB55784.1	Nitrogenase (molybdenum-iron) reductase and maturation protein NifH	AKB55784.1	525.193	0.862645	0.304276	0.000296633	0.014422	Up
hypothetical protein] [protein_id=AKB54610.1	hypothetical protein	AKB54610.1	134.702	0.82377	0.361299	0.00131985	0.0439423	Up
Rubrerythrin] [protein_id=AKB55861.1	Rubrerythrin	AKB55861.1	246.393	0.819562	0.357168	0.00128561	0.0434326	Up
UDP-glucose 4-epimerase] [protein_id=AKB56409.1	UDP-glucose 4-epimerase	AKB56409.1	120.621	0.816839	0.307572	0.000487028	0.0216198	Up
KEOPS complex Cgi121-like subunit] [protein_id=AKB55542.1	KEOPS complex Cgi121-like subunit	AKB55542.1	105.667	0.813271	0.347281	0.00116604	0.04153	Up
cell surface protein] [protein_id=AKB53755.1	cell surface protein	AKB53755.1	7150.73	0.795049	0.170292	2.64007e-07	8.98503e-05	Up
Formylmethanofuran dehydrogenase subunit A] [protein_id=AKB53646.1	Formylmethanofuran dehydrogenase subunit A	AKB53646.1	792.828	0.78545	0.230461	5.03655e-05	0.0044077	Up
Heat shock protein 60 family chaperone GroEL] [protein_id=AKB56443.1	Succinate-semialdehyde dehydrogenase [NAD]	AKB56443.1	2026.49	0.777747	0.310218	0.00082511	0.0325922	Up
duf556 family protein] [protein_id=AKB56354.1	duf556 family protein	AKB56354.1	463.202	0.739215	0.258176	0.0003328	0.0155673	Up
Tryptophan synthase beta chain] [protein_id=AKB54952.1	Tryptophan synthase beta chain	AKB54952.1	259.447	0.738339	0.324278	0.00154493	0.0487849	Up
Coenzyme B synthesis from 2-oxoglutarate: steps 4, 7, 8, 11, and 12 (large subunit)] [protein_id=AKB53702.1	Coenzyme B synthesis from 2-oxoglutarate: steps 4, 7, 8, 11, and 12 (large subunit)	AKB53702.1	121.225	0.719336	0.304786	0.00128329	0.0434326	Up
2-amino-3,7-dideoxy-D-threo-hept-6-ulosonate synthase] [protein_id=AKB53289.1	2-amino-3,7-dideoxy-D-threo-hept-6-ulosonate synthase	AKB53289.1	288.289	0.71424	0.301098	0.00136277	0.0448834	Up
hypothetical protein] [protein_id=AKB55489.1	hypothetical protein	AKB55489.1	28719.9	0.713052	0.241355	0.000264409	0.0134981	Up
DUF124 domain-containing protein] [protein_id=AKB53030.1	DUF124 domain-containing protein	AKB53030.1	235.597	0.68854	0.250428	0.000507433	0.0222038	Up
hypothetical protein] [protein_id=AKB54740.1	hypothetical protein	AKB54740.1	471.52	0.678552	0.251725	0.000603283	0.0253131	Up
IMP cyclohydrolase] [protein_id=AKB56133.1	IMP cyclohydrolase	AKB56133.1	729.775	0.654597	0.167309	1.02612e-05	0.00136653	Up
cell surface protein] [protein_id=AKB54784.1	cell surface protein	AKB54784.1	710.152	0.620895	0.260169	0.00156232	0.0488306	Up
Trimethylamine:corrinoid methyltransferase] [transl_except=(pos:1000..1002,aa:Pyl)] [protein_id=AKB53459.1	Trimethylamine:corrinoid methyltransferase	AKB53459.1	365.92	0.563718	0.203001	0.000652275	0.0266389	Up
Chitin binding protein] [protein_id=AKB55111.1	Chitin binding protein	AKB55111.1	674.017	0.535586	0.211901	0.00145727	0.0469855	Up
universal archaeal KH-domain/beta-lactamase-domain protein] [protein_id=AKB55765.1	universal archaeal KH-domain/beta-lactamase-domain protein	AKB55765.1	1277.1	-0.44142	0.14813	0.000552711	0.0236335	Down
Polyphosphate kinase] [protein_id=AKB56455.1	Polyphosphate kinase	AKB56455.1	1141.18	-0.467616	0.179347	0.00141356	0.0460609	Down
Translation initiation factor 2] [protein_id=AKB54135.1	Translation initiation factor 2	AKB54135.1	1605.79	-0.510272	0.16741	0.000348164	0.0159168	Down
LSU ribosomal protein L9e (L6p)] [protein_id=AKB55595.1	LSU ribosomal protein L9e (L6p)	AKB55595.1	1528.1	-0.563421	0.198648	0.000555538	0.0236335	Down
CO dehydrogenase accessory protein CooC (nickel insertion)] [protein_id=AKB53623.1	CO dehydrogenase accessory protein CooC (nickel insertion)	AKB53623.1	1009.14	-0.568273	0.211353	0.000840609	0.0325922	Down
CO dehydrogenase accessory protein CooC (nickel insertion)] [protein_id=AKB55756.1	CO dehydrogenase accessory protein CooC (nickel insertion)	AKB55756.1	1009.14	-0.568273	0.211353	0.000840609	0.0325922	Down
SSU ribosomal protein S13e (S15p)] [protein_id=AKB53826.1	SSU ribosomal protein S13e (S15p)	AKB53826.1	768.645	-0.626209	0.197894	0.000150091	0.00884096	Down
Formylmethanofuran dehydrogenase (molybdenum) subunit B] [protein_id=AKB53641.1	Formylmethanofuran dehydrogenase (molybdenum) subunit B	AKB53641.1	1644.34	-0.648676	0.223021	0.000355421	0.0160096	Down
Putative transcription antitermination protein NusG] [protein_id=AKB56176.1	Putative transcription antitermination protein NusG	AKB56176.1	787.424	-0.660215	0.271498	0.00129036	0.0434326	Down
CO dehydrogenase/acetyl-CoA synthase subunit delta, corrinoid iron-sulfur subcomplex small subunit] [protein_id=AKB53622.1	CO dehydrogenase/acetyl-CoA synthase subunit delta, corrinoid iron-sulfur subcomplex small subunit	AKB53622.1	2380.46	-0.664282	0.20513	0.000119376	0.00777601	Down
Pyrrolysyl-tRNA synthetase] [protein_id=AKB53153.1	Pyrrolysyl-tRNA synthetase	AKB53153.1	1614.68	-0.66492	0.193274	6.11753e-05	0.00493105	Down
CO dehydrogenase/acetyl-CoA synthase subunit delta, corrinoid iron-sulfur subcomplex small subunit] [protein_id=AKB55757.1	CO dehydrogenase/acetyl-CoA synthase subunit delta, corrinoid iron-sulfur subcomplex small subunit	AKB55757.1	2433.21	-0.667397	0.196773	6.98788e-05	0.00527284	Down
CO dehydrogenase/acetyl-CoA synthase subunit alpha, CO dehydrogenase subcomplex] [protein_id=AKB55753.1	CO dehydrogenase/acetyl-CoA synthase subunit alpha, CO dehydrogenase subcomplex	AKB55753.1	1460.73	-0.677675	0.223699	0.000229341	0.0122019	Down
NADH-plastoquinone oxidoreductase subunit] [protein_id=AKB53152.1	NADH-plastoquinone oxidoreductase subunit	AKB53152.1	558.546	-0.687047	0.19567	4.3912e-05	0.00407583	Down
DNA-directed RNA polymerase subunit N] [protein_id=AKB53477.1	DNA-directed RNA polymerase subunit N	AKB53477.1	689.663	-0.697506	0.275403	0.000909711	0.0348305	Down
CO dehydrogenase/acetyl-CoA synthase subunit epsilon, CO dehydrogenase subcomplex] [protein_id=AKB53625.1	CO dehydrogenase/acetyl-CoA synthase subunit epsilon, CO dehydrogenase subcomplex	AKB53625.1	804.775	-0.707497	0.215963	9.63145e-05	0.00686073	Down
ATP-utilizing enzymes of the PP-loop superfamily protein] [protein_id=AKB56021.1	ATP-utilizing enzymes of the PP-loop superfamily protein	AKB56021.1	1650.33	-0.753739	0.193492	8.69208e-06	0.00121017	Down
Dimethylamine methyltransferase corrinoid protein] [protein_id=AKB53954.1	Dimethylamine methyltransferase corrinoid protein	AKB53954.1	1759.35	-0.769377	0.243811	0.000126935	0.00777601	Down
CO dehydrogenase/acetyl-CoA synthase subunit alpha, CO dehydrogenase subcomplex] [protein_id=AKB53626.1	CO dehydrogenase/acetyl-CoA synthase subunit alpha, CO dehydrogenase subcomplex	AKB53626.1	5263.44	-0.773801	0.22808	5.65784e-05	0.00481388	Down
hypothetical protein] [protein_id=AKB53507.1	hypothetical protein	AKB53507.1	253.488	-0.783788	0.239953	8.22045e-05	0.00599506	Down
hypothetical protein] [protein_id=AKB53480.1	hypothetical protein	AKB53480.1	715.258	-0.797446	0.222029	2.62559e-05	0.00277317	Down
hypothetical protein] [protein_id=AKB54856.1	hypothetical protein	AKB54856.1	178.958	-0.808038	0.283476	0.000303404	0.0145207	Down
5-tetrahydromethanopterin:corrinoid iron-sulfur protein methyltransferase] [protein_id=AKB55758.1	5-tetrahydromethanopterin:corrinoid iron-sulfur protein methyltransferase	AKB55758.1	2226.29	-0.820027	0.194932	2.15382e-06	0.000412321	Down
5-tetrahydromethanopterin:corrinoid iron-sulfur protein methyltransferase] [protein_id=AKB53621.1	5-tetrahydromethanopterin:corrinoid iron-sulfur protein methyltransferase	AKB53621.1	2824.18	-0.820219	0.216411	1.17136e-05	0.00149495	Down
Dimethylamine methyltransferase corrinoid protein] [protein_id=AKB53925.1	Dimethylamine methyltransferase corrinoid protein	AKB53925.1	1201.93	-0.839284	0.283452	0.000212454	0.0118318	Down
hypothetical protein] [protein_id=AKB54402.1	hypothetical protein	AKB54402.1	387.808	-0.875236	0.380675	0.00153804	0.0487849	Down
Glycine betaine ABC transport system, ATP-binding protein OpuAA] [protein_id=AKB54223.1	Glycine betaine ABC transport system, ATP-binding protein OpuAA	AKB54223.1	399.745	-0.935047	0.304997	0.000133514	0.0080187	Down
Monomethylamine permease] [protein_id=AKB53147.1	Monomethylamine permease	AKB53147.1	316.109	-0.944966	0.335204	0.000288206	0.0142383	Down
Glycine betaine ABC transport system, permease protein OpuAB] [protein_id=AKB54224.1	Glycine betaine ABC transport system, permease protein OpuAB	AKB54224.1	74.2372	-1.03269	0.377562	0.000335436	0.0155673	Down
Methylcobalamin:coenzyme M methyltransferase, methanol-specific] [protein_id=AKB54540.1	Methylcobalamin:coenzyme M methyltransferase, methanol-specific	AKB54540.1	324.916	-1.0329	0.414605	0.000642594	0.0265982	Down
Methylcobalamin:coenzyme M methyltransferase, methanol-specific] [protein_id=AKB55352.1	Methylcobalamin:coenzyme M methyltransferase, methanol-specific	AKB55352.1	383.157	-1.03856	0.251929	2.45675e-06	0.000442649	Down
Methanol:corrinoid methyltransferase] [protein_id=AKB56319.1	Methanol:corrinoid methyltransferase	AKB56319.1	10009.3	-1.04343	0.451491	0.000956906	0.0361852	Down
Thymidylate synthase] [protein_id=AKB55418.1	Thymidylate synthase	AKB55418.1	89.459	-1.05815	0.482765	0.0012454	0.0434326	Down
Methanol:corrinoid methyltransferase] [protein_id=AKB53300.1	Methanol:corrinoid methyltransferase	AKB53300.1	692.697	-1.05869	0.373268	0.000242352	0.0125817	Down
hypothetical protein] [protein_id=AKB53910.1	hypothetical protein	AKB53910.1	189.495	-1.07685	0.348162	0.000102058	0.00710459	Down
CobN-like chelatase BtuS for metalloporphyrine salvage] [protein_id=AKB53516.1	CobN-like chelatase BtuS for metalloporphyrine salvage	AKB53516.1	176.926	-1.14432	0.313985	1.54147e-05	0.00181597	Down
Methanol:corrinoid methyltransferase] [protein_id=AKB55351.1	Methanol:corrinoid methyltransferase	AKB55351.1	3010.08	-1.15328	0.354332	6.01967e-05	0.00493105	Down
Methylthiol:coenzyme M methyltransferase corrinoid protein] [protein_id=AKB54541.1	Methylthiol:coenzyme M methyltransferase corrinoid protein	AKB54541.1	80.9412	-1.1743	0.523072	0.00106759	0.0398783	Down
hypothetical protein] [protein_id=AKB54259.1	hypothetical protein	AKB54259.1	417.267	-1.18209	0.35301	4.27503e-05	0.00407583	Down
Fmn-binding protein] [protein_id=AKB54032.1	Fmn-binding protein	AKB54032.1	815.135	-1.18444	0.298635	4.16303e-06	0.000671124	Down
dTDP-4-dehydrorhamnose 3,5-epimerase] [protein_id=AKB54031.1	dTDP-4-dehydrorhamnose 3,5-epimerase	AKB54031.1	433.815	-1.26643	0.348397	1.45646e-05	0.00178446	Down
hypothetical protein] [protein_id=AKB55080.1	hypothetical protein	AKB55080.1	86.149	-1.27774	0.398554	6.73649e-05	0.00527284	Down
Nickel insertion protein] [protein_id=AKB54033.1	Nickel insertion protein	AKB54033.1	3843.36	-1.38317	0.313846	5.67677e-07	0.000158072	Down
hypothetical protein] [protein_id=AKB55956.1	hypothetical protein	AKB55956.1	77.7178	-1.41237	0.472515	0.000122621	0.00777601	Down
Dimethylamine:corrinoid methyltransferase] [transl_except=(pos:1066..1068,aa:Pyl)] [protein_id=AKB53455.1	Dimethylamine:corrinoid methyltransferase	AKB53455.1	5806.9	-1.43339	0.301229	1.05623e-07	4.04404e-05	Down
Dimethylamine:corrinoid methyltransferase] [transl_except=(pos:1066..1068,aa:Pyl)] [protein_id=AKB53955.1	Dimethylamine:corrinoid methyltransferase	AKB53955.1	7881.34	-1.48859	0.309397	7.99076e-08	3.61033e-05	Down
Dimethylamine:corrinoid methyltransferase] [transl_except=(pos:1066..1068,aa:Pyl)] [protein_id=AKB53924.1	Dimethylamine:corrinoid methyltransferase	AKB53924.1	6682.64	-1.53249	0.319063	8.20412e-08	3.61033e-05	Down
Ferredoxin] [protein_id=AKB55420.1	Ferredoxin	AKB55420.1	146.484	-1.56256	0.465802	3.66408e-05	0.00362035	Down
Methylthiol:coenzyme M methyltransferase corrinoid protein] [protein_id=AKB54539.1	Methylthiol:coenzyme M methyltransferase corrinoid protein	AKB54539.1	184.384	-1.61703	0.373168	7.95827e-07	0.000187509	Down
Dimethylamine permease] [protein_id=AKB53956.1	Dimethylamine permease	AKB53956.1	1485.8	-1.91817	0.443745	7.13715e-07	0.000182176	Down
hypothetical protein] [protein_id=AKB53514.1	hypothetical protein	AKB53514.1	33.1868	-2.00466	0.583572	2.82574e-05	0.00288508	Down
hypothetical protein] [protein_id=AKB53512.1	hypothetical protein	AKB53512.1	53.6481	-2.28893	0.702232	4.6346e-05	0.00417523	Down
putative transporter PduT for various metalloporphyrins] [protein_id=AKB53513.1	putative transporter PduT for various metalloporphyrins	AKB53513.1	41.9808	-3.85932	0.618031	2.79232e-11	4.27644e-08	Down

## Sheet: 30˚C Na.perchlorate (Table S8)
	Table S8. Significantly differentially expressed genes of M. barkeri supplemented with Na(ClO4) (Wald test, P < 0.05). Differential expression is relative to the 30˚C perchlorate-free control.
	Abbreviations: ProteinID, GenBank protein accession number; baseMean, normalized transcript counts of all replicates normalized for sequencing depth;
	log2FoldChange, log2-fold change in expression of group relative to 30˚C perchlorate-free control; lfcSE, standard error of log2-fold change;
	padj, p-value adjusted for multiple testing using Benjamini-Hochberg correction.
Mg.perchlorate vs. Control	30˚C Na.perchlorate vs. 30˚C Control
RowName	Protein	Protein ID	baseMean	log2FoldChange	lfcSE	pvalue	padj	regulation	Function {inferred from HHpred if hypothetical}	Metabolism
2-isopropylmalate synthase] [protein_id=AKB56184.1	Mobile element protein	AKB54657.1	10.91	1.78184	0.591254	5.98e-05	0.00169505	Up	Yes
Mannose-6-phosphate isomerase] [protein_id=AKB53200.1	Nitrogenase (molybdenum-iron) reductase and maturation protein NifH	AKB55784.1	317.067	1.76072	0.190162	1.42e-21	6.23e-19	Up	Yes
Pentapeptide repeat family protein] [protein_id=AKB54633.1	Nitrogenase FeMo-cofactor scaffold and assembly protein NifE	AKB55789.1	134.127	1.65165	0.175118	3.3e-22	1.69e-19	Up	Yes
Uncharacterized protein ygiD] [protein_id=AKB55329.1	Nitrogenase (molybdenum-iron) alpha chain	AKB55787.1	238.497	1.59107	0.187221	1.1e-18	3.74e-16	Up	Yes
ABC transporter, ATP-binding protein] [protein_id=AKB56303.1	Nitrogen regulatory protein P-II	AKB55785.1	73.3108	1.5842	0.252135	1.64e-11	2.8e-09	Up	Yes
Nitrogen regulatory protein P-II] [protein_id=AKB55797.1	hypothetical protein	AKB56317.1	40.7064	1.52683	0.350413	5.92e-07	4.22e-05	Up	Yes
Nitrogen regulatory protein P-II] [protein_id=AKB55785.1	Nitrogen regulatory protein P-II	AKB55786.1	79.4465	1.5066	0.275163	2.54e-09	2.99e-07	Up	Yes
	hypothetical protein	AKB53130.1	6.46418	1.34311	0.884381	0.00288279	0.0299321	Up	Yes
hypothetical protein] [protein_id=AKB56257.1	Ammonium transporter	AKB55798.1	352.988	1.32584	0.219236	8.04e-11	1.3e-08	Up	Yes
metal-dependent phosphohydrolase] [protein_id=AKB54002.1	Ammonium transporter	AKB53576.1	127.507	1.29336	0.178133	2.6e-14	6.64e-12	Up	Yes
hypothetical protein] [protein_id=AKB55705.1	hypothetical protein	AKB53456.1	21.7895	1.27516	0.325554	3.32e-06	0.0001776	Up	Yes
hypothetical protein] [protein_id=AKB55640.1	Mobile element protein	AKB55274.1	12.08	1.26649	0.418847	9.6e-05	0.00243141	Up	Yes
hypothetical protein] [protein_id=AKB56317.1	Nitrogenase (molybdenum-iron) beta chain	AKB55788.1	202.282	1.26545	0.148459	1.25e-18	3.84e-16	Up	Yes
Methyl coenzyme M reductase alpha subunit] [protein_id=AKB53099.1	hypothetical protein	AKB55854.1	11.4522	1.19516	0.471057	0.00050007	0.00865375	Up	Yes
Mobile element protein] [protein_id=AKB54673.1	Dimethylamine permease	AKB53956.1	909.481	1.17166	0.363518	3.24e-05	0.00110211	Up	Yes
	hypothetical protein	AKB54785.1	16.459	1.17101	1.10378	0.00333766	0.0331924	Up	Yes
Mobile element protein] [protein_id=AKB55274.1	Ammonium transporter	AKB55164.1	201.644	1.16249	0.126364	3.58e-21	1.37e-18	Up	Yes
protein identified by proteomics in Methanosarcina acetivorans (1)] [protein_id=AKB55318.1	Monomethylamine permease	AKB53146.1	31.6809	1.14515	0.232632	4.38e-08	4.18e-06	Up	Yes
beta-ribofuranosylaminobenzene 5'-phosphate synthase] [protein_id=AKB56296.1	Monomethylamine permease	AKB53145.1	15.8619	1.10692	0.396752	0.00021822	0.00460979	Up	Yes
Ferredoxin] [protein_id=AKB53283.1	Phosphinothricin N-acetyltransferase	AKB53633.1	16.6044	1.09732	0.340959	7.52e-05	0.00207123	Up	Yes
Nitrogenase (molybdenum-iron) alpha chain] [protein_id=AKB55787.1	Nitrogenase (molybdenum-iron) reductase and maturation protein NifH	AKB55770.1	164.238	1.08271	0.258711	1.68e-06	0.0001029	Up	Yes
hypothetical protein] [protein_id=AKB54468.1	sensory transduction histidine kinase	AKB55361.1	47.0043	1.07164	0.292023	1.39e-05	0.00054537	Up	Yes
hypothetical protein] [protein_id=AKB53611.1	Nitrogen regulatory protein P-II	AKB55797.1	84.1105	1.07016	0.232765	2.59e-07	2.08e-05	Up	Yes
Mobile element protein] [protein_id=AKB54808.1	Choline permease LicB	AKB53457.1	168.58	1.06337	0.165933	9.93e-12	1.9e-09	Up	Yes
	hypothetical protein	AKB55644.1	7.33157	1.04315	0.544815	0.00220125	0.0254174	Up	Yes
Ribosomal-protein-S18p-alanine acetyltransferase] [protein_id=AKB54753.1	Cytosolic Fe-S cluster assembling factor NBP35	AKB55089.1	69.4669	1.00971	0.200254	3.09e-08	3.15e-06	Up	Yes
	hypothetical protein	AKB56090.1	9.98172	1.00346	0.526031	0.00200832	0.0237509	Up	Yes
hypothetical protein] [protein_id=AKB54840.1	Dimethylamine permease	AKB53923.1	65.1375	0.985209	0.244406	2.84e-06	0.00016422	Up	Yes
Mobile element protein] [protein_id=AKB53831.1	hypothetical protein	AKB54190.1	19934.2	0.959221	0.276011	2.92e-05	0.00100517	Up	Yes
hypothetical protein] [protein_id=AKB53845.1	response regulator receiver	AKB53960.1	120.665	0.938244	0.230431	2.39e-06	0.00014068	Up	Yes
Ammonium transporter] [protein_id=AKB53576.1	Peptidyl-prolyl cis-trans isomerase	AKB53722.1	44.6692	0.918829	0.228474	3.27e-06	0.0001776	Up	Yes
hypothetical protein] [protein_id=AKB54190.1	Spermidine/putrescine-binding protein	AKB55998.1	48.0489	0.914722	0.244137	1.22e-05	0.00049624	Up	Yes
	Mannose-6-phosphate isomerase	AKB53200.1	10.3757	0.909333	0.476738	0.00222253	0.0254966	Up	Yes
Nitrogenase vanadium-cofactor synthesis protein VnfE] [protein_id=AKB54349.1	Carbon-nitrogen hydrolase	AKB53106.1	112.907	0.87861	0.219105	4.53e-06	0.00022758	Up	Yes
hypothetical protein] [protein_id=AKB53456.1	FKBP-type peptidyl-prolyl cis-trans isomerase SlyD	AKB53721.1	73.2092	0.877088	0.176329	5.57e-08	5.01e-06	Up	Yes
	hypothetical protein	AKB53943.1	12.2246	0.830454	0.371909	0.00147813	0.0190232	Up	Yes
cell surface glycoprotein] [protein_id=AKB54068.1	Ribosomal-protein-S18p-alanine acetyltransferase	AKB54751.1	27.3069	0.829784	0.361773	0.00100532	0.0148066	Up	Yes
Heat shock protein 60 family chaperone GroEL] [protein_id=AKB55160.1	bi-functional transferase/deacetylase	AKB55362.1	126.899	0.799733	0.274922	0.00022502	0.00468874	Up	Yes
V-type ATP synthase subunit A] [protein_id=AKB53588.1	Inorganic pyrophosphatase	AKB53990.1	55.4382	0.797028	0.281956	0.00030627	0.0060134	Up	Yes
Inorganic pyrophosphatase] [protein_id=AKB53990.1	Nitrogen regulatory protein P-II	AKB55165.1	74.2899	0.795299	0.182846	1.18e-06	7.72e-05	Up	Yes
hypothetical protein] [protein_id=AKB54230.1	Nitrogenase FeMo-cofactor scaffold and assembly protein NifN	AKB55790.1	62.9157	0.788515	0.229545	4.34e-05	0.00135523	Up	Yes
scaffold protein] [protein_id=AKB54253.1	CrcB protein	AKB56061.1	25.3947	0.769899	0.332425	0.00119184	0.0162973	Up	Yes
response regulator receiver] [protein_id=AKB53960.1	hypothetical protein	AKB53444.1	216.989	0.756652	0.225228	4.85e-05	0.00145842	Up	Yes
hypothetical protein] [protein_id=AKB55950.1	Dimethylamine methyltransferase corrinoid protein	AKB53925.1	675.398	0.749495	0.216204	3.6e-05	0.00119022	Up	Yes
	CRISPR-associated helicase Cas3	AKB55645.1	20.2767	0.749407	0.434632	0.00306939	0.0315488	Up	Yes
Mn-dependent transcriptional regulator] [protein_id=AKB56101.1	Monomethylamine permease	AKB53147.1	197.307	0.741299	0.188158	5.57e-06	0.00027076	Up	Yes
(dimethylallyl)adenosine tRNA methylthiotransferase] [protein_id=AKB55539.1	Twin-arginine translocation protein TatC	AKB54381.1	163.829	0.733879	0.217198	5.59e-05	0.00164613	Up	Yes
Flagella-related protein FlaI] [protein_id=AKB53697.1	(dimethylallyl)adenosine tRNA methylthiotransferase	AKB55539.1	147.299	0.726185	0.150652	1.34e-07	1.14e-05	Up	Yes
hypothetical protein] [protein_id=AKB55960.1	Thioredoxin	AKB54316.1	38.7737	0.718238	0.244752	0.00021216	0.00454432	Up	Yes
cell surface protein] [protein_id=AKB54061.1	Polysaccharide deacetylase	AKB56274.1	19.1671	0.712598	0.270142	0.00068397	0.0106345	Up	Yes
Dimethylamine permease] [protein_id=AKB53923.1	Cytochrome d ubiquinol oxidase subunit II	AKB55625.1	138.209	0.709813	0.183408	8.6e-06	0.00038157	Up	Yes
Coenzyme B synthesis from 2-oxoglutarate: steps 1, 6, and 10] [protein_id=AKB55237.1	Tetracycline resistance protein	AKB53182.1	41.5242	0.706309	0.236355	0.00021564	0.0045869	Up	Yes
transposase] [protein_id=AKB55108.1	hypothetical protein	AKB53701.1	53.7334	0.701587	0.215416	9.22e-05	0.002413	Up	Yes
O-antigen flippase Wzx] [protein_id=AKB56365.1	Dimethylamine methyltransferase corrinoid protein	AKB53954.1	1004.65	0.700446	0.204595	4.44e-05	0.00135854	Up	Yes
hypothetical protein] [protein_id=AKB56002.1	Monomethylamine methyltransferase corrinoid protein	AKB53149.1	585.149	0.698819	0.149716	2.48e-07	2.05e-05	Up	Yes
	Mobile element protein	AKB54814.1	22.5496	0.696218	0.34222	0.00243849	0.027062	Up	Yes
	Mobile element protein	AKB54912.1	20.2568	0.683182	0.360293	0.00347468	0.0342565	Up	Yes
	Dimethylamine:corrinoid methyltransferase	AKB53924.1	3716	0.682417	0.318383	0.00149733	0.0191096	Up	Yes
Methionyl-tRNA formyltransferase] [protein_id=AKB53078.1	hypothetical protein	AKB54230.1	88.9519	0.678654	0.155331	1.28e-06	8.14e-05	Up	Yes
Mobile element protein] [protein_id=AKB54572.1	Monomethylamine methyltransferase corrinoid protein	AKB54849.1	542.022	0.677444	0.152844	8.1e-07	5.64e-05	Up	Yes
	hypothetical protein	AKB54709.1	36.0422	0.676625	0.342293	0.00271861	0.0291158	Up	Yes
Mobile element protein] [protein_id=AKB54812.1	cell surface protein	AKB56280.1	637.973	0.669205	0.203487	8.99e-05	0.00237491	Up	Yes
	Dimethylamine:corrinoid methyltransferase	AKB53955.1	4413.94	0.639042	0.312733	0.00209417	0.0245409	Up	Yes
Ammonium transporter] [protein_id=AKB55798.1	Sugar phosphate isomerase/epimerase	AKB53359.1	142.865	0.634783	0.180179	4.09e-05	0.00130631	Up	Yes
Tryptophan synthase beta chain 1] [protein_id=AKB54276.1	hypothetical protein	AKB54360.1	76.3965	0.629504	0.217308	0.00036259	0.00676252	Up	Yes
Homoserine O-acetyltransferase] [protein_id=AKB54256.1	anaerobic ribonucleoside-triphosphate reductase activating protein	AKB53927.1	31.9876	0.626027	0.251441	0.00111021	0.015599	Up	Yes
	hypothetical protein	AKB56179.1	34.788	0.619994	0.332789	0.00328857	0.0330988	Up	Yes
	hypothetical protein	AKB55098.1	24.1469	0.617906	0.253974	0.00137808	0.0181161	Up	Yes
Transcriptional regulator, Hth-3 family] [protein_id=AKB54890.1	Monomethylamine:corrinoid methyltransferase	AKB54848.1	1592.88	0.608471	0.120842	4.51e-08	4.18e-06	Up	Yes
Iron(III) ABC transporter, ATP-binding protein] [protein_id=AKB56078.1	hypothetical protein	AKB53194.1	84.3716	0.601169	0.23415	0.00104486	0.0150257	Up	Yes
Glycine betaine ABC transport system, glycine betaine-binding protein OpuAC] [protein_id=AKB54227.1	Monomethylamine:corrinoid methyltransferase	AKB53148.1	1609.85	0.600849	0.12056	6.03e-08	5.28e-06	Up	Yes
	Inosine-5'-monophosphate dehydrogenase	AKB56260.1	34.7637	0.600692	0.2501	0.00129591	0.0171835	Up	Yes
Iron(III) dicitrate transport system permease protein] [protein_id=AKB53823.1	Signal peptidase I	AKB56488.1	52.7763	0.600691	0.225836	0.00072646	0.0112381	Up	Yes
	ThiJ/PfpI family protein	AKB54184.1	32.5506	0.598493	0.247741	0.0013249	0.0174922	Up	Yes
Methylcobalamin:coenzyme M methyltransferase, methanol-specific] [protein_id=AKB56311.1	putative oxidoreductase/HEAT repeat-containing protein	AKB55004.1	196.318	0.596591	0.219176	0.0005446	0.00913467	Up	Yes
CO dehydrogenase/acetyl-CoA synthase subunit alpha, CO dehydrogenase subcomplex] [protein_id=AKB53626.1	hypothetical protein	AKB55825.1	81.9693	0.596204	0.197109	0.00023771	0.0048867	Up	Yes
	Dimethylamine:corrinoid methyltransferase	AKB53455.1	3272.01	0.593741	0.296182	0.00268479	0.0289561	Up	Yes
CobN component of cobalt chelatase involved in B12 biosynthesis] [protein_id=AKB53653.1	Nitrogenase (vanadium-iron) beta chain	AKB54347.1	39.2045	0.592193	0.218249	0.00059516	0.00964534	Up	Yes
hypothetical protein] [protein_id=AKB56494.1	Cell division protein FtsX	AKB53967.1	134.612	0.586823	0.139404	3.36e-06	0.0001776	Up	Yes
Nickel insertion protein] [protein_id=AKB54033.1	Glycine betaine ABC transport system, permease protein OpuAB	AKB54224.1	45.4575	0.586364	0.203641	0.00039035	0.00707489	Up	Yes
Clostripain] [protein_id=AKB55310.1	Formylmethanofuran dehydrogenase (molybdenum) subunit D	AKB53391.1	290.721	0.585072	0.152809	1.42e-05	0.00054537	Up	Yes
Mobile element protein] [protein_id=AKB53395.1	Formylmethanofuran dehydrogenase (molybdenum) subunit D	AKB53640.1	290.721	0.585072	0.152809	1.42e-05	0.00054537	Up	Yes
	hypothetical protein	AKB54722.1	27.6957	0.58168	0.242435	0.00154028	0.0193758	Up	Yes
hypothetical protein] [protein_id=AKB53054.1	hypothetical protein	AKB53816.1	1548.49	0.577305	0.146709	9.71e-06	0.00042468	Up	Yes
hypothetical protein] [protein_id=AKB53657.1	hypothetical protein	AKB55038.1	206.393	0.572061	0.191636	0.00031387	0.00612341	Up	Yes
CO dehydrogenase/acetyl-CoA synthase subunit beta, acetyl-CoA synthase] [protein_id=AKB55755.1	Glycine betaine ABC transport system, ATP-binding protein OpuAA	AKB54223.1	237.228	0.538244	0.170559	0.000179	0.00400202	Up	Yes
Methyltransferase] [protein_id=AKB53825.1	Putative deoxyribonuclease YcfH	AKB53059.1	119.886	0.538037	0.154401	6.24e-05	0.0017525	Up	Yes
Quinolinate synthetase] [protein_id=AKB54254.1	glycosyltransferase (group I)	AKB54724.1	88.7368	0.53428	0.207909	0.00115913	0.0161356	Up	Yes
Ketoisovalerate oxidoreductase subunit VorA] [protein_id=AKB55260.1	hypothetical protein	AKB54856.1	105.724	0.533694	0.159779	0.00011086	0.00267363	Up	Yes
	hypothetical protein	AKB53556.1	24.1624	0.526364	0.246103	0.00322829	0.0326951	Up	Yes
Thiamin biosynthesis protein ThiC] [protein_id=AKB56158.1	hypothetical protein	AKB54160.1	128.725	0.521107	0.186804	0.0006152	0.00986575	Up	Yes
	Chloramphenicol acetyltransferase	AKB54990.1	27.8775	0.519856	0.241547	0.00323428	0.0326951	Up	Yes
Orotate phosphoribosyltransferase related protein] [protein_id=AKB53854.1	Methyltransferase	AKB53825.1	202.769	0.519412	0.161583	0.00015834	0.00369115	Up	Yes
	hypothetical protein	AKB55939.1	35.1998	0.517914	0.225119	0.0022925	0.0259112	Up	Yes
Oligopeptide ABC transporter, periplasmic oligopeptide-binding protein OppA] [protein_id=AKB54088.1	DNA primase small subunit	AKB55885.1	80.5723	0.511304	0.166869	0.0002831	0.00559444	Up	Yes
Methyl coenzyme M reductase gamma subunit] [protein_id=AKB53098.1	putative metal dependent hydrolase	AKB53366.1	69.0846	0.511011	0.160187	0.00019264	0.00421469	Up	Yes
ABC transporter, solute-binding protein] [protein_id=AKB56082.1	ABC transporter, solute-binding protein	AKB53386.1	103.328	0.502613	0.175658	0.00050982	0.00877285	Up	Yes
FKBP-type peptidyl-prolyl cis-trans isomerase SlyD] [protein_id=AKB53721.1	hypothetical protein	AKB54732.1	237.724	0.501776	0.133898	2.7e-05	0.00094883	Up	Yes
Methanol:corrinoid methyltransferase] [protein_id=AKB53300.1	DNA-binding HTH domain in riboflavin kinase	AKB53441.1	122.256	0.499278	0.180425	0.00073027	0.0112403	Up	Yes
hypothetical protein] [protein_id=AKB53339.1	Triosephosphate isomerase	AKB53066.1	205.713	0.499256	0.125847	1.01e-05	0.00043458	Up	Yes
hypothetical protein] [protein_id=AKB55224.1	TATA-box binding protein	AKB56316.1	84.6018	0.498158	0.187286	0.0010353	0.0150257	Up	Yes
Mobile element protein] [protein_id=AKB55022.1	hypothetical protein	AKB54468.1	163.014	0.49715	0.131991	2.5e-05	0.00088965	Up	Yes
	MFS permease	AKB53608.1	35.1202	0.497148	0.239508	0.00424205	0.0398571	Up	Yes
	MDR-type permease	AKB53050.1	27.5506	0.494824	0.254837	0.00521985	0.0467497	Up	Yes
hypothetical protein] [protein_id=AKB53362.1	Carbon monoxide dehydrogenase CooS subunit	AKB55315.1	235.824	0.493971	0.134594	3.53e-05	0.00118683	Up	Yes
Iron(III) dicitrate-binding protein] [protein_id=AKB53821.1	Phosphoribosylformimino-5-aminoimidazole carboxamide ribotide isomerase	AKB53240.1	114.369	0.487599	0.161531	0.00036429	0.00676252	Up	Yes
	Cell surface protein	AKB55391.1	34.7829	0.486527	0.228134	0.00375305	0.0361496	Up	Yes
Transcriptional regulator, MerR family] [protein_id=AKB54924.1	hypothetical protein	AKB56301.1	182.562	0.486431	0.184306	0.00107571	0.0153968	Up	Yes
	Dimethylamine methyltransferase corrinoid protein	AKB53460.1	54.7113	0.482742	0.231801	0.00434549	0.04058	Up	Yes
hypothetical protein] [protein_id=AKB56301.1	ATP phosphoribosyltransferase	AKB53239.1	321.515	0.480862	0.121304	1.26e-05	0.00050623	Up	Yes
haloacid dehalogenase-like hydrolase] [protein_id=AKB54310.1	Cell division protein FtsX	AKB54857.1	77.0803	0.479065	0.146745	0.00016572	0.00376009	Up	Yes
Dipeptide transport system permease protein DppC] [protein_id=AKB53220.1	Dihydroorotate dehydrogenase electron transfer subunit	AKB53424.1	110.544	0.478491	0.172825	0.00076774	0.0117268	Up	Yes
	hypothetical protein	AKB53611.1	122.299	0.477047	0.194474	0.00192805	0.0231593	Up	Yes
	hypothetical protein	AKB53195.1	43.8228	0.476115	0.202232	0.00250696	0.0275227	Up	Yes
	metallo-beta-lactamase	AKB53058.1	72.7951	0.472905	0.192313	0.0018667	0.0225996	Up	Yes
	hypothetical protein	AKB56002.1	143.279	0.472045	0.196725	0.00209915	0.0245409	Up	Yes
hypothetical protein] [protein_id=AKB55214.1	Mobile element protein	AKB53290.1	116.967	0.469459	0.153216	0.00033928	0.00645476	Up	Yes
Sirohydrochlorin cobaltochelatase] [protein_id=AKB53573.1	Mobile element protein	AKB53831.1	116.967	0.469459	0.153216	0.00033928	0.00645476	Up	Yes
Phage shock protein A] [protein_id=AKB54760.1	Mobile element protein	AKB54673.1	116.967	0.469459	0.153216	0.00033928	0.00645476	Up	Yes
Iron(III) dicitrate-binding protein] [protein_id=AKB53820.1	Mobile element protein	AKB55022.1	116.721	0.466915	0.152918	0.00035415	0.00665504	Up	Yes
hypothetical protein] [protein_id=AKB54746.1	Formylmethanofuran dehydrogenase (molybdenum) subunit C	AKB53639.1	639.128	0.455034	0.133449	0.000102	0.00250005	Up	Yes
hypothetical protein] [protein_id=AKB54445.1	Formylmethanofuran dehydrogenase (molybdenum) subunit C	AKB53390.1	639.123	0.45482	0.133472	0.00010203	0.00250005	Up	Yes
hypothetical protein] [protein_id=AKB55520.1	Thiamine-monophosphate kinase	AKB56465.1	596.808	0.453721	0.16905	0.00109821	0.0155102	Up	Yes
V-type ATP synthase subunit I] [protein_id=AKB53593.1	Cation transporter	AKB53089.1	278.93	0.45149	0.143258	0.00027527	0.00551074	Up	Yes
Proteasome-activating AAA-ATPase (PAN), archaeal] [protein_id=AKB56180.1	Proline 2-methylase for pyrrolysine biosynthesis	AKB53154.1	301.054	0.448617	0.140957	0.00023719	0.0048867	Up	Yes
CO dehydrogenase/acetyl-CoA synthase subunit beta, acetyl-CoA synthase] [protein_id=AKB53624.1	Formylmethanofuran dehydrogenase (molybdenum) subunit B	AKB53641.1	999.916	0.444815	0.137398	0.00018304	0.00406274	Up	Yes
Dissimilatory sulfite reductase (desulfoviridin), alpha and beta subunits] [protein_id=AKB53911.1	Glycerol dehydrogenase	AKB55475.1	173.544	0.444627	0.145627	0.00038154	0.00695637	Up	Yes
Thymidylate synthase] [protein_id=AKB55418.1	hypothetical protein	AKB53362.1	246.838	0.437611	0.143464	0.00039699	0.00715287	Up	Yes
	hypothetical protein	AKB53339.1	46.8518	0.437299	0.203476	0.00481147	0.0441244	Up	Yes
Monomethylamine:corrinoid methyltransferase] [transl_except=(pos:604..606,aa:Pyl)] [protein_id=AKB53148.1	FmdE, Molybdenum formylmethanofuran dehydrogenase operon	AKB53387.1	496.786	0.434243	0.125103	8.11e-05	0.00219426	Up	Yes
	Heat shock protein 60 family co-chaperone GroES	AKB53528.1	116.709	0.434108	0.183978	0.0028783	0.0299321	Up	Yes
	ADP-ribose pyrophosphatase	AKB53116.1	410.682	0.428098	0.16096	0.00128714	0.0171835	Up	Yes
	sensory transduction histidine kinase	AKB55932.1	80.8675	0.424167	0.187598	0.00398306	0.0377713	Up	Yes
	Sensory transduction histidine kinase	AKB54622.1	76.5991	0.412531	0.171442	0.00280808	0.029756	Up	Yes
Methanophenazine hydrogenase small subunit precursor] [protein_id=AKB55557.1	Trimethylamine:corrinoid methyltransferase	AKB53459.1	223.701	0.403412	0.121222	0.00018587	0.00409578	Up	Yes
hypothetical protein] [protein_id=AKB56377.1	GTP cyclohydrolase I type 2	AKB56383.1	691.686	0.400018	0.105889	3.76e-05	0.001224	Up	Yes
Mobile element protein] [protein_id=AKB54501.1	2-isopropylmalate synthase	AKB56184.1	303.964	0.398185	0.113142	9.44e-05	0.00242992	Up	Yes
	hypothetical protein	AKB56302.1	70.4588	0.398005	0.164424	0.00287008	0.0299321	Up	Yes
	hypothetical protein	AKB56240.1	79.7187	0.387457	0.15264	0.00227103	0.0257636	Up	Yes
	DNA helicase II	AKB55892.1	115.958	0.383097	0.15509	0.00282045	0.029756	Up	Yes
Fmn-binding protein] [protein_id=AKB54032.1	hypothetical protein	AKB56437.1	337.895	0.382079	0.136835	0.00104488	0.0150257	Up	Yes
	Signal recognition particle 54 kDa protein	AKB56027.1	252.696	0.381971	0.146509	0.00199774	0.0237174	Up	Yes
hypothetical protein] [protein_id=AKB53706.1	Formylmethanofuran dehydrogenase (molybdenum) subunit B	AKB53392.1	1523.5	0.379259	0.132314	0.000818	0.0123425	Up	Yes
ChlI component of cobalt chelatase involved in B12 biosynthesis] [protein_id=AKB53658.1	ATP-utilizing enzymes of the PP-loop superfamily protein	AKB56021.1	989.664	0.376126	0.125784	0.00054874	0.00913467	Up	Yes
O-acetylhomoserine sulfhydrylase] [protein_id=AKB54255.1	Hydantoinase	AKB54991.1	185.222	0.373788	0.134353	0.00116947	0.0161356	Up	Yes
	cell surface protein	AKB54803.1	295.907	0.373741	0.142883	0.00213011	0.0247141	Up	Yes
Methyl coenzyme M reductase beta subunit] [protein_id=AKB53095.1	S-layer family duplication domain protein	AKB56466.1	2761.09	0.371209	0.106192	0.00011644	0.00278636	Up	Yes
	hypothetical protein	AKB54107.1	151.187	0.370886	0.13892	0.00179545	0.0221268	Up	Yes
hypothetical protein] [protein_id=AKB53770.1	Glutamate synthase [NADPH] large chain	AKB56227.1	846.336	0.365345	0.0751858	3.41e-07	2.61e-05	Up	Yes
	Transcriptional regulator, ArsR family	AKB56324.1	97.2544	0.343013	0.132628	0.00254353	0.0278245	Up	Yes
	Argininosuccinate lyase	AKB54044.1	261.195	0.340263	0.126417	0.00196131	0.0234668	Up	Yes
Coenzyme F420 hydrogenase subunit beta] [protein_id=AKB55695.1	DNA polymerase sliding clamp protein PCNA	AKB53113.1	515.233	0.339577	0.0990166	0.00017495	0.00394031	Up	Yes
	Hydroxymethylglutaryl-CoA reductase	AKB53691.1	242.991	0.33765	0.119007	0.00129389	0.0171835	Up	Yes
	hypothetical protein	AKB56237.1	86.2798	0.336376	0.143003	0.00497602	0.0452272	Up	Yes
	SSU ribosomal protein S13e (S15p)	AKB53826.1	456.808	0.333611	0.121766	0.00168456	0.0208899	Up	Yes
	hypothetical protein	AKB55363.1	613.138	0.332252	0.133894	0.00351533	0.0344008	Up	Yes
	6-phospho-3-hexuloisomerase	AKB54106.1	160.629	0.331513	0.12832	0.00258961	0.0280731	Up	Yes
	NMD protein affecting ribosome stability and mRNA decay	AKB55760.1	177.154	0.327259	0.133302	0.00357628	0.0348858	Up	Yes
	Prephenate dehydratase	AKB53732.1	185.324	0.323516	0.128082	0.00332192	0.0331924	Up	Yes
	Transcriptional regulator, ArsR family	AKB56306.1	151.041	0.317129	0.134274	0.00515358	0.0463057	Up	Yes
	hypothetical protein	AKB55949.1	2614.84	0.315644	0.114297	0.00182103	0.0222224	Up	Yes
	LSU ribosomal protein L27Ae (L15p)	AKB55589.1	843.256	0.313204	0.118933	0.00246843	0.0272953	Up	Yes
hypothetical protein] [protein_id=AKB53656.1	Inosine-5'-monophosphate dehydrogenase	AKB53032.1	770.008	0.310792	0.0998518	0.00059132	0.00963409	Up	Yes
	Isopentenyl-diphosphate delta-isomerase, FMN-dependent	AKB53483.1	150.118	0.310182	0.129484	0.00512577	0.0463057	Up	Yes
	putative DNA or RNA helicase of superfamily II	AKB54788.1	348.212	0.295829	0.103365	0.00149043	0.0191012	Up	Yes
	O-phosphoseryl-tRNA(Cys) synthetase	AKB56439.1	461.538	0.291196	0.108132	0.00220732	0.0254174	Up	Yes
	cell surface protein	AKB53755.1	4336.42	0.278212	0.10682	0.00347822	0.0342565	Up	Yes
	Sterol-regulatory element-binding protein intramembrane protease	AKB55139.1	395.1	0.276029	0.0952345	0.00147037	0.0190032	Up	Yes
	Translation initiation factor 2	AKB54135.1	965.954	0.271907	0.106053	0.00298089	0.0307423	Up	Yes
	Aspartyl-tRNA synthetase / Aspartyl-tRNA(Asn) synthetase	AKB55162.1	429.913	0.240585	0.0935155	0.00478823	0.0440431	Up	Yes
	Nitrogenase FeMo-cofactor synthesis FeS core scaffold and assembly protein NifB	AKB55822.1	465.761	-0.221962	0.0827818	0.00382018	0.0366809	Down	Yes
	Proteasome subunit alpha, archaeal	AKB55035.1	596.026	-0.236219	0.0894152	0.00393158	0.0375154	Down	Yes
	ABC-type nitrate/sulfonate/bicarbonate transport systems, periplasmic components	AKB56469.1	413.602	-0.274609	0.109212	0.00495953	0.0452114	Down	Yes
	Chitin binding protein	AKB55149.1	505.855	-0.290791	0.117702	0.00469754	0.043339	Down	Yes
	V-type ATP synthase subunit I	AKB53593.1	5339.9	-0.300365	0.111577	0.00231808	0.0260084	Down	Yes
	Cytosolic Fe-S cluster assembling factor NBP35	AKB56194.1	220.833	-0.31368	0.12649	0.00395504	0.037622	Down	Yes
Cysteine desulfurase] [protein_id=AKB54252.1	hypothetical protein	AKB55354.1	206.348	-0.318332	0.109528	0.00118326	0.0162526	Down	Yes
	Acetate kinase	AKB55522.1	1485.47	-0.32158	0.119209	0.00204871	0.0241354	Down	Yes
	hypothetical protein	AKB54720.1	128.902	-0.322208	0.129383	0.00363977	0.0353896	Down	Yes
	Cell division protein FtsZ	AKB55767.1	640.053	-0.3225	0.123987	0.00255629	0.0278644	Down	Yes
	Translation elongation factor 1 alpha subunit	AKB53892.1	3137.5	-0.329931	0.123537	0.00212263	0.0247141	Down	Yes
	Peptidyl-prolyl cis-trans isomerase	AKB53985.1	94.0478	-0.332642	0.138506	0.00428984	0.0401828	Down	Yes
	TldE protein, part of TldE/TldD proteolytic complex	AKB55309.1	202.396	-0.338056	0.128973	0.00243687	0.027062	Down	Yes
	V-type ATP synthase subunit B	AKB53587.1	2893.91	-0.339214	0.123808	0.00151467	0.0192507	Down	Yes
Mobile element protein] [protein_id=AKB56446.1	Orotate phosphoribosyltransferase related protein	AKB53854.1	340.744	-0.34164	0.0955605	9.59e-05	0.00243141	Down	Yes
	Heat shock protein 60 family chaperone GroEL	AKB55160.1	1327.5	-0.348694	0.135662	0.00250484	0.0275227	Down	Yes
	Ribulose-1,5-bisphosphate carboxylase, Type III	AKB53090.1	152.665	-0.352954	0.148296	0.00386622	0.037007	Down	Yes
Methanol:corrinoid methyltransferase] [protein_id=AKB56319.1	[NiFe] hydrogenase metallocenter assembly protein HypD	AKB55555.1	243.091	-0.355346	0.123645	0.00101433	0.0148655	Down	Yes
	Methyl coenzyme M reductase alpha subunit	AKB53099.1	7719.34	-0.359001	0.15619	0.00442143	0.0410389	Down	Yes
	hypothetical protein	AKB53916.1	148.635	-0.361521	0.136671	0.00192088	0.0231593	Down	Yes
	Hydantoinase	AKB55814.1	71.8039	-0.370055	0.149458	0.00280222	0.029756	Down	Yes
	Proteasome-activating AAA-ATPase (PAN), archaeal	AKB56180.1	591.114	-0.375271	0.157269	0.00351049	0.0344008	Down	Yes
	Seryl-tRNA synthetase	AKB56107.1	437.768	-0.377762	0.148698	0.00230193	0.0259221	Down	Yes
	Conserved transmembrane protein	AKB54846.1	215.226	-0.381781	0.153472	0.00291264	0.0301399	Down	Yes
	Archaeal S-adenosylmethionine synthetase	AKB53238.1	225.755	-0.381823	0.140971	0.00157264	0.0196613	Down	Yes
	Putative metal chaperone, involved in Zn homeostasis, GTPase of COG0523 family	AKB56315.1	3515.27	-0.382876	0.14657	0.0018633	0.0225996	Down	Yes
hypothetical protein] [protein_id=AKB55519.1	Tetrahedral aminopeptidase	AKB55743.1	144.296	-0.390767	0.139378	0.00102628	0.0149691	Down	Yes
	putative oxidoreductase	AKB54563.1	153.781	-0.39083	0.148607	0.00180663	0.0221348	Down	Yes
	Putative snRNP Sm-like protein	AKB54278.1	115.524	-0.397049	0.161583	0.00259376	0.0280731	Down	Yes
Glycine betaine ABC transport system, ATP-binding protein OpuAA] [protein_id=AKB54223.1	hypothetical protein	AKB55657.1	215.668	-0.397716	0.102391	2.43e-05	0.00087664	Down	Yes
	Tungsten-containing aldehyde:ferredoxin oxidoreductase	AKB54437.1	55.1769	-0.398234	0.181293	0.00491253	0.0449166	Down	Yes
	SSU ribosomal protein S23e (S12p)	AKB53889.1	449.754	-0.398889	0.176365	0.00414432	0.0390586	Down	Yes
	Molybdate-binding domain of ModE	AKB53636.1	848.092	-0.402688	0.154292	0.00179875	0.0221268	Down	Yes
	Exonuclease SbcC	AKB53557.1	78.471	-0.403913	0.176989	0.00406178	0.0383988	Down	Yes
Oligopeptide transport ATP-binding protein OppF] [protein_id=AKB53685.1	L-threonine 3-O-phosphate decarboxylase	AKB53838.1	207.746	-0.404542	0.135363	0.00061388	0.00986575	Down	Yes
	hypothetical protein	AKB56217.1	503.424	-0.405404	0.171966	0.00308216	0.0315741	Down	Yes
	SSU ribosomal protein S20e (S10p)	AKB53893.1	176.296	-0.406614	0.152726	0.00144471	0.0187506	Down	Yes
	rubredoxin-oxygen oxidoreductase	AKB55702.1	217.51	-0.410073	0.158099	0.00161586	0.0201195	Down	Yes
Iron(III) dicitrate transport ATP-binding protein FecE] [protein_id=AKB56031.1	Argininosuccinate synthase	AKB54220.1	131.761	-0.411341	0.145612	0.00099764	0.0148066	Down	Yes
	Heat shock protein 60 family chaperone GroEL	AKB56443.1	1240.11	-0.419669	0.180307	0.00338142	0.0335187	Down	Yes
	hypothetical protein	AKB53713.1	113.018	-0.419705	0.167989	0.00199045	0.0237174	Down	Yes
	hypothetical protein	AKB56264.1	165.377	-0.421186	0.179743	0.00317864	0.0323461	Down	Yes
	Phosphate transport ATP-binding protein PstB	AKB53665.1	47.738	-0.421842	0.202241	0.00548162	0.0488733	Down	Yes
	2-amino-3,7-dideoxy-D-threo-hept-6-ulosonate synthase	AKB53289.1	188.513	-0.428536	0.192216	0.00365103	0.0353896	Down	Yes
	periplasmic binding protein	AKB56033.1	87.1739	-0.430737	0.191136	0.00329583	0.0330988	Down	Yes
bifunctional 3-demethylubiquinone-9 3-methyltransferase/ 2-octaprenyl-6-hydroxy phenol methylase] [protein_id=AKB53897.1	Lead, cadmium, zinc and mercury transporting ATPase	AKB54028.1	358.4	-0.43162	0.145299	0.00049119	0.00864657	Down	Yes
hypothetical protein] [protein_id=AKB55793.1	Coenzyme B synthesis from 2-oxoglutarate: steps 1, 6, and 10	AKB55237.1	662.019	-0.440156	0.0970512	1.17e-06	7.72e-05	Down	Yes
hypothetical protein] [protein_id=AKB55621.1	[NiFe] hydrogenase nickel incorporation-associated protein HypB	AKB55553.1	173.223	-0.44534	0.135153	0.00016027	0.00369115	Down	Yes
	SSU ribosomal protein S8e	AKB53849.1	258.394	-0.448764	0.185609	0.00233393	0.0260907	Down	Yes
Cation-transporting ATPase, E1-E2 family] [protein_id=AKB54977.1	Ubiquitin-like small archaeal modifier protein SAMP2	AKB55295.1	250.937	-0.448877	0.155112	0.00058562	0.0095922	Down	Yes
	V-type ATP synthase subunit D	AKB53586.1	695.884	-0.457854	0.19831	0.00287253	0.0299321	Down	Yes
	hypothetical protein	AKB54337.1	121.923	-0.466061	0.221706	0.00449078	0.0415567	Down	Yes
	Phosphoenolpyruvate carboxylase, archaeal	AKB54119.1	71.8727	-0.469872	0.17843	0.0012399	0.0168791	Down	Yes
	ATPase component CbiO of energizing module of cobalt ECF transporter	AKB54078.1	44.4285	-0.470165	0.224414	0.00439431	0.0409112	Down	Yes
	ubiquinone/menaquinone biosynthesis methyltransferase	AKB55276.1	112.863	-0.471631	0.185416	0.00138703	0.0181558	Down	Yes
Cytosolic Fe-S cluster assembling factor NBP35] [protein_id=AKB56194.1	Inosine-5'-monophosphate dehydrogenase	AKB55421.1	231.772	-0.472165	0.14338	0.00014711	0.00346623	Down	Yes
	Dipeptide-binding ABC transporter, periplasmic substrate-binding component	AKB53218.1	214.682	-0.475905	0.207151	0.00270343	0.0290548	Down	Yes
Lead, cadmium, zinc and mercury transporting ATPase] [protein_id=AKB54030.1	V-type ATP synthase subunit K	AKB53582.1	748.547	-0.483559	0.167743	0.00053831	0.00913467	Down	Yes
	RNA-binding protein YhbY	AKB53202.1	64.6403	-0.485507	0.187265	0.00125894	0.0169874	Down	Yes
Rubrerythrin] [protein_id=AKB55701.1	V-type ATP synthase subunit K	AKB53592.1	751.684	-0.485777	0.168186	0.00054324	0.00913467	Down	Yes
	GPR1/FUN34/yaaH family protein	AKB56320.1	241.077	-0.487298	0.213165	0.00224684	0.0256794	Down	Yes
GPR1/FUN34/yaaH family protein] [protein_id=AKB56320.1	2-phospho-L-lactate transferase	AKB53531.1	122.887	-0.493769	0.171825	0.00054228	0.00913467	Down	Yes
Methanol methyltransferase corrinoid protein] [protein_id=AKB56318.1	Phosphoenolpyruvate synthase	AKB54742.1	345.264	-0.496608	0.190134	0.00100548	0.0148066	Down	Yes
Serine acetyltransferase] [protein_id=AKB54248.1	FmdE, Molybdenum formylmethanofuran dehydrogenase operon	AKB53518.1	94.0084	-0.49671	0.191642	0.00113884	0.0159282	Down	Yes
	Indolepyruvate oxidoreductase subunit IorB	AKB53804.1	56.1507	-0.497831	0.247675	0.00500788	0.0453821	Down	Yes
	hypothetical protein	AKB55624.1	212	-0.499406	0.201844	0.00154348	0.0193758	Down	Yes
Choline permease LicB] [protein_id=AKB53457.1	hypothetical protein	AKB55217.1	418.363	-0.503546	0.130571	1.67e-05	0.00063298	Down	Yes
pyridoxamine 5'-phosphate oxidase, FMN-binding family] [protein_id=AKB53443.1	inosine 5'-monophosphate dehydrogenase	AKB55271.1	74.5703	-0.509939	0.186748	0.00076953	0.0117268	Down	Yes
PQQ enzyme repeat domain protein] [protein_id=AKB53655.1	Methanol methyltransferase corrinoid protein	AKB55350.1	1549.14	-0.510676	0.196597	0.00094987	0.0141924	Down	Yes
	Oligopeptide ABC transporter, periplasmic oligopeptide-binding protein OppA	AKB55846.1	130.759	-0.511464	0.199757	0.00125652	0.0169874	Down	Yes
Dipeptide transport system permease protein DppB] [protein_id=AKB53901.1	UDP-glucose dehydrogenase	AKB53763.1	115.924	-0.512283	0.174714	0.00041041	0.00735142	Down	Yes
hypothetical protein] [protein_id=AKB54732.1	translation initiation factor IF-2 subunit beta	AKB56476.1	243.455	-0.520626	0.132131	1.05e-05	0.00044074	Down	Yes
	Indole-3-glycerol phosphate synthase	AKB54953.1	49.8173	-0.523895	0.23521	0.00274865	0.0293349	Down	Yes
	Mannose-6-phosphate isomerase	AKB55635.1	52.2307	-0.526359	0.282095	0.00515515	0.0463057	Down	Yes
SSU ribosomal protein S15Ae (S8p)] [protein_id=AKB55596.1	Oligopeptide ABC transporter, periplasmic oligopeptide-binding protein OppA	AKB54088.1	106.054	-0.5352	0.166844	0.00015938	0.00369115	Down	Yes
cell surface protein] [protein_id=AKB53504.1	hypothetical protein	AKB55960.1	94.4527	-0.535645	0.15314	5.94e-05	0.00169505	Down	Yes
DUF447 family protein] [protein_id=AKB55840.1	[NiFe] hydrogenase nickel incorporation protein HypA	AKB55554.1	61.4954	-0.537778	0.189214	0.00046977	0.00831745	Down	Yes
	ubiquinone/menaquinone biosynthesis methyltransferase	AKB53900.1	26.5513	-0.538795	0.262244	0.00369814	0.0357331	Down	Yes
cell surface protein] [protein_id=AKB53996.1	hypothetical protein	AKB55621.1	2012.1	-0.547336	0.129371	2.99e-06	0.00016967	Down	Yes
	Iron(III) dicitrate transport ATP-binding protein FecE	AKB56031.1	25.6243	-0.550281	0.267514	0.0033327	0.0331924	Down	Yes
	hypothetical protein	AKB53706.1	48.8174	-0.551063	0.262424	0.00282697	0.029756	Down	Yes
	hypothetical protein	AKB55092.1	44.2342	-0.555128	0.225761	0.00144244	0.0187506	Down	Yes
	LSU ribosomal protein L44e	AKB55887.1	144.333	-0.556495	0.23495	0.00153281	0.0193758	Down	Yes
	tRNA (Guanine37-N1) -methyltransferase	AKB53490.1	35.9295	-0.560043	0.223552	0.0012726	0.0170964	Down	Yes
Monomethylamine methyltransferase corrinoid protein] [protein_id=AKB53149.1	hypothetical protein	AKB53657.1	200.656	-0.566251	0.158637	3.89e-05	0.00125493	Down	Yes
hypothetical protein] [protein_id=AKB55466.1	Rubrerythrin	AKB55701.1	75.3422	-0.566761	0.201533	0.00046434	0.00826905	Down	Yes
Methanol:corrinoid methyltransferase] [protein_id=AKB55351.1	hypothetical protein	AKB53690.1	77.3346	-0.567189	0.214394	0.00080536	0.012212	Down	Yes
Oligopeptide transport system permease protein OppB] [protein_id=AKB53684.1	Dipeptide transport system permease protein DppB	AKB53219.1	60.6902	-0.570878	0.212751	0.00068022	0.0106302	Down	Yes
Chemotaxis protein methyltransferase CheR] [protein_id=AKB56509.1	haloacid dehalogenase-like hydrolase	AKB54310.1	1117.02	-0.571465	0.0985896	1e-09	1.39e-07	Down	Yes
Mobile element protein] [protein_id=AKB55964.1	Tryptophan synthase beta chain 1	AKB54276.1	164.853	-0.574384	0.150037	1.42e-05	0.00054537	Down	Yes
	cell surface protein	AKB54061.1	93.2174	-0.582341	0.291083	0.003145	0.0321104	Down	Yes
Chitin binding protein] [protein_id=AKB55112.1	Iron(III) dicitrate transport system permease protein	AKB53823.1	237.032	-0.586799	0.14488	6.43e-06	0.00030298	Down	Yes
Oligopeptide ABC transporter, periplasmic oligopeptide-binding protein OppA] [protein_id=AKB55467.1	PQQ enzyme repeat domain protein	AKB53654.1	52.1572	-0.588984	0.209668	0.00049981	0.00865375	Down	Yes
Phycocyanin alpha phycocyanobilin lyase] [protein_id=AKB55518.1	hypothetical protein	AKB55904.1	298.233	-0.590428	0.233882	0.00108789	0.0154986	Down	Yes
Methanophenazine hydrogenase large subunit] [protein_id=AKB55558.1	Oligopeptide transport ATP-binding protein OppF	AKB53685.1	59.254	-0.597144	0.186162	0.00014506	0.00344425	Down	Yes
L-threonine 3-O-phosphate decarboxylase] [protein_id=AKB53838.1	Rubrerythrin	AKB55861.1	154.571	-0.598416	0.199999	0.00024783	0.00506064	Down	Yes
2-phospho-L-lactate transferase] [protein_id=AKB53531.1	Dissimilatory sulfite reductase (desulfoviridin), alpha and beta subunits	AKB53911.1	640.658	-0.598652	0.213177	0.00037159	0.00681543	Down	Yes
DNA primase small subunit] [protein_id=AKB55885.1	hypothetical protein	AKB54158.1	127.408	-0.610521	0.171621	3.61e-05	0.00119022	Down	Yes
Iron(III) dicitrate-binding protein] [protein_id=AKB53822.1	acidic integral membrane protein	AKB54671.1	31.5758	-0.611696	0.226374	0.0006685	0.0105547	Down	Yes
Lead, cadmium, zinc and mercury transporting ATPase] [protein_id=AKB54028.1	Sodium/potassium-transporting ATPase, alpha subunit	AKB56310.1	91.5069	-0.614057	0.207203	0.00027018	0.00548062	Down	Yes
bifunctional phosphopantothenoylcysteine decarboxylase/phosphopantothenate synthase] [protein_id=AKB55700.1	Oligopeptide ABC transporter, periplasmic oligopeptide-binding protein OppA	AKB55467.1	67.0742	-0.616974	0.22674	0.00054664	0.00913467	Down	Yes
ABC transporter, permease protein] [protein_id=AKB54065.1	hypothetical protein	AKB53517.1	72.8759	-0.619378	0.240294	0.0008751	0.0131394	Down	Yes
hypothetical protein] [protein_id=AKB56014.1	Thiamin biosynthesis protein ThiC	AKB56158.1	1975.49	-0.622279	0.114458	5.71e-09	6.25e-07	Down	Yes
Cell division protein FtsX] [protein_id=AKB53967.1	V-type ATP synthase subunit G	AKB53594.1	383.18	-0.629332	0.182613	5.76e-05	0.00167898	Down	Yes
hypothetical protein] [protein_id=AKB55922.1	hypothetical protein	AKB53982.1	47.6586	-0.636466	0.234895	0.00066261	0.0105159	Down	Yes
	hypothetical protein	AKB55549.1	20.3806	-0.637113	0.385742	0.00548887	0.0488733	Down	Yes
Phosphate transport ATP-binding protein PstB] [protein_id=AKB53665.1	Glycogen phosphorylase	AKB54620.1	43.6508	-0.637393	0.220716	0.0003207	0.00621706	Down	Yes
Methyl coenzyme M reductase operon protein D] [protein_id=AKB53096.1	ATPase component of general energizing module of ECF transporters	AKB54939.1	52.7719	-0.6395	0.196964	0.00010603	0.00257754	Down	Yes
hypothetical protein] [protein_id=AKB56437.1	pyridoxamine 5'-phosphate oxidase, FMN-binding family	AKB54627.1	168.338	-0.643842	0.191137	7.57e-05	0.00207123	Down	Yes
hypothetical protein] [protein_id=AKB53682.1	Phage shock protein A	AKB54760.1	130.498	-0.659758	0.221544	0.00022191	0.00465557	Down	Yes
Inosine-5'-monophosphate dehydrogenase] [protein_id=AKB55421.1	hypothetical protein	AKB55446.1	221.003	-0.660703	0.223876	0.00020492	0.00442028	Down	Yes
V-type ATP synthase subunit B] [protein_id=AKB53587.1	hypothetical protein	AKB53126.1	64.3378	-0.664534	0.247421	0.00049613	0.00865375	Down	Yes
hypothetical protein] [protein_id=AKB53512.1	Dipeptide transport system permease protein DppC	AKB53220.1	39.9865	-0.667846	0.275429	0.00109883	0.0155102	Down	Yes
Formylmethanofuran dehydrogenase (molybdenum) subunit D] [protein_id=AKB53640.1	Translation initiation factor SUI1-related protein	AKB56100.1	212.076	-0.669693	0.181904	2.33e-05	0.00085018	Down	Yes
hypothetical protein] [protein_id=AKB56080.1	hypothetical protein	AKB54064.1	39.6192	-0.673247	0.235063	0.00037122	0.00681543	Down	Yes
Conserved transmembrane protein] [protein_id=AKB54846.1	Lead, cadmium, zinc and mercury transporting ATPase	AKB54030.1	52.527	-0.677446	0.259327	0.00056915	0.00942321	Down	Yes
Sugar phosphate isomerase/epimerase] [protein_id=AKB53359.1	Methylcobalamin:coenzyme M methyltransferase, methanol-specific	AKB56311.1	344.629	-0.681969	0.178546	1.02e-05	0.00043498	Down	Yes
bi-functional transferase/deacetylase] [protein_id=AKB55362.1	Oligopeptide transport system permease protein OppB	AKB53684.1	84.8036	-0.685047	0.178531	1.13e-05	0.0004668	Down	Yes
hypothetical protein] [protein_id=AKB56231.1	Cation-transporting ATPase, E1-E2 family	AKB54977.1	287.841	-0.69165	0.123376	2.23e-09	2.74e-07	Down	Yes
Ammonium transporter] [protein_id=AKB55164.1	phosphatidylethanolamine N-methyltransferase	AKB54438.1	250.968	-0.697029	0.172404	4.36e-06	0.00022241	Down	Yes
Mobile element protein] [protein_id=AKB54809.1	Energy-conserving hydrogenase (ferredoxin), subunit F	AKB55809.1	79.1463	-0.698534	0.201492	4.15e-05	0.00130971	Down	Yes
5'-methylthioadenosine phosphorylase] [protein_id=AKB54845.1	ABC transporter, permease protein	AKB54065.1	59.5957	-0.727202	0.282279	0.00063235	0.0100879	Down	Yes
Mobile element protein] [protein_id=AKB53290.1	ABC transporter, solute-binding protein	AKB56082.1	109.131	-0.733517	0.205976	2.78e-05	0.00096594	Down	Yes
Formylmethanofuran dehydrogenase (molybdenum) subunit D] [protein_id=AKB53391.1	pyridoxamine 5'-phosphate oxidase, FMN-binding family	AKB53443.1	103.436	-0.736063	0.199735	1.91e-05	0.00070571	Down	Yes
Nitrogenase (molybdenum-iron) reductase and maturation protein NifH] [protein_id=AKB55784.1	Iron(III) dicitrate-binding protein	AKB53822.1	361.969	-0.738937	0.14609	3.45e-08	3.41e-06	Down	Yes
hypothetical protein] [protein_id=AKB54683.1	5'-methylthioadenosine phosphorylase	AKB54845.1	79.6333	-0.739694	0.232668	9.75e-05	0.00244772	Down	Yes
hypothetical protein] [protein_id=AKB53701.1	bifunctional phosphopantothenoylcysteine decarboxylase/phosphopantothenate synthase	AKB55700.1	144.767	-0.739994	0.181433	3.06e-06	0.00017059	Down	Yes
hypothetical protein] [protein_id=AKB55114.1	Ribosomal RNA adenine dimethylase	AKB53683.1	99.2742	-0.742991	0.188361	6.69e-06	0.00031066	Down	Yes
Ribosomal-protein-S18p-alanine acetyltransferase] [protein_id=AKB55976.1	CobN component of cobalt chelatase involved in B12 biosynthesis	AKB53653.1	145.167	-0.743246	0.1418	1.17e-08	1.23e-06	Down	Yes
	hypothetical protein	AKB56271.1	9.07366	-0.744554	0.495737	0.00559299	0.049656	Down	Yes
Monomethylamine:corrinoid methyltransferase] [transl_except=(pos:604..606,aa:Pyl)] [protein_id=AKB54848.1	Dipeptide transport ATP-binding protein DppD	AKB53221.1	53.3056	-0.745604	0.229919	8.17e-05	0.00219426	Down	Yes
Lead, cadmium, zinc and mercury transporting ATPase] [protein_id=AKB53574.1	Vitamin B12 ABC transporter, B12-binding component BtuF	AKB54996.1	39.5478	-0.746105	0.259717	0.00027956	0.0055604	Down	Yes
Molybdenum transport system permease protein ModB] [protein_id=AKB55167.1	Copper(I) chaperone CopZ	AKB54036.1	35.6272	-0.748024	0.298394	0.00067814	0.0106302	Down	Yes
Cysteine synthase] [protein_id=AKB54249.1	Ferredoxin domain containing protein	AKB54765.1	18.55	-0.74969	0.318546	0.00116445	0.0161356	Down	Yes
Mobile element protein] [protein_id=AKB55278.1	Lead, cadmium, zinc and mercury transporting ATPase	AKB53574.1	107.148	-0.766237	0.189684	4.73e-06	0.00023349	Down	Yes
Monomethylamine methyltransferase corrinoid protein] [protein_id=AKB54849.1	hypothetical protein	AKB54960.1	38.3947	-0.768269	0.22866	4.86e-05	0.00145842	Down	Yes
Transcriptional regulator, TetR family] [protein_id=AKB54240.1	hypothetical protein	AKB55214.1	209.098	-0.769735	0.198035	7.92e-06	0.00035663	Down	Yes
	Argininosuccinate synthase	AKB54215.1	11.3306	-0.776303	0.383102	0.00226615	0.0257636	Down	Yes
putative transporter PduT for various metalloporphyrins] [protein_id=AKB53513.1	Iron(III) dicitrate-binding protein	AKB53820.1	207.572	-0.78413	0.246081	0.00010098	0.00250005	Down	Yes
Cell division protein FtsJ] [protein_id=AKB54297.1	Iron(III) dicitrate-binding protein	AKB53821.1	199.431	-0.795165	0.242697	7.36e-05	0.00204916	Down	Yes
Peptidyl-prolyl cis-trans isomerase] [protein_id=AKB53722.1	hypothetical protein	AKB56080.1	100.98	-0.796833	0.189501	1.91e-06	0.00011475	Down	Yes
Chloramphenicol acetyltransferase] [protein_id=AKB54990.1	Molybdenum transport system permease protein ModB	AKB55167.1	73.3994	-0.817071	0.199919	3.44e-06	0.00017833	Down	Yes
Phosphoenolpyruvate synthase] [protein_id=AKB54742.1	methyltransferase, UbiE/COQ5 family	AKB56081.1	47.2207	-0.824213	0.315248	0.00057514	0.00947121	Down	Yes
hypothetical protein] [protein_id=AKB54989.1	ChlI component of cobalt chelatase involved in B12 biosynthesis	AKB53658.1	282.487	-0.833708	0.130378	1.35e-11	2.43e-09	Down	Yes
Nitrogenase FeMo-cofactor scaffold and assembly protein NifE] [protein_id=AKB55789.1	hypothetical protein	AKB53041.1	376.159	-0.836488	0.150532	2.14e-09	2.74e-07	Down	Yes
Mobile element protein] [protein_id=AKB54482.1	hypothetical protein	AKB54946.1	40.0794	-0.866101	0.257029	4.41e-05	0.00135854	Down	Yes
hypothetical protein] [protein_id=AKB55107.1	Phosphatidylethanolamine N-methyltransferase	AKB56030.1	19.5892	-0.875368	0.300771	0.00020456	0.00442028	Down	Yes
Methanol methyltransferase corrinoid protein] [protein_id=AKB55350.1	Methanol:corrinoid methyltransferase	AKB56319.1	6552.37	-0.912863	0.366722	0.00035138	0.0066436	Down	Yes
Phosphinothricin N-acetyltransferase] [protein_id=AKB53633.1	PQQ enzyme repeat domain protein	AKB53655.1	81.2299	-0.914935	0.220291	1.64e-06	0.00010277	Down	Yes
DDE superfamily endonuclease] [protein_id=AKB55142.1	hypothetical protein	AKB54925.1	29.3215	-0.953287	0.30006	9.3e-05	0.002413	Down	Yes
hypothetical protein] [protein_id=AKB53998.1	Ribosomal-protein-S18p-alanine acetyltransferase	AKB53042.1	148.089	-0.986544	0.164433	1.01e-10	1.55e-08	Down	Yes
hypothetical protein] [protein_id=AKB55529.1	Rhodanese-like domain protein	AKB53833.1	62.6043	-1.00349	0.223944	3.19e-07	2.51e-05	Down	Yes
hypothetical protein] [protein_id=AKB54160.1	dTDP-4-dehydrorhamnose 3,5-epimerase	AKB54031.1	289.079	-1.01158	0.299454	1.81e-05	0.00067545	Down	Yes
hypothetical protein] [protein_id=AKB54649.1	bifunctional 3-demethylubiquinone-9 3-methyltransferase/ 2-octaprenyl-6-hydroxy phenol methylase	AKB53897.1	257.171	-1.01742	0.184054	1.64e-09	2.18e-07	Down	Yes
hypothetical protein] [protein_id=AKB53286.1	hypothetical protein	AKB55519.1	44.3969	-1.04592	0.333555	8.85e-05	0.00235801	Down	Yes
hypothetical protein] [protein_id=AKB53377.1	cell surface glycoprotein	AKB54068.1	39.5916	-1.05066	0.24359	8.53e-07	5.81e-05	Down	Yes
Cytosolic Fe-S cluster assembling factor NBP35] [protein_id=AKB55089.1	Nickel insertion protein	AKB54033.1	2463.88	-1.09447	0.301121	5.76e-06	0.00027566	Down	Yes
Argininosuccinate synthase] [protein_id=AKB54220.1	Iron(III) ABC transporter, ATP-binding protein	AKB56078.1	12.3388	-1.10345	0.405362	0.00027299	0.00550105	Down	Yes
Mobile element protein] [protein_id=AKB54814.1	hypothetical protein	AKB55466.1	87.158	-1.1135	0.195723	7.36e-10	1.07e-07	Down	Yes
hypothetical protein] [protein_id=AKB53068.1	Methanol methyltransferase corrinoid protein	AKB56318.1	3082.91	-1.12577	0.256384	3.72e-07	2.78e-05	Down	Yes
Nitrogenase (molybdenum-iron) beta chain] [protein_id=AKB55788.1	Methanol methyltransferase corrinoid protein	AKB53301.1	424.284	-1.2106	0.329268	6.86e-06	0.0003135	Down	Yes
hypothetical protein] [protein_id=AKB54978.1	Phycocyanin alpha phycocyanobilin lyase	AKB55518.1	37.9449	-1.31478	0.292048	4.04e-07	2.95e-05	Down	Yes
Phosphate acetyltransferase] [protein_id=AKB55523.1	hypothetical protein	AKB53452.1	11.1654	-1.34447	0.464776	0.00016483	0.00376009	Down	Yes
hypothetical protein] [protein_id=AKB54505.1	hypothetical protein	AKB53656.1	59.4684	-1.34626	0.209854	9e-12	1.84e-09	Down	Yes
Ribosomal-protein-S18p-alanine acetyltransferase] [protein_id=AKB54751.1	Fmn-binding protein	AKB54032.1	500.387	-1.49998	0.21755	4.91e-14	1.16e-11	Down	Yes
metallo-beta-lactamase] [protein_id=AKB53058.1	hypothetical protein	AKB55520.1	15.7708	-1.50457	0.458885	4.92e-05	0.00146264	Down	Yes
Transcriptional regulator, ArsR family] [protein_id=AKB56306.1	hypothetical protein	AKB53512.1	38.2708	-1.58288	0.527406	5.96e-05	0.00169505	Down	Yes
hypothetical protein] [protein_id=AKB54956.1	Transcriptional regulator, MerR family	AKB54924.1	474.136	-1.59293	0.296852	2.63e-09	2.99e-07	Down	Yes
Restriction endonuclease] [protein_id=AKB55505.1	Serine acetyltransferase	AKB54248.1	133.853	-2.23594	0.32261	1.02e-13	2.23e-11	Down	Yes
hypothetical protein] [protein_id=AKB56089.1	Cysteine synthase	AKB54249.1	378.58	-2.46775	0.213211	2.5e-32	1.92e-29	Down	Yes
Ferredoxin] [protein_id=AKB54738.1	Homoserine O-acetyltransferase	AKB54256.1	217.019	-2.56348	0.218901	1.03e-32	1.05e-29	Down	Yes
hypothetical protein] [protein_id=AKB56363.1	O-acetylhomoserine sulfhydrylase	AKB54255.1	528.627	-2.61376	0.202652	2.85e-39	4.36e-36	Down	Yes
hypothetical protein] [protein_id=AKB53936.1	Cysteine desulfurase	AKB54252.1	543.263	-2.71016	0.264956	5.14e-26	3.15e-23	Down	Yes
CRISPR-associated helicase Cas3] [protein_id=AKB55645.1	Quinolinate synthetase	AKB54254.1	83.5311	-2.83159	0.358041	4.2e-17	1.17e-14	Down	Yes
hypothetical protein] [protein_id=AKB53934.1	scaffold protein	AKB54253.1	239.045	-3.16699	0.233887	3.25e-43	9.95e-40	Down	Yes

## Sheet: 0˚C Na.perchlorate (Table S9)
	Table S9. Significantly differentially expressed genes of M. barkeri grown at 0˚C supplemented with Na(ClO4) (Wald test, P < 0.05). Differential expression is relative to the 0˚C perchlorate-free control.
	Abbreviations: ProteinID, GenBank protein accession number; baseMean, normalized transcript counts of all replicates normalized for sequencing depth;
	log2FoldChange, log2-fold change in expression of group relative to 0˚C perchlorate-free control; lfcSE, standard error of log2-fold change;
	padj, p-value adjusted for multiple testing using Benjamini-Hochberg correction.
Mg.perchlorate vs. Control	0˚C Na.perchlorate vs. 0˚C Control
	Protein	Protein ID	baseMean	log2FoldChange	lfcSE	pvalue	padj	regulation
Transcriptional regulator, MarR family] [protein_id=AKB53962.1	Transcriptional regulator, MarR family	AKB53962.1	34.5471	2.90528	0.747038	3.7887e-06	0.000400225	Up
polysaccharide biosynthesis protein] [protein_id=AKB53768.1	polysaccharide biosynthesis protein	AKB53768.1	34.1304	1.6148	0.649979	0.000539487	0.0104481	Up
membrane protein, putative] [protein_id=AKB55358.1	membrane protein, putative	AKB55358.1	43.389	1.46256	0.684869	0.00118445	0.0187257	Up
hypothetical protein] [protein_id=AKB53540.1	hypothetical protein	AKB53540.1	40.704	1.40113	0.604626	0.000846443	0.0146801	Up
Glycosyltransferase] [protein_id=AKB55714.1	Glycosyltransferase	AKB55714.1	61.7288	1.3295	0.439484	0.000130468	0.00618789	Up
4-carboxymuconolactone decarboxylase] [protein_id=AKB53273.1	4-carboxymuconolactone decarboxylase	AKB53273.1	47.6101	1.29155	0.533126	0.000664337	0.0116084	Up
CoB--CoM heterodisulfide reductase subunit A] [protein_id=AKB53711.1	CoB--CoM heterodisulfide reductase subunit A	AKB53711.1	429.256	1.22939	0.887227	0.00449465	0.0497407	Up
hypothetical protein] [protein_id=AKB53344.1	hypothetical protein	AKB53344.1	84.285	1.22877	0.528946	0.000908073	0.0154385	Up
Sulfopyruvate decarboxylase - alpha subunit] [protein_id=AKB55298.1	Sulfopyruvate decarboxylase - alpha subunit	AKB55298.1	253.22	1.2138	0.297516	2.85293e-06	0.000341498	Up
Mobile element protein] [protein_id=AKB53291.1	Mobile element protein	AKB53291.1	60.452	1.17253	0.470799	0.000655975	0.0115491	Up
Mobile element protein] [protein_id=AKB53832.1	Mobile element protein	AKB53832.1	60.452	1.17253	0.470799	0.000655975	0.0115491	Up
Mobile element protein] [protein_id=AKB54674.1	Mobile element protein	AKB54674.1	60.452	1.17253	0.470799	0.000655975	0.0115491	Up
Mobile element protein] [protein_id=AKB55021.1	Mobile element protein	AKB55021.1	60.452	1.17253	0.470799	0.000655975	0.0115491	Up
hypothetical protein] [protein_id=AKB54960.1	hypothetical protein	AKB54960.1	60.9422	1.1404	0.422019	0.000360613	0.00741651	Up
hypothetical protein] [protein_id=AKB56356.1	hypothetical protein	AKB56356.1	228.704	1.12533	0.285237	5.45466e-06	0.000469505	Up
hypothetical protein] [protein_id=AKB55190.1	hypothetical protein	AKB55190.1	949.655	1.11507	0.632241	0.00300919	0.0371988	Up
LSU ribosomal protein L37e] [protein_id=AKB54279.1	LSU ribosomal protein L37e	AKB54279.1	169.186	1.0921	0.333112	6.4783e-05	0.00371708	Up
hypothetical protein] [protein_id=AKB54160.1	hypothetical protein	AKB54160.1	212.063	1.07893	0.322828	5.04304e-05	0.00316758	Up
CoB--CoM heterodisulfide reductase subunit B] [protein_id=AKB53709.1	CoB--CoM heterodisulfide reductase subunit B	AKB53709.1	80.3132	1.06471	0.605334	0.00315065	0.0383356	Up
O-antigen flippase Wzx] [protein_id=AKB56365.1	O-antigen flippase Wzx	AKB56365.1	108.401	1.02445	0.462744	0.00144968	0.0214589	Up
Molybdopterin converting factor small subunit] [protein_id=AKB56063.1	Molybdopterin converting factor small subunit	AKB56063.1	60.9519	1.02028	0.593314	0.00356999	0.0425469	Up
Sodium/calcium exchanger protein] [protein_id=AKB55413.1	Sodium/calcium exchanger protein	AKB55413.1	84.314	1.01713	0.395547	0.000611298	0.0114569	Up
hypothetical protein] [protein_id=AKB56430.1	hypothetical protein	AKB56430.1	74.7255	0.990736	0.434844	0.00123039	0.0190628	Up
Kup system potassium uptake protein] [protein_id=AKB53918.1	Kup system potassium uptake protein	AKB53918.1	138.426	0.981632	0.377917	0.00058379	0.0110303	Up
Ferrous iron transport protein B] [protein_id=AKB53199.1	Ferrous iron transport protein B	AKB53199.1	540.586	0.971779	0.321197	0.000172835	0.00646443	Up
hypothetical protein] [protein_id=AKB55950.1	hypothetical protein	AKB55950.1	1072.02	0.950633	0.55279	0.00393522	0.0461891	Up
hypothetical protein] [protein_id=AKB55324.1	hypothetical protein	AKB55324.1	41.0637	0.918651	0.546112	0.00427592	0.0482685	Up
Replication factor C small subunit] [protein_id=AKB53143.1	Replication factor C small subunit	AKB53143.1	453.518	0.912672	0.275689	7.42509e-05	0.00410855	Up
hypothetical protein] [protein_id=AKB55166.1	hypothetical protein	AKB55166.1	102.423	0.89241	0.508774	0.00408721	0.0467915	Up
hypothetical protein] [protein_id=AKB56291.1	hypothetical protein	AKB56291.1	141.802	0.888265	0.303843	0.000281887	0.00646443	Up
Tyrosyl-tRNA synthetase] [protein_id=AKB55947.1	Tyrosyl-tRNA synthetase	AKB55947.1	434.861	0.845154	0.389216	0.002024	0.0274875	Up
KEOPS complex Cgi121-like subunit] [protein_id=AKB55542.1	KEOPS complex Cgi121-like subunit	AKB55542.1	105.667	0.842665	0.344853	0.00102179	0.0166059	Up
hypothetical protein] [protein_id=AKB54610.1	hypothetical protein	AKB54610.1	134.702	0.836897	0.354975	0.0012729	0.019462	Up
Heat shock protein GrpE] [protein_id=AKB54199.1	Heat shock protein GrpE	AKB54199.1	350.315	0.83158	0.302359	0.000482314	0.00958032	Up
hypothetical protein] [protein_id=AKB54733.1	hypothetical protein	AKB54733.1	71.1829	0.803948	0.450819	0.00447454	0.0497407	Up
Cytochrome c-type biogenesis protein] [protein_id=AKB54104.1	Cytochrome c-type biogenesis protein	AKB54104.1	98.679	0.79465	0.361921	0.00223651	0.0297009	Up
hypothetical protein] [protein_id=AKB56423.1	hypothetical protein	AKB56423.1	435.842	0.792805	0.312059	0.000925054	0.0155784	Up
hypothetical protein] [protein_id=AKB55220.1	hypothetical protein	AKB55220.1	272.08	0.790338	0.407723	0.00361115	0.0426563	Up
transporter, RND superfamily] [protein_id=AKB53364.1	transporter, RND superfamily	AKB53364.1	455.292	0.77427	0.239796	0.000107599	0.00546828	Up
Chitin binding protein] [protein_id=AKB53537.1	Chitin binding protein	AKB53537.1	881.546	0.770093	0.25055	0.000172894	0.00646443	Up
hypothetical protein] [protein_id=AKB53544.1	hypothetical protein	AKB53544.1	151.618	0.764894	0.359732	0.00238388	0.0309504	Up
Formylmethanofuran dehydrogenase subunit C] [protein_id=AKB53647.1	Formylmethanofuran dehydrogenase subunit C	AKB53647.1	249.633	0.762167	0.329853	0.00172405	0.024431	Up
Archaeal heat shock regulator, ArsR family] [protein_id=AKB53083.1	Archaeal heat shock regulator, ArsR family	AKB53083.1	562.52	0.734391	0.319942	0.00191641	0.0263535	Up
Formylmethanofuran dehydrogenase subunit B] [protein_id=AKB53645.1	Formylmethanofuran dehydrogenase subunit B	AKB53645.1	691.183	0.72427	0.243058	0.000259812	0.00646443	Up
cell surface protein] [protein_id=AKB53755.1	cell surface protein	AKB53755.1	7150.73	0.711847	0.169607	3.31714e-06	0.000367097	Up
Glycosyltransferase] [protein_id=AKB56425.1	Glycosyltransferase	AKB56425.1	559.01	0.711093	0.259474	0.00054711	0.010493	Up
Seryl-tRNA synthetase] [protein_id=AKB56107.1	Seryl-tRNA synthetase	AKB56107.1	678.335	0.686529	0.263437	0.000976646	0.016329	Up
translation initiation factor IF-2 subunit beta] [protein_id=AKB56473.1	translation initiation factor IF-2 subunit beta	AKB56473.1	746.679	0.651552	0.229103	0.00055084	0.010493	Up
Ribonuclease P protein component 3] [protein_id=AKB55037.1	Ribonuclease P protein component 3	AKB55037.1	169.24	0.646958	0.314052	0.00406431	0.0467819	Up
Aspartate carbamoyltransferase] [protein_id=AKB56392.1	Aspartate carbamoyltransferase	AKB56392.1	560.461	0.645381	0.20169	0.00016343	0.00646443	Up
Ribosomal protein S6] [protein_id=AKB55441.1	Ribosomal protein S6	AKB55441.1	201.4	0.634367	0.311608	0.00448702	0.0497407	Up
Protein-export membrane protein SecF] [protein_id=AKB53141.1	Protein-export membrane protein SecF	AKB53141.1	1039.15	0.628053	0.193135	0.000184208	0.00646443	Up
hypothetical protein] [protein_id=AKB54470.1	hypothetical protein	AKB54470.1	6630.47	0.602275	0.195468	0.000302418	0.00646443	Up
hypothetical protein] [protein_id=AKB53796.1	hypothetical protein	AKB53796.1	6631.04	0.602142	0.195425	0.000302551	0.00646443	Up
hypothetical protein] [protein_id=AKB53922.1	hypothetical protein	AKB53922.1	6631.04	0.602142	0.195425	0.000302551	0.00646443	Up
hypothetical protein] [protein_id=AKB54021.1	hypothetical protein	AKB54021.1	6631.04	0.602142	0.195425	0.000302551	0.00646443	Up
hypothetical protein] [protein_id=AKB54153.1	hypothetical protein	AKB54153.1	6631.04	0.602142	0.195425	0.000302551	0.00646443	Up
hypothetical protein] [protein_id=AKB54226.1	hypothetical protein	AKB54226.1	6631.04	0.602142	0.195425	0.000302551	0.00646443	Up
hypothetical protein] [protein_id=AKB54250.1	hypothetical protein	AKB54250.1	6631.04	0.602142	0.195425	0.000302551	0.00646443	Up
hypothetical protein] [protein_id=AKB54339.1	hypothetical protein	AKB54339.1	6631.04	0.602142	0.195425	0.000302551	0.00646443	Up
hypothetical protein] [protein_id=AKB54496.1	hypothetical protein	AKB54496.1	6631.04	0.602142	0.195425	0.000302551	0.00646443	Up
hypothetical protein] [protein_id=AKB54518.1	hypothetical protein	AKB54518.1	6631.04	0.602142	0.195425	0.000302551	0.00646443	Up
hypothetical protein] [protein_id=AKB54411.1	hypothetical protein	AKB54411.1	6631.03	0.602142	0.195426	0.000302567	0.00646443	Up
hypothetical protein] [protein_id=AKB53160.1	hypothetical protein	AKB53160.1	6630.98	0.60214	0.195428	0.000302601	0.00646443	Up
hypothetical protein] [protein_id=AKB53282.1	hypothetical protein	AKB53282.1	6630.98	0.60214	0.195428	0.000302601	0.00646443	Up
hypothetical protein] [protein_id=AKB53397.1	hypothetical protein	AKB53397.1	6630.98	0.60214	0.195428	0.000302601	0.00646443	Up
hypothetical protein] [protein_id=AKB53405.1	hypothetical protein	AKB53405.1	6630.98	0.60214	0.195428	0.000302601	0.00646443	Up
hypothetical protein] [protein_id=AKB53411.1	hypothetical protein	AKB53411.1	6630.98	0.60214	0.195428	0.000302601	0.00646443	Up
hypothetical protein] [protein_id=AKB53461.1	hypothetical protein	AKB53461.1	6630.98	0.60214	0.195428	0.000302601	0.00646443	Up
hypothetical protein] [protein_id=AKB53776.1	hypothetical protein	AKB53776.1	6630.98	0.60214	0.195428	0.000302601	0.00646443	Up
hypothetical protein] [protein_id=AKB54546.1	hypothetical protein	AKB54546.1	6631.09	0.602139	0.195429	0.000302621	0.00646443	Up
hypothetical protein] [protein_id=AKB54752.1	hypothetical protein	AKB54752.1	6631.09	0.602139	0.195429	0.000302621	0.00646443	Up
hypothetical protein] [protein_id=AKB54933.1	hypothetical protein	AKB54933.1	6631.09	0.602139	0.195429	0.000302621	0.00646443	Up
hypothetical protein] [protein_id=AKB55074.1	hypothetical protein	AKB55074.1	6631.09	0.602139	0.195429	0.000302621	0.00646443	Up
hypothetical protein] [protein_id=AKB55121.1	hypothetical protein	AKB55121.1	6631.09	0.602139	0.195429	0.000302621	0.00646443	Up
hypothetical protein] [protein_id=AKB55250.1	hypothetical protein	AKB55250.1	6631.09	0.602139	0.195429	0.000302621	0.00646443	Up
hypothetical protein] [protein_id=AKB55326.1	hypothetical protein	AKB55326.1	6631.09	0.602139	0.195429	0.000302621	0.00646443	Up
hypothetical protein] [protein_id=AKB55359.1	hypothetical protein	AKB55359.1	6631.09	0.602139	0.195429	0.000302621	0.00646443	Up
hypothetical protein] [protein_id=AKB55618.1	hypothetical protein	AKB55618.1	6631.09	0.602139	0.195429	0.000302621	0.00646443	Up
hypothetical protein] [protein_id=AKB55656.1	hypothetical protein	AKB55656.1	6631.09	0.602139	0.195429	0.000302621	0.00646443	Up
hypothetical protein] [protein_id=AKB55676.1	hypothetical protein	AKB55676.1	6631.09	0.602139	0.195429	0.000302621	0.00646443	Up
hypothetical protein] [protein_id=AKB55711.1	hypothetical protein	AKB55711.1	6631.09	0.602139	0.195429	0.000302621	0.00646443	Up
hypothetical protein] [protein_id=AKB55740.1	hypothetical protein	AKB55740.1	6631.09	0.602139	0.195429	0.000302621	0.00646443	Up
hypothetical protein] [protein_id=AKB53005.1	hypothetical protein	AKB53005.1	6631.26	0.602122	0.195428	0.000302713	0.00646443	Up
hypothetical protein] [protein_id=AKB56432.1	hypothetical protein	AKB56432.1	6631.26	0.602122	0.195428	0.000302713	0.00646443	Up
hypothetical protein] [protein_id=AKB56468.1	hypothetical protein	AKB56468.1	6631.26	0.602122	0.195428	0.000302713	0.00646443	Up
hypothetical protein] [protein_id=AKB56515.1	hypothetical protein	AKB56515.1	6631.26	0.602122	0.195428	0.000302713	0.00646443	Up
hypothetical protein] [protein_id=AKB55105.1	hypothetical protein	AKB55105.1	6630.98	0.602072	0.195424	0.000302938	0.00646443	Up
hypothetical protein] [protein_id=AKB55759.1	hypothetical protein	AKB55759.1	6631.21	0.602051	0.195411	0.000302867	0.00646443	Up
hypothetical protein] [protein_id=AKB55872.1	hypothetical protein	AKB55872.1	6631.21	0.602051	0.195411	0.000302867	0.00646443	Up
hypothetical protein] [protein_id=AKB55905.1	hypothetical protein	AKB55905.1	6631.21	0.602051	0.195411	0.000302867	0.00646443	Up
hypothetical protein] [protein_id=AKB56325.1	hypothetical protein	AKB56325.1	6631.21	0.602051	0.195411	0.000302867	0.00646443	Up
Prephenate dehydratase] [protein_id=AKB53732.1	Prephenate dehydratase	AKB53732.1	285.409	0.599506	0.228611	0.00120491	0.0188664	Up
hypothetical protein] [protein_id=AKB55489.1	hypothetical protein	AKB55489.1	28719.9	0.58764	0.237791	0.00185893	0.0257152	Up
Diaminopimelate decarboxylase] [protein_id=AKB55913.1	Diaminopimelate decarboxylase	AKB55913.1	220.804	0.554793	0.248678	0.00351106	0.0423326	Up
Dihydrodipicolinate synthase] [protein_id=AKB56403.1	Dihydrodipicolinate synthase	AKB56403.1	825.089	0.534976	0.228521	0.00308402	0.0378386	Up
hypothetical protein] [protein_id=AKB54692.1	hypothetical protein	AKB54692.1	457.041	0.534847	0.239699	0.00397574	0.0461981	Up
PUA-PAPS reductase like fusion] [protein_id=AKB54791.1	PUA-PAPS reductase like fusion	AKB54791.1	389.868	0.526425	0.194897	0.00132999	0.0200707	Up
IMP cyclohydrolase] [protein_id=AKB56133.1	IMP cyclohydrolase	AKB56133.1	729.775	0.524753	0.166382	0.000307731	0.00650153	Up
Molybdopterin biosynthesis protein MoeA] [protein_id=AKB56137.1	Molybdopterin biosynthesis protein MoeA	AKB56137.1	593.626	0.414	0.16114	0.00282284	0.0358395	Up
hypothetical protein] [protein_id=AKB53855.1	hypothetical protein	AKB53855.1	667.736	-0.499641	0.175475	0.0009101	0.0154385	Down
Lead, cadmium, zinc and mercury transporting ATPase] [protein_id=AKB53177.1	Lead, cadmium, zinc and mercury transporting ATPase	AKB53177.1	390.776	-0.56573	0.253404	0.0035428	0.0424405	Down
Substrate-specific component NikM of nickel ECF transporter] [protein_id=AKB56129.1	Substrate-specific component NikM of nickel ECF transporter	AKB56129.1	949.057	-0.574812	0.258803	0.00361587	0.0426563	Down
LSU ribosomal protein L27Ae (L15p)] [protein_id=AKB55589.1	LSU ribosomal protein L27Ae (L15p)	AKB55589.1	1388.46	-0.579802	0.211335	0.000887139	0.0152719	Down
Pyrrolysyl-tRNA synthetase] [protein_id=AKB53153.1	Pyrrolysyl-tRNA synthetase	AKB53153.1	1614.68	-0.594372	0.191302	0.000288625	0.00646443	Down
Universal stress protein] [protein_id=AKB53169.1	Universal stress protein	AKB53169.1	956.968	-0.612453	0.271488	0.00283755	0.0358395	Down
Iron-sulfur cluster assembly protein SufB] [protein_id=AKB56333.1	Iron-sulfur cluster assembly protein SufB	AKB56333.1	480.502	-0.613813	0.270707	0.00291898	0.0362765	Down
Lead, cadmium, zinc and mercury transporting ATPase] [protein_id=AKB54028.1	Lead, cadmium, zinc and mercury transporting ATPase	AKB54028.1	570.309	-0.635539	0.246018	0.00120959	0.0188664	Down
putative metal dependent hydrolase] [protein_id=AKB53366.1	putative metal dependent hydrolase	AKB53366.1	111.432	-0.637829	0.310767	0.00427854	0.0482685	Down
SSU ribosomal protein S3e (S3p)] [protein_id=AKB55604.1	SSU ribosomal protein S3e (S3p)	AKB55604.1	3573.4	-0.642513	0.314751	0.00427839	0.0482685	Down
Transmembrane component NikQ of energizing module of nickel ECF transporter] [protein_id=AKB55171.1	Transmembrane component NikQ of energizing module of nickel ECF transporter	AKB55171.1	183.672	-0.65382	0.315995	0.00396634	0.0461981	Down
2-oxoglutarate oxidoreductase, alpha subunit] [protein_id=AKB55213.1	2-oxoglutarate oxidoreductase, alpha subunit	AKB55213.1	386.347	-0.657316	0.272865	0.00181005	0.0253407	Down
Formylmethanofuran dehydrogenase (molybdenum) subunit B] [protein_id=AKB53641.1	Formylmethanofuran dehydrogenase (molybdenum) subunit B	AKB53641.1	1644.34	-0.662147	0.220295	0.000326685	0.00677871	Down
hypothetical protein] [protein_id=AKB53507.1	hypothetical protein	AKB53507.1	253.488	-0.665422	0.23889	0.000638383	0.0115491	Down
SSU ribosomal protein S2e (S5p)] [protein_id=AKB55591.1	SSU ribosomal protein S2e (S5p)	AKB55591.1	2590.65	-0.670956	0.271782	0.00147719	0.0217278	Down
LSU ribosomal protein L12e (L11p)] [protein_id=AKB56175.1	LSU ribosomal protein L12e (L11p)	AKB56175.1	1263.18	-0.671322	0.338506	0.00443855	0.0497407	Down
5-tetrahydromethanopterin:corrinoid iron-sulfur protein methyltransferase] [protein_id=AKB55758.1	5-tetrahydromethanopterin:corrinoid iron-sulfur protein methyltransferase	AKB55758.1	2226.29	-0.674506	0.194508	6.55767e-05	0.00371708	Down
Dimethylamine methyltransferase corrinoid protein] [protein_id=AKB53925.1	Dimethylamine methyltransferase corrinoid protein	AKB53925.1	1201.93	-0.680211	0.281544	0.00163821	0.0236472	Down
Glycine betaine ABC transport system, ATP-binding protein OpuAA] [protein_id=AKB54223.1	Glycine betaine ABC transport system, ATP-binding protein OpuAA	AKB54223.1	399.745	-0.687833	0.306328	0.00243397	0.0314253	Down
Inosine-5'-monophosphate dehydrogenase] [protein_id=AKB55421.1	Inosine-5'-monophosphate dehydrogenase	AKB55421.1	359.156	-0.689575	0.25036	0.000647639	0.0115491	Down
CoB--CoM heterodisulfide reductase subunit A] [protein_id=AKB54490.1	CoB--CoM heterodisulfide reductase subunit A	AKB54490.1	350.498	-0.692691	0.29168	0.00171117	0.0243972	Down
FmdE, Molybdenum formylmethanofuran dehydrogenase operon] [protein_id=AKB53387.1	FmdE, Molybdenum formylmethanofuran dehydrogenase operon	AKB53387.1	790.351	-0.692806	0.224811	0.000237504	0.00646443	Down
Dimethylamine methyltransferase corrinoid protein] [protein_id=AKB53954.1	Dimethylamine methyltransferase corrinoid protein	AKB53954.1	1759.35	-0.700281	0.241598	0.000412501	0.0083361	Down
5-tetrahydromethanopterin:corrinoid iron-sulfur protein methyltransferase] [protein_id=AKB53621.1	5-tetrahydromethanopterin:corrinoid iron-sulfur protein methyltransferase	AKB53621.1	2824.18	-0.708206	0.215668	0.000117828	0.00570484	Down
CO dehydrogenase/acetyl-CoA synthase subunit delta, corrinoid iron-sulfur subcomplex small subunit] [protein_id=AKB55757.1	CO dehydrogenase/acetyl-CoA synthase subunit delta, corrinoid iron-sulfur subcomplex small subunit	AKB55757.1	2433.21	-0.713798	0.19524	2.52491e-05	0.00183371	Down
DNA gyrase subunit B] [protein_id=AKB54645.1	DNA gyrase subunit B	AKB54645.1	612.17	-0.718625	0.223268	0.000138331	0.00630357	Down
CO dehydrogenase/acetyl-CoA synthase subunit delta, corrinoid iron-sulfur subcomplex small subunit] [protein_id=AKB53622.1	CO dehydrogenase/acetyl-CoA synthase subunit delta, corrinoid iron-sulfur subcomplex small subunit	AKB53622.1	2380.46	-0.723686	0.203296	4.23177e-05	0.00289254	Down
Deacetylase] [protein_id=AKB54800.1	Deacetylase	AKB54800.1	180.723	-0.731801	0.320409	0.00198108	0.0270825	Down
Formylmethanofuran dehydrogenase (molybdenum) subunit B] [protein_id=AKB53392.1	Formylmethanofuran dehydrogenase (molybdenum) subunit B	AKB53392.1	2423.24	-0.737532	0.231438	0.000152397	0.00646443	Down
hypothetical protein] [protein_id=AKB55659.1	hypothetical protein	AKB55659.1	204.978	-0.750709	0.294177	0.00100766	0.0166059	Down
Catalase] [protein_id=AKB53616.1	Catalase	AKB53616.1	486.877	-0.757798	0.304918	0.0011056	0.0178432	Down
CO dehydrogenase/acetyl-CoA synthase subunit beta, acetyl-CoA synthase] [protein_id=AKB53624.1	CO dehydrogenase/acetyl-CoA synthase subunit beta, acetyl-CoA synthase	AKB53624.1	2733.51	-0.75799	0.216797	4.97012e-05	0.00316758	Down
CO dehydrogenase/acetyl-CoA synthase subunit beta, acetyl-CoA synthase] [protein_id=AKB55755.1	CO dehydrogenase/acetyl-CoA synthase subunit beta, acetyl-CoA synthase	AKB55755.1	2733.48	-0.758011	0.216773	4.96112e-05	0.00316758	Down
hypothetical protein] [protein_id=AKB53682.1	hypothetical protein	AKB53682.1	168.846	-0.7647	0.343414	0.002153	0.0287561	Down
hypothetical protein] [protein_id=AKB55624.1	hypothetical protein	AKB55624.1	317.442	-0.766726	0.332103	0.0018222	0.025358	Down
Acetolactate synthase large subunit] [protein_id=AKB54748.1	Acetolactate synthase large subunit	AKB54748.1	90.097	-0.78227	0.376831	0.00288468	0.036043	Down
ubiquinone/menaquinone biosynthesis methyltransferase] [protein_id=AKB55276.1	ubiquinone/menaquinone biosynthesis methyltransferase	AKB55276.1	176.911	-0.794729	0.330012	0.00131765	0.0200145	Down
Dipeptide transport system permease protein DppB] [protein_id=AKB53383.1	Dipeptide transport system permease protein DppB	AKB53383.1	428.03	-0.79963	0.374305	0.00235411	0.0309093	Down
NADH-plastoquinone oxidoreductase subunit] [protein_id=AKB53152.1	NADH-plastoquinone oxidoreductase subunit	AKB53152.1	558.546	-0.801215	0.195669	4.32491e-06	0.000437004	Down
hypothetical protein] [protein_id=AKB55825.1	hypothetical protein	AKB55825.1	123.706	-0.820471	0.387068	0.00245357	0.0315032	Down
hypothetical protein] [protein_id=AKB54259.1	hypothetical protein	AKB54259.1	417.267	-0.831025	0.360969	0.00156785	0.0229162	Down
bifunctional phosphopantothenoylcysteine decarboxylase/phosphopantothenate synthase] [protein_id=AKB55700.1	tRNA S(4)U 4-thiouridine synthase (former ThiI)	AKB55700.1	231.501	-0.831443	0.36872	0.00176531	0.0248641	Down
DNA topoisomerase VI subunit A] [protein_id=AKB54646.1	DNA topoisomerase VI subunit A	AKB54646.1	108.375	-0.832696	0.411688	0.00277337	0.0354138	Down
CobN-like chelatase BtuS for metalloporphyrine salvage] [protein_id=AKB54638.1	CobN-like chelatase BtuS for metalloporphyrine salvage	AKB54638.1	142.999	-0.839082	0.356061	0.00138225	0.0207249	Down
Methylcobalamin:coenzyme M methyltransferase, methanol-specific] [protein_id=AKB56311.1	Methylcobalamin:coenzyme M methyltransferase, methanol-specific	AKB56311.1	518.262	-0.843034	0.272284	0.000167992	0.00646443	Down
Isopentenyl phosphate kinase] [protein_id=AKB53482.1	Isopentenyl phosphate kinase	AKB53482.1	212.301	-0.852073	0.396665	0.00213186	0.0286384	Down
LSU ribosomal protein L11e (L5p)] [protein_id=AKB55598.1	LSU ribosomal protein L11e (L5p)	AKB55598.1	1400.42	-0.862151	0.267849	0.000108236	0.00546828	Down
hypothetical protein] [protein_id=AKB56119.1	hypothetical protein	AKB56119.1	220.77	-0.867475	0.350223	0.000989469	0.0164252	Down
Oligopeptide ABC transporter, periplasmic oligopeptide-binding protein OppA] [protein_id=AKB55467.1	Oligopeptide ABC transporter, periplasmic oligopeptide-binding protein OppA	AKB55467.1	107.185	-0.876634	0.484837	0.00406624	0.0467819	Down
Thioredoxin reductase] [protein_id=AKB54427.1	Thioredoxin reductase	AKB54427.1	1012.19	-0.890995	0.283928	0.000146001	0.00646443	Down
tetratricopeptide repeat family protein] [protein_id=AKB55073.1	tetratricopeptide repeat family protein	AKB55073.1	65.2296	-0.901744	0.441325	0.00287082	0.036043	Down
Superoxide dismutase (Mn/Fe)] [protein_id=AKB54775.1	Superoxide dismutase (Mn/Fe)	AKB54775.1	1172.81	-0.925636	0.212396	1.03098e-06	0.000143927	Down
Alpha-amylase] [protein_id=AKB56104.1	Alpha-amylase	AKB56104.1	126.634	-0.929176	0.344495	0.000510871	0.0100616	Down
hypothetical protein] [protein_id=AKB54029.1	hypothetical protein	AKB54029.1	94.6728	-0.930568	0.402889	0.00140112	0.0208731	Down
CobN-like chelatase BtuS for metalloporphyrine salvage] [protein_id=AKB53516.1	CobN-like chelatase BtuS for metalloporphyrine salvage	AKB53516.1	176.926	-0.946072	0.314779	0.000196009	0.00646443	Down
PQQ enzyme repeat domain protein] [protein_id=AKB53655.1	PQQ enzyme repeat domain protein	AKB53655.1	126.948	-0.956154	0.405259	0.00113827	0.0182437	Down
Additional substrate-specific component NikN of nickel ECF transporter] [protein_id=AKB56130.1	Additional substrate-specific component NikN of nickel ECF transporter	AKB56130.1	603.724	-0.9575	0.265141	2.40863e-05	0.00180569	Down
hypothetical protein] [protein_id=AKB55465.1	hypothetical protein	AKB55465.1	63.952	-0.986554	0.486774	0.00237354	0.0309504	Down
hypothetical protein] [protein_id=AKB54661.1	hypothetical protein	AKB54661.1	319.61	-0.987622	0.325021	0.000170611	0.00646443	Down
Zinc finger protein] [protein_id=AKB54403.1	Zinc finger protein	AKB54403.1	271.896	-0.989113	0.381901	0.000632545	0.0115491	Down
CO dehydrogenase/acetyl-CoA synthase subunit epsilon, CO dehydrogenase subcomplex] [protein_id=AKB53625.1	CO dehydrogenase/acetyl-CoA synthase subunit epsilon, CO dehydrogenase subcomplex	AKB53625.1	804.775	-0.995473	0.213898	2.62076e-07	5.07553e-05	Down
Methylcobalamin:coenzyme M methyltransferase, methanol-specific] [protein_id=AKB55352.1	Methylcobalamin:coenzyme M methyltransferase, methanol-specific	AKB55352.1	383.157	-1.00155	0.249419	4.69746e-06	0.000437156	Down
CO dehydrogenase/acetyl-CoA synthase subunit alpha, CO dehydrogenase subcomplex] [protein_id=AKB55753.1	CO dehydrogenase/acetyl-CoA synthase subunit alpha, CO dehydrogenase subcomplex	AKB55753.1	1460.73	-1.01487	0.219625	3.02162e-07	5.40172e-05	Down
Protein-disulfide reductase] [protein_id=AKB54404.1	Protein-disulfide reductase	AKB54404.1	1011.1	-1.02024	0.330178	0.000135408	0.00629376	Down
hypothetical protein] [protein_id=AKB55956.1	hypothetical protein	AKB55956.1	77.7178	-1.02256	0.498524	0.00203436	0.0274875	Down
Dissimilatory sulfite reductase (desulfoviridin), alpha and beta subunits] [protein_id=AKB53911.1	Dissimilatory sulfite reductase (desulfoviridin), alpha and beta subunits	AKB53911.1	989.354	-1.02508	0.363419	0.000303194	0.00646443	Down
SSU ribosomal protein S14e (S11p)] [protein_id=AKB55576.1	SSU ribosomal protein S14e (S11p)	AKB55576.1	635.897	-1.02624	0.352753	0.000286966	0.00646443	Down
Monomethylamine permease] [protein_id=AKB53147.1	Monomethylamine permease	AKB53147.1	316.109	-1.04167	0.329857	0.000103093	0.00544517	Down
CO dehydrogenase/acetyl-CoA synthase subunit alpha, CO dehydrogenase subcomplex] [protein_id=AKB53626.1	CO dehydrogenase/acetyl-CoA synthase subunit alpha, CO dehydrogenase subcomplex	AKB53626.1	5263.44	-1.0419	0.224235	2.60948e-07	5.07553e-05	Down
hypothetical protein] [protein_id=AKB54737.1	hypothetical protein	AKB54737.1	139.536	-1.04878	0.334647	0.000113056	0.00559025	Down
Copper(I) chaperone CopZ] [protein_id=AKB54036.1	Copper(I) chaperone CopZ	AKB54036.1	57.8097	-1.05211	0.604771	0.00351558	0.0423326	Down
ferredoxin] [protein_id=AKB56249.1	ferredoxin	AKB56249.1	83.3299	-1.06029	0.435289	0.00117064	0.018634	Down
hypothetical protein] [protein_id=AKB53444.1	hypothetical protein	AKB53444.1	345.154	-1.08839	0.39973	0.00036949	0.0075324	Down
hypothetical protein] [protein_id=AKB53449.1	hypothetical protein	AKB53449.1	301.098	-1.10012	0.33114	5.75509e-05	0.00351969	Down
response regulator receiver] [protein_id=AKB53960.1	response regulator receiver	AKB53960.1	186.651	-1.10121	0.334586	6.44488e-05	0.00371708	Down
Methanol methyltransferase corrinoid protein] [protein_id=AKB53301.1	Methanol methyltransferase corrinoid protein	AKB53301.1	557.925	-1.12409	0.585569	0.0023344	0.0308246	Down
Heat shock protein] [protein_id=AKB55512.1	Heat shock protein	AKB55512.1	56.6247	-1.12718	0.530468	0.00160368	0.0232934	Down
hypothetical protein] [protein_id=AKB55827.1	hypothetical protein	AKB55827.1	42.7081	-1.15313	0.556554	0.00168489	0.0241709	Down
Methanol methyltransferase corrinoid protein] [protein_id=AKB55350.1	Methanol methyltransferase corrinoid protein	AKB55350.1	2482.25	-1.15884	0.310492	1.2192e-05	0.000977043	Down
Lead, cadmium, zinc and mercury transporting ATPase] [protein_id=AKB54030.1	Lead, cadmium, zinc and mercury transporting ATPase	AKB54030.1	83.838	-1.20984	0.486762	0.000646062	0.0115491	Down
Metal dependent hydrolase] [protein_id=AKB54728.1	Metal dependent hydrolase	AKB54728.1	41.2988	-1.21389	0.53046	0.00101558	0.0166059	Down
Methanol methyltransferase corrinoid protein] [protein_id=AKB56318.1	Methanol methyltransferase corrinoid protein	AKB56318.1	4630.32	-1.2142	0.44432	0.000326372	0.00677871	Down
hypothetical protein] [protein_id=AKB54402.1	hypothetical protein	AKB54402.1	387.808	-1.29493	0.362474	1.86367e-05	0.00144372	Down
hypothetical protein] [protein_id=AKB53909.1	hypothetical protein	AKB53909.1	419.962	-1.33085	0.61839	0.00125706	0.019347	Down
hypothetical protein] [protein_id=AKB53512.1	hypothetical protein	AKB53512.1	53.6481	-1.33318	0.77033	0.00309352	0.0378386	Down
Oligopeptide transport ATP-binding protein OppF] [protein_id=AKB53380.1	Oligopeptide transport ATP-binding protein OppF	AKB53380.1	63.8997	-1.3349	0.453693	0.000168433	0.00646443	Down
hypothetical protein] [protein_id=AKB53910.1	hypothetical protein	AKB53910.1	189.495	-1.34197	0.341038	4.89072e-06	0.000437156	Down
GPR1/FUN34/yaaH family protein] [protein_id=AKB56320.1	GPR1/FUN34/yaaH family protein	AKB56320.1	359.667	-1.36079	0.33485	2.93888e-06	0.000341498	Down
Nitroreductase family protein] [protein_id=AKB53704.1	Nitroreductase family protein	AKB53704.1	40.6759	-1.40083	0.530012	0.000481808	0.00958032	Down
hypothetical protein] [protein_id=AKB55016.1	hypothetical protein	AKB55016.1	73.1489	-1.41553	0.474333	0.000101984	0.00544517	Down
Dimethylamine:corrinoid methyltransferase] [transl_except=(pos:1066..1068,aa:Pyl)] [protein_id=AKB53924.1	Dimethylamine:corrinoid methyltransferase	AKB53924.1	6682.64	-1.42327	0.320531	2.106e-08	6.11792e-06	Down
Methylthiol:coenzyme M methyltransferase corrinoid protein] [protein_id=AKB54539.1	Methylthiol:coenzyme M methyltransferase corrinoid protein	AKB54539.1	184.384	-1.43359	0.380672	9.20999e-06	0.000764429	Down
Dimethylamine:corrinoid methyltransferase] [transl_except=(pos:1066..1068,aa:Pyl)] [protein_id=AKB53455.1	Dimethylamine:corrinoid methyltransferase	AKB53455.1	5806.9	-1.44434	0.300574	9.11294e-08	2.11785e-05	Down
LSU ribosomal protein L35e (L29p)] [protein_id=AKB55603.1	LSU ribosomal protein L35e (L29p)	AKB55603.1	647.946	-1.46332	0.346905	1.39013e-06	0.000179482	Down
Methylthiol:coenzyme M methyltransferase corrinoid protein] [protein_id=AKB54541.1	Methylthiol:coenzyme M methyltransferase corrinoid protein	AKB54541.1	80.9412	-1.48885	0.507888	0.000170921	0.00646443	Down
hypothetical protein] [protein_id=AKB55072.1	hypothetical protein	AKB55072.1	62.2917	-1.49583	0.515002	0.000168098	0.00646443	Down
Dimethylamine:corrinoid methyltransferase] [transl_except=(pos:1066..1068,aa:Pyl)] [protein_id=AKB53955.1	Dimethylamine:corrinoid methyltransferase	AKB53955.1	7881.34	-1.58417	0.307837	1.51249e-08	5.02146e-06	Down
Methanol:corrinoid methyltransferase] [protein_id=AKB53300.1	Methanol:corrinoid methyltransferase	AKB53300.1	692.697	-1.59564	0.357367	4.35488e-07	7.22019e-05	Down
Peptide methionine sulfoxide reductase MsrA] [protein_id=AKB54514.1	Peptide methionine sulfoxide reductase MsrA	AKB54514.1	46.0898	-1.62426	0.48711	3.22758e-05	0.002273	Down
Rhodanese-like domain protein] [protein_id=AKB53833.1	Rhodanese-like domain protein	AKB53833.1	100.673	-1.68321	0.34255	4.95453e-08	1.27937e-05	Down
Thymidylate synthase] [protein_id=AKB55418.1	Thymidylate synthase	AKB55418.1	89.459	-1.7384	0.447041	4.87624e-06	0.000437156	Down
Fmn-binding protein] [protein_id=AKB54032.1	Fmn-binding protein	AKB54032.1	815.135	-1.78832	0.293138	6.1361e-11	7.13014e-08	Down
3-oxoacyl-[acyl-carrier protein] reductase] [protein_id=AKB55102.1	3-oxoacyl-[acyl-carrier protein] reductase	AKB55102.1	44.5679	-1.82024	0.750207	0.000518531	0.0101266	Down
dTDP-4-dehydrorhamnose 3,5-epimerase] [protein_id=AKB54031.1	dTDP-4-dehydrorhamnose 3,5-epimerase	AKB54031.1	433.815	-1.82601	0.337517	4.68371e-09	2.72123e-06	Down
Dimethylamine permease] [protein_id=AKB53956.1	Dimethylamine permease	AKB53956.1	1485.8	-1.95812	0.44231	4.66019e-07	7.22019e-05	Down
Methanol:corrinoid methyltransferase] [protein_id=AKB55351.1	Methanol:corrinoid methyltransferase	AKB55351.1	3010.08	-1.98982	0.339473	2.45616e-10	1.9027e-07	Down
Methanol:corrinoid methyltransferase] [protein_id=AKB56319.1	Methanol:corrinoid methyltransferase	AKB56319.1	10009.3	-2.14055	0.412895	1.09057e-08	4.22416e-06	Down
Nickel insertion protein] [protein_id=AKB54033.1	Nickel insertion protein	AKB54033.1	3843.36	-2.20127	0.30646	3.71047e-14	8.62313e-11	Down
hypothetical protein] [protein_id=AKB53514.1	hypothetical protein	AKB53514.1	33.1868	-2.394	0.558794	1.05282e-06	0.000143927	Down
putative transporter PduT for various metalloporphyrins] [protein_id=AKB53513.1	putative transporter PduT for various metalloporphyrins	AKB53513.1	41.9808	-3.02728	0.57775	8.86602e-09	4.12092e-06	Down

## Sheet: 30˚C Ca.perchlorate (Table S10)
	Table S10. Significantly differentially expressed genes of M. barkeri supplemented with Ca(ClO4)2 (Wald test, P < 0.05). Differential expression is relative to the 30˚C perchlorate-free control.
	Abbreviations: ProteinID, GenBank protein accession number; baseMean, normalized transcript counts of all replicates normalized for sequencing depth;
	log2FoldChange, log2-fold change in expression of group relative to 30˚C perchlorate-free control; lfcSE, standard error of log2-fold change;
	padj, p-value adjusted for multiple testing using Benjamini-Hochberg correction.
Ca.perchlorate vs. Control	30˚C Ca.perchlorate vs. 30˚C Control
RowName	Protein	Protein ID	baseMean	log2FoldChange	lfcSE	pvalue	padj	regulation	Function {inferred from HHpred if hypothetical}	Metabolism
hypothetical protein] [protein_id=AKB54618.1	Dimethylamine permease	AKB53956.1	909.481	1.48824	0.342541	6.26e-07	0.00012791	Up	Yes
Triosephosphate isomerase] [protein_id=AKB53066.1	Monomethylamine permease	AKB53145.1	15.8619	1.30853	0.376346	2.6e-05	0.00188921	Up	Yes
Dimethylamine methyltransferase corrinoid protein] [protein_id=AKB53925.1	hypothetical protein	AKB54709.1	36.0422	1.25987	0.308825	1.91e-06	0.00027356	Up	Yes
hypothetical protein] [protein_id=AKB55114.1	Dimethylamine:corrinoid methyltransferase	AKB53924.1	3716	1.11905	0.295882	6.77e-06	0.00066806	Up	Yes
hypothetical protein] [protein_id=AKB55220.1	Dimethylamine:corrinoid methyltransferase	AKB53955.1	4413.94	1.07112	0.291286	1.04e-05	0.00087197	Up	Yes
hypothetical protein] [protein_id=AKB53701.1	Dimethylamine methyltransferase corrinoid protein	AKB53925.1	675.398	1.06116	0.211713	3e-08	1.22e-05	Up	Yes
Transcriptional regulator, ArsR family] [protein_id=AKB56326.1	Dimethylamine permease	AKB53923.1	65.1375	1.05706	0.240083	5.1e-07	0.00011238	Up	Yes
Dimethylamine methyltransferase corrinoid protein] [protein_id=AKB53954.1	Dimethylamine:corrinoid methyltransferase	AKB53455.1	3272.01	1.03465	0.278177	9e-06	0.00078061	Up	Yes
Formylmethanofuran dehydrogenase (molybdenum) subunit D] [protein_id=AKB53391.1	Dimethylamine methyltransferase corrinoid protein	AKB53954.1	1004.65	0.989767	0.20047	4.54e-08	1.36e-05	Up	Yes
protein identified by proteomics in Methanosarcina acetivorans (1)] [protein_id=AKB55318.1	Choline permease LicB	AKB53457.1	168.58	0.964722	0.166174	4.17e-10	3.98e-07	Up	Yes
hypothetical protein] [protein_id=AKB54107.1	Iron-sulfur cluster-binding protein	AKB55959.1	27.7966	0.914796	0.231164	3.46e-06	0.00039568	Up	Yes
putative exosome complex RNA-binding protein 1] [protein_id=AKB55033.1	hypothetical protein	AKB55986.1	42456	0.878238	0.274998	6.64e-05	0.00358659	Up	Yes
hypothetical protein] [protein_id=AKB54430.1	hypothetical protein	AKB53701.1	53.7334	0.865129	0.210198	2.36e-06	0.00032149	Up	Yes
Formylmethanofuran dehydrogenase (molybdenum) subunit D] [protein_id=AKB53640.1	Monomethylamine permease	AKB53147.1	197.307	0.83729	0.186038	3.7e-07	8.83e-05	Up	Yes
Monomethylamine:corrinoid methyltransferase] [transl_except=(pos:604..606,aa:Pyl)] [protein_id=AKB54848.1	anaerobic ribonucleoside-triphosphate reductase activating protein	AKB53927.1	31.9876	0.825403	0.245138	4.38e-05	0.00255569	Up	Yes
hypothetical protein] [protein_id=AKB54989.1	hypothetical protein	AKB55259.1	177.487	0.803202	0.1274	2.06e-11	5.91e-08	Up	Yes
hypothetical protein] [protein_id=AKB54299.1	Formylmethanofuran dehydrogenase (molybdenum) subunit D	AKB53391.1	290.721	0.753198	0.151803	4.75e-08	1.36e-05	Up	Yes
hypothetical protein] [protein_id=AKB55742.1	Formylmethanofuran dehydrogenase (molybdenum) subunit D	AKB53640.1	290.721	0.753198	0.151803	4.75e-08	1.36e-05	Up	Yes
hypothetical protein] [protein_id=AKB54177.1	Methylcobalamin:coenzyme M methyltransferase, methanol-specific	AKB54542.1	93.8866	0.752402	0.237061	7.33e-05	0.00374966	Up	Yes
CobN component of cobalt chelatase involved in B12 biosynthesis] [protein_id=AKB53653.1	Peptidyl-prolyl cis-trans isomerase	AKB53722.1	44.6692	0.743166	0.233002	7.34e-05	0.00374966	Up	Yes
Homocysteine desulfhydrase] [protein_id=AKB55953.1	hypothetical protein	AKB54430.1	39.9432	0.719296	0.278047	0.00049856	0.0166148	Up	Yes
Transporter] [protein_id=AKB56142.1	Monomethylamine permease	AKB53146.1	31.6809	0.710883	0.24844	0.00019523	0.00798204	Up	Yes
Dimethylamine permease] [protein_id=AKB53956.1	Ferredoxin	AKB53283.1	1783.57	0.699823	0.126723	2.38e-09	1.36e-06	Up	Yes
	Mobile element protein	AKB54814.1	22.5496	0.689113	0.348911	0.00199784	0.0418341	Up	Yes
Substrate-specific component NikM of nickel ECF transporter] [protein_id=AKB56129.1	hypothetical protein	AKB55038.1	206.393	0.629837	0.198159	7.93e-05	0.00398106	Up	Yes
Dimethylamine permease] [protein_id=AKB53923.1	Energy-conserving hydrogenase (ferredoxin), subunit A	AKB55804.1	1228.87	0.623652	0.14445	1.18e-06	0.00022469	Up	Yes
Dimethylamine:corrinoid methyltransferase] [transl_except=(pos:1066..1068,aa:Pyl)] [protein_id=AKB53924.1	Adenylate cyclase	AKB56113.1	107.419	0.599127	0.15619	8.42e-06	0.00077714	Up	Yes
anaerobic ribonucleoside-triphosphate reductase activating protein] [protein_id=AKB53927.1	Glycogen phosphorylase	AKB55353.1	217.564	0.598951	0.140538	1.52e-06	0.00024142	Up	Yes
Inosine-5'-monophosphate dehydrogenase] [protein_id=AKB53031.1	Energy-conserving hydrogenase (ferredoxin), subunit B	AKB55805.1	491.559	0.597176	0.186183	8.77e-05	0.00418261	Up	Yes
SSU ribosomal protein S8e] [protein_id=AKB53849.1	Cytosolic Fe-S cluster assembling factor NBP35	AKB55089.1	69.4669	0.590548	0.211675	0.00032665	0.0123008	Up	Yes
	hypothetical protein	AKB55880.1	91.6611	0.587634	0.255813	0.00098878	0.0266969	Up	Yes
hypothetical protein] [protein_id=AKB53054.1	N5-methyltetrahydromethanopterin:coenzyme M methyltransferase subunit E	AKB53358.1	2672.6	0.586583	0.151724	7.9e-06	0.0007535	Up	Yes
hypothetical protein] [protein_id=AKB55519.1	Twin-arginine translocation protein TatC	AKB54381.1	163.829	0.577807	0.226225	0.00061661	0.0187739	Up	Yes
Monomethylamine:corrinoid methyltransferase] [transl_except=(pos:604..606,aa:Pyl)] [protein_id=AKB53148.1	Deacetylase	AKB54800.1	113.85	0.567706	0.169996	5.63e-05	0.00322088	Up	Yes
Choline permease LicB] [protein_id=AKB53457.1	Cation transporter	AKB53087.1	845.536	0.554349	0.140909	6.56e-06	0.00066806	Up	Yes
DNA repair protein RadC] [protein_id=AKB55228.1	D-3-phosphoglycerate dehydrogenase	AKB53471.1	2467.55	0.550316	0.119568	3.6e-07	8.83e-05	Up	Yes
Monomethylamine permease] [protein_id=AKB53147.1	hypothetical protein	AKB54107.1	151.187	0.530021	0.142687	1.45e-05	0.00118249	Up	Yes
Energy-conserving hydrogenase (ferredoxin), subunit B] [protein_id=AKB55805.1	CO dehydrogenase/acetyl-CoA synthase subunit epsilon, CO dehydrogenase subcomplex	AKB53625.1	487.809	0.5266	0.144425	1.91e-05	0.00151316	Up	Yes
cell surface protein] [protein_id=AKB54061.1	conserved protein associated with acetyl-CoA C-acyltransferase	AKB56114.1	45.3805	0.522256	0.198035	0.00053217	0.0171131	Up	Yes
Peptidase M48, Ste24p precursor] [protein_id=AKB53103.1	TATA-box binding protein	AKB56316.1	84.6018	0.517544	0.19287	0.00049479	0.0166148	Up	Yes
	Ammonium transporter	AKB55798.1	352.988	0.516934	0.242229	0.00187838	0.0410375	Up	Yes
Adenylate cyclase] [protein_id=AKB56113.1	Cation transporter	AKB53088.1	821.167	0.498982	0.135914	2.07e-05	0.00155576	Up	Yes
Methanophenazine hydrogenase maturation protease] [protein_id=AKB55560.1	Phosphoribosylaminoimidazole-succinocarboxamide synthase	AKB56097.1	335.019	0.491549	0.126183	8.83e-06	0.00078061	Up	Yes
	Methylcobalamin:coenzyme M methyltransferase, methanol-specific	AKB54540.1	197.281	0.483795	0.24028	0.0024236	0.0475837	Up	Yes
	response regulator receiver	AKB53959.1	60.8767	0.478164	0.216705	0.00169306	0.0393946	Up	Yes
DUF447 family protein] [protein_id=AKB55840.1	Methanophenazine hydrogenase cytochrome b subunit	AKB55559.1	1222.08	0.455912	0.167115	0.00049926	0.0166148	Up	Yes
Dipeptide-binding ABC transporter, periplasmic substrate-binding component] [protein_id=AKB53218.1	Formylmethanofuran dehydrogenase (molybdenum) subunit B	AKB53641.1	999.916	0.444365	0.140522	0.00013173	0.00589062	Up	Yes
DUF378 domain-containing protein] [protein_id=AKB56093.1	dTDP-glucose 4,6-dehydratase	AKB55725.1	108.745	0.444138	0.164516	0.00059804	0.0184042	Up	Yes
Phosphoenolpyruvate synthase] [protein_id=AKB54742.1	Flavoprotein wrbA	AKB53756.1	166.383	0.435425	0.132635	9.35e-05	0.00431382	Up	Yes
	putative ATP-binding protein	AKB55159.1	58.4956	0.434899	0.208696	0.00266875	0.049257	Up	Yes
hypothetical protein] [protein_id=AKB55938.1	LSU ribosomal protein L27Ae (L15p)	AKB55589.1	843.256	0.433463	0.122883	3.84e-05	0.00244345	Up	Yes
Phosphoribosylaminoimidazole-succinocarboxamide synthase] [protein_id=AKB56097.1	Monomethylamine:corrinoid methyltransferase	AKB54848.1	1592.88	0.431732	0.122998	4.17e-05	0.00251061	Up	Yes
Monomethylamine methyltransferase corrinoid protein] [protein_id=AKB53149.1	Monomethylamine:corrinoid methyltransferase	AKB53148.1	1609.85	0.430586	0.122711	4.2e-05	0.00251061	Up	Yes
hypothetical protein] [protein_id=AKB55381.1	hypothetical protein	AKB55363.1	613.138	0.429621	0.138777	0.00018897	0.00795355	Up	Yes
Hydantoinase] [protein_id=AKB56322.1	Triosephosphate isomerase	AKB53066.1	205.713	0.418322	0.127875	0.00010622	0.00482523	Up	Yes
Transcriptional regulator, MerR family] [protein_id=AKB54924.1	Acetolactate synthase small subunit	AKB55737.1	130.907	0.415931	0.153968	0.00056706	0.0177181	Up	Yes
hypothetical protein] [protein_id=AKB55922.1	Trk system potassium uptake protein TrkA	AKB54202.1	140.851	0.415271	0.150776	0.00052677	0.0171131	Up	Yes
	Thioredoxin reductase	AKB54427.1	619.995	0.398877	0.171546	0.00168202	0.0393946	Up	Yes
	Dihydroorotate dehydrogenase electron transfer subunit	AKB53424.1	110.544	0.392613	0.180563	0.00261555	0.049257	Up	Yes
	Multi antimicrobial extrusion protein (Na(+)/drug antiporter), MATE family of MDR efflux pumps	AKB53965.1	134.755	0.388827	0.166752	0.00173154	0.039491	Up	Yes
	5-tetrahydromethanopterin:corrinoid iron-sulfur protein methyltransferase	AKB53621.1	1726.96	0.388097	0.164461	0.00172424	0.039491	Up	Yes
	hypothetical protein	AKB53816.1	1548.49	0.373107	0.151779	0.0014568	0.0369773	Up	Yes
5'-methylthioadenosine phosphorylase] [protein_id=AKB54845.1	hypothetical protein	AKB55242.1	188.417	0.372334	0.133125	0.00056956	0.0177181	Up	Yes
	tRNA S(4)U 4-thiouridine synthase (former ThiI)	AKB55094.1	138.11	0.367734	0.151626	0.00158757	0.037829	Up	Yes
	Pyruvate,phosphate dikinase	AKB53486.1	4042.99	0.366951	0.162244	0.00239874	0.0475837	Up	Yes
	Monomethylamine methyltransferase corrinoid protein	AKB53149.1	585.149	0.35917	0.155702	0.00200129	0.0418341	Up	Yes
	NAD(P)-dependent glyceraldehyde 3-phosphate dehydrogenase archaeal	AKB54919.1	227.78	0.357797	0.134324	0.00087874	0.024417	Up	Yes
hypothetical protein] [protein_id=AKB55904.1	V-type ATP synthase subunit C	AKB53590.1	1696.66	0.351404	0.118445	0.00038044	0.0139592	Up	Yes
DNA-directed RNA polymerase subunit K] [protein_id=AKB53478.1	Energy-conserving hydrogenase (ferredoxin), subunit E	AKB55808.1	566.153	0.346934	0.117059	0.0003928	0.0142302	Up	Yes
	Superoxide dismutase (Mn/Fe)	AKB54775.1	692.841	0.344743	0.145596	0.00202935	0.0418341	Up	Yes
	Formaldehyde activating enzyme	AKB55442.1	129.107	0.329344	0.131502	0.00158134	0.037829	Up	Yes
	Pyrroline-5-carboxylate reductase	AKB56048.1	325.417	0.328329	0.1431	0.00267258	0.049257	Up	Yes
	Nitrogenase (molybdenum-iron) reductase and maturation protein NifH	AKB55187.1	176.16	0.327424	0.134996	0.00190414	0.0412853	Up	Yes
	Hydantoinase	AKB54991.1	185.222	0.323347	0.137658	0.0024274	0.0475837	Up	Yes
	Cobalamin synthase	AKB53841.1	148.814	0.322291	0.138017	0.00265803	0.049257	Up	Yes
	Phosphoserine aminotransferase	AKB54894.1	355.204	0.317889	0.121745	0.00128559	0.0337555	Up	Yes
	Methylcobalamin:coenzyme M methyltransferase, methylamine-specific	AKB53150.1	1200.59	0.316516	0.115301	0.00081204	0.0230105	Up	Yes
	Formylmethanofuran dehydrogenase (molybdenum) subunit C	AKB53639.1	639.128	0.316287	0.135899	0.00262864	0.049257	Up	Yes
	Formylmethanofuran dehydrogenase (molybdenum) subunit C	AKB53390.1	639.123	0.316283	0.135903	0.00262922	0.049257	Up	Yes
Flavodoxin] [protein_id=AKB55257.1	hypothetical protein	AKB56426.1	301.726	0.314028	0.10588	0.0004087	0.0146212	Up	Yes
	Polyferredoxin protein MvhB	AKB53637.1	1860.7	0.313841	0.131307	0.00224182	0.0458292	Up	Yes
	Methanophenazine hydrogenase large subunit	AKB55558.1	3041.36	0.313	0.123609	0.0015945	0.037829	Up	Yes
tRNA S(4)U 4-thiouridine synthase (former ThiI)] [protein_id=AKB55094.1	Cell division protein FtsH	AKB54009.1	923.062	0.311145	0.0836472	3.27e-05	0.00228592	Up	Yes
	Polyferredoxin protein MvhB	AKB53388.1	1869.36	0.30715	0.131456	0.00267003	0.049257	Up	Yes
	V-type ATP synthase subunit E	AKB53591.1	683.097	0.29327	0.100857	0.00062331	0.018778	Up	Yes
Ferrous iron transport protein B] [protein_id=AKB53199.1	putative exosome complex RNA-binding protein 1	AKB55033.1	516.097	0.287541	0.0851737	0.00013729	0.00604494	Up	Yes
	Ketol-acid reductoisomerase	AKB55736.1	1237.56	0.269794	0.0921805	0.00070637	0.0206288	Up	Yes
	Serine--glyoxylate aminotransferase	AKB55426.1	742.376	0.228423	0.0828735	0.00155044	0.037829	Up	Yes
	Alanyl-tRNA synthetase	AKB53203	1057.63	0.223134	0.0809214	0.00159934	0.037829	Up	Yes
Ribose-phosphate pyrophosphokinase] [protein_id=AKB53554.1	hypothetical protein	AKB55078.1	15.3611	-0.0989227	0.201055	0.00019417	0.00798204	Down	Yes
	Coenzyme B synthesis from 2-oxoglutarate: steps 1, 6, and 10	AKB55237.1	662.019	-0.253707	0.097199	0.00187085	0.0410375	Down	Yes
	2-isopropylmalate synthase	AKB53060.1	2068.94	-0.295009	0.113978	0.00153714	0.037829	Down	Yes
Cell surface glycoprotein] [protein_id=AKB54935.1	SSU ribosomal protein S16e (S9p)	AKB53476.1	813.568	-0.311178	0.103505	0.0003795	0.0139592	Down	Yes
	Archaeal S-adenosylmethionine synthetase	AKB53238.1	225.755	-0.344635	0.145722	0.00195378	0.0418341	Down	Yes
	LSU ribosomal protein L15e	AKB55039.1	520.708	-0.351547	0.157104	0.00247213	0.0481309	Down	Yes
	Uridylate kinase	AKB53260.1	102.059	-0.357154	0.154057	0.00184055	0.0410375	Down	Yes
	Kef-type K+ transport systems (NAD-binding component fused to domain related to exopolyphosphatase)	AKB53549.1	290.15	-0.368081	0.170059	0.00272987	0.0497636	Down	Yes
hypothetical protein] [protein_id=AKB54173.1	hypothetical protein	AKB54174.1	414.248	-0.378292	0.118676	0.00015671	0.00679563	Down	Yes
Phycocyanin alpha phycocyanobilin lyase] [protein_id=AKB55518.1	hypothetical protein	AKB56495.1	281.414	-0.39031	0.14077	0.00056049	0.0177181	Down	Yes
	hypothetical protein	AKB55611.1	239.344	-0.392161	0.19116	0.00251505	0.0486356	Down	Yes
	hypothetical protein	AKB53713.1	113.018	-0.392273	0.172666	0.00201607	0.0418341	Down	Yes
	membrane protein, putative	AKB53976.1	58.8795	-0.401488	0.182004	0.00230794	0.0468463	Down	Yes
	hypothetical protein	AKB54497.1	88.5797	-0.411407	0.153447	0.00070258	0.0206288	Down	Yes
	Fe-S OXIDOREDUCTASE	AKB53057.1	81.0867	-0.427745	0.170588	0.00091455	0.0251676	Down	Yes
Putative snRNP Sm-like protein] [protein_id=AKB54278.1	hypothetical protein	AKB54173.1	266.786	-0.442481	0.151296	0.00025277	0.00991015	Down	Yes
Universal stress protein] [protein_id=AKB56056.1	hypothetical protein	AKB56437.1	337.895	-0.446205	0.143321	0.00016592	0.00708752	Down	Yes
	transcriptional regulator	AKB54175.1	93.4297	-0.447852	0.198582	0.00185132	0.0410375	Down	Yes
DNA repair and recombination protein RadA] [protein_id=AKB54962.1	Transporter	AKB56142.1	233.17	-0.44874	0.151508	0.00025641	0.00991675	Down	Yes
	hypothetical protein	AKB56166.1	55.1033	-0.449937	0.190101	0.00124462	0.0329824	Down	Yes
	hypothetical protein	AKB55864.1	47.6368	-0.455341	0.232486	0.00268487	0.049257	Down	Yes
	hypothetical protein	AKB56382.1	77.0498	-0.470209	0.19555	0.00112083	0.0299796	Down	Yes
CoB--CoM heterodisulfide reductase subunit C] [protein_id=AKB53710.1	alpha/beta superfamily	AKB56457.1	137.129	-0.473788	0.141233	6.77e-05	0.00358739	Down	Yes
	Cobalt-zinc-cadmium resistance protein	AKB53136.1	67.91	-0.47839	0.194675	0.00094066	0.0256397	Down	Yes
	SSU ribosomal protein S8e	AKB53849.1	258.394	-0.488383	0.194595	0.00075635	0.0218653	Down	Yes
Phosphoenolpyruvate carboxylase, archaeal] [protein_id=AKB54119.1	UvsW helicase	AKB53932.1	62.9679	-0.490509	0.179483	0.00043746	0.0154568	Down	Yes
hypothetical protein] [protein_id=AKB54617.1	Two-component response regulator	AKB56307.1	50.1513	-0.521944	0.181648	0.00028261	0.0107843	Down	Yes
Ornithine decarboxylase] [protein_id=AKB55259.1	hypothetical protein	AKB54177.1	191.265	-0.522166	0.131067	5.07e-06	0.00053713	Down	Yes
	hypothetical protein	AKB54617.1	134.906	-0.524907	0.21319	0.00076717	0.0219563	Down	Yes
	hypothetical protein	AKB53577.1	34.396	-0.525548	0.240911	0.00158844	0.037829	Down	Yes
	Ferrous iron transport protein B	AKB53199.1	335.893	-0.541178	0.222993	0.00085491	0.0239879	Down	Yes
hypothetical protein] [protein_id=AKB56128.1	DNA-directed RNA polymerase subunit K	AKB53478.1	109.103	-0.544796	0.21006	0.00047823	0.0166148	Down	Yes
	Indole-3-glycerol phosphate synthase	AKB54953.1	49.8173	-0.547135	0.247135	0.00132081	0.0343652	Down	Yes
	Amino acid permease	AKB53978.1	28.3805	-0.559826	0.266882	0.00178027	0.0401192	Down	Yes
	hypothetical protein	AKB53077.1	162.9	-0.571904	0.277005	0.0017386	0.039491	Down	Yes
Deacetylase] [protein_id=AKB54800.1	Putative snRNP Sm-like protein	AKB54278.1	115.524	-0.572835	0.166208	3.48e-05	0.00237337	Down	Yes
	hypothetical protein	AKB53175.1	24.7875	-0.575234	0.26114	0.00145997	0.0369773	Down	Yes
	5'-methylthioadenosine phosphorylase	AKB54845.1	79.6333	-0.592115	0.237298	0.00068925	0.0205484	Down	Yes
Cation transporter] [protein_id=AKB53087.1	hypothetical protein	AKB55381.1	68.6624	-0.603972	0.175428	3.83e-05	0.00244345	Down	Yes
	hypothetical protein	AKB54925.1	29.3215	-0.619046	0.327665	0.00233494	0.0470606	Down	Yes
	Peptidase M48, Ste24p precursor	AKB53103.1	329.835	-0.630395	0.352886	0.00239581	0.0475837	Down	Yes
O-antigen flippase Wzx] [protein_id=AKB56365.1	Phosphoenolpyruvate carboxylase, archaeal	AKB54119.1	71.8727	-0.651869	0.183021	1.96e-05	0.00151316	Down	Yes
	Homocysteine desulfhydrase	AKB55953.1	19.7291	-0.652666	0.327349	0.00202937	0.0418341	Down	Yes
hypothetical protein] [protein_id=AKB54391.1	SSU ribosomal protein S24e	AKB55669.1	125.391	-0.676646	0.215241	8.56e-05	0.00418261	Down	Yes
	Dinucleotide-utilizing enzymes involved in molybdopterin and thiamine biosynthesis family 2	AKB53338.1	23.8161	-0.68296	0.342314	0.00150871	0.037829	Down	Yes
hypothetical protein] [protein_id=AKB53770.1	Ribosomal-protein-S18p-alanine acetyltransferase	AKB53042.1	148.089	-0.68617	0.161378	1.49e-06	0.00024142	Down	Yes
	Ribonucleotide reductase of class II (coenzyme B12-dependent)	AKB53986.1	22.4643	-0.687337	0.322323	0.00133991	0.034548	Down	Yes
Cell surface glycoprotein] [protein_id=AKB54937.1	Cell surface glycoprotein	AKB54935.1	31.5951	-0.688465	0.27865	0.00048729	0.0166148	Down	Yes
Inosine-5'-monophosphate dehydrogenase] [protein_id=AKB56057.1	hypothetical protein	AKB55446.1	221.003	-0.69417	0.221078	8.93e-05	0.00418825	Down	Yes
SSU ribosomal protein S24e] [protein_id=AKB55669.1	Glycosyltransferase	AKB55714.1	42.3372	-0.696427	0.246367	0.00023434	0.00931486	Down	Yes
D-3-phosphoglycerate dehydrogenase] [protein_id=AKB53471.1	Sodium/potassium-transporting ATPase, alpha subunit	AKB56310.1	91.5069	-0.697913	0.210265	3.83e-05	0.00244345	Down	Yes
hypothetical protein] [protein_id=AKB55483.1	hypothetical protein	AKB56151.1	157.536	-0.732046	0.224643	6.5e-05	0.00357861	Down	Yes
Ribosomal-protein-S18p-alanine acetyltransferase] [protein_id=AKB55976.1	Beta-lysine acetyltransferase	AKB56251.1	84.5991	-0.823508	0.197072	1.44e-06	0.00024142	Down	Yes
Mobile element protein] [protein_id=AKB54814.1	hypothetical protein	AKB55698.1	486.78	-0.89999	0.155784	2.78e-10	3.98e-07	Down	Yes
	hypothetical protein	AKB53452.1	11.1654	-0.919122	0.486013	0.00203177	0.0418341	Down	Yes
cell surface protein] [protein_id=AKB53996.1	Chitin binding protein	AKB55281.1	534.476	-0.941957	0.173677	1.8e-09	1.29e-06	Down	Yes
Cation transporter] [protein_id=AKB53088.1	Glutaredoxin-like protein	AKB56462.1	25.0156	-0.983623	0.295509	4.21e-05	0.00251061	Down	Yes
Ribosomal-protein-S18p-alanine acetyltransferase] [protein_id=AKB53042.1	hypothetical protein	AKB55519.1	44.3969	-1.0259	0.338366	8.65e-05	0.00418261	Down	Yes
Ribosomal protein S6] [protein_id=AKB53580.1	hypothetical protein	AKB56378.1	60456.8	-1.04429	0.262342	2.61e-06	0.00033956	Down	Yes
Glycogen phosphorylase] [protein_id=AKB55353.1	hypothetical protein	AKB54264.1	19.7547	-1.07172	0.320449	2.64e-05	0.00188921	Down	Yes
Lysine 2,3-aminomutase] [protein_id=AKB56252.1	Ferredoxin	AKB55063.1	12.0615	-1.08717	0.451199	0.00052237	0.0171131	Down	Yes
dTDP-glucose 4,6-dehydratase] [protein_id=AKB55725.1	Phycocyanin alpha phycocyanobilin lyase	AKB55518.1	37.9449	-1.14163	0.297324	4.3e-06	0.00047336	Down	Yes
Peptidyl-prolyl cis-trans isomerase] [protein_id=AKB53722.1	Lysine 2,3-aminomutase	AKB56252.1	99.1697	-1.16517	0.22805	7.97e-09	3.8e-06	Down	Yes
Transcriptional regulator, MarR family] [protein_id=AKB53966.1	Transcriptional regulator, MerR family	AKB54924.1	474.136	-1.176	0.311883	3.39e-06	0.00039568	Down	Yes
hypothetical protein] [protein_id=AKB54304.1	hypothetical protein	AKB55364.1	12.1231	-1.24415	0.398776	6.27e-05	0.00351701	Down	Yes
hypothetical protein] [protein_id=AKB55698.1	hypothetical protein	AKB55520.1	15.7708	-1.26858	0.46599	0.00023089	0.00930734	Down	Yes
hypothetical protein] [protein_id=AKB53611.1	FeoA domain protein	AKB53198.1	17.9102	-1.27363	0.324649	3.21e-06	0.00039568	Down	Yes
Ferredoxin] [protein_id=AKB53283.1	DUF378 domain-containing protein	AKB56093.1	25.1975	-1.3903	0.340554	1.71e-06	0.00025726	Down	Yes

## Sheet: 0˚C Ca.perchlorate (Table S11)
	Table S11. Significantly differentially expressed genes of M. barkeri grown at 0˚C supplemented with Ca(ClO4)2 (Wald test, P < 0.05). Differential expression is relative to the 0˚C perchlorate-free control.
	Abbreviations: ProteinID, GenBank protein accession number; baseMean, normalized transcript counts of all replicates normalized for sequencing depth;
	log2FoldChange, log2-fold change in expression of group relative to 0˚C perchlorate-free control; lfcSE, standard error of log2-fold change;
	padj, p-value adjusted for multiple testing using Benjamini-Hochberg correction.
	0˚C Ca.perchlorate vs. 0˚C Control
	Protein	Protein ID	baseMean	log2FoldChange	lfcSE	pvalue	padj	regulation
polysaccharide biosynthesis protein] [protein_id=AKB53768.1	polysaccharide biosynthesis protein	AKB53768.1	34.1304	2.10758	0.613788	2.8858e-05	0.00275998	Up
membrane protein, putative] [protein_id=AKB55358.1	membrane protein, putative	AKB55358.1	43.389	1.78841	0.626766	0.000168025	0.00836975	Up
hypothetical protein] [protein_id=AKB53770.1	hypothetical protein	AKB53770.1	69.2578	1.58041	0.606154	0.000374167	0.0145421	Up
Nitrogen regulatory protein P-II] [protein_id=AKB54464.1	Nitrogen regulatory protein P-II	AKB54464.1	65.1774	1.55659	0.54598	0.00018141	0.00885205	Up
hypothetical protein] [protein_id=AKB54840.1	hypothetical protein	AKB54840.1	48.0066	1.47566	0.587662	0.000456954	0.0168089	Up
carboxymuconolactone decarboxylase] [protein_id=AKB55961.1	carboxymuconolactone decarboxylase	AKB55961.1	35.7242	1.47246	0.784075	0.00188191	0.0449964	Up
sensory transduction histidine kinase] [protein_id=AKB55041.1	sensory transduction histidine kinase	AKB55041.1	54.6116	1.41162	0.577533	0.000627312	0.020269	Up
hypothetical protein] [protein_id=AKB55991.1	hypothetical protein	AKB55991.1	1835.58	1.41044	0.30088	1.55511e-07	3.71827e-05	Up
hypothetical protein] [protein_id=AKB53284.1	hypothetical protein	AKB53284.1	50.9015	1.37523	0.512456	0.000323749	0.0133463	Up
hypothetical protein] [protein_id=AKB53519.1	hypothetical protein	AKB53519.1	1750.88	1.36527	0.300094	3.12852e-07	6.23357e-05	Up
hypothetical protein] [protein_id=AKB54825.1	hypothetical protein	AKB54825.1	49.8864	1.32527	0.563478	0.000821539	0.0245537	Up
hypothetical protein] [protein_id=AKB55220.1	hypothetical protein	AKB55220.1	272.08	1.26289	0.382712	5.19844e-05	0.00420854	Up
Nitrogenase (molybdenum-iron) reductase and maturation protein NifH] [protein_id=AKB55784.1	Nitrogenase (molybdenum-iron) reductase and maturation protein NifH	AKB55784.1	525.193	1.22533	0.301653	3.00981e-06	0.00042332	Up
transmembrane efflux protein] [protein_id=AKB54578.1	transmembrane efflux protein	AKB54578.1	44.4963	1.21029	0.738331	0.0029749	0.0464336	Up
hypothetical protein] [protein_id=AKB54296.1	hypothetical protein	AKB54296.1	144.587	1.20534	0.390652	0.000118384	0.00690381	Up
sensory transduction histidine kinase] [protein_id=AKB55361.1	sensory transduction histidine kinase	AKB55361.1	73.1618	1.18742	0.54744	0.0013549	0.0365596	Up
hypothetical protein] [protein_id=AKB53377.1	hypothetical protein	AKB53377.1	72.9118	1.12742	0.679632	0.00345468	0.0477465	Up
hypothetical protein] [protein_id=AKB55190.1	hypothetical protein	AKB55190.1	949.655	1.11604	0.637226	0.00278459	0.0464336	Up
Molybdopterin converting factor small subunit] [protein_id=AKB56063.1	Molybdopterin converting factor small subunit	AKB56063.1	60.9519	1.11479	0.576824	0.00207636	0.0464336	Up
surface layer protein B] [protein_id=AKB55917.1	surface layer protein B	AKB55917.1	61.7865	1.00795	0.546107	0.00288207	0.0464336	Up
KEOPS complex Cgi121-like subunit] [protein_id=AKB55542.1	KEOPS complex Cgi121-like subunit	AKB55542.1	105.667	1.0065	0.332576	0.000151552	0.00787739	Up
hypothetical protein] [protein_id=AKB53544.1	hypothetical protein	AKB53544.1	151.618	1.0045	0.355801	0.000293738	0.0130061	Up
Eukaryotic peptide chain release factor subunit 1] [protein_id=AKB55628.1	Eukaryotic peptide chain release factor subunit 1	AKB55628.1	148.365	0.992251	0.403852	0.000802051	0.0243148	Up
Nitrogen regulatory protein P-II] [protein_id=AKB55785.1	Nitrogen regulatory protein P-II	AKB55785.1	128.67	0.98645	0.532854	0.00283365	0.0464336	Up
Phenylacetate-coenzyme A ligase] [protein_id=AKB54702.1	Phenylacetate-coenzyme A ligase	AKB54702.1	192.868	0.917392	0.360384	0.000725623	0.022532	Up
hypothetical protein] [protein_id=AKB56430.1	hypothetical protein	AKB56430.1	74.7255	0.834603	0.440635	0.00325798	0.046604	Up
Indole-3-glycerol phosphate synthase] [protein_id=AKB54953.1	Indole-3-glycerol phosphate synthase	AKB54953.1	85.1313	0.814452	0.427458	0.00308959	0.0464336	Up
hypothetical protein] [protein_id=AKB56356.1	hypothetical protein	AKB56356.1	228.704	0.774109	0.288845	0.000543668	0.0188393	Up
Seryl-tRNA synthetase] [protein_id=AKB56107.1	Seryl-tRNA synthetase	AKB56107.1	678.335	0.758051	0.260936	0.000313558	0.0131529	Up
hypothetical protein] [protein_id=AKB54610.1	hypothetical protein	AKB54610.1	134.702	0.757221	0.356035	0.00249761	0.0464336	Up
hypothetical protein] [protein_id=AKB54692.1	hypothetical protein	AKB54692.1	457.041	0.740802	0.243727	0.000225271	0.0105612	Up
Trk system potassium uptake protein TrkA] [protein_id=AKB54303.1	Trk system potassium uptake protein TrkA	AKB54303.1	262.319	0.739269	0.306446	0.00135303	0.0365596	Up
HTH DNA-binding protein] [protein_id=AKB54006.1	HTH DNA-binding protein	AKB54006.1	321.17	0.73206	0.242807	0.0002621	0.0118242	Up
Nitrogenase FeMo-cofactor scaffold and assembly protein NifE] [protein_id=AKB55789.1	Nitrogenase FeMo-cofactor scaffold and assembly protein NifE	AKB55789.1	222.894	0.704022	0.329048	0.00270077	0.0464336	Up
Membrane protein involved in the export of O-antigen, teichoic acid lipoteichoic acids] [protein_id=AKB56375.1	Membrane protein involved in the export of O-antigen, teichoic acid lipoteichoic acids	AKB56375.1	198.063	0.694722	0.308406	0.002212	0.0464336	Up
Aspartate carbamoyltransferase regulatory chain (PyrI)] [protein_id=AKB56393.1	Aspartate carbamoyltransferase regulatory chain (PyrI)	AKB56393.1	270.795	0.693019	0.287465	0.0015939	0.040116	Up
hypothetical protein] [protein_id=AKB53541.1	hypothetical protein	AKB53541.1	238.863	0.594864	0.27249	0.00322754	0.0464883	Up
Diaminopimelate decarboxylase] [protein_id=AKB55913.1	Diaminopimelate decarboxylase	AKB55913.1	220.804	0.571849	0.248303	0.00260161	0.0464336	Up
Dimethylamine methyltransferase corrinoid protein] [protein_id=AKB53954.1	Dimethylamine methyltransferase corrinoid protein	AKB53954.1	1759.35	0.542587	0.241263	0.0034102	0.0476571	Up
Oligosaccharyl transferase] [protein_id=AKB55709.1	Oligosaccharyl transferase	AKB55709.1	1661.93	0.516221	0.228451	0.00367741	0.0496712	Up
hypothetical protein] [protein_id=AKB53005.1	hypothetical protein	AKB53005.1	6631.26	0.465912	0.19413	0.00318809	0.0464336	Up
hypothetical protein] [protein_id=AKB56432.1	hypothetical protein	AKB56432.1	6631.26	0.465912	0.19413	0.00318809	0.0464336	Up
hypothetical protein] [protein_id=AKB56468.1	hypothetical protein	AKB56468.1	6631.26	0.465912	0.19413	0.00318809	0.0464336	Up
hypothetical protein] [protein_id=AKB56515.1	hypothetical protein	AKB56515.1	6631.26	0.465912	0.19413	0.00318809	0.0464336	Up
hypothetical protein] [protein_id=AKB55759.1	hypothetical protein	AKB55759.1	6631.21	0.465844	0.194112	0.00319	0.0464336	Up
hypothetical protein] [protein_id=AKB55872.1	hypothetical protein	AKB55872.1	6631.21	0.465844	0.194112	0.00319	0.0464336	Up
hypothetical protein] [protein_id=AKB55905.1	hypothetical protein	AKB55905.1	6631.21	0.465844	0.194112	0.00319	0.0464336	Up
hypothetical protein] [protein_id=AKB56325.1	hypothetical protein	AKB56325.1	6631.21	0.465844	0.194112	0.00319	0.0464336	Up
hypothetical protein] [protein_id=AKB53796.1	hypothetical protein	AKB53796.1	6631.04	0.465831	0.194125	0.00319203	0.0464336	Up
hypothetical protein] [protein_id=AKB53922.1	hypothetical protein	AKB53922.1	6631.04	0.465831	0.194125	0.00319203	0.0464336	Up
hypothetical protein] [protein_id=AKB54021.1	hypothetical protein	AKB54021.1	6631.04	0.465831	0.194125	0.00319203	0.0464336	Up
hypothetical protein] [protein_id=AKB54153.1	hypothetical protein	AKB54153.1	6631.04	0.465831	0.194125	0.00319203	0.0464336	Up
hypothetical protein] [protein_id=AKB54226.1	hypothetical protein	AKB54226.1	6631.04	0.465831	0.194125	0.00319203	0.0464336	Up
hypothetical protein] [protein_id=AKB54250.1	hypothetical protein	AKB54250.1	6631.04	0.465831	0.194125	0.00319203	0.0464336	Up
hypothetical protein] [protein_id=AKB54339.1	hypothetical protein	AKB54339.1	6631.04	0.465831	0.194125	0.00319203	0.0464336	Up
hypothetical protein] [protein_id=AKB54496.1	hypothetical protein	AKB54496.1	6631.04	0.465831	0.194125	0.00319203	0.0464336	Up
hypothetical protein] [protein_id=AKB54518.1	hypothetical protein	AKB54518.1	6631.04	0.465831	0.194125	0.00319203	0.0464336	Up
hypothetical protein] [protein_id=AKB54411.1	hypothetical protein	AKB54411.1	6631.03	0.46583	0.194126	0.00319214	0.0464336	Up
hypothetical protein] [protein_id=AKB54546.1	hypothetical protein	AKB54546.1	6631.09	0.465827	0.194128	0.00319254	0.0464336	Up
hypothetical protein] [protein_id=AKB54752.1	hypothetical protein	AKB54752.1	6631.09	0.465827	0.194128	0.00319254	0.0464336	Up
hypothetical protein] [protein_id=AKB54933.1	hypothetical protein	AKB54933.1	6631.09	0.465827	0.194128	0.00319254	0.0464336	Up
hypothetical protein] [protein_id=AKB55074.1	hypothetical protein	AKB55074.1	6631.09	0.465827	0.194128	0.00319254	0.0464336	Up
hypothetical protein] [protein_id=AKB55121.1	hypothetical protein	AKB55121.1	6631.09	0.465827	0.194128	0.00319254	0.0464336	Up
hypothetical protein] [protein_id=AKB55250.1	hypothetical protein	AKB55250.1	6631.09	0.465827	0.194128	0.00319254	0.0464336	Up
hypothetical protein] [protein_id=AKB55326.1	hypothetical protein	AKB55326.1	6631.09	0.465827	0.194128	0.00319254	0.0464336	Up
hypothetical protein] [protein_id=AKB55359.1	hypothetical protein	AKB55359.1	6631.09	0.465827	0.194128	0.00319254	0.0464336	Up
hypothetical protein] [protein_id=AKB55618.1	hypothetical protein	AKB55618.1	6631.09	0.465827	0.194128	0.00319254	0.0464336	Up
hypothetical protein] [protein_id=AKB55656.1	hypothetical protein	AKB55656.1	6631.09	0.465827	0.194128	0.00319254	0.0464336	Up
hypothetical protein] [protein_id=AKB55676.1	hypothetical protein	AKB55676.1	6631.09	0.465827	0.194128	0.00319254	0.0464336	Up
hypothetical protein] [protein_id=AKB55711.1	hypothetical protein	AKB55711.1	6631.09	0.465827	0.194128	0.00319254	0.0464336	Up
hypothetical protein] [protein_id=AKB55740.1	hypothetical protein	AKB55740.1	6631.09	0.465827	0.194128	0.00319254	0.0464336	Up
hypothetical protein] [protein_id=AKB55105.1	hypothetical protein	AKB55105.1	6630.98	0.465763	0.194122	0.00319544	0.0464336	Up
hypothetical protein] [protein_id=AKB53160.1	hypothetical protein	AKB53160.1	6630.98	0.465722	0.194124	0.00319792	0.0464336	Up
hypothetical protein] [protein_id=AKB53282.1	hypothetical protein	AKB53282.1	6630.98	0.465722	0.194124	0.00319792	0.0464336	Up
hypothetical protein] [protein_id=AKB53397.1	hypothetical protein	AKB53397.1	6630.98	0.465722	0.194124	0.00319792	0.0464336	Up
hypothetical protein] [protein_id=AKB53405.1	hypothetical protein	AKB53405.1	6630.98	0.465722	0.194124	0.00319792	0.0464336	Up
hypothetical protein] [protein_id=AKB53411.1	hypothetical protein	AKB53411.1	6630.98	0.465722	0.194124	0.00319792	0.0464336	Up
hypothetical protein] [protein_id=AKB53461.1	hypothetical protein	AKB53461.1	6630.98	0.465722	0.194124	0.00319792	0.0464336	Up
hypothetical protein] [protein_id=AKB53776.1	hypothetical protein	AKB53776.1	6630.98	0.465722	0.194124	0.00319792	0.0464336	Up
hypothetical protein] [protein_id=AKB54470.1	hypothetical protein	AKB54470.1	6630.47	0.465672	0.194161	0.00320433	0.0464336	Up
LSU ribosomal protein L9e (L6p)] [protein_id=AKB55595.1	LSU ribosomal protein L9e (L6p)	AKB55595.1	1528.1	-0.469869	0.194786	0.00304659	0.0464336	Down
SSU ribosomal protein S13e (S15p)] [protein_id=AKB53826.1	SSU ribosomal protein S13e (S15p)	AKB53826.1	768.645	-0.485268	0.195576	0.00253796	0.0464336	Down
Translation initiation factor 2] [protein_id=AKB54135.1	Translation initiation factor 2	AKB54135.1	1605.79	-0.516799	0.166518	0.000358289	0.0142778	Down
Eukaryotic translation initiation factor 2 alpha subunit] [protein_id=AKB55889.1	Eukaryotic translation initiation factor 2 alpha subunit	AKB55889.1	1437.65	-0.520108	0.230412	0.00364357	0.0494987	Down
LSU ribosomal protein L17e (L22p)] [protein_id=AKB55605.1	LSU ribosomal protein L17e (L22p)	AKB55605.1	1112.75	-0.520692	0.230986	0.00342828	0.0476571	Down
Chitin binding protein] [protein_id=AKB54545.1	Chitin binding protein	AKB54545.1	529.996	-0.541097	0.232586	0.00276398	0.0464336	Down
hypothetical protein] [protein_id=AKB53630.1	hypothetical protein	AKB53630.1	100770	-0.551856	0.189343	0.000552154	0.01886	Down
Deoxyhypusine synthase] [protein_id=AKB55461.1	Deoxyhypusine synthase	AKB55461.1	401.683	-0.552715	0.234408	0.00251518	0.0464336	Down
SSU ribosomal protein SAe (S2p)] [protein_id=AKB53479.1	SSU ribosomal protein SAe (S2p)	AKB53479.1	2444.19	-0.556385	0.166569	0.000133226	0.0072635	Down
LSU ribosomal protein L18e] [protein_id=AKB53474.1	LSU ribosomal protein L18e	AKB53474.1	1252.01	-0.566112	0.257291	0.00354002	0.0485394	Down
Chaperone protein DnaK] [protein_id=AKB54200.1	Chaperone protein DnaK	AKB54200.1	1678.43	-0.600062	0.223594	0.000923706	0.0272664	Down
LSU ribosomal protein P0 (L10p)] [protein_id=AKB56173.1	LSU ribosomal protein P0 (L10p)	AKB56173.1	3281.86	-0.606268	0.171274	5.6325e-05	0.00420854	Down
SSU ribosomal protein S4e] [protein_id=AKB55599.1	SSU ribosomal protein S4e	AKB55599.1	1523.3	-0.607876	0.236222	0.00121918	0.0342948	Down
SSU ribosomal protein S9e (S4p)] [protein_id=AKB55577.1	SSU ribosomal protein S9e (S4p)	AKB55577.1	868.337	-0.630134	0.261193	0.00173578	0.0423496	Down
cell surface protein] [protein_id=AKB54641.1	cell surface protein	AKB54641.1	888.575	-0.639157	0.216733	0.000377084	0.0145421	Down
ATP-utilizing enzymes of the PP-loop superfamily protein] [protein_id=AKB56021.1	ATP-utilizing enzymes of the PP-loop superfamily protein	AKB56021.1	1650.33	-0.657077	0.192688	0.000340019	0.0137794	Down
Fmn-binding protein] [protein_id=AKB54032.1	Fmn-binding protein	AKB54032.1	815.135	-0.659472	0.302392	0.0027534	0.0464336	Down
Coenzyme F420 hydrogenase subunit beta] [protein_id=AKB56015.1	Coenzyme F420 hydrogenase subunit beta	AKB56015.1	1893.5	-0.662197	0.270581	0.00145404	0.037878	Down
Phosphoserine phosphatase] [protein_id=AKB56346.1	Phosphoserine phosphatase	AKB56346.1	1101.84	-0.666863	0.207415	0.000147067	0.00781415	Down
DNA-directed RNA polymerase subunit N] [protein_id=AKB53477.1	DNA-directed RNA polymerase subunit N	AKB53477.1	689.663	-0.670782	0.272501	0.00137614	0.0365596	Down
NADH-plastoquinone oxidoreductase subunit] [protein_id=AKB53152.1	NADH-plastoquinone oxidoreductase subunit	AKB53152.1	558.546	-0.67587	0.195107	6.21607e-05	0.00450382	Down
Oligopeptide ABC transporter, periplasmic oligopeptide-binding protein OppA] [protein_id=AKB53686.1	Oligopeptide ABC transporter, periplasmic oligopeptide-binding protein OppA	AKB53686.1	169.734	-0.676611	0.278973	0.00148016	0.0379673	Down
ATP-dependent protease La Type I] [protein_id=AKB55307.1	ATP-dependent protease La Type I	AKB55307.1	1686.88	-0.67757	0.197337	6.8559e-05	0.00455346	Down
archaeosine tRNA-ribosyltransferase type 2] [protein_id=AKB53043.1	archaeosine tRNA-ribosyltransferase type 2	AKB53043.1	222.724	-0.695006	0.284552	0.00149265	0.0379673	Down
SSU ribosomal protein S18e (S13p)] [protein_id=AKB55578.1	SSU ribosomal protein S18e (S13p)	AKB55578.1	638.854	-0.697034	0.296285	0.00176494	0.042626	Down
Inosine-5'-monophosphate dehydrogenase] [protein_id=AKB56057.1	Inosine-5'-monophosphate dehydrogenase	AKB56057.1	591.347	-0.697183	0.266754	0.000956681	0.0278954	Down
putative oxidoreductase] [protein_id=AKB54563.1	putative oxidoreductase	AKB54563.1	226.117	-0.703474	0.261641	0.00068923	0.0219727	Down
SSU ribosomal protein S3e (S3p)] [protein_id=AKB55604.1	SSU ribosomal protein S3e (S3p)	AKB55604.1	3573.4	-0.703995	0.317576	0.00227	0.0464336	Down
Additional substrate-specific component NikN of nickel ECF transporter] [protein_id=AKB56130.1	Additional substrate-specific component NikN of nickel ECF transporter	AKB56130.1	603.724	-0.707303	0.268377	0.000803374	0.0243148	Down
UDP-N-acetylmuramoylalanine--D-glutamate ligase] [protein_id=AKB53572.1	UDP-N-acetylmuramoylalanine--D-glutamate ligase	AKB53572.1	390.557	-0.714194	0.260097	0.000570391	0.0192085	Down
hypothetical protein] [protein_id=AKB54173.1	hypothetical protein	AKB54173.1	429.33	-0.715773	0.298682	0.00145746	0.037878	Down
Putative ski2-type helicase] [protein_id=AKB54261.1	Putative ski2-type helicase	AKB54261.1	180.224	-0.721971	0.332141	0.00241276	0.0464336	Down
SSU ribosomal protein S2e (S5p)] [protein_id=AKB55591.1	SSU ribosomal protein S2e (S5p)	AKB55591.1	2590.65	-0.726928	0.272668	0.000700867	0.0220496	Down
Ribonuclease P protein component 1] [protein_id=AKB55602.1	Ribonuclease P protein component 1	AKB55602.1	300.22	-0.731027	0.368176	0.00342432	0.0476571	Down
Phosphoenolpyruvate synthase] [protein_id=AKB54742.1	Phosphoenolpyruvate synthase	AKB54742.1	551.378	-0.735364	0.374469	0.00355265	0.0485394	Down
DNA primase] [protein_id=AKB53040.1	DNA primase	AKB53040.1	928.333	-0.738736	0.228245	0.000117411	0.00690381	Down
Putative transcription antitermination protein NusG] [protein_id=AKB56176.1	Putative transcription antitermination protein NusG	AKB56176.1	787.424	-0.742545	0.267399	0.000497046	0.017477	Down
LSU ribosomal protein L10Ae (L1p)] [protein_id=AKB56174.1	LSU ribosomal protein L10Ae (L1p)	AKB56174.1	2399.42	-0.744101	0.222734	8.22303e-05	0.00531386	Down
Aspartokinase] [protein_id=AKB53133.1	Aspartokinase	AKB53133.1	839.337	-0.747844	0.323629	0.00165586	0.040816	Down
LSU ribosomal protein L11e (L5p)] [protein_id=AKB55598.1	LSU ribosomal protein L11e (L5p)	AKB55598.1	1400.42	-0.752044	0.270344	0.000478438	0.0172864	Down
Oligopeptide transport system permease protein OppB] [protein_id=AKB53684.1	Oligopeptide transport system permease protein OppB	AKB53684.1	137.043	-0.766422	0.350471	0.00207248	0.0464336	Down
hypothetical protein] [protein_id=AKB56098.1	hypothetical protein	AKB56098.1	175.618	-0.779325	0.289856	0.000601575	0.0199773	Down
Cobalt-precorrin-6y C5-methyltransferase] [protein_id=AKB53414.1	Cobalt-precorrin-6y C5-methyltransferase	AKB53414.1	156.693	-0.785829	0.320443	0.00123453	0.0343228	Down
Dipeptide-binding ABC transporter, periplasmic substrate-binding component] [protein_id=AKB53218.1	Dipeptide-binding ABC transporter, periplasmic substrate-binding component	AKB53218.1	340.862	-0.786935	0.365271	0.00219466	0.0464336	Down
HSP20 type chaperone] [protein_id=AKB55507.1	HSP20 type chaperone	AKB55507.1	1854.13	-0.798432	0.245113	9.8518e-05	0.00603991	Down
Phosphoribosylaminoimidazolecarboxamide formyltransferase(alternate form)] [protein_id=AKB53229.1	Phosphoribosylaminoimidazolecarboxamide formyltransferase(alternate form)	AKB53229.1	244.412	-0.799054	0.386201	0.0024487	0.0464336	Down
DNA topoisomerase VI subunit A] [protein_id=AKB54646.1	DNA topoisomerase VI subunit A	AKB54646.1	108.375	-0.809506	0.421876	0.00327456	0.046604	Down
Dipeptide transport system permease protein DppB] [protein_id=AKB53383.1	Dipeptide transport system permease protein DppB	AKB53383.1	428.03	-0.815003	0.375764	0.00198856	0.0464336	Down
hypothetical protein] [protein_id=AKB53950.1	hypothetical protein	AKB53950.1	10329	-0.833141	0.316396	0.000626868	0.020269	Down
hypothetical protein] [protein_id=AKB53464.1	hypothetical protein	AKB53464.1	346.73	-0.836744	0.291306	0.000311681	0.0131529	Down
Methanol:corrinoid methyltransferase] [protein_id=AKB55351.1	Methanol:corrinoid methyltransferase	AKB55351.1	3010.08	-0.842265	0.363573	0.0013641	0.0365596	Down
DNA-directed RNA polymerase subunit D] [protein_id=AKB55575.1	DNA-directed RNA polymerase subunit D	AKB55575.1	1650.77	-0.848592	0.248954	5.34173e-05	0.00420854	Down
DNA-binding protein] [protein_id=AKB56020.1	DNA-binding protein	AKB56020.1	564.535	-0.874022	0.277893	0.000133665	0.0072635	Down
Indolepyruvate oxidoreductase subunit IorA] [protein_id=AKB53805.1	Indolepyruvate oxidoreductase subunit IorA	AKB53805.1	507.936	-0.874096	0.235997	1.93103e-05	0.00213778	Down
6-hydroxymethyl-7,8-dihydropterin pyrophosphokinase] [protein_id=AKB53988.1	6-hydroxymethyl-7,8-dihydropterin pyrophosphokinase	AKB53988.1	72.7268	-0.881646	0.416988	0.00202694	0.0464336	Down
Cell division protein FtsH] [protein_id=AKB53084.1	Cell division protein FtsH	AKB53084.1	1732.55	-0.890772	0.185107	1.2939e-07	3.67993e-05	Down
ATP-dependent DNA helicase RecQ] [protein_id=AKB56389.1	ATP-dependent DNA helicase RecQ	AKB56389.1	177.617	-0.897675	0.335982	0.000484394	0.0172864	Down
Lysine 2,3-aminomutase] [protein_id=AKB56252.1	Lysine 2,3-aminomutase	AKB56252.1	159.222	-0.908074	0.458554	0.00247947	0.0464336	Down
LSU ribosomal protein L8e (L2p)] [protein_id=AKB55607.1	LSU ribosomal protein L8e (L2p)	AKB55607.1	1298.59	-0.921678	0.277909	6.74037e-05	0.00455346	Down
Trk system potassium uptake protein TrkA] [protein_id=AKB54245.1	Trk system potassium uptake protein TrkA	AKB54245.1	206.952	-0.955464	0.316171	0.000167293	0.00836975	Down
Coenzyme F420 hydrogenase subunit alpha] [protein_id=AKB56018.1	Coenzyme F420 hydrogenase subunit alpha	AKB56018.1	4312.66	-0.96524	0.196083	1.07802e-07	3.67993e-05	Down
Pyruvate carboxyl transferase subunit B] [protein_id=AKB55870.1	Pyruvate carboxyl transferase subunit B	AKB55870.1	543.461	-0.972468	0.231039	1.93291e-06	0.000288849	Down
Pyruvate carboxyl transferase subunit A] [protein_id=AKB55869.1	Pyruvate carboxyl transferase subunit A	AKB55869.1	496.451	-0.989684	0.213486	2.64016e-07	5.73874e-05	Down
LSU ribosomal protein L23Ae (L23p)] [protein_id=AKB55608.1	LSU ribosomal protein L23Ae (L23p)	AKB55608.1	526.372	-1.02179	0.366439	0.000309511	0.0131529	Down
hypothetical protein] [protein_id=AKB56017.1	hypothetical protein	AKB56017.1	1473.93	-1.02281	0.224941	3.84349e-07	6.90393e-05	Down
hypothetical protein] [protein_id=AKB55611.1	hypothetical protein	AKB55611.1	341.895	-1.02422	0.263892	6.8963e-06	0.000824453	Down
Pyrimidine deaminase archaeal predicted] [protein_id=AKB56055.1	Pyrimidine deaminase archaeal predicted	AKB56055.1	377.897	-1.025	0.237466	1.08703e-06	0.000173272	Down
Coenzyme F420 hydrogenase subunit gamma] [protein_id=AKB56016.1	Coenzyme F420 hydrogenase subunit gamma	AKB56016.1	2845.96	-1.03007	0.292191	2.81822e-05	0.00275998	Down
Outer membrane protein] [protein_id=AKB53393.1	Outer membrane protein	AKB53393.1	506.282	-1.05342	0.613582	0.00334275	0.0472929	Down
Dipeptide-binding ABC transporter, periplasmic substrate-binding component] [protein_id=AKB53217.1	Dipeptide-binding ABC transporter, periplasmic substrate-binding component	AKB53217.1	117.533	-1.07579	0.54845	0.00209829	0.0464336	Down
LSU ribosomal protein L1e (L4p)] [protein_id=AKB55609.1	LSU ribosomal protein L1e (L4p)	AKB55609.1	1720.09	-1.08987	0.341745	8.49403e-05	0.00534454	Down
Coenzyme F420 hydrogenase subunit alpha] [protein_id=AKB54451.1	Coenzyme F420 hydrogenase subunit alpha	AKB54451.1	1593.71	-1.09071	0.240671	4.04245e-07	6.90393e-05	Down
hypothetical protein] [protein_id=AKB54067.1	hypothetical protein	AKB54067.1	120.887	-1.11654	0.381848	0.000193971	0.0092757	Down
Acetolactate synthase large subunit] [protein_id=AKB55738.1	Acetolactate synthase large subunit	AKB55738.1	560.702	-1.13694	0.239495	1.38517e-07	3.67993e-05	Down
Transcriptional regulator, MerR family] [protein_id=AKB54924.1	Transcriptional regulator, MerR family	AKB54924.1	693.474	-1.13761	0.543402	0.00161689	0.0402707	Down
Oligopeptide ABC transporter, periplasmic oligopeptide-binding protein OppA] [protein_id=AKB53384.1	Oligopeptide ABC transporter, periplasmic oligopeptide-binding protein OppA	AKB53384.1	494.234	-1.14546	0.318601	1.96701e-05	0.00213778	Down
SSU ribosomal protein S14e (S11p)] [protein_id=AKB55576.1	SSU ribosomal protein S14e (S11p)	AKB55576.1	635.897	-1.15588	0.350799	5.63239e-05	0.00420854	Down
Thymidylate synthase] [protein_id=AKB55418.1	Thymidylate synthase	AKB55418.1	89.459	-1.20434	0.456497	0.000388487	0.014744	Down
Cell surface glycoprotein] [protein_id=AKB54937.1	Cell surface glycoprotein	AKB54937.1	88.0097	-1.21752	0.544554	0.00104608	0.0297759	Down
Coenzyme F420 hydrogenase subunit gamma] [protein_id=AKB54452.1	Coenzyme F420 hydrogenase subunit gamma	AKB54452.1	688.477	-1.22031	0.309685	4.82722e-06	0.000607467	Down
hypothetical protein] [protein_id=AKB55904.1	hypothetical protein	AKB55904.1	432.896	-1.22423	0.359436	3.64485e-05	0.00334198	Down
LSU ribosomal protein L35e (L29p)] [protein_id=AKB55603.1	LSU ribosomal protein L35e (L29p)	AKB55603.1	647.946	-1.23816	0.353444	2.54915e-05	0.00265001	Down
cell surface protein] [protein_id=AKB54061.1	cell surface protein	AKB54061.1	144.024	-1.24213	0.549166	0.000973578	0.0280461	Down
cell surface protein] [protein_id=AKB53948.1	cell surface protein	AKB53948.1	374.231	-1.24934	0.315614	4.33505e-06	0.00057584	Down
cell surface protein] [protein_id=AKB54941.1	cell surface protein	AKB54941.1	1126.18	-1.29934	0.249985	1.24694e-08	9.93809e-06	Down
cell surface protein] [protein_id=AKB54940.1	cell surface protein	AKB54940.1	1074.07	-1.32007	0.249457	7.27617e-09	8.69866e-06	Down
ABC transporter, permease protein] [protein_id=AKB54065.1	ABC transporter, permease protein	AKB54065.1	91.1378	-1.34389	0.478175	0.000235297	0.0108191	Down
LSU ribosomal protein L3e (L3p)] [protein_id=AKB55610.1	LSU ribosomal protein L3e (L3p)	AKB55610.1	2657.75	-1.34823	0.268754	3.16294e-08	1.89065e-05	Down
Methanol:corrinoid methyltransferase] [protein_id=AKB56319.1	Methanol:corrinoid methyltransferase	AKB56319.1	10009.3	-1.38022	0.429575	6.49966e-05	0.00455346	Down
Iron(III) dicitrate-binding protein] [protein_id=AKB53821.1	Iron(III) dicitrate-binding protein	AKB53821.1	311.281	-1.39248	0.421334	4.92448e-05	0.00420515	Down
cell surface protein] [protein_id=AKB54070.1	cell surface protein	AKB54070.1	1534.5	-1.40153	0.258843	3.60156e-09	8.61132e-06	Down
Methanol methyltransferase corrinoid protein] [protein_id=AKB53301.1	Methanol methyltransferase corrinoid protein	AKB53301.1	557.925	-1.41574	0.553468	0.00043986	0.0164329	Down
Transcriptional regulator, TrmB family] [protein_id=AKB53961.1	Transcriptional regulator, TrmB family	AKB53961.1	40.1656	-1.41854	0.78661	0.00238405	0.0464336	Down
Iron(III) dicitrate-binding protein] [protein_id=AKB53820.1	Iron(III) dicitrate-binding protein	AKB53820.1	322.509	-1.41918	0.420688	3.77388e-05	0.00334198	Down
Cell surface glycoprotein] [protein_id=AKB54935.1	Cell surface glycoprotein	AKB54935.1	50.9818	-1.46814	0.489538	0.000121715	0.00692904	Down
Bacterioferritin] [protein_id=AKB53061.1	Bacterioferritin	AKB53061.1	35.1937	-1.48323	1.00246	0.00369781	0.0496712	Down
hypothetical protein] [protein_id=AKB56128.1	hypothetical protein	AKB56128.1	149.642	-2.34422	0.498754	1.16187e-07	3.67993e-05	Down
Cell surface protein] [protein_id=AKB54936.1	Cell surface protein	AKB54936.1	119.601	-2.43407	0.518289	1.14615e-07	3.67993e-05	Down
