# Supplementary material for: Regulatory responses of Methanosarcina barkeri to freezing temperatures and perchlorates: Transcriptomic insights into the potential for biological Martian methanogenesis
Source: Research Square preprint supplement (doi:10.21203/rs.3.rs-247246/v1), 2021-02-22
Supplement: Supplementary file 6 [file 089d508dd7bfa7afbac4addc.xlsx]

## Sheet: Sheet1
Table 2. Differential expression (Log2-fold change ± standard error) of M. barkeri MS genes implicated in the Wood-Ljungdahl pathway and hydrogenotrophic methanogenesis. LFC is for 0˚C and perchlorate-incubated M. barkeri MS relative to 0˚C perchlorate-free control. (Wald test, p < 0.05). Abbreviations: n.s.d., no significant difference from control; W, tungsten active site; Mo, molybdenum active…
Gene	0˚C Ca(ClO4)2	0˚C Mg(ClO4)2	0˚C Na(ClO4)
fmdA	n.s.d.	0.79 ± 0.23 (W)	n.s.d.
fmdB	n.s.d.	1.04 ± 0.24 (W)	0.72 ± 0.24 (W)
		-0.65 ± 0.22 (Mo)	-0.66 ± 0.22 (Mo)
			-0.74 ± 0.23 (Mo)
fmdC	n.s.d.	1.05 ± 0.32 (W)	0.76 ± 0.33 (W)
fmdE	n.s.d.	n.s.d.	-0.69 ± 0.22 (Mo)
hdrA	n.s.d.	2.66 ± 0.71	1.23 ± 0.89
			-0.69 ± 0.29
hdrB	n.s.d.	1.52 ± 0.54	1.06 ± 0.61
cdhε	n.s.d.	-0.71 ± 0.22	-1.00 ± 0.21
cdhγ	n.s.d.	-0.82 ± 0.19	-0.67 ± 0.19
		-0.82 ± 0.22	-0.71 ± 0.22
cdha	n.s.d.	-0.68 ± 0.22	-1.01 ± 0.22
		-0.77 ± 0.23	-1.04 ± 0.22
cdhb	n.s.d.	n.s.d.	-0.76 ± 0.22
			-0.76 ± 0.22
cdhd	n.s.d.	-0.66 ± 0.21	-0.71 ± 0.20
		-0.67 ± 0.20	-0.72 ± 0.20
